# Supplementary material for: Causal roles of skin and gut microbiota in skin appendage disorders suggested by genetic study
Source: Front Immunol. 2024 Sep 10;15:1427276. doi: 10.3389/fimmu.2024.1427276 (PMC11419992; doi:10.3389/fimmu.2024.1427276)
Supplement: Supplementary file 1 [file Table1.xlsx]

## Sheet: Table S1
Table S1. Detailed information for instrumental variables between SADs and skin microbiota in the forward MR
Outcome	Exposure	Microenvironment	SNP	Effect_allele	Other_allele	Beta.exposure	Beta.outcome	Eaf.outcome	Palindromic	Pos.outcome	Pval.outcome	Se.outcome	Pval.exposure	Se.exposure	Mr_keep
DISORDSKINAPPENDIX	Asv001[P. Acnes]	Dry	rs66498356	C	G	-0.468274	-0.226832	0.303773	FALSE	75935911	0.0401504	0.110531	1.03564e-06	0.0935627	TRUE
DISORDSKINAPPENDIX	Asv001[P. Acnes]	Dry	rs12572683	G	A	0.51164	0.0298097	0.308993	FALSE	7610458	0.0159126	0.0123645	2.15459e-07	0.0960113	TRUE
DISORDSKINAPPENDIX	Asv001[P. Acnes]	Dry	rs66498356	C	G	-0.468274	-0.0269869	0.30371	FALSE	75935911	0.0297797	0.0124192	1.03564e-06	0.0935627	TRUE
DISORDSKINAPPENDIX	Asv001[P. Acnes]	Dry	rs7728634	A	T	-0.479931	-0.0293978	0.219397	FALSE	162791082	0.0330103	0.0137891	5.1034e-06	0.10302	TRUE
DISORDSKINAPPENDIX	Asv001[P. Acnes]	Dry	rs12572683	G	A	0.51164	0.332354	0.30871	FALSE	7610458	0.00452554	0.117067	2.15459e-07	0.0960113	TRUE
DISORDSKINAPPENDIX	Asv001[P. Acnes]	Dry	rs11597091	T	C	0.464439	-0.0648094	0.677295	FALSE	18695270	0.0455072	0.0324058	7.31111e-06	0.101454	TRUE
DISORDSKINAPPENDIX	Asv003[Staphylococcus (unc.)]	Dry	rs11206972	A	G	-0.597683	0.0863841	0.221549	FALSE	57100826	0.00809879	0.0326234	7.80134e-07	0.118013	TRUE
DISORDSKINAPPENDIX	Asv003[Staphylococcus (unc.)]	Dry	rs11597091	T	C	0.464439	-0.0686565	0.677161	FALSE	18695270	0.0310277	0.0318338	7.31111e-06	0.101454	TRUE
DISORDSKINAPPENDIX	Asv003[Staphylococcus (unc.)]	Dry	rs11597091	T	C	0.464439	-0.255409	0.677161	FALSE	18695270	0.0149503	0.104952	7.31111e-06	0.101454	TRUE
DISORDSKINAPPENDIX	Asv003[Staphylococcus (unc.)]	Dry	rs13091364	G	A	0.413532	0.0427063	0.544516	FALSE	8375785	0.00509178	0.0152459	1.62157e-06	0.0842318	TRUE
DISORDSKINAPPENDIX	Asv003[Staphylococcus (unc.)]	Dry	rs7728634	A	T	-0.479931	-0.0860936	0.21938	FALSE	162791082	0.000275201	0.0236677	5.1034e-06	0.10302	TRUE
DISORDSKINAPPENDIX	Asv003[Staphylococcus (unc.)]	Dry	rs66498356	C	G	-0.468274	-0.0472394	0.303748	FALSE	75935911	0.021229	0.0205043	1.03564e-06	0.0935627	TRUE
DISORDSKINAPPENDIX	Asv003[Staphylococcus (unc.)]	Dry	rs66498356	C	G	-0.468274	0.0409281	0.303599	FALSE	75935911	0.0027364	0.0136614	1.03564e-06	0.0935627	TRUE
DISORDSKINAPPENDIX	Asv003[Staphylococcus (unc.)]	Dry	rs12572683	G	A	0.51164	0.0362233	0.308901	FALSE	7610458	0.00774908	0.0136034	2.15459e-07	0.0960113	TRUE
DISORDSKINAPPENDIX	Asv003[Staphylococcus (unc.)]	Dry	rs4964363	T	C	-0.42224	0.0324767	0.286624	FALSE	105386121	0.0201284	0.0139748	8.82665e-06	0.0931062	TRUE
DISORDSKINAPPENDIX	Asv003[Staphylococcus (unc.)]	Dry	rs66498356	C	G	-0.468274	0.0197387	0.30371	FALSE	75935911	0.0151057	0.00812349	1.03564e-06	0.0935627	TRUE
DISORDSKINAPPENDIX	Asv007[Anaerococcus (unc.)]	Sebaceous	rs11206972	A	G	-0.597683	0.200686	0.221472	FALSE	57100826	0.0198276	0.0861465	7.80134e-07	0.118013	TRUE
DISORDSKINAPPENDIX	Asv007[Anaerococcus (unc.)]	Sebaceous	rs12572683	G	A	0.51164	0.176805	0.308727	FALSE	7610458	0.0131302	0.0712859	2.15459e-07	0.0960113	TRUE
DISORDSKINAPPENDIX	Asv007[Anaerococcus (unc.)]	Sebaceous	rs12572683	G	A	0.51164	0.147802	0.308831	FALSE	7610458	0.0174117	0.0621566	2.15459e-07	0.0960113	TRUE
DISORDSKINAPPENDIX	Asv007[Anaerococcus (unc.)]	Sebaceous	rs66498356	C	G	-0.468274	0.125582	0.303646	FALSE	75935911	0.0439359	0.0623324	1.03564e-06	0.0935627	TRUE
DISORDSKINAPPENDIX	Asv007[Anaerococcus (unc.)]	Sebaceous	rs12025055	G	C	-0.51773	-0.337278	0.165659	FALSE	231039898	0.000200808	0.0907148	8.80168e-06	0.114146	TRUE
DISORDSKINAPPENDIX	Asv007[Anaerococcus (unc.)]	Sebaceous	rs12025055	G	C	-0.51773	-0.340389	0.165693	FALSE	231039898	0.0164695	0.141927	8.80168e-06	0.114146	TRUE
DISORDSKINAPPENDIX	Asv007[Anaerococcus (unc.)]	Sebaceous	rs7728634	A	T	-0.479931	-0.0356262	0.219354	FALSE	162791082	0.0487225	0.0180751	5.1034e-06	0.10302	TRUE
DISORDSKINAPPENDIX	Asv010[Staphylococcus (unc.)]	Dry	rs11597091	T	C	0.464439	-0.0178447	0.677257	FALSE	18695270	0.00265317	0.0160199	7.31111e-06	0.101454	TRUE
DISORDSKINAPPENDIX	Asv010[Staphylococcus (unc.)]	Dry	rs66498356	C	G	-0.468274	0.0163843	0.303708	FALSE	75935911	0.00313742	0.0162639	1.03564e-06	0.0935627	TRUE
DISORDSKINAPPENDIX	Asv010[Staphylococcus (unc.)]	Dry	rs12572683	G	A	0.51164	-0.012648	0.308953	FALSE	7610458	0.00434922	0.0161988	2.15459e-07	0.0960113	TRUE
DISORDSKINAPPENDIX	Asv010[Staphylococcus (unc.)]	Dry	rs11206972	A	G	-0.597683	-0.0112612	0.221604	FALSE	57100826	0.00533796	0.0180984	7.80134e-07	0.118013	TRUE
DISORDSKINAPPENDIX	Asv010[Staphylococcus (unc.)]	Dry	rs187967	C	T	0.413199	0.00657267	0.718662	FALSE	5057841	0.00693022	0.0166499	7.41773e-06	0.0903257	TRUE
DISORDSKINAPPENDIX	Asv010[Staphylococcus (unc.)]	Dry	rs35541683	G	A	-0.704247	-0.00862932	0.06941	FALSE	51667348	0.00771092	0.0296593	9.69538e-06	0.156028	TRUE
DISORDSKINAPPENDIX	Asv010[Staphylococcus (unc.)]	Dry	rs12025055	G	C	-0.51773	-0.00537562	0.165693	FALSE	231039898	0.0078952	0.0201384	8.80168e-06	0.114146	TRUE
DISORDSKINAPPENDIX	Asv010[Staphylococcus (unc.)]	Dry	rs4964363	T	C	-0.42224	0.00283698	0.286367	FALSE	105386121	0.00863747	0.0165319	8.82665e-06	0.0931062	TRUE
DISORDSKINAPPENDIX	Asv010[Staphylococcus (unc.)]	Dry	rs13091364	G	A	0.413532	-0.000594792	0.544554	FALSE	8375785	0.00968327	0.0149799	1.62157e-06	0.0842318	TRUE
DISORDSKINAPPENDIX	Asv026[Cloacibacterium (unc.)]	Moist	rs66498356	C	G	-0.468274	-0.0142865	0.303848	FALSE	75935911	0.00496252	0.0123702	1.03564e-06	0.0935627	TRUE
DISORDSKINAPPENDIX	Asv026[Cloacibacterium (unc.)]	Moist	rs11597091	T	C	0.464439	-0.0111915	0.676732	FALSE	18695270	0.00714962	0.0121623	7.31111e-06	0.101454	TRUE
DISORDSKINAPPENDIX	Asv026[Cloacibacterium (unc.)]	Moist	rs12572683	G	A	0.51164	-0.0112894	0.309264	FALSE	7610458	0.0071537	0.012274	2.15459e-07	0.0960113	TRUE
DISORDSKINAPPENDIX	Asv026[Cloacibacterium (unc.)]	Moist	rs35541683	G	A	-0.704247	-0.0180021	0.0693344	FALSE	51667348	0.00838864	0.0222962	9.69538e-06	0.156028	TRUE
DISORDSKINAPPENDIX	Asv026[Cloacibacterium (unc.)]	Moist	rs12025055	G	C	-0.51773	-0.00973876	0.165467	FALSE	231039898	0.0104665	0.0152591	8.80168e-06	0.114146	TRUE
DISORDSKINAPPENDIX	Asv026[Cloacibacterium (unc.)]	Moist	rs13091364	G	A	0.413532	-0.0063287	0.544146	FALSE	8375785	0.0115456	0.0113548	1.62157e-06	0.0842318	TRUE
DISORDSKINAPPENDIX	Asv026[Cloacibacterium (unc.)]	Moist	rs4964363	T	C	-0.42224	-0.00602117	0.2865	FALSE	105386121	0.0126207	0.012537	8.82665e-06	0.0931062	TRUE
DISORDSKINAPPENDIX	Asv035[Staphylococcus (unc.)]	Dry	rs187967	C	T	0.413199	-0.0041652	0.718797	FALSE	5057841	0.0148168	0.0125936	7.41773e-06	0.0903257	TRUE
DISORDSKINAPPENDIX	Asv035[Staphylococcus (unc.)]	Dry	rs11206972	A	G	-0.597683	-0.00432204	0.222255	FALSE	57100826	0.0150589	0.0137314	7.80134e-07	0.118013	TRUE
DISORDSKINAPPENDIX	Asv035[Staphylococcus (unc.)]	Dry	rs7728634	A	T	-0.479931	0.00266244	0.220061	FALSE	162791082	0.0169228	0.0137205	5.1034e-06	0.10302	TRUE
DISORDSKINAPPENDIX	Asv035[Staphylococcus (unc.)]	Dry	rs12572683	G	A	0.51164	0.0756656	0.30955	FALSE	7610458	0.00017254	0.0280082	2.15459e-07	0.0960113	TRUE
DISORDSKINAPPENDIX	Genus Anaerococcus	Dry	rs4964363	T	C	-0.42224	-0.0612368	0.286455	FALSE	105386121	0.000859193	0.0289436	8.82665e-06	0.0931062	TRUE
DISORDSKINAPPENDIX	Genus Anaerococcus	Dry	rs35541683	G	A	-0.704247	-0.0927465	0.0692709	FALSE	51667348	0.00181067	0.0516283	9.69538e-06	0.156028	TRUE
DISORDSKINAPPENDIX	Genus Anaerococcus	Dry	rs66498356	C	G	-0.468274	-0.0402311	0.304065	FALSE	75935911	0.0040044	0.0286449	1.03564e-06	0.0935627	TRUE
DISORDSKINAPPENDIX	Genus Anaerococcus	Dry	rs12025055	G	C	-0.51773	-0.0405032	0.165457	FALSE	231039898	0.00625868	0.0352353	8.80168e-06	0.114146	TRUE
DISORDSKINAPPENDIX	Genus Anaerococcus	Dry	rs187967	C	T	0.413199	0.0305793	0.718907	FALSE	5057841	0.00735428	0.0291505	7.41773e-06	0.0903257	TRUE
DISORDSKINAPPENDIX	Genus Anaerococcus	Dry	rs7728634	A	T	-0.479931	-0.0311419	0.22002	FALSE	162791082	0.00816695	0.0317507	5.1034e-06	0.10302	TRUE
DISORDSKINAPPENDIX	Genus Anaerococcus	Dry	rs11597091	T	C	0.464439	-0.0207616	0.676787	FALSE	18695270	0.0115163	0.0281408	7.31111e-06	0.101454	TRUE
DISORDSKINAPPENDIX	Genus Anaerococcus	Dry	rs11206972	A	G	-0.597683	0.00595457	0.222499	FALSE	57100826	0.0212893	0.0318236	7.80134e-07	0.118013	TRUE
DISORDSKINAPPENDIX	Genus Anaerococcus	Dry	rs13091364	G	A	0.413532	-0.00298541	0.544238	FALSE	8375785	0.0227353	0.0262385	1.62157e-06	0.0842318	TRUE
DISORDSKINAPPENDIX	Genus Anaerococcus	Dry	rs7728634	A	T	-0.479931	-0.085585	0.21992	FALSE	162791082	0.000221095	0.0315261	5.1034e-06	0.10302	TRUE
DISORDSKINAPPENDIX	Genus Anaerococcus	Dry	rs4964363	T	C	-0.42224	-0.0478159	0.286497	FALSE	105386121	0.00306647	0.028378	8.82665e-06	0.0931062	TRUE
DISORDSKINAPPENDIX	Genus Anaerococcus	Dry	rs11597091	T	C	0.464439	-0.0459652	0.676721	FALSE	18695270	0.00319535	0.0276024	7.31111e-06	0.101454	TRUE
DISORDSKINAPPENDIX	Genus Anaerococcus	Dry	rs66498356	C	G	-0.468274	-0.0432544	0.304055	FALSE	75935911	0.0041065	0.0280599	1.03564e-06	0.0935627	TRUE
DISORDSKINAPPENDIX	Genus Anaerococcus	Dry	rs11206972	A	G	-0.597683	0.0402754	0.222553	FALSE	57100826	0.00654833	0.0311795	7.80134e-07	0.118013	TRUE
DISORDSKINAPPENDIX	Genus Paracoccus	Moist	rs187967	C	T	0.413199	-0.0261172	0.718791	FALSE	5057841	0.0120714	0.0286596	7.41773e-06	0.0903257	TRUE
DISORDSKINAPPENDIX	Genus Paracoccus	Moist	rs13091364	G	A	0.413532	0.0191772	0.544282	FALSE	8375785	0.015246	0.0258046	1.62157e-06	0.0842318	TRUE
DISORDSKINAPPENDIX	Genus Paracoccus	Moist	rs35541683	G	A	-0.704247	0.0306804	0.0693672	FALSE	51667348	0.0180323	0.0501847	9.69538e-06	0.156028	TRUE
DISORDSKINAPPENDIX	Genus Paracoccus	Moist	rs12025055	G	C	-0.51773	0.00832408	0.165542	FALSE	231039898	0.0269773	0.0344959	8.80168e-06	0.114146	TRUE
DISORDSKINAPPENDIX	Genus Paracoccus	Moist	rs12572683	G	A	0.51164	-0.00150029	0.309364	FALSE	7610458	0.0319032	0.0278876	2.15459e-07	0.0960113	TRUE
DISORDSKINAPPENDIX	Genus Paracoccus	Moist	rs2646126	G	C	-0.429562	-0.0490254	0.616527	FALSE	84854991	0.00268231	0.028047	5.29e-06	0.0921638	TRUE
DISORDSKINAPPENDIX	Genus Streptococcus	Moist	rs62304877	A	G	-0.921781	-0.0740982	0.104376	FALSE	66535928	0.00313263	0.0442437	9.32e-06	0.20339	TRUE
DISORDSKINAPPENDIX	Genus Streptococcus	Moist	rs1592679	A	C	-0.593968	0.0425433	0.213923	FALSE	29166618	0.00669433	0.033258	4.03e-06	0.125792	TRUE
DISORDSKINAPPENDIX	Genus Streptococcus	Moist	rs13131366	G	A	0.647842	0.0355471	0.110511	FALSE	92836128	0.0137523	0.0433828	2.04e-06	0.132974	TRUE
DISORDSKINAPPENDIX	Genus Streptococcus	Moist	rs10189078	C	T	-0.710133	0.0255371	0.867383	FALSE	13616706	0.0174334	0.0399814	2.99e-06	0.148323	TRUE
DISORDSKINAPPENDIX	Genus Streptococcus	Moist	rs61942139	A	G	-0.555147	0.010034	0.129487	FALSE	106269985	0.0268247	0.0405881	8.92e-06	0.12222	TRUE
DISORDSKINAPPENDIX	Genus Streptococcus	Moist	rs13131366	G	A	0.647842	0.292334	0.110659	FALSE	92836128	0.00287256	0.162381	2.03689e-06	0.132974	TRUE
DISORDSKINAPPENDIX	Genus Streptococcus	Moist	rs2646126	G	C	-0.429562	-0.164317	0.615933	FALSE	84854991	0.00466724	0.104737	5.28932e-06	0.0921638	TRUE
DISORDSKINAPPENDIX	Genus Streptococcus	Moist	rs10189078	C	T	-0.710133	0.112391	0.866905	FALSE	13616706	0.0181768	0.150241	2.9917e-06	0.148323	TRUE
DISORDSKINAPPENDIX	Family Rhodobacteraceae	Moist	rs1592679	A	C	-0.593968	-0.0921436	0.214122	FALSE	29166618	0.0183882	0.124631	4.02798e-06	0.125792	TRUE
DISORDSKINAPPENDIX	Family Rhodobacteraceae	Moist	rs62304877	A	G	-0.921781	0.115718	0.104662	FALSE	66535928	0.0194455	0.16615	9.31962e-06	0.20339	TRUE
DISORDSKINAPPENDIX	Family Rhodobacteraceae	Moist	rs61942139	A	G	-0.555147	-0.0332297	0.129009	FALSE	106269985	0.0330907	0.152285	8.91769e-06	0.12222	TRUE
DISORDSKINAPPENDIX	Family Rhodobacteraceae	Moist	rs9852272	A	G	-0.418518	0.241218	0.397548	FALSE	82073886	0.0130771	0.0972	4.73504e-06	0.089213	TRUE
DISORDSKINAPPENDIX	Family Rhodobacteraceae	Moist	rs11256416	T	C	0.486233	-0.0836254	0.160549	FALSE	6033396	0.0254484	0.0374243	5.86385e-06	0.104725	TRUE
DISORDSKINAPPENDIX	Family Rhodobacteraceae	Moist	rs12089924	G	T	-0.676305	-0.042445	0.103876	FALSE	234628451	0.0238776	0.0187885	5.31799e-06	0.144972	TRUE
DISORDSKINAPPENDIX	Family Rhodobacteraceae	Moist	rs56395519	G	C	0.77314	0.159114	0.17084	FALSE	66523214	0.00707001	0.0590728	2.32389e-08	0.133436	TRUE
DISORDSKINAPPENDIX	Family Rhodobacteraceae	Moist	rs12089924	G	T	-0.676305	-0.182349	0.103993	FALSE	234628451	0.0169453	0.0763639	5.31799e-06	0.144972	TRUE
DISORDSKINAPPENDIX	Family Rhodobacteraceae	Moist	rs113237157	G	A	0.877454	0.111486	0.117689	FALSE	8735006	0.0328534	0.0522459	2.80183e-06	0.182494	TRUE
DISORDSKINAPPENDIX	Order Actinomycetales	Moist	rs2200706	T	C	-0.713618	-0.167425	0.124641	FALSE	3631924	8.46389e-05	0.0425924	9.85944e-06	0.157737	TRUE
DISORDSKINAPPENDIX	Order Actinomycetales	Moist	rs4795754	G	A	-0.434858	0.277017	0.357948	FALSE	33248157	0.0299454	0.12761	5.10492e-06	0.0930318	TRUE
DISORDSKINAPPENDIX	Order Actinomycetales	Moist	rs113237157	G	A	0.877454	0.0852696	0.117777	FALSE	8735006	0.0474384	0.043014	2.80183e-06	0.182494	TRUE
DISORDSKINAPPENDIX	Order Actinomycetales	Moist	rs9852272	A	G	-0.418518	-0.0348135	0.397003	FALSE	82073886	0.0218998	0.0151885	4.73504e-06	0.089213	TRUE
DISORDSKINAPPENDIX	Order Actinomycetales	Moist	rs2200706	T	C	-0.713618	0.0471439	0.124563	FALSE	3631924	0.0352079	0.0223859	9.85944e-06	0.157737	TRUE
DISORDSKINAPPENDIX	Order Actinomycetales	Moist	rs12089924	G	T	-0.676305	-0.0793204	0.103921	FALSE	234628451	0.0128342	0.0318769	5.31799e-06	0.144972	TRUE
DISORDSKINAPPENDIX	Order Actinomycetales	Moist	rs2149820	T	C	-0.410968	0.0496926	0.60487	FALSE	68254133	0.0103084	0.019371	5.90174e-06	0.0885419	TRUE
DISORDSKINAPPENDIX	Order Actinomycetales	Moist	rs11256416	T	C	0.486233	-0.059587	0.160936	FALSE	6033396	0.000703736	0.017587	5.86385e-06	0.104725	TRUE
DISORDSKINAPPENDIX	Order Actinomycetales	Moist	rs501534	C	T	0.651773	-0.0382154	0.241943	FALSE	182630430	0.00965428	0.0147666	7.816e-07	0.128197	TRUE
DISORDSKINAPPENDIX	Order Actinomycetales	Moist	rs56395519	G	C	0.77314	0.0381303	0.170773	FALSE	66523214	0.0234736	0.0168298	2.32389e-08	0.133436	TRUE
DISORDSKINAPPENDIX	Order Actinomycetales	Moist	rs501534	C	T	0.651773	-0.074632	0.242092	FALSE	182630430	0.0355509	0.0355047	7.816e-07	0.128197	TRUE
DISORDSKINAPPENDIX	Order Actinomycetales	Moist	rs11256416	T	C	0.486233	-0.0377442	0.160514	FALSE	6033396	0.000267036	0.0103541	5.86385e-06	0.104725	TRUE
DISORDSKINAPPENDIX	Order Actinomycetales	Moist	rs501534	C	T	0.651773	-0.0263852	0.241793	FALSE	182630430	0.00247805	0.00871945	7.816e-07	0.128197	TRUE
DISORDSKINAPPENDIX	Order Actinomycetales	Dry	rs56395519	G	C	0.77314	0.0238652	0.170848	FALSE	66523214	0.0165875	0.00996157	2.32389e-08	0.133436	TRUE
DISORDSKINAPPENDIX	Order Actinomycetales	Dry	rs9852272	A	G	-0.418518	0.190526	0.397093	FALSE	82073886	0.00629637	0.0697403	4.73504e-06	0.089213	TRUE
DISORDSKINAPPENDIX	Order Actinomycetales	Dry	rs11256416	T	C	0.486233	-0.257433	0.161312	FALSE	6033396	0.0215105	0.111981	5.86385e-06	0.104725	TRUE
DISORDSKINAPPENDIX	Order Actinomycetales	Dry	rs11256416	T	C	0.486233	-0.0602819	0.160514	FALSE	6033396	0.000553184	0.0174549	5.86385e-06	0.104725	TRUE
DISORDSKINAPPENDIX	Order Actinomycetales	Dry	rs28593062	C	G	0.760861	0.0334566	0.202083	FALSE	86781533	0.0337676	0.0157603	3.56694e-06	0.160026	TRUE
DISORDSKINAPPENDIX	Order Actinomycetales	Dry	rs12089924	G	T	-0.676305	-0.043959	0.103876	FALSE	234628451	0.0340056	0.0207353	5.31799e-06	0.144972	TRUE
DISORDSKINAPPENDIX	Order Actinomycetales	Dry	rs1073179	G	A	-0.425656	-0.1629	0.39827	FALSE	231889428	0.0129036	0.0655161	4.38405e-06	0.0904012	TRUE
DISORDSKINAPPENDIX	Order Actinomycetales	Sebaceous	rs113237157	G	A	0.877454	0.223918	0.117852	FALSE	8735006	0.0252813	0.100094	2.80183e-06	0.182494	TRUE
DISORDSKINAPPENDIX	Order Actinomycetales	Sebaceous	rs11256416	T	C	0.486233	-0.0503386	0.160649	FALSE	6033396	0.0137221	0.0204258	5.86385e-06	0.104725	TRUE
DISORDSKINAPPENDIX	Order Actinomycetales	Sebaceous	rs12089924	G	T	-0.676305	-0.0512238	0.103891	FALSE	234628451	0.0376903	0.0246482	5.31799e-06	0.144972	TRUE
DISORDSKINAPPENDIX	Order Actinomycetales	Sebaceous	rs9852272	A	G	-0.418518	-0.0301765	0.396925	FALSE	82073886	0.0491926	0.015342	4.73504e-06	0.089213	TRUE
DISORDSKINAPPENDIX	Order Actinomycetales	Sebaceous	rs28593062	C	G	0.760861	0.0247046	0.20199	FALSE	86781533	0.00187345	0.0187373	3.56694e-06	0.160026	TRUE
DISORDSKINAPPENDIX	Order Actinomycetales	Sebaceous	rs1073179	G	A	-0.425656	-0.0152266	0.398253	FALSE	231889428	0.00317698	0.0152388	4.38405e-06	0.0904012	TRUE
DISORDSKINAPPENDIX	Order Actinomycetales	Sebaceous	rs113237157	G	A	0.877454	-0.0202857	0.117768	FALSE	8735006	0.00385174	0.0233599	2.80183e-06	0.182494	TRUE
DISORDSKINAPPENDIX	Order Actinomycetales	Sebaceous	rs2149820	T	C	-0.410968	0.0102876	0.604656	FALSE	68254133	0.00503003	0.0153599	5.90174e-06	0.0885419	TRUE
DISORDSKINAPPENDIX	Order Actinomycetales	Sebaceous	rs56395519	G	C	0.77314	0.00357596	0.170879	FALSE	66523214	0.00857417	0.0199037	2.32389e-08	0.133436	TRUE
DISORDSKINAPPENDIX	Order Actinomycetales	Sebaceous	rs2200706	T	C	-0.713618	-0.00311246	0.124533	FALSE	3631924	0.00890346	0.022576	9.85944e-06	0.157737	TRUE
DISORDSKINAPPENDIX	Order Actinomycetales	Sebaceous	rs501534	C	T	0.651773	-0.00122893	0.241742	FALSE	182630430	0.00943698	0.0174015	7.816e-07	0.128197	TRUE
DISORDSKINAPPENDIX	Order Actinomycetales	Sebaceous	rs4795754	G	A	-0.434858	-2.22619e-05	0.358027	FALSE	33248157	0.0099886	0.0155843	5.10492e-06	0.0930318	TRUE
DISORDSKINAPPENDIX	Order Actinomycetales	Sebaceous	rs4795754	G	A	-0.434858	0.0205735	0.358167	FALSE	33248157	0.00163399	0.0118177	5.10492e-06	0.0930318	TRUE
DISORDSKINAPPENDIX	Class Alphaproteobacteria	Dry	rs28593062	C	G	0.760861	0.0234413	0.202484	FALSE	86781533	0.00196644	0.0141807	3.56694e-06	0.160026	TRUE
DISORDSKINAPPENDIX	Class Alphaproteobacteria	Dry	rs12089924	G	T	-0.676305	-0.0128332	0.103773	FALSE	234628451	0.0098338	0.0186631	5.31799e-06	0.144972	TRUE
DISORDSKINAPPENDIX	Class Alphaproteobacteria	Dry	rs2200706	T	C	-0.713618	0.0117025	0.124692	FALSE	3631924	0.00991502	0.0171794	9.85944e-06	0.157737	TRUE
DISORDSKINAPPENDIX	Class Alphaproteobacteria	Dry	rs9852272	A	G	-0.418518	-0.00782933	0.398194	FALSE	82073886	0.0100099	0.0116212	4.73504e-06	0.089213	TRUE
DISORDSKINAPPENDIX	Class Alphaproteobacteria	Dry	rs11256416	T	C	0.486233	0.00882511	0.1602	FALSE	6033396	0.0114108	0.0155575	5.86385e-06	0.104725	TRUE
DISORDSKINAPPENDIX	Class Alphaproteobacteria	Dry	rs113237157	G	A	0.877454	-0.00687521	0.117998	FALSE	8735006	0.0139862	0.0177998	2.80183e-06	0.182494	TRUE
DISORDSKINAPPENDIX	Class Alphaproteobacteria	Dry	rs501534	C	T	0.651773	0.00335273	0.241668	FALSE	182630430	0.0159846	0.013182	7.816e-07	0.128197	TRUE
DISORDSKINAPPENDIX	Class Alphaproteobacteria	Dry	rs1073179	G	A	-0.425656	0.00242796	0.397928	FALSE	231889428	0.0166764	0.0115725	4.38405e-06	0.0904012	TRUE
DISORDSKINAPPENDIX	Class Alphaproteobacteria	Dry	rs56395519	G	C	0.77314	0.00230498	0.170677	FALSE	66523214	0.0175814	0.0151497	2.32389e-08	0.133436	TRUE
DISORDSKINAPPENDIX	Phylum Firmicutes	Dry	rs2149820	T	C	-0.410968	0.00165545	0.605085	FALSE	68254133	0.0177416	0.0116582	5.90174e-06	0.0885419	TRUE
DISORDSKINAPPENDIX	Phylum Firmicutes	Dry	rs501534	C	T	0.651773	-0.0425396	0.241552	FALSE	182630430	0.00406972	0.0304779	7.816e-07	0.128197	TRUE
DISORDSKINAPPENDIX	Phylum Firmicutes	Dry	rs56395519	G	C	0.77314	0.0395898	0.170864	FALSE	66523214	0.00643423	0.0349539	2.32389e-08	0.133436	TRUE
DISORDSKINAPPENDIX	Phylum Firmicutes	Dry	rs1073179	G	A	-0.425656	0.0207899	0.397828	FALSE	231889428	0.0109286	0.0267557	4.38405e-06	0.0904012	TRUE
DISORDSKINAPPENDIX	Phylum Firmicutes	Dry	rs11256416	T	C	0.486233	0.0210697	0.1602	FALSE	6033396	0.0139175	0.035848	5.86385e-06	0.104725	TRUE
DISORDSKINAPPENDIX	Phylum Firmicutes	Dry	rs113237157	G	A	0.877454	0.0238434	0.118132	FALSE	8735006	0.0141237	0.0414303	2.80183e-06	0.182494	TRUE
DISORDSKINAPPENDIX	Phylum Firmicutes	Dry	rs12089924	G	T	-0.676305	0.0181381	0.103859	FALSE	234628451	0.0168443	0.0430855	5.31799e-06	0.144972	TRUE
DISORDSKINAPPENDIX	Phylum Firmicutes	Dry	rs4795754	G	A	-0.434858	0.0104668	0.358062	FALSE	33248157	0.0175383	0.0273104	5.10492e-06	0.0930318	TRUE
DISORDSKINAPPENDIX	Phylum Firmicutes	Dry	rs2149820	T	C	-0.410968	-0.00810864	0.604957	FALSE	68254133	0.0190841	0.0269328	5.90174e-06	0.0885419	TRUE
DISORDSKINAPPENDIX	Phylum Proteobacteria	Moist	rs2200706	T	C	-0.713618	0.00507507	0.12469	FALSE	3631924	0.0224554	0.0396757	9.85944e-06	0.157737	TRUE
DISORDSKINAPPENDIX	Phylum Proteobacteria	Moist	rs9852272	A	G	-0.418518	-0.00151681	0.398447	FALSE	82073886	0.0238766	0.0269197	4.73504e-06	0.089213	TRUE
DISORDSKINAPPENDIX	Phylum Proteobacteria	Moist	rs28593062	C	G	0.760861	0.00111628	0.202318	FALSE	86781533	0.0243227	0.0328683	3.56694e-06	0.160026	TRUE
DISORDSKINAPPENDIX	Phylum Proteobacteria	Moist	rs28593062	C	G	0.760861	0.0728876	0.202421	FALSE	86781533	0.00080712	0.032341	3.56694e-06	0.160026	TRUE
DISORDSKINAPPENDIX	Phylum Proteobacteria	Moist	rs4795754	G	A	-0.434858	0.0396835	0.358144	FALSE	33248157	0.00463487	0.0268249	5.10492e-06	0.0930318	TRUE
DISORDSKINAPPENDIX	Phylum Proteobacteria	Moist	rs2200706	T	C	-0.713618	-0.0540488	0.124621	FALSE	3631924	0.00549263	0.0389071	9.85944e-06	0.157737	TRUE
DISORDSKINAPPENDIX	Phylum Proteobacteria	Moist	rs2149820	T	C	-0.410968	0.0330101	0.605113	FALSE	68254133	0.00709147	0.0264917	5.90174e-06	0.0885419	TRUE
DISORDSKINAPPENDIX	Phylum Proteobacteria	Moist	rs501534	C	T	0.651773	-0.0329829	0.241555	FALSE	182630430	0.0090456	0.0299867	7.816e-07	0.128197	TRUE
DISORDSKINAPPENDIX	Phylum Proteobacteria	Moist	rs12089924	G	T	-0.676305	-0.0441403	0.103801	FALSE	234628451	0.00985867	0.0422166	5.31799e-06	0.144972	TRUE
DISORDSKINAPPENDIX	Phylum Proteobacteria	Moist	rs11256416	T	C	0.486233	0.0314001	0.160216	FALSE	6033396	0.0124404	0.0352623	5.86385e-06	0.104725	TRUE
ACNE	Asv001[P. Acnes]	Sebaceous	rs9852272	A	G	-0.418518	-0.0224546	0.398402	FALSE	82073886	0.0131719	0.0264078	4.73504e-06	0.089213	TRUE
ACNE	Asv001[P. Acnes]	Sebaceous	rs1073179	G	A	-0.425656	0.00879137	0.397791	FALSE	231889428	0.0246101	0.0263133	4.38405e-06	0.0904012	TRUE
ACNE	Asv001[P. Acnes]	Sebaceous	rs113237157	G	A	0.877454	0.00507354	0.118113	FALSE	8735006	0.0300234	0.0406614	2.80183e-06	0.182494	TRUE
ACNE	Asv001[P. Acnes]	Sebaceous	rs56395519	G	C	0.77314	-0.000168251	0.170798	FALSE	66523214	0.0332033	0.034421	2.32389e-08	0.133436	TRUE
ACNE	Asv001[P. Acnes]	Sebaceous	rs78571798	C	A	0.74771	-0.0965058	0.10834	FALSE	19331216	0.0281028	0.0439492	2.78412e-06	0.155313	TRUE
ACNE	Asv001[P. Acnes]	Sebaceous	rs77808814	G	A	0.873734	-0.124163	0.0703409	FALSE	32753901	0.0200115	0.0533776	8.66498e-06	0.191947	TRUE
ACNE	Asv001[P. Acnes]	Sebaceous	rs58970099	C	A	0.654601	-0.0993917	0.106841	FALSE	119084810	0.0452825	0.0496456	7.58262e-06	0.142833	TRUE
ACNE	Asv001[P. Acnes]	Sebaceous	rs12630457	A	C	0.50834	0.0808396	0.187293	FALSE	139989962	0.0215491	0.0351748	5.01689e-06	0.108709	TRUE
ACNE	Asv001[P. Acnes]	Sebaceous	rs11239049	C	T	0.396777	-0.0631015	0.623474	FALSE	44451793	0.0261951	0.0283818	9.35195e-06	0.0875385	TRUE
ACNE	Asv001[P. Acnes]	Sebaceous	rs12630457	A	C	0.50834	0.0781851	0.187491	FALSE	139989962	0.039863	0.0380433	5.01689e-06	0.108709	TRUE
ACNE	Asv001[P. Acnes]	Sebaceous	rs1031492	T	C	0.541075	-0.295877	0.200084	FALSE	15105660	0.0155171	0.122259	2.25871e-06	0.111353	TRUE
ACNE	Asv001[P. Acnes]	Sebaceous	rs78571798	C	A	0.74771	-0.0482252	0.108455	FALSE	19331216	0.0499448	0.0245993	2.78412e-06	0.155313	TRUE
ACNE	Asv001[P. Acnes]	Sebaceous	rs1519463	C	T	-0.408612	-0.0477819	0.424713	FALSE	221704797	0.0294307	0.0219417	2.49202e-06	0.0846075	TRUE
ACNE	Asv001[P. Acnes]	Sebaceous	rs17345752	T	A	-0.505565	-0.037111	0.194856	FALSE	107371609	0.0203016	0.0159911	9.04168e-06	0.111281	TRUE
ACNE	Asv001[P. Acnes]	Sebaceous	rs11239049	C	T	0.396777	-0.0262643	0.623317	FALSE	44451793	0.0436184	0.0130167	9.35195e-06	0.0875385	TRUE
ACNE	Asv008[Staphylococcus (unc.)]	Dry	rs1519463	C	T	-0.408612	-0.025231	0.424556	FALSE	221704797	0.0482225	0.0127726	2.49202e-06	0.0846075	TRUE
ACNE	Asv008[Staphylococcus (unc.)]	Dry	rs78571798	C	A	0.74771	0.250706	0.108427	FALSE	19331216	0.0292631	0.115007	2.78412e-06	0.155313	TRUE
ACNE	Asv008[Staphylococcus (unc.)]	Dry	rs11239049	C	T	0.396777	0.17491	0.623291	FALSE	44451793	0.0100007	0.0679051	9.35195e-06	0.0875385	TRUE
ACNE	Asv008[Staphylococcus (unc.)]	Dry	rs77808814	G	A	0.873734	0.313486	0.070171	FALSE	32753901	0.00193642	0.101131	8.66498e-06	0.191947	TRUE
ACNE	Asv008[Staphylococcus (unc.)]	Sebaceous	rs7663600	A	G	0.594306	0.380154	0.119582	FALSE	4785000	0.0062523	0.139034	2.09484e-07	0.111031	TRUE
ACNE	Asv008[Staphylococcus (unc.)]	Sebaceous	rs58970099	C	A	0.654601	-0.057892	0.106811	FALSE	119084810	0.0174225	0.0243483	7.58262e-06	0.142833	TRUE
ACNE	Asv008[Staphylococcus (unc.)]	Sebaceous	rs1519463	C	T	-0.408612	-0.0304244	0.424656	FALSE	221704797	0.0440595	0.01511	2.49202e-06	0.0846075	TRUE
ACNE	Asv063[Finegoldia (unc.)]	Dry	rs11239049	C	T	0.396777	0.0298658	0.623266	FALSE	44451793	0.000531031	0.0154419	9.35195e-06	0.0875385	TRUE
ACNE	Asv063[Finegoldia (unc.)]	Dry	rs78571798	C	A	0.74771	0.0395239	0.108461	FALSE	19331216	0.00103681	0.0242885	2.78412e-06	0.155313	TRUE
ACNE	Asv063[Finegoldia (unc.)]	Dry	rs709317	G	A	-0.603874	-0.0371822	0.905388	FALSE	53575583	0.00146174	0.0255868	4.27403e-06	0.128096	TRUE
ACNE	Asv063[Finegoldia (unc.)]	Dry	rs13061767	T	C	0.528925	0.0264712	0.192047	FALSE	140095784	0.00166543	0.0191349	8.07178e-06	0.115831	TRUE
ACNE	Asv070[Veillonella (unc.)]	Dry	rs77808814	G	A	0.873734	-0.0304577	0.0701404	FALSE	32753901	0.00298525	0.0292975	8.66498e-06	0.191947	TRUE
ACNE	Asv070[Veillonella (unc.)]	Dry	rs1031492	T	C	0.541075	-0.0140421	0.200073	FALSE	15105660	0.00453201	0.0187206	2.25871e-06	0.111353	TRUE
ACNE	Asv070[Veillonella (unc.)]	Dry	rs12630457	A	C	0.50834	-0.00438074	0.187472	FALSE	139989962	0.00818822	0.0191248	5.01689e-06	0.108709	TRUE
ACNE	Asv070[Veillonella (unc.)]	Dry	rs7663600	A	G	0.594306	0.00311105	0.119574	FALSE	4785000	0.00892617	0.0230459	2.09484e-07	0.111031	TRUE
ACNE	Asv070[Veillonella (unc.)]	Dry	rs17345752	T	A	-0.505565	-0.000280489	0.194926	FALSE	107371609	0.00988147	0.0188796	9.04168e-06	0.111281	TRUE
ACNE	Asv070[Veillonella (unc.)]	Dry	rs78571798	C	A	0.74771	0.0457209	0.108587	FALSE	19331216	0.000259192	0.0183997	2.78412e-06	0.155313	TRUE
ACNE	Asv070[Veillonella (unc.)]	Dry	rs1031492	T	C	0.541075	0.032272	0.200706	FALSE	15105660	0.000455092	0.0141698	2.25871e-06	0.111353	TRUE
ACNE	Asv086[A. Johnsonii]	Dry	rs17345752	T	A	-0.505565	-0.0267646	0.194668	FALSE	107371609	0.00121535	0.014273	9.04168e-06	0.111281	TRUE
ACNE	Asv086[A. Johnsonii]	Dry	rs58970099	C	A	0.654601	0.0313212	0.106392	FALSE	119084810	0.00176897	0.0183849	7.58262e-06	0.142833	TRUE
ACNE	Asv086[A. Johnsonii]	Dry	rs709317	G	A	-0.603874	-0.0192064	0.905637	FALSE	53575583	0.00640648	0.0193264	4.27403e-06	0.128096	TRUE
ACNE	Asv086[A. Johnsonii]	Dry	rs7663600	A	G	0.594306	0.0157675	0.119502	FALSE	4785000	0.00733782	0.0174746	2.09484e-07	0.111031	TRUE
ACNE	Asv086[A. Johnsonii]	Dry	rs12630457	A	C	0.50834	0.010439	0.187373	FALSE	139989962	0.009431	0.0144995	5.01689e-06	0.108709	TRUE
ACNE	Asv086[A. Johnsonii]	Dry	rs77808814	G	A	0.873734	0.0145383	0.0701729	FALSE	32753901	0.0102484	0.0221934	8.66498e-06	0.191947	TRUE
ACNE	Genus Bacteroides	Moist	rs1519463	C	T	-0.408612	0.0026408	0.423913	FALSE	221704797	0.0163524	0.0114515	2.49202e-06	0.0846075	TRUE
ACNE	Genus Bacteroides	Moist	rs11239049	C	T	0.396777	0.000555934	0.622302	FALSE	44451793	0.0192412	0.0116874	9.35195e-06	0.0875385	TRUE
ACNE	Genus Bacteroides	Moist	rs13061767	T	C	0.528925	0.000381464	0.191989	FALSE	140095784	0.0195797	0.0144821	8.07178e-06	0.115831	TRUE
ACNE	Genus Bacteroides	Moist	rs78571798	C	A	0.74771	-0.100534	0.10827	FALSE	19331216	0.000468015	0.0427614	2.78412e-06	0.155313	TRUE
ACNE	Genus Bacteroides	Moist	rs17345752	T	A	-0.505565	-0.0645112	0.194689	FALSE	107371609	0.00125924	0.0329676	9.04168e-06	0.111281	TRUE
ACNE	Genus Chryseobacterium	Moist	rs709317	G	A	-0.603874	-0.0519108	0.905736	FALSE	53575583	0.00614787	0.044738	4.27403e-06	0.128096	TRUE
ACNE	Genus Chryseobacterium	Moist	rs7663600	A	G	0.594306	-0.0318058	0.119368	FALSE	4785000	0.010807	0.0405016	2.09484e-07	0.111031	TRUE
ACNE	Genus Chryseobacterium	Moist	rs11239049	C	T	0.396777	0.0203681	0.62223	FALSE	44451793	0.011284	0.027044	9.35195e-06	0.0875385	TRUE
ACNE	Genus Chryseobacterium	Moist	rs77808814	G	A	0.873734	0.0364641	0.0701336	FALSE	32753901	0.0119273	0.0512864	8.66498e-06	0.191947	TRUE
ACNE	Genus Chryseobacterium	Moist	rs1519463	C	T	-0.408612	0.0131712	0.423792	FALSE	221704797	0.0154739	0.0264837	2.49202e-06	0.0846075	TRUE
ACNE	Genus Chryseobacterium	Moist	rs13061767	T	C	0.528925	-0.0151121	0.191897	FALSE	140095784	0.0162813	0.033432	8.07178e-06	0.115831	TRUE
ACNE	Genus Chryseobacterium	Moist	rs1031492	T	C	0.541075	-0.0147295	0.200443	FALSE	15105660	0.0163497	0.0328618	2.25871e-06	0.111353	TRUE
ACNE	Genus Chryseobacterium	Moist	rs12630457	A	C	0.50834	-0.00817057	0.187266	FALSE	139989962	0.0201935	0.0335762	5.01689e-06	0.108709	TRUE
ACNE	Genus Chryseobacterium	Moist	rs58970099	C	A	0.654601	0.00599847	0.106123	FALSE	119084810	0.0221895	0.0424321	7.58262e-06	0.142833	TRUE
ACNE	Genus Chryseobacterium	Moist	rs58970099	C	A	0.654601	-0.13481	0.105988	FALSE	119084810	5.47987e-05	0.0428241	7.58262e-06	0.142833	TRUE
ACNE	Genus Chryseobacterium	Moist	rs7663600	A	G	0.594306	0.0733532	0.119496	FALSE	4785000	0.0021296	0.0395869	2.09484e-07	0.111031	TRUE
ACNE	Genus Chryseobacterium	Moist	rs77808814	G	A	0.873734	0.0917923	0.0701753	FALSE	32753901	0.0022625	0.0502742	8.66498e-06	0.191947	TRUE
ACNE	Genus Micrococcus	Moist	rs12630457	A	C	0.50834	-0.0286189	0.187224	FALSE	139989962	0.0128571	0.0329932	5.01689e-06	0.108709	TRUE
ACNE	Genus Micrococcus	Moist	rs11239049	C	T	0.396777	0.017451	0.622247	FALSE	44451793	0.017032	0.0265479	9.35195e-06	0.0875385	TRUE
ACNE	Genus Micrococcus	Moist	rs709317	G	A	-0.603874	0.0272769	0.905801	FALSE	53575583	0.0178109	0.0438948	4.27403e-06	0.128096	TRUE
ACNE	Genus Micrococcus	Moist	rs13061767	T	C	0.528925	-0.0184047	0.191886	FALSE	140095784	0.0191935	0.0328936	8.07178e-06	0.115831	TRUE
ACNE	Genus Micrococcus	Moist	rs17345752	T	A	-0.505565	-0.014235	0.19477	FALSE	107371609	0.0220246	0.032434	9.04168e-06	0.111281	TRUE
ACNE	Genus Micrococcus	Moist	rs1031492	T	C	0.541075	0.0106526	0.200483	FALSE	15105660	0.0247019	0.0322362	2.25871e-06	0.111353	TRUE
ACNE	Genus Micrococcus	Moist	rs78571798	C	A	0.74771	0.0125551	0.108359	FALSE	19331216	0.0255341	0.0421908	2.78412e-06	0.155313	TRUE
ACNE	Genus Staphylococcus	Sebaceous	rs1519463	C	T	-0.408612	-0.000840949	0.423786	FALSE	221704797	0.0324733	0.0260024	2.49202e-06	0.0846075	TRUE
ACNE	Genus Staphylococcus	Sebaceous	rs12369866	G	T	0.702076	-0.216579	0.0719705	FALSE	89970087	0.0170169	0.0907574	1.09158e-06	0.139458	TRUE
ACNE	Genus Staphylococcus	Sebaceous	rs156472	G	T	-0.498894	-0.288043	0.483974	FALSE	8738175	0.0196603	0.123477	2.58997e-06	0.10298	TRUE
ACNE	Genus Staphylococcus	Sebaceous	rs156472	G	T	-0.498894	-0.21352	0.484004	FALSE	8738175	0.0307128	0.0988162	2.58997e-06	0.10298	TRUE
ACNE	Genus Staphylococcus	Sebaceous	rs7649275	A	G	0.626393	0.0261582	0.913578	FALSE	53724676	0.003256	0.0266102	6.30175e-06	0.134894	TRUE
ACNE	Genus Staphylococcus	Sebaceous	rs156472	G	T	-0.498894	-0.00797457	0.483977	FALSE	8738175	0.0059746	0.0151018	2.58997e-06	0.10298	TRUE
ACNE	Genus Staphylococcus	Sebaceous	rs12369866	G	T	0.702076	0.00569493	0.0720128	FALSE	89970087	0.00844006	0.0289418	1.09158e-06	0.139458	TRUE
ACNE	Genus Staphylococcus	Sebaceous	rs12369866	G	T	0.702076	-0.0175418	0.0721807	FALSE	89970087	0.00848804	0.0219599	1.09158e-06	0.139458	TRUE
ACNE	Genus Staphylococcus	Sebaceous	rs156472	G	T	-0.498894	-0.00563297	0.483033	FALSE	8738175	0.0124381	0.0114224	2.58997e-06	0.10298	TRUE
ACNE	Genus Staphylococcus	Sebaceous	rs7649275	A	G	0.626393	-0.00151333	0.912954	FALSE	53724676	0.0187981	0.0200732	6.30175e-06	0.134894	TRUE
ACNE	Genus Staphylococcus	Sebaceous	rs156472	G	T	-0.498894	0.0109477	0.482888	FALSE	8738175	0.0169821	0.0264794	2.58997e-06	0.10298	TRUE
ACNE	Genus Staphylococcus	Sebaceous	rs12369866	G	T	0.702076	-0.0131835	0.0722625	FALSE	89970087	0.0198885	0.0508774	1.09158e-06	0.139458	TRUE
ACNE	Class Alphaproteobacteria	Dry	rs7649275	A	G	0.626393	0.0105873	0.913004	FALSE	53724676	0.0204932	0.0464566	6.30175e-06	0.134894	TRUE
ACNE	Class Alphaproteobacteria	Dry	rs7649275	A	G	0.626393	0.067346	0.91305	FALSE	53724676	0.00469303	0.0457249	6.30175e-06	0.134894	TRUE
ACNE	Class Alphaproteobacteria	Dry	rs156472	G	T	-0.498894	-0.0187419	0.482837	FALSE	8738175	0.0156577	0.0259253	2.58997e-06	0.10298	TRUE
ACNE	Class Alphaproteobacteria	Dry	rs12369866	G	T	0.702076	-0.0190584	0.0722638	FALSE	89970087	0.0234002	0.0498112	1.09158e-06	0.139458	TRUE
ACNE	Class Alphaproteobacteria	Dry	rs9862186	G	A	-0.619083	0.0814834	0.326937	FALSE	46462736	0.000146103	0.0285988	8.09e-06	0.133417	TRUE
ACNE	Class Alphaproteobacteria	Dry	rs6924266	T	C	0.580242	-0.0705931	0.639188	FALSE	25505389	0.000420203	0.0282971	9.86e-06	0.126337	TRUE
ACNE	Class Alphaproteobacteria	Dry	rs17121444	T	C	1.36287	-0.115319	0.0396719	FALSE	85655147	0.00334967	0.0702105	2.65e-06	0.277974	TRUE
ACNE	Class Alphaproteobacteria	Dry	rs7166591	C	A	0.948258	0.0641428	0.0955005	FALSE	27493709	0.00580873	0.0472111	9e-07	0.184172	TRUE
ACNE	Class Alphaproteobacteria	Dry	rs11216799	A	G	0.913914	0.0655944	0.0866447	FALSE	118175855	0.0058922	0.0485604	5.05e-06	0.19231	TRUE
ACNE	Class Bacilli	Sebaceous	rs10044384	G	C	0.665298	0.0420409	0.155833	FALSE	25481466	0.0088751	0.0378157	5.24e-06	0.140252	TRUE
ACNE	Class Bacilli	Sebaceous	rs7011874	G	A	-0.904493	-0.048292	0.928572	FALSE	39719784	0.0119249	0.0525103	3.09e-07	0.167957	TRUE
ACNE	Class Bacilli	Sebaceous	rs73207765	T	C	0.953736	0.0324346	0.082993	FALSE	62120389	0.0170847	0.0495269	7.61e-06	0.204885	TRUE
ACNE	Class Bacilli	Sebaceous	rs1324370	T	C	0.534658	-0.0209888	0.765675	FALSE	81548377	0.0171608	0.0322238	7.02e-06	0.114387	TRUE
ACNE	Class Betaproteobacteria	Moist	rs12987374	T	C	0.555775	-0.0169646	0.539199	FALSE	133598730	0.0178078	0.0272938	2.61e-06	0.11327	TRUE
ACNE	Class Betaproteobacteria	Moist	rs58560146	T	A	0.93853	0.0316427	0.0659146	FALSE	29015307	0.0187238	0.0545286	3.73e-06	0.194571	TRUE
ACNE	Class Betaproteobacteria	Moist	rs17841195	G	A	0.793147	0.0306904	0.0575307	FALSE	83510805	0.0200004	0.0585267	6.23e-06	0.168662	TRUE
ACNE	Class Betaproteobacteria	Moist	rs58084348	T	C	0.94111	-0.0157951	0.102105	FALSE	123549455	0.0241625	0.0448787	3.67e-07	0.17598	TRUE
ACNE	Class Betaproteobacteria	Moist	rs228568	G	A	0.60875	-0.0094676	0.378414	FALSE	79173424	0.0245194	0.0280347	4.96e-06	0.127986	TRUE
ACNE	Class Betaproteobacteria	Moist	rs72751000	T	G	1.05251	0.0189191	0.0504199	FALSE	26066067	0.0253923	0.0624068	1.56e-07	0.190235	TRUE
ACNE	Class Betaproteobacteria	Moist	rs77890972	T	C	1.5	0.00997066	0.0454408	FALSE	133835242	0.0293395	0.0661467	6.31e-06	0.319175	TRUE
ACNE	Class Betaproteobacteria	Moist	rs72713460	T	G	0.630729	0.00131595	0.2524	FALSE	54830325	0.032216	0.0313148	4.62e-06	0.132139	TRUE
ACNE	Class Betaproteobacteria	Moist	rs58084348	T	C	0.94111	-0.423628	0.101709	FALSE	123549455	0.000469332	0.168102	3.66525e-07	0.17598	TRUE
ACNE	Class Betaproteobacteria	Sebaceous	rs73207765	T	C	0.953736	0.268342	0.0828036	FALSE	62120389	0.00611916	0.187772	7.60907e-06	0.204885	TRUE
ACNE	Class Betaproteobacteria	Sebaceous	rs72751000	T	G	1.05251	-0.335931	0.050088	FALSE	26066067	0.00622196	0.236537	1.56363e-07	0.190235	TRUE
ACNE	Class Betaproteobacteria	Sebaceous	rs17841195	G	A	0.793147	0.28481	0.0577761	FALSE	83510805	0.00777868	0.219511	6.23052e-06	0.168662	TRUE
ACNE	Order Lactobacillales	Dry	rs9862186	G	A	-0.619083	0.100584	0.326914	FALSE	46462736	0.0141578	0.108509	8.0934e-06	0.133417	TRUE
ACNE	Order Lactobacillales	Dry	rs7011874	G	A	-0.904493	0.171665	0.928288	FALSE	39719784	0.0153471	0.197058	3.08854e-07	0.167957	TRUE
ACNE	Order Lactobacillales	Dry	rs72713460	T	G	0.630729	0.0877574	0.252905	FALSE	54830325	0.0180967	0.116794	4.62052e-06	0.132139	TRUE
ACNE	Order Lactobacillales	Dry	rs1324370	T	C	0.534658	0.0819589	0.76562	FALSE	81548377	0.0198528	0.120476	7.02303e-06	0.114387	TRUE
ACNE	Order Lactobacillales	Dry	rs228568	G	A	0.60875	0.0594022	0.378929	FALSE	79173424	0.0228336	0.1048	4.9636e-06	0.127986	TRUE
ACNE	Order Lactobacillales	Dry	rs6924266	T	C	0.580242	-0.0588524	0.638879	FALSE	25505389	0.0230767	0.105491	9.85864e-06	0.126337	TRUE
ACNE	Order Lactobacillales	Dry	rs77890972	T	C	1.5	0.119777	0.045195	FALSE	133835242	0.0249635	0.24441	6.30924e-06	0.319175	TRUE
ACNE	Order Lactobacillales	Dry	rs10044384	G	C	0.665298	-0.0562243	0.155616	FALSE	25481466	0.0276727	0.14184	5.23963e-06	0.140252	TRUE
ACNE	Order Lactobacillales	Dry	rs58560146	T	A	0.93853	0.0709888	0.0659121	FALSE	29015307	0.0290784	0.203307	3.72719e-06	0.194571	TRUE
ACNE	Phylum Firmicutes	Dry	rs12987374	T	C	0.555775	0.027755	0.539829	FALSE	133598730	0.0314405	0.102232	2.60675e-06	0.11327	TRUE
ACNE	Phylum Firmicutes	Dry	rs17121444	T	C	1.36287	-0.0297081	0.0394959	FALSE	85655147	0.036373	0.260846	2.6497e-06	0.277974	TRUE
ACNE	Phylum Firmicutes	Dry	rs7166591	C	A	0.948258	-0.0128523	0.0949107	FALSE	27493709	0.0376953	0.177821	8.99692e-07	0.184172	TRUE
ACNE	Phylum Firmicutes	Dry	rs11216799	A	G	0.913914	-0.00219059	0.0868543	FALSE	118175855	0.039609	0.178821	5.05033e-06	0.19231	TRUE
ACNE	Phylum Firmicutes	Dry	rs4243669	C	A	-0.575347	0.0486232	0.74979	FALSE	84011140	0.0040579	0.03142	1.78e-06	0.117064	TRUE
ACNE	Phylum Firmicutes	Dry	rs9386539	T	C	-0.649783	-0.0682005	0.0716155	FALSE	106425864	0.00648587	0.0525768	8.06e-06	0.141995	TRUE
ACNE	Phylum Firmicutes	Dry	rs6495618	A	G	0.455013	-0.0358939	0.407029	FALSE	81820286	0.0066293	0.0279384	5.49e-06	0.0975648	TRUE
ACNE	Phylum Firmicutes	Dry	rs2490032	A	G	0.586094	0.048465	0.86976	FALSE	3869748	0.0077372	0.040559	1.3e-06	0.11764	TRUE
ACNE	Phylum Firmicutes	Dry	rs11961215	T	C	0.722975	-0.0478655	0.0798629	FALSE	44563866	0.0115059	0.0507058	6.94e-06	0.156816	TRUE
ALOPECANDRO	Asv006[S. Hominis]	Moist	rs118098615	C	G	0.87008	-0.0609084	0.0427657	FALSE	82817741	0.0121612	0.0672137	4.78e-06	0.185313	TRUE
ALOPECANDRO	Asv006[S. Hominis]	Moist	rs4890487	A	C	-0.436971	-0.0239205	0.406765	FALSE	44650207	0.0128751	0.0276081	9.35e-06	0.0962071	TRUE
ALOPECANDRO	Asv006[S. Hominis]	Moist	rs398055	T	C	0.419569	-0.0152241	0.308535	FALSE	114221819	0.0202967	0.0297551	3.86e-06	0.0884523	TRUE
ALOPECANDRO	Asv006[S. Hominis]	Moist	rs4463024	C	T	-0.711018	0.00601596	0.135191	FALSE	155143614	0.029316	0.0396753	8.31e-06	0.155618	TRUE
ALOPECANDRO	Asv006[S. Hominis]	Moist	rs79748757	G	A	0.89562	-0.00498196	0.177123	FALSE	9063424	0.0296527	0.0358841	1.86e-06	0.1826	TRUE
ALOPECANDRO	Asv006[S. Hominis]	Moist	rs79748757	G	A	0.89562	-0.30402	0.17728	FALSE	9063424	0.000939248	0.134195	1.86024e-06	0.1826	TRUE
ALOPECANDRO	Asv006[S. Hominis]	Moist	rs6495618	A	G	0.455013	-0.127225	0.40671	FALSE	81820286	0.0089436	0.104537	5.49397e-06	0.0975649	TRUE
ALOPECANDRO	Asv006[S. Hominis]	Moist	rs4890487	A	C	-0.436971	-0.122022	0.40594	FALSE	44650207	0.00954372	0.103539	9.34608e-06	0.0962071	TRUE
ALOPECANDRO	Asv042[Acinetobacter (unc.)]	Dry	rs4463024	C	T	-0.711018	-0.110437	0.134938	FALSE	155143614	0.0186265	0.151376	8.31399e-06	0.155618	TRUE
ALOPECANDRO	Asv042[Acinetobacter (unc.)]	Dry	rs398055	T	C	0.419569	0.0522473	0.308183	FALSE	114221819	0.0255754	0.111506	3.85693e-06	0.0884523	TRUE
ALOPECANDRO	Asv042[Acinetobacter (unc.)]	Dry	rs4243669	C	A	-0.575347	-0.0386306	0.750081	FALSE	84011140	0.0296521	0.117017	1.77699e-06	0.117064	TRUE
ALOPECANDRO	Asv042[Acinetobacter (unc.)]	Dry	rs11961215	T	C	0.722975	-0.0492151	0.0798147	FALSE	44563866	0.0318212	0.18992	6.94351e-06	0.156816	TRUE
ALOPECANDRO	Asv042[Acinetobacter (unc.)]	Dry	rs9386539	T	C	-0.649783	-0.042176	0.0711975	FALSE	106425864	0.0331928	0.19623	8.0619e-06	0.141995	TRUE
ALOPECANDRO	Asv042[Acinetobacter (unc.)]	Dry	rs118098615	C	G	0.87008	-0.0393069	0.042622	FALSE	82817741	0.0350292	0.251347	4.78009e-06	0.185313	TRUE
ALOPECANDRO	Asv042[Acinetobacter (unc.)]	Dry	rs2490032	A	G	0.586094	0.00637702	0.870351	FALSE	3869748	0.0386616	0.152016	1.30377e-06	0.11764	TRUE
ALOPECANDRO	Asv042[Acinetobacter (unc.)]	Dry	rs56095407	T	C	0.717104	-0.0945732	0.0751759	FALSE	52832483	0.00232503	0.0521487	2.57e-06	0.148767	TRUE
ALOPECANDRO	Asv042[Acinetobacter (unc.)]	Dry	rs9834904	T	C	0.578467	-0.0576952	0.150478	FALSE	6058575	0.00434043	0.0381264	4.26e-06	0.122853	TRUE
ALOPECANDRO	Family Streptococcaceae	Dry	rs59106012	C	T	-0.425671	-0.0115272	0.312385	FALSE	124637068	0.0231297	0.0292879	7.84e-06	0.09313	TRUE
ALOPECANDRO	Family Streptococcaceae	Dry	rs2060907	A	G	0.626361	-0.0182825	0.0963461	FALSE	29184156	0.0232446	0.0470086	5.98e-07	0.122042	TRUE
ALOPECANDRO	Family Streptococcaceae	Dry	rs59106012	C	T	-0.425671	-0.0870054	0.312722	FALSE	124637068	0.0171193	0.109765	7.84265e-06	0.09313	TRUE
ALOPECANDRO	Family Streptococcaceae	Dry	rs56095407	T	C	0.717104	-0.145131	0.0753663	FALSE	52832483	0.0183017	0.195358	2.56812e-06	0.148767	TRUE
ALOPECANDRO	Family Streptococcaceae	Dry	rs9834904	T	C	0.578467	0.0777526	0.150356	FALSE	6058575	0.0234284	0.142649	4.25586e-06	0.122853	TRUE
ALOPECANDRO	Class Gammaproteobacteria	Sebaceous	rs2060907	A	G	0.626361	0.0826814	0.0962134	FALSE	29184156	0.0253897	0.174042	5.97698e-07	0.122042	TRUE
ALOPECANDRO	Class Gammaproteobacteria	Sebaceous	rs7751	C	T	-0.558338	0.0670325	0.288217	FALSE	17628665	0.0256366	0.0300369	7.83786e-06	0.120454	TRUE
ALOPECANDRO	Class Gammaproteobacteria	Sebaceous	rs11235232	G	A	-0.658933	0.140018	0.18538	FALSE	87615970	0.0466155	0.0703687	6.49034e-06	0.1408	TRUE
ALOPECANDRO	Class Gammaproteobacteria	Sebaceous	rs2268390	C	T	0.642972	0.0818178	0.771937	FALSE	109197472	0.0400415	0.0398465	2.17566e-06	0.130334	TRUE
ALOPECANDRO	Class Gammaproteobacteria	Sebaceous	rs2268390	C	T	0.642972	0.0763439	0.771952	FALSE	109197472	0.0187387	0.0324773	2.17566e-06	0.130334	TRUE
ALOPECANDRO	Class Gammaproteobacteria	Sebaceous	rs149893292	A	G	0.881281	-0.345081	0.140018	FALSE	186248205	0.0474624	0.174095	7.98076e-06	0.1903	TRUE
ALOPECANDRO	Phylum Proteobacteria	Sebaceous	rs11858403	C	G	-0.548239	-0.0810247	0.506149	FALSE	70117849	0.00761202	0.0303599	5.92983e-06	0.116617	TRUE
ALOPECANDRO	Phylum Proteobacteria	Sebaceous	rs7751	C	T	-0.558338	-0.0838598	0.288341	FALSE	17628665	0.00615616	0.030613	7.83786e-06	0.120454	TRUE
ALOPECANDRO	Phylum Proteobacteria	Sebaceous	rs112384482	G	C	-1.06141	-0.0935892	0.109466	FALSE	24008950	0.0483103	0.0473959	3.0456e-06	0.218566	TRUE
ALOPECANDRO	Phylum Proteobacteria	Sebaceous	rs7751	C	T	-0.558338	-0.0296506	0.288274	FALSE	17628665	0.0334857	0.0139453	7.83786e-06	0.120454	TRUE
ALOPECAREATA	Asv005[P. Granulosum]	Sebaceous	rs6765913	G	A	0.637569	0.035345	0.152467	FALSE	194473367	0.044793	0.0176144	9.903e-06	0.139221	TRUE
ALOPECAREATA	Asv005[P. Granulosum]	Sebaceous	rs17562195	C	T	1.41257	0.147828	0.0752864	FALSE	197459299	0.00805341	0.055788	1.08496e-06	0.277507	TRUE
ALOPECAREATA	Asv005[P. Granulosum]	Sebaceous	rs4705804	C	T	-0.57201	0.0657348	0.698769	FALSE	113223073	0.0486038	0.0333332	8.6098e-06	0.124001	TRUE
ALOPECAREATA	Asv005[P. Granulosum]	Sebaceous	rs6456465	A	G	0.831478	0.0214834	0.850878	FALSE	22026688	0.0412373	0.0105252	5.95987e-06	0.176909	TRUE
ALOPECAREATA	Asv005[P. Granulosum]	Sebaceous	rs7751	C	T	-0.558338	-0.0530093	0.288125	FALSE	17628665	0.0440109	0.0263206	7.83786e-06	0.120454	TRUE
ALOPECAREATA	Asv005[P. Granulosum]	Sebaceous	rs17562195	C	T	1.41257	0.142996	0.0752219	FALSE	197459299	0.00636869	0.0524147	1.08496e-06	0.277507	TRUE
ALOPECAREATA	Asv010[Staphylococcus (unc.)]	Sebaceous	rs6765913	G	A	0.637569	0.086302	0.152471	FALSE	194473367	0.032184	0.0402882	9.903e-06	0.139221	TRUE
ALOPECAREATA	Asv010[Staphylococcus (unc.)]	Sebaceous	rs6456465	A	G	0.831478	0.0528775	0.850878	FALSE	22026688	0.00316672	0.0179181	5.95987e-06	0.176909	TRUE
ALOPECAREATA	Asv010[Staphylococcus (unc.)]	Sebaceous	rs2268390	C	T	0.642972	-0.0363327	0.772074	FALSE	109197472	0.0155396	0.0150163	2.17566e-06	0.130334	TRUE
ALOPECAREATA	Asv010[Staphylococcus (unc.)]	Sebaceous	rs112384482	G	C	-1.06141	0.346551	0.109463	FALSE	24008950	0.0397585	0.168535	3.0456e-06	0.218566	TRUE
ALOPECAREATA	Asv010[Staphylococcus (unc.)]	Sebaceous	rs6456465	A	G	0.831478	0.0683384	0.850854	FALSE	22026688	0.00136144	0.0213377	5.95987e-06	0.176909	TRUE
ALOPECAREATA	Asv010[Staphylococcus (unc.)]	Sebaceous	rs2268390	C	T	0.642972	-0.0394507	0.772139	FALSE	109197472	0.027067	0.0178465	2.17566e-06	0.130334	TRUE
ALOPECAREATA	Asv010[Staphylococcus (unc.)]	Sebaceous	rs149893292	A	G	0.881281	-0.0364469	0.139995	FALSE	186248205	0.000909767	0.0215627	7.98076e-06	0.1903	TRUE
ALOPECAREATA	Asv015[Corynebacterium (unc.)]	Moist	rs17562195	C	T	1.41257	-0.0419977	0.0752502	FALSE	197459299	0.00138197	0.0283282	1.08496e-06	0.277507	TRUE
ALOPECAREATA	Asv015[Corynebacterium (unc.)]	Moist	rs11858403	C	G	-0.548239	0.0154783	0.506129	FALSE	70117849	0.00304399	0.0150708	5.92983e-06	0.116617	TRUE
ALOPECAREATA	Asv015[Corynebacterium (unc.)]	Moist	rs11235232	G	A	-0.658933	0.0188539	0.185417	FALSE	87615970	0.00329381	0.0193302	6.49034e-06	0.1408	TRUE
ALOPECAREATA	Asv015[Corynebacterium (unc.)]	Moist	rs7751	C	T	-0.558338	0.0133949	0.28828	FALSE	17628665	0.00417851	0.0165338	7.83786e-06	0.120454	TRUE
ALOPECAREATA	Asv072[R. Mucilaginosa]	Dry	rs4705804	C	T	-0.57201	-0.0105978	0.698793	FALSE	113223073	0.00514782	0.016269	8.6098e-06	0.124001	TRUE
ALOPECAREATA	Asv072[R. Mucilaginosa]	Dry	rs112384482	G	C	-1.06141	0.0149273	0.10948	FALSE	24008950	0.00532249	0.0238999	3.0456e-06	0.218566	TRUE
ALOPECAREATA	Asv072[R. Mucilaginosa]	Dry	rs6765913	G	A	0.637569	0.003134	0.152497	FALSE	194473367	0.00880668	0.0208763	9.903e-06	0.139221	TRUE
ALOPECAREATA	Asv072[R. Mucilaginosa]	Dry	rs2268390	C	T	0.642972	0.0343248	0.771585	FALSE	109197472	0.00021926	0.0134931	2.17566e-06	0.130334	TRUE
ALOPECAREATA	Genus Acinetobacter	Moist	rs11858403	C	G	-0.548239	0.0243366	0.506413	FALSE	70117849	0.000662338	0.0114221	5.92983e-06	0.116617	TRUE
ALOPECAREATA	Genus Acinetobacter	Moist	rs112384482	G	C	-1.06141	0.0261945	0.109367	FALSE	24008950	0.00297058	0.0181309	3.0456e-06	0.218566	TRUE
ALOPECAREATA	Genus Acinetobacter	Moist	rs6765913	G	A	0.637569	0.0214863	0.152278	FALSE	194473367	0.00350864	0.0158576	9.903e-06	0.139221	TRUE
ALOPECAREATA	Genus Acinetobacter	Moist	rs149893292	A	G	0.881281	-0.0137488	0.140501	FALSE	186248205	0.00799678	0.0163305	7.98076e-06	0.1903	TRUE
ALOPECAREATA	Genus Corynebacterium	Dry	rs6456465	A	G	0.831478	-0.0127713	0.85098	FALSE	22026688	0.00842378	0.0158775	5.95987e-06	0.176909	TRUE
ALOPECAREATA	Genus Corynebacterium	Dry	rs4705804	C	T	-0.57201	0.00604209	0.699177	FALSE	113223073	0.0124875	0.0123395	8.6098e-06	0.124001	TRUE
ALOPECAREATA	Genus Corynebacterium	Dry	rs17562195	C	T	1.41257	-0.00785314	0.0752961	FALSE	197459299	0.0143094	0.0215439	1.08496e-06	0.277507	TRUE
ALOPECAREATA	Genus Corynebacterium	Dry	rs11235232	G	A	-0.658933	0.00421965	0.185801	FALSE	87615970	0.0154557	0.0146145	6.49034e-06	0.1408	TRUE
ALOPECAREATA	Genus Corynebacterium	Dry	rs7751	C	T	-0.558338	0.000687022	0.288221	FALSE	17628665	0.0191249	0.0125223	7.83786e-06	0.120454	TRUE
ALOPECAREATA	Genus Corynebacterium	Dry	rs11235232	G	A	-0.658933	-0.0502229	0.185672	FALSE	87615970	0.00346002	0.0338938	6.49034e-06	0.1408	TRUE
ALOPECAREATA	Genus Corynebacterium	Dry	rs7751	C	T	-0.558338	0.030672	0.288313	FALSE	17628665	0.0072244	0.0289257	7.83786e-06	0.120454	TRUE
ALOPECAREATA	Genus Corynebacterium	Dry	rs2268390	C	T	0.642972	0.0283338	0.771239	FALSE	109197472	0.00911093	0.031241	2.17566e-06	0.130334	TRUE
ALOPECAREATA	Genus Corynebacterium	Dry	rs4705804	C	T	-0.57201	0.0158009	0.699186	FALSE	113223073	0.014486	0.0285109	8.6098e-06	0.124001	TRUE
ALOPECAREATA	Genus Corynebacterium	Dry	rs11858403	C	G	-0.548239	0.00924529	0.506177	FALSE	70117849	0.0181619	0.0264288	5.92983e-06	0.116617	TRUE
ALOPECAREATA	Genus Corynebacterium	Dry	rs6456465	A	G	0.831478	-0.0118998	0.851116	FALSE	22026688	0.0186359	0.0366526	5.95987e-06	0.176909	TRUE
ALOPECAREATA	Genus Corynebacterium	Sebaceous	rs6765913	G	A	0.637569	-0.00958467	0.152119	FALSE	194473367	0.0198454	0.0366721	9.903e-06	0.139221	TRUE
ALOPECAREATA	Genus Corynebacterium	Sebaceous	rs17562195	C	T	1.41257	0.0103526	0.07535	FALSE	197459299	0.020868	0.049617	1.08496e-06	0.277507	TRUE
ALOPECAREATA	Genus Rothia	Dry	rs112384482	G	C	-1.06141	0.00430053	0.109266	FALSE	24008950	0.0229628	0.0420361	3.0456e-06	0.218566	TRUE
ALOPECAREATA	Genus Rothia	Dry	rs149893292	A	G	0.881281	0.00207686	0.140642	FALSE	186248205	0.0239033	0.0377548	7.98076e-06	0.1903	TRUE
ALOPECAREATA	Genus Rothia	Dry	rs112384482	G	C	-1.06141	-0.0454822	0.10921	FALSE	24008950	0.0090486	0.0413584	3.0456e-06	0.218566	TRUE
ALOPECAREATA	Genus Rothia	Dry	rs6456465	A	G	0.831478	0.0373627	0.851193	FALSE	22026688	0.0100522	0.0361662	5.95987e-06	0.176909	TRUE
ALOPECAREATA	Genus Rothia	Dry	rs17562195	C	T	1.41257	0.0462309	0.0753793	FALSE	197459299	0.0114201	0.0487136	1.08496e-06	0.277507	TRUE
ALOPECAREATA	Genus Staphylococcus	Moist	rs4705804	C	T	-0.57201	-0.0220148	0.699099	FALSE	113223073	0.0143631	0.0279494	8.6098e-06	0.124001	TRUE
ALOPECAREATA	Genus Staphylococcus	Moist	rs149893292	A	G	0.881281	-0.0245354	0.140593	FALSE	186248205	0.0170434	0.0373553	7.98076e-06	0.1903	TRUE
ALOPECAREATA	Genus Staphylococcus	Moist	rs2268390	C	T	0.642972	0.0170679	0.771203	FALSE	109197472	0.0192139	0.0305534	2.17566e-06	0.130334	TRUE
ALOPECAREATA	Genus Staphylococcus	Moist	rs6765913	G	A	0.637569	-0.017044	0.152085	FALSE	194473367	0.0212677	0.036229	9.903e-06	0.139221	TRUE
ALOPECAREATA	Genus Staphylococcus	Moist	rs7751	C	T	-0.558338	-0.0123043	0.288222	FALSE	17628665	0.0221711	0.0284271	7.83786e-06	0.120454	TRUE
ALOPECAREATA	Genus Staphylococcus	Moist	rs11235232	G	A	-0.658933	0.0141545	0.185767	FALSE	87615970	0.0223636	0.0333121	6.49034e-06	0.1408	TRUE
ALOPECAREATA	Genus Streptococcus	Dry	rs11858403	C	G	-0.548239	0.00967284	0.506161	FALSE	70117849	0.0236476	0.0259588	5.92983e-06	0.116617	TRUE
ALOPECAREATA	Genus Streptococcus	Dry	rs2664112	G	C	-0.475185	-0.0771662	0.711649	FALSE	9150644	0.0378504	0.0371623	9.40868e-07	0.0944665	TRUE
ALOPECAREATA	Genus Streptococcus	Dry	rs17247416	T	A	0.704806	-0.118354	0.0804674	FALSE	139454965	0.0198687	0.0508215	5.64828e-07	0.137197	TRUE
ALOPECAREATA	Genus Streptococcus	Dry	rs11676694	G	C	0.521955	-0.0831896	0.159574	FALSE	55377032	0.045568	0.0416078	9.64364e-07	0.103872	TRUE
ALOPECAREATA	Genus Streptococcus	Dry	rs7585985	C	T	-0.426263	0.0395985	0.381022	FALSE	45871469	0.0476179	0.0199915	9.52639e-06	0.0942786	TRUE
ALOPECAREATA	Genus Streptococcus	Dry	rs57055669	C	T	0.571116	0.0760127	0.111395	FALSE	11697767	0.00997447	0.0294999	8.85458e-06	0.12585	TRUE
ALOPECAREATA	Genus Streptococcus	Dry	rs2664112	G	C	-0.475185	0.0475177	0.711603	FALSE	9150644	0.0230229	0.0209048	9.40868e-07	0.0944665	TRUE
ALOPECAREATA	Genus Streptococcus	Dry	rs17247416	T	A	0.704806	-0.0339722	0.0805446	FALSE	139454965	0.0148744	0.0139492	5.64828e-07	0.137197	TRUE
ALOPECAREATA	Genus Streptococcus	Dry	rs7650739	C	T	-0.390548	0.180823	0.516883	FALSE	33828221	0.0105838	0.0707402	6.05704e-06	0.0844576	TRUE
ALOPECAREATA	Genus Streptococcus	Dry	rs6838099	C	T	-0.502976	0.210639	0.807366	FALSE	35135981	0.0118288	0.0836795	6.76371e-06	0.10936	TRUE
ALOPECAREATA	Genus Streptococcus	Dry	rs7585985	C	T	-0.426263	-0.1711	0.380835	FALSE	45871469	0.0118913	0.0680223	9.52639e-06	0.0942786	TRUE
ALOPECAREATA	Class Betaproteobacteria	Dry	rs72862969	G	A	-0.74038	-0.359019	0.0358977	FALSE	33810367	0.0218555	0.15658	1.661e-06	0.150822	TRUE
ALOPECAREATA	Class Betaproteobacteria	Dry	rs7650739	C	T	-0.390548	0.0607027	0.516579	FALSE	33828221	0.0361785	0.0289762	6.05704e-06	0.0844576	TRUE
ALOPECAREATA	Class Betaproteobacteria	Dry	rs7585985	C	T	-0.426263	0.030404	0.38102	FALSE	45871469	0.0194908	0.0130154	9.52639e-06	0.0942786	TRUE
ALOPECAREATA	Class Betaproteobacteria	Dry	rs7585985	C	T	-0.426263	0.0336618	0.38097	FALSE	45871469	0.0293609	0.0154511	9.52639e-06	0.0942786	TRUE
ALOPECAREATA	Class Gammaproteobacteria	Sebaceous	rs6838099	C	T	-0.502976	-0.0276901	0.80735	FALSE	35135981	0.00143717	0.0189387	6.76371e-06	0.10936	TRUE
ALOPECAREATA	Class Gammaproteobacteria	Sebaceous	rs17247416	T	A	0.704806	-0.0335593	0.080552	FALSE	139454965	0.0022714	0.0277864	5.64828e-07	0.137197	TRUE
ALOPECAREATA	Class Gammaproteobacteria	Sebaceous	rs72862969	G	A	-0.74038	-0.0453851	0.0359837	FALSE	33810367	0.00259705	0.0402676	1.661e-06	0.150822	TRUE
ALOPECAREATA	Class Gammaproteobacteria	Sebaceous	rs57055669	C	T	0.571116	-0.0254098	0.111524	FALSE	11697767	0.00285188	0.0237756	8.85458e-06	0.12585	TRUE
ALOPECAREATA	Class Gammaproteobacteria	Sebaceous	rs3135570	G	T	0.55539	0.00452311	0.180194	FALSE	33825126	0.0081735	0.0195844	5.83692e-06	0.119889	TRUE
ALOPECAREATA	Class Gammaproteobacteria	Sebaceous	rs17761459	C	A	0.523856	-0.00386574	0.165292	FALSE	230273816	0.00847983	0.0201663	8.02878e-06	0.114871	TRUE
ALOPECAREATA	Class Gammaproteobacteria	Sebaceous	rs2664112	G	C	-0.475185	-0.00287415	0.711663	FALSE	9150644	0.00862891	0.016643	9.40868e-07	0.0944665	TRUE
HIDRADENITISSUP	Asv003[Staphylococcus (unc.)]	Dry	rs7650739	C	T	-0.390548	-0.00145232	0.516658	FALSE	33828221	0.00922953	0.0150165	6.05704e-06	0.0844576	TRUE
HIDRADENITISSUP	Asv003[Staphylococcus (unc.)]	Dry	rs11676694	G	C	0.521955	-7.09249e-05	0.159588	FALSE	55377032	0.00997232	0.0204445	9.64364e-07	0.103872	TRUE
HIDRADENITISSUP	Asv003[Staphylococcus (unc.)]	Dry	rs7650739	C	T	-0.390548	-0.0372229	0.517066	FALSE	33828221	2.14096e-05	0.0113786	6.05704e-06	0.0844576	TRUE
HIDRADENITISSUP	Asv003[Staphylococcus (unc.)]	Dry	rs7585985	C	T	-0.426263	0.0217767	0.38084	FALSE	45871469	0.00126433	0.0117226	9.52639e-06	0.0942786	TRUE
HIDRADENITISSUP	Asv003[Staphylococcus (unc.)]	Dry	rs2664112	G	C	-0.475185	-0.0196478	0.711007	FALSE	9150644	0.0023919	0.0126232	9.40868e-07	0.0944665	TRUE
HIDRADENITISSUP	Asv003[Staphylococcus (unc.)]	Dry	rs17761459	C	A	0.523856	-0.0199865	0.165219	FALSE	230273816	0.00381796	0.015281	8.02878e-06	0.114871	TRUE
HIDRADENITISSUP	Asv003[Staphylococcus (unc.)]	Dry	rs17247416	T	A	0.704806	-0.0153163	0.0801257	FALSE	139454965	0.00928134	0.0209192	5.64828e-07	0.137197	TRUE
HIDRADENITISSUP	Asv003[Staphylococcus (unc.)]	Dry	rs3135570	G	T	0.55539	-0.00938828	0.180268	FALSE	33825126	0.0105563	0.0148703	5.83692e-06	0.119889	TRUE
HIDRADENITISSUP	Asv003[Staphylococcus (unc.)]	Dry	rs11676694	G	C	0.521955	0.0081009	0.159543	FALSE	55377032	0.0120302	0.0155122	9.64364e-07	0.103872	TRUE
HIDRADENITISSUP	Asv003[Staphylococcus (unc.)]	Dry	rs6838099	C	T	-0.502976	0.00606827	0.807838	FALSE	35135981	0.013479	0.0144232	6.76371e-06	0.10936	TRUE
HIDRADENITISSUP	Asv006[S. Hominis]	Moist	rs72862969	G	A	-0.74038	0.011548	0.035809	FALSE	33810367	0.014096	0.0304817	1.661e-06	0.150822	TRUE
HIDRADENITISSUP	Asv006[S. Hominis]	Moist	rs57055669	C	T	0.571116	-0.00372154	0.111186	FALSE	11697767	0.0167175	0.0179632	8.85458e-06	0.12585	TRUE
HIDRADENITISSUP	Asv006[S. Hominis]	Moist	rs72862969	G	A	-0.74038	0.136209	0.0358014	FALSE	33810367	0.00127647	0.0698153	1.661e-06	0.150822	TRUE
HIDRADENITISSUP	Asv006[S. Hominis]	Moist	rs7650739	C	T	-0.390548	-0.0280412	0.517469	FALSE	33828221	0.007153	0.0262885	6.05704e-06	0.0844576	TRUE
HIDRADENITISSUP	Asv006[S. Hominis]	Moist	rs17247416	T	A	0.704806	0.0183934	0.0801169	FALSE	139454965	0.0175503	0.0480742	5.64828e-07	0.137197	TRUE
HIDRADENITISSUP	Asv006[S. Hominis]	Moist	rs11676694	G	C	0.521955	0.00747474	0.15949	FALSE	55377032	0.0208564	0.0357222	9.64364e-07	0.103872	TRUE
HIDRADENITISSUP	Asv006[S. Hominis]	Moist	rs2664112	G	C	-0.475185	-0.0056737	0.711233	FALSE	9150644	0.0211545	0.0292468	9.40868e-07	0.0944665	TRUE
HIDRADENITISSUP	Asv006[S. Hominis]	Moist	rs3135570	G	T	0.55539	0.00598926	0.180395	FALSE	33825126	0.0215552	0.0345073	5.83692e-06	0.119889	TRUE
HIDRADENITISSUP	Asv010[Staphylococcus (unc.)]	Moist	rs6838099	C	T	-0.502976	-0.00520702	0.807764	FALSE	35135981	0.0218927	0.0332908	6.76371e-06	0.10936	TRUE
HIDRADENITISSUP	Asv010[Staphylococcus (unc.)]	Moist	rs57055669	C	T	0.571116	-0.00552774	0.111139	FALSE	11697767	0.0223465	0.0414303	8.85458e-06	0.12585	TRUE
HIDRADENITISSUP	Asv010[Staphylococcus (unc.)]	Moist	rs7585985	C	T	-0.426263	0.00310206	0.380656	FALSE	45871469	0.0227232	0.0271175	9.52639e-06	0.0942786	TRUE
HIDRADENITISSUP	Asv010[Staphylococcus (unc.)]	Moist	rs17761459	C	A	0.523856	0.00252246	0.165382	FALSE	230273816	0.023576	0.0353037	8.02878e-06	0.114871	TRUE
HIDRADENITISSUP	Asv010[Staphylococcus (unc.)]	Moist	rs57055669	C	T	0.571116	0.112065	0.111273	FALSE	11697767	0.000150418	0.0394606	8.85458e-06	0.12585	TRUE
HIDRADENITISSUP	Asv016[Enhydrobacter (unc.)]	Dry	rs17761459	C	A	0.523856	-0.0600107	0.165277	FALSE	230273816	0.0028366	0.0348525	8.02878e-06	0.114871	TRUE
HIDRADENITISSUP	Asv016[Enhydrobacter (unc.)]	Dry	rs3135570	G	T	0.55539	0.034889	0.18046	FALSE	33825126	0.0100478	0.0337625	5.83692e-06	0.119889	TRUE
HIDRADENITISSUP	Asv016[Enhydrobacter (unc.)]	Dry	rs11676694	G	C	0.521955	0.0347414	0.159534	FALSE	55377032	0.0107417	0.035098	9.64364e-07	0.103872	TRUE
HIDRADENITISSUP	Asv016[Enhydrobacter (unc.)]	Dry	rs6838099	C	T	-0.502976	0.031115	0.807835	FALSE	35135981	0.0114248	0.0327956	6.76371e-06	0.10936	TRUE
HIDRADENITISSUP	Asv016[Enhydrobacter (unc.)]	Dry	rs7650739	C	T	-0.390548	-0.012535	0.517477	FALSE	33828221	0.0209269	0.0258552	6.05704e-06	0.0844576	TRUE
HIDRADENITISSUP	Asv016[Enhydrobacter (unc.)]	Dry	rs72862969	G	A	-0.74038	0.0310694	0.0357723	FALSE	33810367	0.0216453	0.0683366	1.661e-06	0.150822	TRUE
HIDRADENITISSUP	Asv016[Enhydrobacter (unc.)]	Dry	rs17247416	T	A	0.704806	0.0167444	0.0801207	FALSE	139454965	0.0240765	0.0471151	5.64828e-07	0.137197	TRUE
HIDRADENITISSUP	Asv016[Enhydrobacter (unc.)]	Dry	rs2664112	G	C	-0.475185	0.00753333	0.711249	FALSE	9150644	0.0264347	0.0287134	9.40868e-07	0.0944665	TRUE
HIDRADENITISSUP	Asv019[M. Luteus]	Dry	rs7585985	C	T	-0.426263	0.00435657	0.380649	FALSE	45871469	0.0290067	0.0266613	9.52639e-06	0.0942786	TRUE
HIDRADENITISSUP	Asv019[M. Luteus]	Dry	rs9314635	T	G	0.592409	0.120597	0.311098	FALSE	137718545	0.0401893	0.0587762	3.4219e-06	0.12171	TRUE
HIDRADENITISSUP	Asv019[M. Luteus]	Dry	rs1786812	C	G	-0.557855	-0.0311356	0.717861	FALSE	37506443	0.0147503	0.0127686	8.74564e-06	0.120161	TRUE
HIDRADENITISSUP	Asv019[M. Luteus]	Dry	rs9314635	T	G	0.592409	0.0247865	0.311216	FALSE	137718545	0.0446828	0.0123462	3.4219e-06	0.12171	TRUE
HIDRADENITISSUP	Asv019[M. Luteus]	Dry	rs1786812	C	G	-0.557855	-0.151968	0.717992	FALSE	37506443	0.00249385	0.0502525	8.74564e-06	0.120161	TRUE
HIDRADENITISSUP	Asv022[S. Salivarius]	Dry	rs600416	G	A	-0.733271	-0.124671	0.829121	FALSE	36258205	0.0448487	0.0621469	7.58407e-06	0.156778	TRUE
HIDRADENITISSUP	Asv022[S. Salivarius]	Dry	rs600416	G	A	-0.733271	-0.303973	0.829097	FALSE	36258205	0.0201261	0.130798	7.58407e-06	0.156778	TRUE
HIDRADENITISSUP	Asv022[S. Salivarius]	Dry	rs9314635	T	G	0.592409	0.0622085	0.311225	FALSE	137718545	0.00266048	0.0207054	3.4219e-06	0.12171	TRUE
HIDRADENITISSUP	Asv022[S. Salivarius]	Dry	rs600416	G	A	-0.733271	-0.0498889	0.829004	FALSE	36258205	0.0468317	0.0250973	7.58407e-06	0.156778	TRUE
HIDRADENITISSUP	Asv022[S. Salivarius]	Dry	rs10408898	A	G	0.730319	0.0240733	0.222611	FALSE	56868336	0.00712935	0.0089467	5.26399e-06	0.153267	TRUE
HIDRADENITISSUP	Asv022[S. Salivarius]	Dry	rs10408898	A	G	0.730319	0.170384	0.222556	FALSE	56868336	0.0133303	0.0688472	5.26399e-06	0.153267	TRUE
HIDRADENITISSUP	Asv022[S. Salivarius]	Dry	rs10408898	A	G	0.730319	0.323322	0.222208	FALSE	56868336	0.00030274	0.0894898	5.26399e-06	0.153267	TRUE
HIDRADENITISSUP	Asv022[S. Salivarius]	Dry	rs10901101	C	T	0.646199	0.0777092	0.312935	FALSE	131801013	0.0128508	0.0312351	6.14227e-06	0.136675	TRUE
HIDRADENITISSUP	Genus Enhydrobacter	Moist	rs13410206	T	C	0.897537	0.0769769	0.169402	FALSE	211655777	0.0463767	0.038644	6.9735e-06	0.19107	TRUE
HIDRADENITISSUP	Genus Enhydrobacter	Moist	rs10408898	A	G	0.730319	-0.0252337	0.222613	FALSE	56868336	0.00160382	0.0179754	5.26399e-06	0.153267	TRUE
HIDRADENITISSUP	Genus Haemophilus	Dry	rs10901101	C	T	0.646199	0.0208606	0.313061	FALSE	131801013	0.00196412	0.0161479	6.14227e-06	0.136675	TRUE
HIDRADENITISSUP	Genus Haemophilus	Dry	rs1461400	C	T	0.602042	-0.0148813	0.383198	FALSE	26256595	0.00332872	0.0153677	1.79008e-06	0.119952	TRUE
HIDRADENITISSUP	Genus Haemophilus	Dry	rs4402543	T	C	0.59305	0.0124382	0.453233	FALSE	91532182	0.00409347	0.0150759	2.27347e-06	0.119484	TRUE
HIDRADENITISSUP	Genus Haemophilus	Dry	rs600416	G	A	-0.733271	0.0141316	0.829032	FALSE	36258205	0.00479105	0.0199671	7.58407e-06	0.156778	TRUE
HIDRADENITISSUP	Genus Haemophilus	Dry	rs1786812	C	G	-0.557855	-0.00620842	0.717814	FALSE	37506443	0.00709968	0.0166939	8.74564e-06	0.120161	TRUE
HIDRADENITISSUP	Genus Haemophilus	Dry	rs9314635	T	G	0.592409	0.00584086	0.311152	FALSE	137718545	0.00717482	0.0161427	3.4219e-06	0.12171	TRUE
HIDRADENITISSUP	Genus Haemophilus	Dry	rs13410206	T	C	0.897537	0.00192545	0.16947	FALSE	211655777	0.00923299	0.0199987	6.9735e-06	0.19107	TRUE
HIDRADENITISSUP	Genus Haemophilus	Dry	rs10901101	C	T	0.646199	-0.0264962	0.312866	FALSE	131801013	0.000613196	0.0122585	6.14227e-06	0.136675	TRUE
HIDRADENITISSUP	Genus Haemophilus	Dry	rs1786812	C	G	-0.557855	0.021116	0.718691	FALSE	37506443	0.00191487	0.0126758	8.74564e-06	0.120161	TRUE
HIDRADENITISSUP	Genus Haemophilus	Dry	rs600416	G	A	-0.733271	-0.023882	0.829025	FALSE	36258205	0.00229016	0.015132	7.58407e-06	0.156778	TRUE
HIDRADENITISSUP	Genus Haemophilus	Dry	rs9314635	T	G	0.592409	-0.0166761	0.310363	FALSE	137718545	0.00343846	0.0122075	3.4219e-06	0.12171	TRUE
HIDRADENITISSUP	Genus Haemophilus	Dry	rs4402543	T	C	0.59305	-0.00435937	0.454119	FALSE	91532182	0.0140614	0.0114365	2.27347e-06	0.119484	TRUE
HIDRADENITISSUP	Genus Haemophilus	Dry	rs1461400	C	T	0.602042	-0.00308852	0.383526	FALSE	26256595	0.0158241	0.0116659	1.79008e-06	0.119952	TRUE
HIDRADENITISSUP	Genus Haemophilus	Dry	rs13410206	T	C	0.897537	0.0010031	0.169535	FALSE	211655777	0.0189453	0.0151664	6.9735e-06	0.19107	TRUE
HIDRADENITISSUP	Family Moraxellaceae	Moist	rs10408898	A	G	0.730319	-0.000565721	0.222577	FALSE	56868336	0.0193375	0.0136217	5.26399e-06	0.153267	TRUE
HIDRADENITISSUP	Family Moraxellaceae	Moist	rs1786812	C	G	-0.557855	0.0312847	0.718484	FALSE	37506443	0.00711275	0.0292314	8.74564e-06	0.120161	TRUE
HIDRADENITISSUP	Family Moraxellaceae	Moist	rs10901101	C	T	0.646199	-0.0293415	0.313078	FALSE	131801013	0.00751683	0.0283495	6.14227e-06	0.136675	TRUE
HIDRADENITISSUP	Class Betaproteobacteria	Moist	rs600416	G	A	-0.733271	-0.0343003	0.829113	FALSE	36258205	0.00818977	0.0350369	7.58407e-06	0.156778	TRUE
HIDRADENITISSUP	Class Betaproteobacteria	Moist	rs4402543	T	C	0.59305	0.0257067	0.454457	FALSE	91532182	0.00826618	0.0264251	2.27347e-06	0.119484	TRUE
HIDRADENITISSUP	Class Betaproteobacteria	Moist	rs10408898	A	G	0.730319	0.0125941	0.22255	FALSE	56868336	0.0172266	0.0314754	5.26399e-06	0.153267	TRUE
HIDRADENITISSUP	Class Betaproteobacteria	Moist	rs1461400	C	T	0.602042	-0.0105545	0.383607	FALSE	26256595	0.0173869	0.0269639	1.79008e-06	0.119952	TRUE
HIDRADENITISSUP	Class Betaproteobacteria	Moist	rs9314635	T	G	0.592409	-0.00868508	0.310439	FALSE	137718545	0.0189547	0.028211	3.4219e-06	0.12171	TRUE
HIDRADENITISSUP	Class Betaproteobacteria	Moist	rs13410206	T	C	0.897537	0.00858804	0.169575	FALSE	211655777	0.0201692	0.0351105	6.9735e-06	0.19107	TRUE
HIDRADENITISSUP	Class Betaproteobacteria	Moist	rs1461400	C	T	0.602042	0.0663132	0.383779	FALSE	26256595	0.000413607	0.0265219	1.79008e-06	0.119952	TRUE
PILONIDALCYST	Asv011[Staphylococcus (unc.)]	Moist	rs4402543	T	C	0.59305	-0.0469091	0.454236	FALSE	91532182	0.00236662	0.0259815	2.27347e-06	0.119484	TRUE
PILONIDALCYST	Asv011[Staphylococcus (unc.)]	Moist	rs600416	G	A	-0.733271	-0.0512255	0.829085	FALSE	36258205	0.00454243	0.0343838	7.58407e-06	0.156778	TRUE
PILONIDALCYST	Asv011[Staphylococcus (unc.)]	Moist	rs10408898	A	G	0.730319	0.0320549	0.222582	FALSE	56868336	0.00998887	0.0309067	5.26399e-06	0.153267	TRUE
PILONIDALCYST	Asv011[Staphylococcus (unc.)]	Moist	rs13410206	T	C	0.897537	0.0226926	0.169587	FALSE	211655777	0.0170328	0.0345235	6.9735e-06	0.19107	TRUE
PILONIDALCYST	Asv011[Staphylococcus (unc.)]	Moist	rs1786812	C	G	-0.557855	0.0100718	0.718434	FALSE	37506443	0.0241597	0.0286082	8.74564e-06	0.120161	TRUE
PILONIDALCYST	Asv011[Staphylococcus (unc.)]	Moist	rs10901101	C	T	0.646199	0.00318777	0.313138	FALSE	131801013	0.0303013	0.0279015	6.14227e-06	0.136675	TRUE
PILONIDALCYST	Asv011[Staphylococcus (unc.)]	Moist	rs9314635	T	G	0.592409	0.00299684	0.310473	FALSE	137718545	0.0304607	0.0276919	3.4219e-06	0.12171	TRUE
PILONIDALCYST	Asv011[Staphylococcus (unc.)]	Moist	rs11639905	C	T	0.717136	0.0535668	0.15735	FALSE	80452613	0.00501567	0.0372542	7.79e-06	0.155583	TRUE
PILONIDALCYST	Asv011[Staphylococcus (unc.)]	Moist	rs72683245	A	G	0.750287	0.0500141	0.109783	FALSE	154841518	0.0083657	0.0435665	7.32e-06	0.162266	TRUE
PILONIDALCYST	Asv011[Staphylococcus (unc.)]	Moist	rs3949057	T	C	0.698461	-0.0549319	0.0803204	FALSE	107888520	0.00933147	0.0508419	1.49e-06	0.140123	TRUE
PILONIDALCYST	Asv011[Staphylococcus (unc.)]	Moist	rs7299120	A	G	-0.465093	0.0268717	0.674769	FALSE	22081537	0.0118093	0.0290091	7.8e-06	0.100911	TRUE
PILONIDALCYST	Asv011[Staphylococcus (unc.)]	Moist	rs10992526	T	C	1.01662	-0.0343617	0.0940555	FALSE	92909194	0.0154033	0.0467255	2.61e-06	0.209184	TRUE
PILONIDALCYST	Asv011[Staphylococcus (unc.)]	Moist	rs113953116	A	G	1.01155	-0.0497088	0.0407655	FALSE	6778936	0.015764	0.0692578	7.31e-07	0.19678	TRUE
PILONIDALCYST	Asv015[Corynebacterium (unc.)]	Moist	rs7512838	C	G	-0.518601	0.0112291	0.525194	FALSE	18410497	0.0226941	0.027299	5.43e-06	0.110501	TRUE
PILONIDALCYST	Asv015[Corynebacterium (unc.)]	Moist	rs10804599	A	T	0.97315	0.00870963	0.104066	FALSE	130475887	0.0281881	0.044738	2.02e-06	0.19789	TRUE
PILONIDALCYST	Asv015[Corynebacterium (unc.)]	Moist	rs17797675	G	A	0.654459	-0.00463846	0.168159	FALSE	9581805	0.029975	0.0366364	6.66e-06	0.140875	TRUE
PILONIDALCYST	Asv015[Corynebacterium (unc.)]	Moist	rs10804599	A	T	0.97315	0.419856	0.103069	FALSE	130475887	0.00050918	0.168532	2.01627e-06	0.19789	TRUE
PILONIDALCYST	Asv019[M. Luteus]	Moist	rs7512838	C	G	-0.518601	-0.158028	0.5242	FALSE	18410497	0.00487736	0.102171	5.42707e-06	0.110501	TRUE
PILONIDALCYST	Asv019[M. Luteus]	Moist	rs113953116	A	G	1.01155	-0.384442	0.0410398	FALSE	6778936	0.00553332	0.259402	7.31284e-07	0.19678	TRUE
PILONIDALCYST	Asv019[M. Luteus]	Moist	rs7299120	A	G	-0.465093	-0.0973748	0.673819	FALSE	22081537	0.0148274	0.108775	7.80317e-06	0.100911	TRUE
PILONIDALCYST	Asv019[M. Luteus]	Moist	rs10992526	T	C	1.01662	0.155453	0.0942749	FALSE	92909194	0.0151501	0.176611	2.60908e-06	0.209184	TRUE
PILONIDALCYST	Asv019[M. Luteus]	Moist	rs11639905	C	T	0.717136	0.105424	0.157661	FALSE	80452613	0.017932	0.139035	7.79017e-06	0.155583	TRUE
PILONIDALCYST	Asv019[M. Luteus]	Moist	rs3949057	T	C	0.698461	-0.101059	0.0799184	FALSE	107888520	0.0239428	0.191961	1.49128e-06	0.140123	TRUE
PILONIDALCYST	Asv019[M. Luteus]	Moist	rs17797675	G	A	0.654459	-0.0483581	0.168349	FALSE	9581805	0.0289493	0.136808	6.66429e-06	0.140875	TRUE
PILONIDALCYST	Asv019[M. Luteus]	Moist	rs72683245	A	G	0.750287	0.0229582	0.110057	FALSE	154841518	0.0355775	0.165148	7.32162e-06	0.162266	TRUE
PILONIDALCYST	Asv019[M. Luteus]	Moist	rs11953805	T	C	-0.575347	0.0423282	0.392491	FALSE	29966143	0.00641815	0.0155298	5.57202e-06	0.120541	TRUE
PILONIDALCYST	Asv019[M. Luteus]	Moist	rs6934395	C	T	0.959828	-0.128743	0.100921	FALSE	168575882	0.0109916	0.0506269	6.53073e-06	0.202735	TRUE
PILONIDALCYST	Asv019[M. Luteus]	Moist	rs1796331	G	A	1.39835	-0.529062	0.114205	FALSE	71186451	0.000202064	0.142358	1.73408e-06	0.276805	TRUE
PILONIDALCYST	Asv019[M. Luteus]	Moist	rs1796331	G	A	1.39835	-0.0381369	0.114561	FALSE	71186451	0.00105738	0.0235755	1.73408e-06	0.276805	TRUE
PILONIDALCYST	Asv022[S. Salivarius]	Dry	rs11953805	T	C	-0.575347	0.0232227	0.392617	FALSE	29966143	0.00129867	0.0153323	5.57202e-06	0.120541	TRUE
PILONIDALCYST	Asv022[S. Salivarius]	Dry	rs6934395	C	T	0.959828	-0.0109162	0.100844	FALSE	168575882	0.00659304	0.0247604	6.53073e-06	0.202735	TRUE
PILONIDALCYST	Asv022[S. Salivarius]	Dry	rs1796331	G	A	1.39835	-0.0260263	0.114685	FALSE	71186451	0.0028918	0.0178396	1.73408e-06	0.276805	TRUE
PILONIDALCYST	Asv022[S. Salivarius]	Dry	rs6934395	C	T	0.959828	-0.0225419	0.100663	FALSE	168575882	0.00461768	0.018815	6.53073e-06	0.202735	TRUE
PILONIDALCYST	Asv022[S. Salivarius]	Dry	rs11953805	T	C	-0.575347	-0.0102873	0.393031	FALSE	29966143	0.00751136	0.0116097	5.57202e-06	0.120541	TRUE
PILONIDALCYST	Asv022[S. Salivarius]	Dry	rs6934395	C	T	0.959828	0.0937197	0.100875	FALSE	168575882	0.000763695	0.0433303	6.53073e-06	0.202735	TRUE
PILONIDALCYST	Asv022[S. Salivarius]	Dry	rs11953805	T	C	-0.575347	0.00604187	0.393202	FALSE	29966143	0.0205549	0.0268863	5.57202e-06	0.120541	TRUE
PILONIDALCYST	Asv022[S. Salivarius]	Dry	rs1796331	G	A	1.39835	-0.00415362	0.114855	FALSE	71186451	0.0229978	0.0413111	1.73408e-06	0.276805	TRUE
PILONIDALCYST	Asv042[Acinetobacter (unc.)]	Dry	rs1796331	G	A	1.39835	0.0838705	0.114958	FALSE	71186451	0.00126223	0.0403943	1.73408e-06	0.276805	TRUE
PILONIDALCYST	Asv042[Acinetobacter (unc.)]	Dry	rs11953805	T	C	-0.575347	0.00625068	0.393219	FALSE	29966143	0.0270856	0.0263616	5.57202e-06	0.120541	TRUE
PILONIDALCYST	Asv042[Acinetobacter (unc.)]	Dry	rs6934395	C	T	0.959828	-0.000227609	0.100786	FALSE	168575882	0.0331913	0.0426061	6.53073e-06	0.202735	TRUE
PILONIDALCYST	Asv042[Acinetobacter (unc.)]	Dry	rs11207304	G	A	0.603879	0.0330554	0.733212	FALSE	58765136	0.0093522	0.0306339	6.12e-06	0.128725	TRUE
PILONIDALCYST	Asv042[Acinetobacter (unc.)]	Dry	rs72640107	A	G	0.809931	0.0261449	0.123053	FALSE	142209282	0.0174941	0.0411129	2.26e-07	0.149151	TRUE
PILONIDALCYST	Asv042[Acinetobacter (unc.)]	Dry	rs55952639	C	T	0.918918	-0.0188801	0.0384486	FALSE	65072632	0.0263406	0.0709705	5.9e-06	0.195511	TRUE
PILONIDALCYST	Asv042[Acinetobacter (unc.)]	Dry	rs2749873	G	A	0.58409	0.00688101	0.545882	FALSE	52033986	0.0266995	0.0272975	2.57e-07	0.108112	TRUE
PILONIDALCYST	Asv042[Acinetobacter (unc.)]	Dry	rs2749873	G	A	0.58409	0.0404555	0.545458	FALSE	52033986	0.0276817	0.102139	2.56589e-07	0.108112	TRUE
PILONIDALCYST	Asv042[Acinetobacter (unc.)]	Dry	rs11207304	G	A	0.603879	0.00893863	0.732484	FALSE	58765136	0.0375073	0.11433	6.12441e-06	0.128725	TRUE
PILONIDALCYST	Asv042[Acinetobacter (unc.)]	Dry	rs55952639	C	T	0.918918	0.0124529	0.0383781	FALSE	65072632	0.0385073	0.266154	5.89794e-06	0.195511	TRUE
PILONIDALCYST	Asv042[Acinetobacter (unc.)]	Dry	rs72640107	A	G	0.809931	-0.00657363	0.123278	FALSE	142209282	0.038644	0.154669	2.25534e-07	0.149151	TRUE
PILONIDALCYST	Asv042[Acinetobacter (unc.)]	Dry	rs113109309	A	T	0.963806	-0.101668	0.0461348	FALSE	59876472	0.0038375	0.0645281	5.27e-06	0.202988	TRUE
PILONIDALCYST	Asv042[Acinetobacter (unc.)]	Dry	rs318423	A	G	-0.529759	-0.0380137	0.592745	FALSE	82551702	0.00568207	0.0277326	5.1e-06	0.111425	TRUE
PILONIDALCYST	Asv042[Acinetobacter (unc.)]	Dry	rs8085078	A	C	1.13916	-0.0820824	0.0419957	FALSE	4407726	0.00772557	0.0686412	6.76e-06	0.24264	TRUE
PILONIDALCYST	Asv042[Acinetobacter (unc.)]	Dry	rs342123	T	C	0.549411	0.0157855	0.625002	FALSE	20469836	0.0190973	0.0280004	3.9e-06	0.114084	TRUE
PILONIDALCYST	Asv042[Acinetobacter (unc.)]	Dry	rs7169869	A	G	-0.536875	-0.0150735	0.455326	FALSE	84935687	0.0193069	0.0271817	4.15e-06	0.111705	TRUE
PILONIDALCYST	Asv072[R. Mucilaginosa]	Dry	rs35531178	A	G	0.628	0.0191353	0.17021	FALSE	69027293	0.0198735	0.0361134	4.73e-06	0.131631	TRUE
PILONIDALCYST	Asv072[R. Mucilaginosa]	Dry	rs143203174	G	A	-0.781883	0.0212656	0.0952284	FALSE	15576318	0.0215786	0.0464888	6.74e-06	0.166827	TRUE
PILONIDALCYST	Asv072[R. Mucilaginosa]	Dry	rs6801640	C	T	0.891041	-0.0148581	0.121578	FALSE	72238016	0.024096	0.0418998	2.05e-06	0.178655	TRUE
PILONIDALCYST	Asv072[R. Mucilaginosa]	Dry	rs35531178	A	G	0.628	0.198428	0.169927	FALSE	69027293	0.00568728	0.135195	4.72563e-06	0.131631	TRUE
PILONIDALCYST	Asv072[R. Mucilaginosa]	Dry	rs143203174	G	A	-0.781883	-0.246156	0.0950791	FALSE	15576318	0.006281	0.173944	6.73838e-06	0.166827	TRUE
PILONIDALCYST	Asv072[R. Mucilaginosa]	Dry	rs342123	T	C	0.549411	0.127316	0.625218	FALSE	20469836	0.008915	0.10445	3.90275e-06	0.114084	TRUE
PILONIDALCYST	Asv072[R. Mucilaginosa]	Dry	rs7169869	A	G	-0.536875	-0.0707091	0.455667	FALSE	84935687	0.0194904	0.101788	4.14964e-06	0.111705	TRUE
PILONIDALCYST	Asv076[Staphylococcus (unc.)]	Dry	rs318423	A	G	-0.529759	0.0647055	0.59329	FALSE	82551702	0.021224	0.103184	5.10021e-06	0.111425	TRUE
PILONIDALCYST	Asv076[Staphylococcus (unc.)]	Dry	rs6801640	C	T	0.891041	-0.0845136	0.121895	FALSE	72238016	0.0235512	0.156331	2.05032e-06	0.178655	TRUE
PILONIDALCYST	Asv076[Staphylococcus (unc.)]	Dry	rs113109309	A	T	0.963806	-0.0535308	0.0459549	FALSE	59876472	0.032786	0.234788	5.27167e-06	0.202988	TRUE
PILONIDALCYST	Asv076[Staphylococcus (unc.)]	Dry	rs8085078	A	C	1.13916	0.047483	0.0416467	FALSE	4407726	0.0341178	0.256161	6.76406e-06	0.24264	TRUE
PILONIDALCYST	Asv076[Staphylococcus (unc.)]	Dry	rs68004576	A	G	-0.56292	-0.0611973	0.10434	FALSE	42590725	0.00575013	0.0448594	8.6e-06	0.123852	TRUE
PILONIDALCYST	Asv076[Staphylococcus (unc.)]	Dry	rs55928628	C	T	-0.443296	0.0397369	0.302582	FALSE	103548132	0.00597897	0.0295948	4.62e-06	0.0946104	TRUE
PILONIDALCYST	Asv076[Staphylococcus (unc.)]	Dry	rs75336843	C	T	-0.685613	0.0287936	0.0612253	FALSE	100485512	0.0206803	0.0581371	3.01e-06	0.143434	TRUE
PILONIDALCYST	Asv076[Staphylococcus (unc.)]	Dry	rs34667288	A	C	-0.669201	-0.0217107	0.0916126	FALSE	51102874	0.0215294	0.0472497	3.58e-06	0.141119	TRUE
PILONIDALCYST	Asv076[Staphylococcus (unc.)]	Dry	rs17550530	A	T	-0.423514	0.0116381	0.41632	FALSE	49721908	0.0224361	0.0275837	2.28e-06	0.0874805	TRUE
PILONIDALCYST	Asv100[F. Magna]	Dry	rs11654508	G	A	-0.507268	-0.00539393	0.259877	FALSE	80798147	0.0287256	0.0309776	3.11e-07	0.0964178	TRUE
PILONIDALCYST	Asv100[F. Magna]	Dry	rs2723690	T	C	-0.772596	-0.00384334	0.0552762	FALSE	168620433	0.0316434	0.0604455	8.72e-06	0.170101	TRUE
PILONIDALCYST	Asv100[F. Magna]	Dry	rs11654508	G	A	-0.507268	0.176247	0.26011	FALSE	80798147	0.0050872	0.115548	3.10529e-07	0.0964178	TRUE
PILONIDALCYST	Asv100[F. Magna]	Dry	rs68004576	A	G	-0.56292	0.197191	0.103852	FALSE	42590725	0.00959276	0.167759	8.6009e-06	0.123852	TRUE
PILONIDALCYST	Asv100[F. Magna]	Dry	rs2723690	T	C	-0.772596	-0.182901	0.0549327	FALSE	168620433	0.0162258	0.219944	8.71853e-06	0.170101	TRUE
PILONIDALCYST	Asv100[F. Magna]	Dry	rs34667288	A	C	-0.669201	0.116563	0.092012	FALSE	51102874	0.0201938	0.174788	3.57735e-06	0.141119	TRUE
PILONIDALCYST	Genus Enhydrobacter	Moist	rs55928628	C	T	-0.443296	0.0649096	0.301925	FALSE	103548132	0.0223521	0.111029	4.61657e-06	0.0946104	TRUE
PILONIDALCYST	Genus Enhydrobacter	Moist	rs75336843	C	T	-0.685613	0.00702258	0.0606628	FALSE	100485512	0.0389653	0.216571	3.01238e-06	0.143434	TRUE
PILONIDALCYST	Genus Enhydrobacter	Moist	rs17550530	A	T	-0.423514	0.000171089	0.417699	FALSE	49721908	0.0399469	0.102846	2.27651e-06	0.0874805	TRUE
PILONIDALCYST	Genus Enhydrobacter	Moist	rs13050263	C	G	0.464315	-0.0443963	0.210902	FALSE	21292983	0.00608217	0.0333005	2.08e-07	0.0873719	TRUE
PILONIDALCYST	Class Bacilli	Moist	rs16960676	T	C	0.655785	-0.0239831	0.0652537	FALSE	12786589	0.0220918	0.0549931	7.66e-06	0.143977	TRUE
PILONIDALCYST	Class Bacilli	Moist	rs28807761	A	G	0.704745	-0.012293	0.0666573	FALSE	27396116	0.0273741	0.0544007	3e-06	0.148021	TRUE
PILONIDALCYST	Class Bacilli	Moist	rs13050263	C	G	0.464315	-0.291923	0.211667	FALSE	21292983	0.000770228	0.124724	2.07572e-07	0.0873719	TRUE
PILONIDALCYST	Class Bacilli	Moist	rs16960676	T	C	0.655785	0.125642	0.065221	FALSE	12786589	0.021611	0.205165	7.66352e-06	0.143977	TRUE
PILONIDALCYST	Class Bacilli	Moist	rs28807761	A	G	0.704745	0.06704	0.0666272	FALSE	27396116	0.029616	0.20234	3.00445e-06	0.148021	TRUE
PILONIDALCYST	Class Bacilli	Moist	rs11793876	T	G	0.471391	0.152791	0.214063	FALSE	86206706	0.0215021	0.0664581	4.57565e-06	0.100261	TRUE
PILONIDALCYST	Class Bacilli	Moist	rs353091	T	C	0.465925	0.0315405	0.362006	FALSE	15153442	0.0083834	0.0119643	9.05525e-06	0.102487	TRUE
PILONIDALCYST	Class Bacilli	Moist	rs884587	T	C	-0.488865	-0.0326403	0.317511	FALSE	110614544	0.0411386	0.0159835	3.80966e-06	0.103077	TRUE
PILONIDALCYST	Class Bacilli	Moist	rs9438880	G	A	0.538796	-0.0837161	0.807134	FALSE	24996083	0.000358162	0.0234556	9.69662e-06	0.118929	TRUE
PILONIDALCYST	Class Bacilli	Moist	rs2312948	G	A	-0.450164	-0.0271183	0.64453	FALSE	8599306	0.0404352	0.0132331	2.62044e-06	0.0932829	TRUE
PILONIDALCYST	Class Bacilli	Moist	rs11793876	T	G	0.471391	-0.0894048	0.214287	FALSE	86206706	0.0167695	0.0373809	4.57565e-06	0.100261	TRUE
PILONIDALCYST	Class Bacilli	Moist	rs9438880	G	A	0.538796	-0.0244113	0.807036	FALSE	24996083	0.00961015	0.00942682	9.69662e-06	0.118929	TRUE
PILONIDALCYST	Class Bacilli	Moist	rs11793876	T	G	0.471391	0.104408	0.214367	FALSE	86206706	0.00238281	0.0343693	4.57565e-06	0.100261	TRUE
PILONIDALCYST	Class Bacilli	Moist	rs9438880	G	A	0.538796	-0.0803464	0.807264	FALSE	24996083	0.0279595	0.0365568	9.69662e-06	0.118929	TRUE
PILONIDALCYST	Class Bacilli	Moist	rs356156	G	A	-0.476063	-0.0258815	0.271187	FALSE	77620849	0.00123482	0.0168026	9.68701e-06	0.105077	TRUE
PILONIDALCYST	Class Bacilli	Moist	rs12589299	A	G	0.763272	-0.0193335	0.105622	FALSE	69490189	0.00426501	0.0243129	4.22178e-06	0.16172	TRUE
PILONIDALCYST	Class Bacilli	Moist	rs353091	T	C	0.465925	-0.00812664	0.361975	FALSE	15153442	0.00605202	0.0157208	9.05525e-06	0.102487	TRUE
PILONIDALCYST	Class Bacilli	Moist	rs884587	T	C	-0.488865	0.00680118	0.317513	FALSE	110614544	0.00673342	0.0161331	3.80966e-06	0.103077	TRUE
PILONIDALCYST	Order Actinomycetales	Dry	rs11793876	T	G	0.471391	0.0075971	0.214036	FALSE	86206706	0.00677156	0.018247	4.57565e-06	0.100261	TRUE
PILONIDALCYST	Order Actinomycetales	Dry	rs2312948	G	A	-0.450164	0.00357828	0.644476	FALSE	8599306	0.00819297	0.0156633	2.62044e-06	0.0932829	TRUE
PILONIDALCYST	Order Actinomycetales	Dry	rs9438880	G	A	0.538796	0.00422893	0.807005	FALSE	24996083	0.0082362	0.0189731	9.69662e-06	0.118929	TRUE
PILONIDALCYST	Order Actinomycetales	Dry	rs11793876	T	G	0.471391	0.0305457	0.214089	FALSE	86206706	0.000543188	0.0138265	4.57565e-06	0.100261	TRUE
PILONIDALCYST	Order Actinomycetales	Dry	rs2312948	G	A	-0.450164	-0.0189354	0.644902	FALSE	8599306	0.00221014	0.0118649	2.62044e-06	0.0932829	TRUE
PILONIDALCYST	Order Actinomycetales	Dry	rs353091	T	C	0.465925	0.0181117	0.361822	FALSE	15153442	0.00258566	0.0119397	9.05525e-06	0.102487	TRUE
PILONIDALCYST	Order Actinomycetales	Dry	rs9438880	G	A	0.538796	-0.0114161	0.806967	FALSE	24996083	0.00855808	0.0144	9.69662e-06	0.118929	TRUE
PILONIDALCYST	Order Actinomycetales	Dry	rs12589299	A	G	0.763272	-0.0113222	0.105587	FALSE	69490189	0.0107724	0.0184131	4.22178e-06	0.16172	TRUE
PILONIDALCYST	Order Actinomycetales	Dry	rs356156	G	A	-0.476063	-0.00768495	0.271143	FALSE	77620849	0.0109172	0.0127239	9.68701e-06	0.105077	TRUE
PILONIDALCYST	Order Bacteroidales	Dry	rs884587	T	C	-0.488865	0.00479187	0.317686	FALSE	110614544	0.013909	0.0122407	3.80966e-06	0.103077	TRUE
PILONIDALCYST	Order Bacteroidales	Dry	rs9438880	G	A	0.538796	0.066266	0.807076	FALSE	24996083	0.00118035	0.0333938	9.69662e-06	0.118929	TRUE
PILONIDALCYST	Order Bacteroidales	Dry	rs2312948	G	A	-0.450164	-0.054068	0.645036	FALSE	8599306	0.00123592	0.0275182	2.62044e-06	0.0932829	TRUE
PILONIDALCYST	Order Bacteroidales	Dry	rs356156	G	A	-0.476063	-0.0468926	0.271108	FALSE	77620849	0.00277885	0.0294361	9.68701e-06	0.105077	TRUE
PILONIDALCYST	Order Bacteroidales	Dry	rs11793876	T	G	0.471391	0.0443864	0.213842	FALSE	86206706	0.0041428	0.0320222	4.57565e-06	0.100261	TRUE
PILONIDALCYST	Order Bacteroidales	Dry	rs884587	T	C	-0.488865	0.0248987	0.317774	FALSE	110614544	0.00948097	0.0283165	3.80966e-06	0.103077	TRUE
PILONIDALCYST	Order Clostridiales	Moist	rs353091	T	C	0.465925	0.0134927	0.361712	FALSE	15153442	0.0156377	0.0276458	9.05525e-06	0.102487	TRUE
PILONIDALCYST	Order Clostridiales	Moist	rs12589299	A	G	0.763272	-0.0170493	0.105587	FALSE	69490189	0.0172307	0.0426336	4.22178e-06	0.16172	TRUE
PILONIDALCYST	Order Clostridiales	Moist	rs2312948	G	A	-0.450164	-0.0333936	0.645071	FALSE	8599306	0.00720747	0.0270037	2.62044e-06	0.0932829	TRUE
PILONIDALCYST	Order Clostridiales	Moist	rs884587	T	C	-0.488865	-0.0207809	0.317648	FALSE	110614544	0.0151799	0.0278397	3.80966e-06	0.103077	TRUE
PILONIDALCYST	Order Clostridiales	Moist	rs9438880	G	A	0.538796	0.0213213	0.807005	FALSE	24996083	0.0171595	0.0327312	9.69662e-06	0.118929	TRUE
PILONIDALCYST	Order Clostridiales	Moist	rs356156	G	A	-0.476063	-0.014221	0.271183	FALSE	77620849	0.0207347	0.0288482	9.68701e-06	0.105077	TRUE
PILONIDALCYST	Phylum Firmicutes	Dry	rs353091	T	C	0.465925	0.0133023	0.361709	FALSE	15153442	0.0208097	0.0271601	9.05525e-06	0.102487	TRUE
PILONIDALCYST	Phylum Firmicutes	Dry	rs11793876	T	G	0.471391	0.0115925	0.213797	FALSE	86206706	0.0237412	0.0314283	4.57565e-06	0.100261	TRUE
PILONIDALCYST	Phylum Firmicutes	Dry	rs12589299	A	G	0.763272	-0.00266441	0.105606	FALSE	69490189	0.0316378	0.041765	4.22178e-06	0.16172	TRUE
PILONIDALCYST	Phylum Firmicutes	Dry	rs73126493	T	C	0.45552	-0.0674809	0.351657	FALSE	39261306	0.0176653	0.0284422	2.06194e-06	0.0933497	TRUE
PILONIDALCYST	Phylum Firmicutes	Dry	rs6730352	C	T	0.651969	0.310627	0.849233	FALSE	11614328	0.0297735	0.142942	1.46535e-07	0.119931	TRUE
PILONIDALCYST	Phylum Firmicutes	Dry	rs12041469	G	C	0.450679	0.0367368	0.3752	FALSE	55272542	0.00174602	0.0117357	2.52508e-06	0.0932083	TRUE
PILONIDALCYST	Phylum Firmicutes	Dry	rs6710561	A	G	0.478683	-0.120191	0.283216	FALSE	109661298	0.0202106	0.0517527	6.80515e-06	0.103773	TRUE
PILONIDALCYST	Phylum Firmicutes	Dry	rs11143314	G	C	0.564714	0.107546	0.28143	FALSE	72526453	0.0373715	0.0516629	2.81836e-06	0.117382	TRUE
PILONIDALCYST	Phylum Firmicutes	Dry	rs2022033	G	A	0.479763	0.104993	0.237938	FALSE	94562453	0.00663942	0.0386798	8.57419e-06	0.105216	TRUE
PILONIDALCYST	Phylum Firmicutes	Sebaceous	rs12041469	G	C	0.450679	0.0758605	0.375155	FALSE	55272542	0.0277843	0.034477	2.52508e-06	0.0932083	TRUE
PILONIDALCYST	Phylum Firmicutes	Sebaceous	rs12041469	G	C	0.450679	0.0716961	0.375196	FALSE	55272542	0.0101932	0.027906	2.52508e-06	0.0932083	TRUE
PILONIDALCYST	Phylum Firmicutes	Sebaceous	rs10030794	G	A	-0.665426	0.0856167	0.872179	FALSE	67847054	0.0359575	0.0408202	1.22112e-06	0.133259	TRUE
PILONIDALCYST	Phylum Firmicutes	Sebaceous	rs4361465	A	G	0.512823	0.0906265	0.564604	FALSE	141061241	0.00301599	0.0305541	1.05808e-07	0.0932079	TRUE
PILONIDALCYST	Phylum Firmicutes	Sebaceous	rs12041469	G	C	0.450679	0.0626493	0.37491	FALSE	55272542	0.0447147	0.0312103	2.52508e-06	0.0932083	TRUE
PILONIDALCYST	Phylum Firmicutes	Sebaceous	rs328647	G	T	0.464455	-0.0681455	0.672284	FALSE	119646789	0.0315668	0.0316977	5.77642e-06	0.099881	TRUE
PILONIDALCYST	Phylum Firmicutes	Sebaceous	rs2022033	G	A	0.479763	-0.0424096	0.237913	FALSE	94562453	0.0157319	0.0175604	8.57419e-06	0.105216	TRUE
PILONIDALCYST	Phylum Firmicutes	Sebaceous	rs4361465	A	G	0.512823	-0.203083	0.564401	FALSE	141061241	0.0400332	0.0989008	1.05808e-07	0.0932079	TRUE
PILONIDALCYST	Phylum Firmicutes	Sebaceous	rs12041469	G	C	0.450679	-0.040315	0.375395	FALSE	55272542	0.0378756	0.0194177	2.52508e-06	0.0932083	TRUE
PILONIDALCYST	Phylum Firmicutes	Sebaceous	rs328647	G	T	0.464455	0.0471264	0.672255	FALSE	119646789	0.0417436	0.0231458	5.77642e-06	0.099881	TRUE
RHINOPHYMA	Asv008[Staphylococcus (unc.)]	Sebaceous	rs12734849	G	A	-0.461478	0.0724337	0.419738	FALSE	82504087	0.0200623	0.0311518	4.65964e-06	0.0982148	TRUE
RHINOPHYMA	Asv008[Staphylococcus (unc.)]	Sebaceous	rs16901004	T	C	0.516006	-0.226687	0.197137	FALSE	125958758	0.0105923	0.0886926	9.97404e-06	0.114038	TRUE
RHINOPHYMA	Asv008[Staphylococcus (unc.)]	Sebaceous	rs4361465	A	G	0.512823	0.147744	0.564525	FALSE	141061241	0.0264466	0.0665636	1.05808e-07	0.0932079	TRUE
RHINOPHYMA	Asv008[Staphylococcus (unc.)]	Sebaceous	rs11143314	G	C	0.564714	0.0712554	0.28147	FALSE	72526453	0.0261589	0.0320415	2.81836e-06	0.117382	TRUE
RHINOPHYMA	Asv008[Staphylococcus (unc.)]	Sebaceous	rs4361465	A	G	0.512823	-0.0252343	0.564377	FALSE	141061241	0.00095067	0.0151171	1.05808e-07	0.0932079	TRUE
RHINOPHYMA	Asv008[Staphylococcus (unc.)]	Sebaceous	rs10030794	G	A	-0.665426	-0.0328448	0.872208	FALSE	67847054	0.00142392	0.02239	1.22112e-06	0.133259	TRUE
RHINOPHYMA	Asv010[Staphylococcus (unc.)]	Dry	rs16901004	T	C	0.516006	0.0244663	0.197534	FALSE	125958758	0.00192996	0.0187947	9.97404e-06	0.114038	TRUE
RHINOPHYMA	Asv010[Staphylococcus (unc.)]	Dry	rs6710561	A	G	0.478683	-0.0198171	0.283234	FALSE	109661298	0.00233908	0.0166481	6.80515e-06	0.103773	TRUE
RHINOPHYMA	Asv010[Staphylococcus (unc.)]	Dry	rs328647	G	T	0.464455	0.0153921	0.672309	FALSE	119646789	0.00334387	0.0159452	5.77642e-06	0.099881	TRUE
RHINOPHYMA	Asv010[Staphylococcus (unc.)]	Dry	rs11143314	G	C	0.564714	-0.0100255	0.281491	FALSE	72526453	0.00546743	0.0166357	2.81836e-06	0.117382	TRUE
RHINOPHYMA	Asv010[Staphylococcus (unc.)]	Dry	rs12041469	G	C	0.450679	0.00827612	0.375176	FALSE	55272542	0.00591284	0.0154124	2.52508e-06	0.0932083	TRUE
RHINOPHYMA	Asv010[Staphylococcus (unc.)]	Dry	rs6730352	C	T	0.651969	-0.00845122	0.849432	FALSE	11614328	0.00686477	0.0209375	1.46535e-07	0.119931	TRUE
RHINOPHYMA	Asv010[Staphylococcus (unc.)]	Dry	rs12734849	G	A	-0.461478	0.00340417	0.419447	FALSE	82504087	0.00822936	0.0152128	4.65964e-06	0.0982148	TRUE
RHINOPHYMA	Asv010[Staphylococcus (unc.)]	Dry	rs2022033	G	A	0.479763	-0.00278284	0.237957	FALSE	94562453	0.00875159	0.0177128	8.57419e-06	0.105216	TRUE
RHINOPHYMA	Asv010[Staphylococcus (unc.)]	Dry	rs73126493	T	C	0.45552	0.00161776	0.351631	FALSE	39261306	0.00917732	0.0156623	2.06194e-06	0.0933497	TRUE
RHINOPHYMA	Asv013[S. Epidermidis]	Moist	rs12041469	G	C	0.450679	-0.0320947	0.375034	FALSE	55272542	0.000120254	0.0116832	2.52508e-06	0.0932083	TRUE
RHINOPHYMA	Asv013[S. Epidermidis]	Moist	rs73126493	T	C	0.45552	0.0289559	0.351394	FALSE	39261306	0.000294856	0.0118738	2.06194e-06	0.0933497	TRUE
RHINOPHYMA	Asv013[S. Epidermidis]	Moist	rs328647	G	T	0.464455	-0.0292661	0.671665	FALSE	119646789	0.000309456	0.0120878	5.77642e-06	0.099881	TRUE
RHINOPHYMA	Asv013[S. Epidermidis]	Sebaceous	rs16901004	T	C	0.516006	-0.0108542	0.197939	FALSE	125958758	0.00891956	0.0142417	9.97404e-06	0.114038	TRUE
RHINOPHYMA	Asv013[S. Epidermidis]	Sebaceous	rs6730352	C	T	0.651969	-0.0114789	0.849847	FALSE	11614328	0.00939038	0.015871	1.46535e-07	0.119931	TRUE
RHINOPHYMA	Asv013[S. Epidermidis]	Sebaceous	rs6710561	A	G	0.478683	-0.0077244	0.283595	FALSE	109661298	0.0108027	0.0126091	6.80515e-06	0.103773	TRUE
RHINOPHYMA	Asv013[S. Epidermidis]	Sebaceous	rs11143314	G	C	0.564714	-0.00715619	0.282255	FALSE	72526453	0.0114049	0.0126059	2.81836e-06	0.117382	TRUE
RHINOPHYMA	Asv013[S. Epidermidis]	Sebaceous	rs12734849	G	A	-0.461478	0.00526627	0.418585	FALSE	82504087	0.0129471	0.0115126	4.65964e-06	0.0982148	TRUE
RHINOPHYMA	Asv013[S. Epidermidis]	Sebaceous	rs10030794	G	A	-0.665426	-0.00749676	0.872287	FALSE	67847054	0.0132054	0.017056	1.22112e-06	0.133259	TRUE
RHINOPHYMA	Asv013[S. Epidermidis]	Sebaceous	rs2022033	G	A	0.479763	0.00178765	0.237328	FALSE	94562453	0.0178855	0.0134514	8.57419e-06	0.105216	TRUE
RHINOPHYMA	Asv013[S. Epidermidis]	Sebaceous	rs4361465	A	G	0.512823	-0.00118036	0.564228	FALSE	141061241	0.018361	0.0114721	1.05808e-07	0.0932079	TRUE
RHINOPHYMA	Asv033[S. Capitis]	Sebaceous	rs11143314	G	C	0.564714	-0.0389834	0.282288	FALSE	72526453	0.00455953	0.0292348	2.81836e-06	0.117382	TRUE
RHINOPHYMA	Asv033[S. Capitis]	Sebaceous	rs12734849	G	A	-0.461478	0.0307891	0.418556	FALSE	82504087	0.00618358	0.0266152	4.65964e-06	0.0982148	TRUE
RHINOPHYMA	Asv033[S. Capitis]	Sebaceous	rs6710561	A	G	0.478683	0.0278595	0.283729	FALSE	109661298	0.00849815	0.0291933	6.80515e-06	0.103773	TRUE
RHINOPHYMA	Asv033[S. Capitis]	Sebaceous	rs73126493	T	C	0.45552	0.0221401	0.351067	FALSE	39261306	0.0105134	0.0274863	2.06194e-06	0.0933497	TRUE
RHINOPHYMA	Asv033[S. Capitis]	Sebaceous	rs12041469	G	C	0.450679	0.0217162	0.375463	FALSE	55272542	0.0105153	0.0269647	2.52508e-06	0.0932083	TRUE
RHINOPHYMA	Asv033[S. Capitis]	Sebaceous	rs6730352	C	T	0.651969	-0.0197553	0.849913	FALSE	11614328	0.0147459	0.036647	1.46535e-07	0.119931	TRUE
RHINOPHYMA	Asv054[Enhydrobacter (unc.)]	Moist	rs328647	G	T	0.464455	-0.0124896	0.671819	FALSE	119646789	0.0163775	0.0279604	5.77642e-06	0.099881	TRUE
RHINOPHYMA	Asv054[Enhydrobacter (unc.)]	Moist	rs10030794	G	A	-0.665426	-0.00432677	0.87227	FALSE	67847054	0.0228041	0.0392246	1.22112e-06	0.133259	TRUE
RHINOPHYMA	Asv054[Enhydrobacter (unc.)]	Moist	rs4361465	A	G	0.512823	0.00286354	0.564203	FALSE	141061241	0.0228503	0.0265197	1.05808e-07	0.0932079	TRUE
RHINOPHYMA	Asv054[Enhydrobacter (unc.)]	Moist	rs2022033	G	A	0.479763	-0.00139296	0.237361	FALSE	94562453	0.0241076	0.0311242	8.57419e-06	0.105216	TRUE
RHINOPHYMA	Asv054[Enhydrobacter (unc.)]	Moist	rs16901004	T	C	0.516006	-4.17904e-05	0.198103	FALSE	125958758	0.0249747	0.0329864	9.97404e-06	0.114038	TRUE
RHINOPHYMA	Asv054[Enhydrobacter (unc.)]	Moist	rs12734849	G	A	-0.461478	0.0669344	0.418672	FALSE	82504087	0.000346543	0.0261222	4.65964e-06	0.0982148	TRUE
RHINOPHYMA	Asv054[Enhydrobacter (unc.)]	Moist	rs12041469	G	C	0.450679	-0.0362917	0.375317	FALSE	55272542	0.00567863	0.0264699	2.52508e-06	0.0932083	TRUE
RHINOPHYMA	Asv054[Enhydrobacter (unc.)]	Moist	rs2022033	G	A	0.479763	0.0406855	0.237435	FALSE	94562453	0.00607663	0.0305056	8.57419e-06	0.105216	TRUE
RHINOPHYMA	Asv092[C. Kroppenstedtii]	Dry	rs4361465	A	G	0.512823	-0.0302598	0.564114	FALSE	141061241	0.0081704	0.0260343	1.05808e-07	0.0932079	TRUE
RHINOPHYMA	Asv092[C. Kroppenstedtii]	Dry	rs10030794	G	A	-0.665426	0.0409869	0.872321	FALSE	67847054	0.00964893	0.0386929	1.22112e-06	0.133259	TRUE
RHINOPHYMA	Asv092[C. Kroppenstedtii]	Dry	rs328647	G	T	0.464455	0.0130809	0.6719	FALSE	119646789	0.021134	0.0274764	5.77642e-06	0.099881	TRUE
RHINOPHYMA	Asv100[F. Magna]	Dry	rs6710561	A	G	0.478683	-0.00938264	0.283664	FALSE	109661298	0.024768	0.0286205	6.80515e-06	0.103773	TRUE
RHINOPHYMA	Asv100[F. Magna]	Dry	rs73126493	T	C	0.45552	0.00713555	0.351018	FALSE	39261306	0.0263906	0.0270203	2.06194e-06	0.0933497	TRUE
RHINOPHYMA	Asv100[F. Magna]	Dry	rs11143314	G	C	0.564714	-0.00437357	0.282344	FALSE	72526453	0.0292978	0.0287128	2.81836e-06	0.117382	TRUE
RHINOPHYMA	Asv100[F. Magna]	Dry	rs6730352	C	T	0.651969	-0.0032002	0.849941	FALSE	11614328	0.0309768	0.0360699	1.46535e-07	0.119931	TRUE
RHINOPHYMA	Asv100[F. Magna]	Dry	rs16901004	T	C	0.516006	0.00276634	0.198104	FALSE	125958758	0.0310569	0.0322799	9.97404e-06	0.114038	TRUE
RHINOPHYMA	Asv100[F. Magna]	Dry	rs10001433	A	C	-0.391142	-0.126446	0.400996	FALSE	150748966	0.0226558	0.0554784	9.62557e-07	0.078223	TRUE
RHINOPHYMA	Asv122[Staphylococcus (unc.)]	Sebaceous	rs10255351	T	G	-0.436996	0.335888	0.212728	FALSE	88385637	0.0102431	0.130822	2.15142e-06	0.090496	TRUE
RHINOPHYMA	Asv122[Staphylococcus (unc.)]	Sebaceous	rs75260065	A	G	-0.647396	0.138971	0.0779683	FALSE	84829533	0.0110162	0.0546659	9.53945e-07	0.129422	TRUE
RHINOPHYMA	Asv122[Staphylococcus (unc.)]	Sebaceous	rs75260065	A	G	-0.647396	-0.413138	0.0779047	FALSE	84829533	0.0230781	0.181828	9.53945e-07	0.129422	TRUE
RHINOPHYMA	Asv122[Staphylococcus (unc.)]	Sebaceous	rs10255351	T	G	-0.436996	0.0550004	0.212711	FALSE	88385637	0.0374516	0.0264322	2.15142e-06	0.090496	TRUE
RHINOPHYMA	Asv122[Staphylococcus (unc.)]	Sebaceous	rs10255351	T	G	-0.436996	0.0824015	0.21265	FALSE	88385637	0.0275937	0.037404	2.15142e-06	0.090496	TRUE
RHINOPHYMA	Asv122[Staphylococcus (unc.)]	Sebaceous	rs10255351	T	G	-0.436996	0.0198497	0.212858	FALSE	88385637	0.0295924	0.0091242	2.15142e-06	0.090496	TRUE
RHINOPHYMA	Asv122[Staphylococcus (unc.)]	Sebaceous	rs75260065	A	G	-0.647396	0.250036	0.077936	FALSE	84829533	0.0432524	0.123703	9.53945e-07	0.129422	TRUE
RHINOPHYMA	Family Rhodobacteraceae	Dry	rs10001433	A	C	-0.391142	0.0502414	0.401042	FALSE	150748966	0.0389162	0.0243291	9.62557e-07	0.078223	TRUE
RHINOPHYMA	Family Rhodobacteraceae	Dry	rs7610681	A	G	0.392307	0.0707741	0.37299	FALSE	175370353	0.0178608	0.0298815	8.34551e-06	0.0864744	TRUE
RHINOPHYMA	Family Rhodobacteraceae	Dry	rs10255351	T	G	-0.436996	-0.343302	0.212882	FALSE	88385637	0.00785145	0.129139	2.15142e-06	0.090496	TRUE
RHINOPHYMA	Family Rhodobacteraceae	Dry	rs2701268	A	G	-0.560219	0.338496	0.15917	FALSE	172486471	0.0176112	0.142603	2.76941e-07	0.106667	TRUE
RHINOPHYMA	Family Streptococcaceae	Moist	rs1027350	A	G	0.451187	0.315823	0.833978	FALSE	166477853	0.0264071	0.142252	7.5355e-06	0.0989574	TRUE
RHINOPHYMA	Family Streptococcaceae	Moist	rs2701268	A	G	-0.560219	-0.0308609	0.159048	FALSE	172486471	0.00130196	0.0203928	2.76941e-07	0.106667	TRUE
RHINOPHYMA	Family Streptococcaceae	Moist	rs12283922	G	T	-0.425566	0.0141581	0.66534	FALSE	95018107	0.00374098	0.015929	3.19777e-06	0.0897056	TRUE
RHINOPHYMA	Family Streptococcaceae	Moist	rs10001433	A	C	-0.391142	-0.00630829	0.400908	FALSE	150748966	0.00679355	0.0152616	9.62557e-07	0.078223	TRUE
RHINOPHYMA	Family Streptococcaceae	Moist	rs7610681	A	G	0.392307	0.00515591	0.372884	FALSE	175370353	0.00739084	0.0154801	8.34551e-06	0.0864744	TRUE
RHINOPHYMA	Family Streptococcaceae	Moist	rs10255351	T	G	-0.436996	-0.001435	0.212891	FALSE	88385637	0.00937387	0.0182676	2.15142e-06	0.090496	TRUE
RHINOPHYMA	Family Streptococcaceae	Moist	rs75260065	A	G	-0.647396	-0.000909785	0.0778997	FALSE	84829533	0.00974043	0.0279604	9.53945e-07	0.129422	TRUE
RHINOPHYMA	Family Streptococcaceae	Moist	rs1027350	A	G	0.451187	0.000220895	0.833947	FALSE	166477853	0.0099125	0.0201424	7.5355e-06	0.0989574	TRUE
RHINOPHYMA	Family Streptococcaceae	Moist	rs10001433	A	C	-0.391142	0.025315	0.400075	FALSE	150748966	0.00057236	0.0115662	9.62557e-07	0.078223	TRUE
RHINOPHYMA	Class Gammaproteobacteria	Moist	rs10255351	T	G	-0.436996	0.0255203	0.21291	FALSE	88385637	0.00131389	0.013866	2.15142e-06	0.090496	TRUE
RHINOPHYMA	Class Gammaproteobacteria	Moist	rs12283922	G	T	-0.425566	0.0178888	0.664282	FALSE	95018107	0.00277518	0.0120835	3.19777e-06	0.0897056	TRUE
RHINOPHYMA	Class Gammaproteobacteria	Moist	rs2701268	A	G	-0.560219	-0.0162389	0.159191	FALSE	172486471	0.00585846	0.0154402	2.76941e-07	0.106667	TRUE
RHINOPHYMA	Class Gammaproteobacteria	Moist	rs75260065	A	G	-0.647396	-0.0193025	0.0772324	FALSE	84829533	0.00722694	0.0211465	9.53945e-07	0.129422	TRUE
RHINOPHYMA	Class Gammaproteobacteria	Moist	rs1027350	A	G	0.451187	-0.0109488	0.833965	FALSE	166477853	0.00945294	0.0152452	7.5355e-06	0.0989574	TRUE
RHINOPHYMA	Class Gammaproteobacteria	Moist	rs7610681	A	G	0.392307	-0.00795644	0.373116	FALSE	175370353	0.0099658	0.0117493	8.34551e-06	0.0864744	TRUE
RHINOPHYMA	Phylum Bacteroidetes	Moist	rs1027350	A	G	0.451187	-0.0432064	0.833988	FALSE	166477853	0.00550097	0.0352295	7.5355e-06	0.0989574	TRUE
RHINOPHYMA	Phylum Bacteroidetes	Moist	rs10001433	A	C	-0.391142	0.026259	0.39971	FALSE	150748966	0.00814827	0.0267311	9.62557e-07	0.078223	TRUE
RHINOPHYMA	Phylum Bacteroidetes	Moist	rs12283922	G	T	-0.425566	-0.0178889	0.663882	FALSE	95018107	0.0130612	0.02797	3.19777e-06	0.0897056	TRUE
RHINOPHYMA	Phylum Bacteroidetes	Moist	rs7610681	A	G	0.392307	0.0150027	0.373316	FALSE	175370353	0.0145071	0.0271312	8.34551e-06	0.0864744	TRUE
RHINOPHYMA	Phylum Bacteroidetes	Moist	rs75260065	A	G	-0.647396	0.00760655	0.0772668	FALSE	84829533	0.0219003	0.048752	9.53945e-07	0.129422	TRUE
RHINOPHYMA	Phylum Bacteroidetes	Moist	rs10255351	T	G	-0.436996	0.00228895	0.21272	FALSE	88385637	0.0235799	0.0321254	2.15142e-06	0.090496	TRUE
RHINOPHYMA	Phylum Bacteroidetes	Moist	rs2701268	A	G	-0.560219	-0.00167272	0.159278	FALSE	172486471	0.0240676	0.0357741	2.76941e-07	0.106667	TRUE
RHINOPHYMA	Phylum Bacteroidetes	Moist	rs7610681	A	G	0.392307	-0.0833522	0.373078	FALSE	175370353	6.0927e-05	0.0267423	8.34551e-06	0.0864744	TRUE
RHINOPHYMA	Phylum Bacteroidetes	Moist	rs10001433	A	C	-0.391142	0.0698021	0.39984	FALSE	150748966	0.000249574	0.0261005	9.62557e-07	0.078223	TRUE
RHINOPHYMA	Phylum Bacteroidetes	Moist	rs10255351	T	G	-0.436996	0.0493428	0.212794	FALSE	88385637	0.00396123	0.0316366	2.15142e-06	0.090496	TRUE
RHINOPHYMA	Phylum Bacteroidetes	Moist	rs75260065	A	G	-0.647396	0.0509945	0.0773001	FALSE	84829533	0.00956827	0.0478992	9.53945e-07	0.129422	TRUE
RHINOPHYMA	Phylum Firmicutes	Sebaceous	rs2701268	A	G	-0.560219	-0.0326358	0.159245	FALSE	172486471	0.0117314	0.0350611	2.76941e-07	0.106667	TRUE
RHINOPHYMA	Phylum Firmicutes	Sebaceous	rs12283922	G	T	-0.425566	-0.00763682	0.663888	FALSE	95018107	0.026025	0.0274368	3.19777e-06	0.0897056	TRUE
RHINOPHYMA	Phylum Firmicutes	Sebaceous	rs1027350	A	G	0.451187	-0.00485934	0.834032	FALSE	166477853	0.0295975	0.0344806	7.5355e-06	0.0989574	TRUE
RHINOPHYMA	Phylum Firmicutes	Sebaceous	rs10837640	C	T	-0.57627	0.255133	0.375565	FALSE	41392393	0.0154878	0.105393	3.06886e-06	0.11854	TRUE
RHINOPHYMA	Phylum Firmicutes	Sebaceous	rs556213	T	C	0.662065	-0.0298581	0.804271	FALSE	7015951	0.0379236	0.0143847	5.32672e-06	0.139888	TRUE
RHINOPHYMA	Phylum Firmicutes	Sebaceous	rs10837640	C	T	-0.57627	0.231151	0.376605	FALSE	41392393	0.0225528	0.101341	3.06886e-06	0.11854	TRUE
RHINOPHYMA	Phylum Firmicutes	Sebaceous	rs17794699	C	T	0.589668	-0.0746336	0.242519	FALSE	20689143	0.00346697	0.0255334	9.34898e-06	0.12821	TRUE
RHINOPHYMA	Phylum Firmicutes	Sebaceous	rs1360546	G	A	-0.531293	-0.144851	0.6338	FALSE	16273638	0.0339313	0.0682972	7.65786e-06	0.114333	TRUE
RHINOPHYMA	Phylum Firmicutes	Sebaceous	rs11165142	T	C	1.20922	0.0917905	0.0389148	FALSE	91648803	0.003819	0.0317313	9.36632e-06	0.262943	TRUE
RHINOPHYMA	Phylum Firmicutes	Sebaceous	rs11165142	T	C	1.20922	0.108374	0.0388974	FALSE	91648803	0.00378094	0.0374236	9.36632e-06	0.262943	TRUE
RHINOPHYMA	Phylum Proteobacteria	Dry	rs10001793	C	T	0.518782	0.0243527	0.392799	FALSE	4339846	0.00112346	0.015338	6.40099e-06	0.110627	TRUE
RHINOPHYMA	Phylum Proteobacteria	Dry	rs17794699	C	T	0.589668	-0.0165565	0.242279	FALSE	20689143	0.00341916	0.0174207	9.34898e-06	0.12821	TRUE
RHINOPHYMA	Phylum Proteobacteria	Dry	rs10483944	G	A	-0.715843	-0.00858794	0.138753	FALSE	80099963	0.00691971	0.0216768	1.90335e-06	0.144002	TRUE
RHINOPHYMA	Phylum Proteobacteria	Dry	rs1360546	G	A	-0.531293	-0.00389943	0.633602	FALSE	16273638	0.00802075	0.0155565	7.65786e-06	0.114333	TRUE
RHINOPHYMA	Phylum Proteobacteria	Dry	rs7183633	A	G	1.23732	-0.00591534	0.0747035	FALSE	91346077	0.00835158	0.0284268	5.56886e-06	0.262014	TRUE
ROSACEANAS	Asv001[P. Acnes]	Sebaceous	rs556213	T	C	0.662065	0.00254031	0.804219	FALSE	7015951	0.00892632	0.0188207	5.32672e-06	0.139888	TRUE
ROSACEANAS	Asv001[P. Acnes]	Sebaceous	rs10837640	C	T	-0.57627	0.000544326	0.376533	FALSE	41392393	0.00971982	0.0154978	3.06886e-06	0.11854	TRUE
ROSACEANAS	Asv001[P. Acnes]	Sebaceous	rs10483944	G	A	-0.715843	0.027829	0.138981	FALSE	80099963	0.0018036	0.0164236	1.90335e-06	0.144002	TRUE
ROSACEANAS	Asv001[P. Acnes]	Sebaceous	rs1360546	G	A	-0.531293	-0.0197475	0.63385	FALSE	16273638	0.00187284	0.011779	7.65786e-06	0.114333	TRUE
ROSACEANAS	Asv001[P. Acnes]	Sebaceous	rs11165142	T	C	1.20922	0.0478693	0.0390484	FALSE	91648803	0.00201604	0.0291712	9.36632e-06	0.262943	TRUE
ROSACEANAS	Asv001[P. Acnes]	Sebaceous	rs10001793	C	T	0.518782	-0.0125159	0.392422	FALSE	4339846	0.00563064	0.0116223	6.40099e-06	0.110627	TRUE
ROSACEANAS	Asv001[P. Acnes]	Sebaceous	rs10837640	C	T	-0.57627	-0.0120326	0.376241	FALSE	41392393	0.00612316	0.0117584	3.06886e-06	0.11854	TRUE
ROSACEANAS	Asv001[P. Acnes]	Sebaceous	rs17794699	C	T	0.589668	0.00902413	0.242007	FALSE	20689143	0.00986802	0.0131756	9.34898e-06	0.12821	TRUE
ROSACEANAS	Asv001[P. Acnes]	Sebaceous	rs556213	T	C	0.662065	0.00514792	0.804214	FALSE	7015951	0.0143618	0.0142597	5.32672e-06	0.139888	TRUE
ROSACEANAS	Asv001[P. Acnes]	Sebaceous	rs7183633	A	G	1.23732	-0.00288706	0.07491	FALSE	91346077	0.0178604	0.0214677	5.56886e-06	0.262014	TRUE
ROSACEANAS	Asv001[P. Acnes]	Sebaceous	rs556213	T	C	0.662065	0.0768846	0.804316	FALSE	7015951	0.000489305	0.0329348	5.32672e-06	0.139888	TRUE
ROSACEANAS	Asv001[P. Acnes]	Sebaceous	rs10483944	G	A	-0.715843	0.0610424	0.138873	FALSE	80099963	0.00272145	0.0380719	1.90335e-06	0.144002	TRUE
ROSACEANAS	Asv001[P. Acnes]	Sebaceous	rs1360546	G	A	-0.531293	0.0395391	0.634363	FALSE	16273638	0.00366093	0.0272265	7.65786e-06	0.114333	TRUE
ROSACEANAS	Asv001[P. Acnes]	Sebaceous	rs11165142	T	C	1.20922	0.0638827	0.0389419	FALSE	91648803	0.0085835	0.0674163	9.36632e-06	0.262943	TRUE
ROSACEANAS	Asv001[P. Acnes]	Sebaceous	rs10837640	C	T	-0.57627	0.0255282	0.376423	FALSE	41392393	0.0086908	0.027181	3.06886e-06	0.11854	TRUE
ROSACEANAS	Asv002[Staphylococcus (unc.)]	Sebaceous	rs10001793	C	T	0.518782	-0.0106503	0.39251	FALSE	4339846	0.0173025	0.026894	6.40099e-06	0.110627	TRUE
ROSACEANAS	Asv002[Staphylococcus (unc.)]	Sebaceous	rs7183633	A	G	1.23732	0.0174264	0.074924	FALSE	91346077	0.0181441	0.0496805	5.56886e-06	0.262014	TRUE
ROSACEANAS	Asv002[Staphylococcus (unc.)]	Sebaceous	rs17794699	C	T	0.589668	-0.0106785	0.24181	FALSE	20689143	0.0181496	0.0304688	9.34898e-06	0.12821	TRUE
ROSACEANAS	Asv002[Staphylococcus (unc.)]	Sebaceous	rs10001793	C	T	0.518782	0.0444905	0.392664	FALSE	4339846	0.00304417	0.0263499	6.40099e-06	0.110627	TRUE
ROSACEANAS	Asv002[Staphylococcus (unc.)]	Sebaceous	rs10837640	C	T	-0.57627	-0.0287533	0.376299	FALSE	41392393	0.0093935	0.0267156	3.06886e-06	0.11854	TRUE
ROSACEANAS	Asv002[Staphylococcus (unc.)]	Sebaceous	rs556213	T	C	0.662065	-0.0274711	0.804146	FALSE	7015951	0.0131995	0.0323642	5.32672e-06	0.139888	TRUE
ROSACEANAS	Asv004[Corynebacterium (unc.)]	Moist	rs11165142	T	C	1.20922	-0.034957	0.0389064	FALSE	91648803	0.0198871	0.0660468	9.36632e-06	0.262943	TRUE
ROSACEANAS	Asv004[Corynebacterium (unc.)]	Moist	rs7183633	A	G	1.23732	0.0254022	0.0749191	FALSE	91346077	0.0201503	0.0490458	5.56886e-06	0.262014	TRUE
ROSACEANAS	Asv037[E. Aerosaccus]	Moist	rs17794699	C	T	0.589668	-0.0149654	0.241824	FALSE	20689143	0.0205258	0.0298206	9.34898e-06	0.12821	TRUE
ROSACEANAS	Asv037[E. Aerosaccus]	Moist	rs10483944	G	A	-0.715843	0.0159743	0.138811	FALSE	80099963	0.0223122	0.0374092	1.90335e-06	0.144002	TRUE
ROSACEANAS	Asv037[E. Aerosaccus]	Moist	rs1360546	G	A	-0.531293	0.0102987	0.634289	FALSE	16273638	0.0233475	0.0267673	7.65786e-06	0.114333	TRUE
ROSACEANAS	Asv037[E. Aerosaccus]	Moist	rs111289765	T	C	-0.408139	0.0733853	0.331123	FALSE	20402874	0.0100631	0.028514	2.61815e-06	0.0849177	TRUE
ROSACEANAS	Asv037[E. Aerosaccus]	Moist	rs12206344	G	C	-0.75434	0.428627	0.0908623	FALSE	22245576	0.0160339	0.177991	3.81533e-06	0.159695	TRUE
ROSACEANAS	Asv037[E. Aerosaccus]	Moist	rs72695710	C	T	-0.83742	-0.374905	0.111045	FALSE	165906118	0.0203732	0.161639	1.98451e-06	0.172081	TRUE
ROSACEANAS	Asv037[E. Aerosaccus]	Moist	rs12206344	G	C	-0.75434	0.20834	0.0907234	FALSE	22245576	0.0283159	0.0950076	3.81533e-06	0.159695	TRUE
ROSACEANAS	Asv037[E. Aerosaccus]	Moist	rs9592538	G	T	-0.425857	0.0592817	0.463155	FALSE	67940392	0.0295978	0.0272505	3.31292e-07	0.0812362	TRUE
ROSACEANAS	Asv037[E. Aerosaccus]	Moist	rs66498356	C	G	-0.444924	-0.226832	0.303773	FALSE	75935911	0.0401504	0.110531	3.78165e-06	0.0941521	TRUE
ROSACEANAS	Asv037[E. Aerosaccus]	Moist	rs12572683	G	A	0.450042	0.0298097	0.308993	FALSE	7610458	0.0159126	0.0123645	5.89688e-06	0.0972715	TRUE
ROSACEANAS	Asv037[E. Aerosaccus]	Moist	rs66498356	C	G	-0.444924	-0.0269869	0.30371	FALSE	75935911	0.0297797	0.0124192	3.78165e-06	0.0941521	TRUE
ROSACEANAS	Asv054[Enhydrobacter (unc.)]	Moist	rs72695710	C	T	-0.83742	-0.039285	0.111297	FALSE	165906118	0.0306337	0.0181724	1.98451e-06	0.172081	TRUE
ROSACEANAS	Asv054[Enhydrobacter (unc.)]	Moist	rs12206344	G	C	-0.75434	-0.177986	0.0906534	FALSE	22245576	0.029138	0.0815845	3.81533e-06	0.159695	TRUE
ROSACEANAS	Asv054[Enhydrobacter (unc.)]	Moist	rs34323080	T	C	-0.402286	-0.0778754	0.364868	FALSE	61844375	0.0249115	0.0347228	9.60258e-06	0.089077	TRUE
ROSACEANAS	Asv054[Enhydrobacter (unc.)]	Moist	rs12270027	A	G	-0.477759	-0.0772997	0.17755	FALSE	129693528	0.0312205	0.0358824	8.50568e-06	0.105144	TRUE
ROSACEANAS	Asv054[Enhydrobacter (unc.)]	Moist	rs12572683	G	A	0.450042	0.332354	0.30871	FALSE	7610458	0.00452554	0.117067	5.89688e-06	0.0972715	TRUE
ROSACEANAS	Asv054[Enhydrobacter (unc.)]	Moist	rs11206972	A	G	-0.578449	0.0863841	0.221549	FALSE	57100826	0.00809879	0.0326234	1.82007e-06	0.118411	TRUE
ROSACEANAS	Asv054[Enhydrobacter (unc.)]	Moist	rs72695710	C	T	-0.83742	0.107247	0.111323	FALSE	165906118	0.0143781	0.043816	1.98451e-06	0.172081	TRUE
ROSACEANAS	Asv054[Enhydrobacter (unc.)]	Moist	rs72695710	C	T	-0.83742	0.050136	0.111297	FALSE	165906118	0.0388365	0.0242682	1.98451e-06	0.172081	TRUE
ROSACEANAS	Asv076[Staphylococcus (unc.)]	Dry	rs66498356	C	G	-0.444924	-0.0472394	0.303748	FALSE	75935911	0.021229	0.0205043	3.78165e-06	0.0941521	TRUE
ROSACEANAS	Asv076[Staphylococcus (unc.)]	Dry	rs66498356	C	G	-0.444924	0.0409281	0.303599	FALSE	75935911	0.0027364	0.0136614	3.78165e-06	0.0941521	TRUE
ROSACEANAS	Asv076[Staphylococcus (unc.)]	Dry	rs12572683	G	A	0.450042	0.0362233	0.308901	FALSE	7610458	0.00774908	0.0136034	5.89688e-06	0.0972715	TRUE
ROSACEANAS	Asv076[Staphylococcus (unc.)]	Dry	rs66498356	C	G	-0.444924	0.0197387	0.30371	FALSE	75935911	0.0151057	0.00812349	3.78165e-06	0.0941521	TRUE
ROSACEANAS	Asv076[Staphylococcus (unc.)]	Dry	rs9592538	G	T	-0.425857	-0.0151836	0.463017	FALSE	67940392	0.0428795	0.00749852	3.31292e-07	0.0812362	TRUE
ROSACEANAS	Asv076[Staphylococcus (unc.)]	Dry	rs11206972	A	G	-0.578449	0.200686	0.221472	FALSE	57100826	0.0198276	0.0861465	1.82007e-06	0.118411	TRUE
ROSACEANAS	Genus Enhydrobacter	Dry	rs12572683	G	A	0.450042	0.176805	0.308727	FALSE	7610458	0.0131302	0.0712859	5.89688e-06	0.0972715	TRUE
ROSACEANAS	Genus Enhydrobacter	Dry	rs12572683	G	A	0.450042	0.147802	0.308831	FALSE	7610458	0.0174117	0.0621566	5.89688e-06	0.0972715	TRUE
ROSACEANAS	Genus Enhydrobacter	Dry	rs66498356	C	G	-0.444924	0.125582	0.303646	FALSE	75935911	0.0439359	0.0623324	3.78165e-06	0.0941521	TRUE
ROSACEANAS	Genus Enhydrobacter	Dry	rs12270027	A	G	-0.477759	-0.246221	0.177673	FALSE	129693528	0.0224978	0.107904	8.50568e-06	0.105144	TRUE
ROSACEANAS	Genus Staphylococcus	Dry	rs72695710	C	T	-0.83742	-0.116804	0.111185	FALSE	165906118	0.011293	0.0461038	1.98451e-06	0.172081	TRUE
ROSACEANAS	Genus Staphylococcus	Dry	rs12206344	G	C	-0.75434	0.0515919	0.0907077	FALSE	22245576	0.0191223	0.0220183	3.81533e-06	0.159695	TRUE
ROSACEANAS	Genus Staphylococcus	Dry	rs12206344	G	C	-0.75434	0.0646201	0.0907027	FALSE	22245576	0.0131768	0.0260675	3.81533e-06	0.159695	TRUE
ROSACEANAS	Genus Staphylococcus	Dry	rs72695710	C	T	-0.83742	-0.0295434	0.111287	FALSE	165906118	0.00214671	0.0238096	1.98451e-06	0.172081	TRUE
ROSACEANAS	Genus Staphylococcus	Dry	rs12270027	A	G	-0.477759	-0.0241702	0.177456	FALSE	129693528	0.00220308	0.0197193	8.50568e-06	0.105144	TRUE
ROSACEANAS	Genus Staphylococcus	Dry	rs111289765	T	C	-0.408139	0.016526	0.331108	FALSE	20402874	0.00298114	0.015883	2.61815e-06	0.0849177	TRUE
ROSACEANAS	Genus Staphylococcus	Dry	rs66498356	C	G	-0.444924	0.0163843	0.303708	FALSE	75935911	0.00313742	0.0162639	3.78165e-06	0.0941521	TRUE
ROSACEANAS	Genus Staphylococcus	Dry	rs12572683	G	A	0.450042	-0.012648	0.308953	FALSE	7610458	0.00434922	0.0161988	5.89688e-06	0.0972715	TRUE
ROSACEANAS	Family Micrococcaceae	Dry	rs34323080	T	C	-0.402286	0.0108374	0.364973	FALSE	61844375	0.00485341	0.0155323	9.60258e-06	0.089077	TRUE
ROSACEANAS	Family Micrococcaceae	Dry	rs11206972	A	G	-0.578449	-0.0112612	0.221604	FALSE	57100826	0.00533796	0.0180984	1.82007e-06	0.118411	TRUE
ROSACEANAS	Family Micrococcaceae	Dry	rs35541683	G	A	-0.709757	-0.00862932	0.06941	FALSE	51667348	0.00771092	0.0296593	9.86679e-06	0.157376	TRUE
ROSACEANAS	Family Micrococcaceae	Dry	rs9592538	G	T	-0.425857	-0.000444575	0.462918	FALSE	67940392	0.00976367	0.0150073	3.31292e-07	0.0812362	TRUE
ROSACEANAS	Family Micrococcaceae	Dry	rs34323080	T	C	-0.402286	0.0253745	0.365356	FALSE	61844375	0.00062306	0.0117741	9.60258e-06	0.089077	TRUE
ROSACEANAS	Family Micrococcaceae	Dry	rs9592538	G	T	-0.425857	0.0189523	0.463505	FALSE	67940392	0.00192287	0.0113907	3.31292e-07	0.0812362	TRUE
ROSACEANAS	Family Micrococcaceae	Dry	rs12206344	G	C	-0.75434	0.0281759	0.0906159	FALSE	22245576	0.00312022	0.0198615	3.81533e-06	0.159695	TRUE
ROSACEANAS	Family Micrococcaceae	Dry	rs66498356	C	G	-0.444924	-0.0142865	0.303848	FALSE	75935911	0.00496252	0.0123702	3.78165e-06	0.0941521	TRUE
SEBORRHOEIC	Asv008[Staphylococcus (unc.)]	Sebaceous	rs12572683	G	A	0.450042	-0.0112894	0.309264	FALSE	7610458	0.0071537	0.012274	5.89688e-06	0.0972715	TRUE
SEBORRHOEIC	Asv008[Staphylococcus (unc.)]	Sebaceous	rs12270027	A	G	-0.477759	-0.0126817	0.177589	FALSE	129693528	0.00794056	0.0149735	8.50568e-06	0.105144	TRUE
SEBORRHOEIC	Asv008[Staphylococcus (unc.)]	Sebaceous	rs72695710	C	T	-0.83742	0.0148598	0.111045	FALSE	165906118	0.00822868	0.0180914	1.98451e-06	0.172081	TRUE
SEBORRHOEIC	Asv008[Staphylococcus (unc.)]	Sebaceous	rs35541683	G	A	-0.709757	-0.0180021	0.0693344	FALSE	51667348	0.00838864	0.0222962	9.86679e-06	0.157376	TRUE
SEBORRHOEIC	Asv008[Staphylococcus (unc.)]	Sebaceous	rs111289765	T	C	-0.408139	-0.00613434	0.331668	FALSE	20402874	0.0121964	0.0120204	2.61815e-06	0.0849177	TRUE
SEBORRHOEIC	Asv008[Staphylococcus (unc.)]	Sebaceous	rs11206972	A	G	-0.578449	-0.00432204	0.222255	FALSE	57100826	0.0150589	0.0137314	1.82007e-06	0.118411	TRUE
SEBORRHOEIC	Asv010[Staphylococcus (unc.)]	Moist	rs12572683	G	A	0.450042	0.0756656	0.30955	FALSE	7610458	0.00017254	0.0280082	5.89688e-06	0.0972715	TRUE
SEBORRHOEIC	Asv010[Staphylococcus (unc.)]	Moist	rs35541683	G	A	-0.709757	-0.0927465	0.0692709	FALSE	51667348	0.00181067	0.0516283	9.86679e-06	0.157376	TRUE
SEBORRHOEIC	Asv010[Staphylococcus (unc.)]	Moist	rs9592538	G	T	-0.425857	0.0449572	0.463411	FALSE	67940392	0.00219003	0.0263186	3.31292e-07	0.0812362	TRUE
SEBORRHOEIC	Asv010[Staphylococcus (unc.)]	Moist	rs66498356	C	G	-0.444924	-0.0402311	0.304065	FALSE	75935911	0.0040044	0.0286449	3.78165e-06	0.0941521	TRUE
SEBORRHOEIC	Asv010[Staphylococcus (unc.)]	Moist	rs12270027	A	G	-0.477759	-0.0240547	0.177722	FALSE	129693528	0.0121662	0.0345788	8.50568e-06	0.105144	TRUE
SEBORRHOEIC	Asv011[Staphylococcus (unc.)]	Moist	rs34323080	T	C	-0.402286	-0.0178724	0.364961	FALSE	61844375	0.0127947	0.0272423	9.60258e-06	0.089077	TRUE
SEBORRHOEIC	Asv011[Staphylococcus (unc.)]	Moist	rs72695710	C	T	-0.83742	-0.0241542	0.110972	FALSE	165906118	0.0140813	0.0417878	1.98451e-06	0.172081	TRUE
SEBORRHOEIC	Asv011[Staphylococcus (unc.)]	Moist	rs111289765	T	C	-0.408139	0.0062198	0.331795	FALSE	20402874	0.0205771	0.0278192	2.61815e-06	0.0849177	TRUE
SEBORRHOEIC	Asv011[Staphylococcus (unc.)]	Moist	rs11206972	A	G	-0.578449	0.00595457	0.222499	FALSE	57100826	0.0212893	0.0318236	1.82007e-06	0.118411	TRUE
SEBORRHOEIC	Asv011[Staphylococcus (unc.)]	Moist	rs12206344	G	C	-0.75434	0.00607138	0.0905094	FALSE	22245576	0.0223728	0.0459632	3.81533e-06	0.159695	TRUE
SEBORRHOEIC	Asv011[Staphylococcus (unc.)]	Moist	rs12270027	A	G	-0.477759	-0.0571994	0.177654	FALSE	129693528	0.00308133	0.0339933	8.50568e-06	0.105144	TRUE
SEBORRHOEIC	Asv011[Staphylococcus (unc.)]	Moist	rs66498356	C	G	-0.444924	-0.0432544	0.304055	FALSE	75935911	0.0041065	0.0280599	3.78165e-06	0.0941521	TRUE
SEBORRHOEIC	Asv011[Staphylococcus (unc.)]	Moist	rs11206972	A	G	-0.578449	0.0402754	0.222553	FALSE	57100826	0.00654833	0.0311795	1.82007e-06	0.118411	TRUE
SEBORRHOEIC	Asv015[Corynebacterium (unc.)]	Moist	rs9592538	G	T	-0.425857	0.0217261	0.463349	FALSE	67940392	0.0133758	0.0258845	3.31292e-07	0.0812362	TRUE
SEBORRHOEIC	Asv015[Corynebacterium (unc.)]	Moist	rs72695710	C	T	-0.83742	-0.0312027	0.110951	FALSE	165906118	0.0150052	0.0413197	1.98451e-06	0.172081	TRUE
SEBORRHOEIC	Asv015[Corynebacterium (unc.)]	Moist	rs35541683	G	A	-0.709757	0.0306804	0.0693672	FALSE	51667348	0.0180323	0.0501847	9.86679e-06	0.157376	TRUE
SEBORRHOEIC	Asv015[Corynebacterium (unc.)]	Moist	rs34323080	T	C	-0.402286	-0.0129694	0.364961	FALSE	61844375	0.0209381	0.0267775	9.60258e-06	0.089077	TRUE
SEBORRHOEIC	Asv015[Corynebacterium (unc.)]	Moist	rs12206344	G	C	-0.75434	-0.0181924	0.090483	FALSE	22245576	0.0229483	0.0453719	3.81533e-06	0.159695	TRUE
SEBORRHOEIC	Asv015[Corynebacterium (unc.)]	Moist	rs111289765	T	C	-0.408139	-0.00735638	0.331769	FALSE	20402874	0.0262491	0.0272871	2.61815e-06	0.0849177	TRUE
SEBORRHOEIC	Asv015[Corynebacterium (unc.)]	Moist	rs12572683	G	A	0.450042	-0.00150029	0.309364	FALSE	7610458	0.0319032	0.0278876	5.89688e-06	0.0972715	TRUE
SEBORRHOEIC	Asv015[Corynebacterium (unc.)]	Moist	rs11001051	A	C	0.565904	-0.0588052	0.629008	FALSE	74483791	0.0360371	0.0280491	1.49556e-06	0.114173	TRUE
SEBORRHOEIC	Asv019[M. Luteus]	Moist	rs11893980	T	C	0.802869	0.22693	0.0683823	FALSE	109125590	0.00829144	0.0859594	1.09186e-06	0.159785	TRUE
SEBORRHOEIC	Asv019[M. Luteus]	Moist	rs2745431	C	G	0.515066	-0.106191	0.274421	FALSE	132687868	0.0416112	0.052121	4.89496e-06	0.109742	TRUE
SEBORRHOEIC	Asv019[M. Luteus]	Moist	rs2280613	A	G	0.544006	-0.0722797	0.272925	FALSE	70290755	0.0183147	0.0306374	1.95959e-06	0.111079	TRUE
SEBORRHOEIC	Asv019[M. Luteus]	Moist	rs2280613	A	G	0.544006	0.0650969	0.272868	FALSE	70290755	0.0349382	0.0308651	1.95959e-06	0.111079	TRUE
SEBORRHOEIC	Asv019[M. Luteus]	Moist	rs11001051	A	C	0.565904	0.0677913	0.629057	FALSE	74483791	0.0272088	0.0306955	1.49556e-06	0.114173	TRUE
SEBORRHOEIC	Asv019[M. Luteus]	Moist	rs4502906	A	G	0.44283	-0.036733	0.419771	FALSE	92157501	0.0141981	0.0149795	5.91205e-06	0.0952212	TRUE
SEBORRHOEIC	Asv019[M. Luteus]	Moist	rs12050699	G	T	0.503141	0.248248	0.613112	FALSE	69641266	0.0110187	0.0976546	2.30939e-06	0.103499	TRUE
SEBORRHOEIC	Asv019[M. Luteus]	Moist	rs11893980	T	C	0.802869	0.450114	0.0682816	FALSE	109125590	0.0210058	0.195034	1.09186e-06	0.159785	TRUE
SEBORRHOEIC	Asv019[M. Luteus]	Moist	rs2280613	A	G	0.544006	0.0467635	0.272934	FALSE	70290755	0.0319352	0.021799	1.95959e-06	0.111079	TRUE
SEBORRHOEIC	Asv019[M. Luteus]	Moist	rs4502906	A	G	0.44283	-0.0522177	0.42011	FALSE	92157501	0.0175869	0.0219937	5.91205e-06	0.0952212	TRUE
SEBORRHOEIC	Asv019[M. Luteus]	Moist	rs2280613	A	G	0.544006	0.0181301	0.272936	FALSE	70290755	0.0311007	0.00841002	1.95959e-06	0.111079	TRUE
SEBORRHOEIC	Asv019[M. Luteus]	Moist	rs11001051	A	C	0.565904	0.153114	0.628975	FALSE	74483791	0.0363095	0.0731401	1.49556e-06	0.114173	TRUE
SEBORRHOEIC	Asv037[E. Aerosaccus]	Moist	rs12050699	G	T	0.503141	-0.164652	0.613249	FALSE	69641266	0.0148844	0.067614	2.30939e-06	0.103499	TRUE
SEBORRHOEIC	Asv037[E. Aerosaccus]	Moist	rs11001051	A	C	0.565904	0.0342617	0.629057	FALSE	74483791	0.00857689	0.0130348	1.49556e-06	0.114173	TRUE
SEBORRHOEIC	Asv037[E. Aerosaccus]	Moist	rs11893980	T	C	0.802869	0.0629181	0.0682816	FALSE	109125590	0.0116858	0.0249527	1.09186e-06	0.159785	TRUE
SEBORRHOEIC	Asv037[E. Aerosaccus]	Moist	rs2745431	C	G	0.515066	-0.148653	0.274505	FALSE	132687868	0.0384521	0.0718127	4.89496e-06	0.109742	TRUE
SEBORRHOEIC	Asv037[E. Aerosaccus]	Moist	rs11001051	A	C	0.565904	0.0472832	0.62907	FALSE	74483791	0.00226558	0.0154874	1.49556e-06	0.114173	TRUE
SEBORRHOEIC	Asv037[E. Aerosaccus]	Moist	rs11893980	T	C	0.802869	0.073572	0.068252	FALSE	109125590	0.0131526	0.0296708	1.09186e-06	0.159785	TRUE
SEBORRHOEIC	Asv037[E. Aerosaccus]	Moist	rs2280613	A	G	0.544006	0.0342916	0.272964	FALSE	70290755	0.0410403	0.0167839	1.95959e-06	0.111079	TRUE
SEBORRHOEIC	Asv037[E. Aerosaccus]	Moist	rs12050699	G	T	0.503141	0.0255221	0.613155	FALSE	69641266	0.000971695	0.0153864	2.30939e-06	0.103499	TRUE
SEBORRHOEIC	Asv037[E. Aerosaccus]	Moist	rs28533187	G	C	-0.498802	0.0197117	0.258418	FALSE	61488702	0.00249123	0.0171037	4.31619e-06	0.105637	TRUE
SEBORRHOEIC	Asv037[E. Aerosaccus]	Moist	rs2745431	C	G	0.515066	-0.00935654	0.274507	FALSE	132687868	0.00575789	0.0167217	4.89496e-06	0.109742	TRUE
SEBORRHOEIC	Asv037[E. Aerosaccus]	Moist	rs1189820	A	G	0.805195	-0.00771447	0.0467129	FALSE	57054141	0.00827631	0.0354297	2.77943e-06	0.167042	TRUE
SEBORRHOEIC	Asv045[Acinetobacter (unc.)]	Moist	rs4502906	A	G	0.44283	0.00135643	0.419833	FALSE	92157501	0.00928444	0.0151045	5.91205e-06	0.0952212	TRUE
SEBORRHOEIC	Asv045[Acinetobacter (unc.)]	Moist	rs2745431	C	G	0.515066	0.0308862	0.274528	FALSE	132687868	0.00029222	0.0126485	4.89496e-06	0.109742	TRUE
SEBORRHOEIC	Asv045[Acinetobacter (unc.)]	Moist	rs2280613	A	G	0.544006	0.0209355	0.272284	FALSE	70290755	0.00198738	0.0127041	1.95959e-06	0.111079	TRUE
SEBORRHOEIC	Asv045[Acinetobacter (unc.)]	Moist	rs12050699	G	T	0.503141	0.0189234	0.612821	FALSE	69641266	0.00208924	0.0116552	2.30939e-06	0.103499	TRUE
SEBORRHOEIC	Asv045[Acinetobacter (unc.)]	Moist	rs28533187	G	C	-0.498802	-0.0197676	0.258389	FALSE	61488702	0.00257018	0.013005	4.31619e-06	0.105637	TRUE
SEBORRHOEIC	Asv045[Acinetobacter (unc.)]	Moist	rs1189820	A	G	0.805195	0.0302143	0.0465615	FALSE	57054141	0.00517828	0.0267629	2.77943e-06	0.167042	TRUE
SEBORRHOEIC	Asv045[Acinetobacter (unc.)]	Moist	rs4502906	A	G	0.44283	-0.00624171	0.419021	FALSE	92157501	0.0116975	0.0114259	5.91205e-06	0.0952212	TRUE
SEBORRHOEIC	Asv045[Acinetobacter (unc.)]	Moist	rs11893980	T	C	0.802869	0.00375898	0.0683266	FALSE	109125590	0.0173344	0.0223979	1.09186e-06	0.159785	TRUE
SEBORRHOEIC	Asv045[Acinetobacter (unc.)]	Moist	rs11001051	A	C	0.565904	0.000185847	0.628677	FALSE	74483791	0.0197471	0.0117252	1.49556e-06	0.114173	TRUE
SEBORRHOEIC	Asv086[A. Johnsonii]	Dry	rs2280613	A	G	0.544006	0.0377423	0.271995	FALSE	70290755	0.00494145	0.0292973	1.95959e-06	0.111079	TRUE
SEBORRHOEIC	Asv086[A. Johnsonii]	Dry	rs11001051	A	C	0.565904	0.0327232	0.628765	FALSE	74483791	0.0057127	0.027174	1.49556e-06	0.114173	TRUE
SEBORRHOEIC	Asv086[A. Johnsonii]	Dry	rs2745431	C	G	0.515066	0.0346488	0.274177	FALSE	132687868	0.00594545	0.029352	4.89496e-06	0.109742	TRUE
SEBORRHOEIC	Asv086[A. Johnsonii]	Dry	rs12050699	G	T	0.503141	0.0270586	0.612623	FALSE	69641266	0.00788985	0.0269627	2.30939e-06	0.103499	TRUE
SEBORRHOEIC	Asv086[A. Johnsonii]	Dry	rs1189820	A	G	0.805195	-0.0611357	0.046408	FALSE	57054141	0.00810867	0.0620312	2.77943e-06	0.167042	TRUE
SEBORRHOEIC	Asv086[A. Johnsonii]	Dry	rs11893980	T	C	0.802869	0.046514	0.0683214	FALSE	109125590	0.00923068	0.0518019	1.09186e-06	0.159785	TRUE
SEBORRHOEIC	Asv086[A. Johnsonii]	Dry	rs28533187	G	C	-0.498802	-0.0218023	0.258586	FALSE	61488702	0.0116713	0.0299642	4.31619e-06	0.105637	TRUE
SEBORRHOEIC	Genus Micrococcus	Moist	rs4502906	A	G	0.44283	0.00238116	0.418954	FALSE	92157501	0.0232043	0.026415	5.91205e-06	0.0952212	TRUE
SEBORRHOEIC	Genus Micrococcus	Moist	rs11001051	A	C	0.565904	-0.0642344	0.628533	FALSE	74483791	0.000535473	0.0266815	1.49556e-06	0.114173	TRUE
SEBORRHOEIC	Genus Micrococcus	Moist	rs1189820	A	G	0.805195	0.0660602	0.0464812	FALSE	57054141	0.00909087	0.0602296	2.77943e-06	0.167042	TRUE
SEBORRHOEIC	Genus Micrococcus	Moist	rs2745431	C	G	0.515066	0.0287873	0.274175	FALSE	132687868	0.0105411	0.0287233	4.89496e-06	0.109742	TRUE
SEBORRHOEIC	Genus Micrococcus	Moist	rs11893980	T	C	0.802869	0.048104	0.0683184	FALSE	109125590	0.0115333	0.0510452	1.09186e-06	0.159785	TRUE
SEBORRHOEIC	Genus Micrococcus	Moist	rs28533187	G	C	-0.498802	-0.0170151	0.258573	FALSE	61488702	0.018834	0.0295707	4.31619e-06	0.105637	TRUE
SEBORRHOEIC	Genus Micrococcus	Moist	rs4502906	A	G	0.44283	0.0148864	0.419002	FALSE	92157501	0.0188503	0.0259039	5.91205e-06	0.0952212	TRUE
SEBORRHOEIC	Genus Micrococcus	Moist	rs12050699	G	T	0.503141	-0.0131539	0.612505	FALSE	69641266	0.0206391	0.0264652	2.30939e-06	0.103499	TRUE
SEBORRHOEIC	Genus Micrococcus	Moist	rs2280613	A	G	0.544006	0.0055035	0.27194	FALSE	70290755	0.0282721	0.0287447	1.95959e-06	0.111079	TRUE
SEBORRHOEIC	Genus Micrococcus	Moist	rs10179400	T	C	-0.658274	0.436115	0.777839	FALSE	45161173	0.000451648	0.124324	5.89202e-07	0.127015	TRUE
SEBORRHOEIC	Genus Micrococcus	Moist	rs10179400	T	C	-0.658274	-0.083642	0.777274	FALSE	45161173	0.0371792	0.0401393	5.89202e-07	0.127015	TRUE
SEBORRHOEIC	Genus Micrococcus	Moist	rs62014062	C	T	0.752958	-0.0537333	0.116944	FALSE	46545573	0.0208204	0.0232488	2.30127e-06	0.153915	TRUE
SEBORRHOEIC	Genus Micrococcus	Moist	rs34581318	T	G	-0.713963	0.0750176	0.145028	FALSE	146802776	0.0153335	0.0309426	5.27128e-06	0.151993	TRUE
SEBORRHOEIC	Genus Micrococcus	Moist	rs716073	A	C	0.769835	-0.0504504	0.108271	FALSE	26467198	0.0138886	0.0205072	5.65581e-06	0.164306	TRUE
SEBORRHOEIC	Genus Micrococcus	Moist	rs10179400	T	C	-0.658274	0.019047	0.777402	FALSE	45161173	0.0335985	0.00896392	5.89202e-07	0.127015	TRUE
SEBORRHOEIC	Genus Staphylococcus	Dry	rs62014062	C	T	0.752958	0.396746	0.116944	FALSE	46545573	0.00460225	0.140013	2.30127e-06	0.153915	TRUE
SEBORRHOEIC	Genus Staphylococcus	Dry	rs716073	A	C	0.769835	-0.359782	0.108198	FALSE	26467198	0.0361002	0.171669	5.65581e-06	0.164306	TRUE
SEBORRHOEIC	Genus Staphylococcus	Dry	rs5768971	A	G	-0.492199	-0.0224053	0.638929	FALSE	46571720	0.00149822	0.0155575	2.75151e-06	0.101405	TRUE
SEBORRHOEIC	Genus Staphylococcus	Dry	rs716073	A	C	0.769835	0.024882	0.108291	FALSE	26467198	0.00301454	0.0240796	5.65581e-06	0.164306	TRUE
SEBORRHOEIC	Genus Staphylococcus	Dry	rs62014062	C	T	0.752958	-0.0148816	0.116872	FALSE	46545573	0.0052761	0.0235596	2.30127e-06	0.153915	TRUE
SEBORRHOEIC	Genus Staphylococcus	Dry	rs10747263	T	G	-0.47831	0.0100419	0.722233	FALSE	121491442	0.0054764	0.0167003	7.68307e-06	0.103715	TRUE
SEBORRHOEIC	Genus Staphylococcus	Dry	rs34581318	T	G	-0.713963	-0.00974506	0.144951	FALSE	146802776	0.00646895	0.0212737	5.27128e-06	0.151993	TRUE
SEBORRHOEIC	Genus Staphylococcus	Dry	rs10179400	T	C	-0.658274	-0.00723134	0.77746	FALSE	45161173	0.00687499	0.0179772	5.89202e-07	0.127015	TRUE
SEBORRHOEIC	Family Neisseriaceae	Sebaceous	rs73111893	A	C	0.664653	-0.00335127	0.0881765	FALSE	52891746	0.00899099	0.0264297	7.97863e-06	0.144423	TRUE
SEBORRHOEIC	Family Neisseriaceae	Sebaceous	rs10179400	T	C	-0.658274	0.0261623	0.777041	FALSE	45161173	0.00109169	0.0136108	5.89202e-07	0.127015	TRUE
SEBORRHOEIC	Family Neisseriaceae	Sebaceous	rs716073	A	C	0.769835	-0.0348224	0.107818	FALSE	26467198	0.0011382	0.0182891	5.65581e-06	0.164306	TRUE
SEBORRHOEIC	Family Neisseriaceae	Sebaceous	rs10747263	T	G	-0.47831	-0.0181214	0.722621	FALSE	121491442	0.00303424	0.0126413	7.68307e-06	0.103715	TRUE
SEBORRHOEIC	Family Neisseriaceae	Sebaceous	rs62014062	C	T	0.752958	-0.0226921	0.116971	FALSE	46545573	0.00406852	0.0178418	2.30127e-06	0.153915	TRUE
SEBORRHOEIC	Family Rhodobacteraceae	Moist	rs73111893	A	C	0.664653	0.0163179	0.0877038	FALSE	52891746	0.00829488	0.0200079	7.97863e-06	0.144423	TRUE
SEBORRHOEIC	Family Rhodobacteraceae	Moist	rs34581318	T	G	-0.713963	-0.00718573	0.144693	FALSE	146802776	0.0131483	0.0162028	5.27128e-06	0.151993	TRUE
SEBORRHOEIC	Family Rhodobacteraceae	Moist	rs5768971	A	G	-0.492199	4.17425e-05	0.638696	FALSE	46571720	0.0199434	0.0117722	2.75151e-06	0.101405	TRUE
SEBORRHOEIC	Family Rhodobacteraceae	Moist	rs10179400	T	C	-0.658274	-0.0878185	0.776644	FALSE	45161173	0.000112702	0.0309195	5.89202e-07	0.127015	TRUE
SEBORRHOEIC	Family Rhodobacteraceae	Moist	rs10747263	T	G	-0.47831	-0.0668891	0.72279	FALSE	121491442	0.000547897	0.029186	7.68307e-06	0.103715	TRUE
SEBORRHOEIC	Family Rhodobacteraceae	Moist	rs62014062	C	T	0.752958	-0.0501687	0.117064	FALSE	46545573	0.00558647	0.0412103	2.30127e-06	0.153915	TRUE

## Sheet: Table S2
Table S2. Detailed information for instrumental variables between SADs and gut microbiota in the forward MR
Outcome	Exposure	SNP	Effect_allele	Other_allele	Beta.exposure	Beta.outcome	Eaf.outcome	Palindromic	Pos.outcome	Pval.outcome	Se.outcome	Pval.exposure	Se.exposure	Mr_keep
DISORDSKINAPPENDIX	Phylum Actinobacteria	rs8092906	C	T	0.530748	0.0261639	0.255255	FALSE	8562925	0.0096462	0.0301715	8.3683e-07	0.10403	TRUE
DISORDSKINAPPENDIX	Phylum Actinobacteria	rs888627	G	A	-0.522056	0.0191847	0.688698	FALSE	2224300	0.0125203	0.0284971	6.73593e-06	0.112571	TRUE
DISORDSKINAPPENDIX	Phylum Actinobacteria	rs4661618	C	T	-0.456216	-0.0162371	0.535757	FALSE	15274303	0.0134139	0.0262723	4.49402e-06	0.09644	TRUE
DISORDSKINAPPENDIX	Phylum Actinobacteria	rs11698230	T	C	-1.00763	-0.0272132	0.0843245	FALSE	22785831	0.0141438	0.0473834	2.40312e-06	0.20663	TRUE
DISORDSKINAPPENDIX	Phylum Actinobacteria	rs36003281	G	A	0.498129	-0.0123226	0.472488	FALSE	180169685	0.0159783	0.026279	1.37076e-06	0.0997372	TRUE
DISORDSKINAPPENDIX	Phylum Actinobacteria	rs35024339	T	C	0.906078	-0.0176742	0.0457324	FALSE	126404133	0.0194437	0.0626181	7.77983e-06	0.196664	TRUE
DISORDSKINAPPENDIX	Phylum Actinobacteria	rs10013895	C	T	-0.848996	0.00854957	0.875882	FALSE	5235196	0.0207658	0.0399713	7.28208e-06	0.183932	TRUE
DISORDSKINAPPENDIX	Phylum Actinobacteria	rs10818151	C	T	0.498176	0.00461998	0.422733	FALSE	118420276	0.0215388	0.0264907	1.27265e-06	0.099404	TRUE
DISORDSKINAPPENDIX	Phylum Actinobacteria	rs10061628	A	C	-0.528797	0.00449904	0.374517	FALSE	103907015	0.0217176	0.0272168	5.36335e-06	0.112709	TRUE
DISORDSKINAPPENDIX	Phylum Actinobacteria	rs12358632	T	C	0.907382	-0.00603557	0.045282	FALSE	82351703	0.0231179	0.0638728	2.623e-06	0.18668	TRUE
DISORDSKINAPPENDIX	Phylum Actinobacteria	rs10818151	C	T	0.498176	-0.0623606	0.422554	FALSE	118420276	0.000554853	0.0260439	1.27265e-06	0.099404	TRUE
DISORDSKINAPPENDIX	Phylum Actinobacteria	rs12448418	T	C	1.24817	-0.110332	0.0663736	FALSE	57504782	0.00107285	0.0515064	3.91338e-06	0.262329	TRUE
DISORDSKINAPPENDIX	Phylum Actinobacteria	rs10061628	A	C	-0.528797	-0.052494	0.374381	FALSE	103907015	0.00167382	0.0268082	5.36335e-06	0.112709	TRUE
DISORDSKINAPPENDIX	Phylum Actinobacteria	rs10944582	A	C	0.503433	-0.0435325	0.516473	FALSE	92276645	0.00303109	0.0257513	6.51003e-07	0.0976406	TRUE
DISORDSKINAPPENDIX	Phylum Actinobacteria	rs10013895	C	T	-0.848996	-0.0604407	0.875806	FALSE	5235196	0.0041295	0.0392811	7.28208e-06	0.183932	TRUE
DISORDSKINAPPENDIX	Phylum Actinobacteria	rs11698230	T	C	-1.00763	0.057914	0.0844085	FALSE	22785831	0.0069742	0.046121	2.40312e-06	0.20663	TRUE
DISORDSKINAPPENDIX	Phylum Actinobacteria	rs36003281	G	A	0.498129	0.0297605	0.472621	FALSE	180169685	0.00828227	0.0257873	1.37076e-06	0.0997372	TRUE
DISORDSKINAPPENDIX	Phylum Actinobacteria	rs888627	G	A	-0.522056	0.027781	0.688725	FALSE	2224300	0.0107148	0.0280192	6.73593e-06	0.112571	TRUE
DISORDSKINAPPENDIX	Class Actinobacteria	rs2024372	A	G	0.453504	0.0219676	0.486866	FALSE	7743288	0.0132183	0.0259113	4.24854e-06	0.0956884	TRUE
DISORDSKINAPPENDIX	Class Actinobacteria	rs12358632	T	C	0.907382	0.0266246	0.04529	FALSE	82351703	0.0223812	0.0627675	2.623e-06	0.18668	TRUE
DISORDSKINAPPENDIX	Class Actinobacteria	rs8092906	C	T	0.530748	0.0089723	0.255255	FALSE	8562925	0.0253835	0.0295623	8.3683e-07	0.10403	TRUE
DISORDSKINAPPENDIX	Class Actinobacteria	rs4661618	C	T	-0.456216	-0.00740164	0.535785	FALSE	15274303	0.0258171	0.0258367	4.49402e-06	0.09644	TRUE
DISORDSKINAPPENDIX	Class Actinobacteria	rs35024339	T	C	0.906078	0.00698672	0.0457566	FALSE	126404133	0.0302942	0.0610096	7.77983e-06	0.196664	TRUE
DISORDSKINAPPENDIX	Class Actinobacteria	rs17166951	A	C	0.877411	-0.00232903	0.0418139	FALSE	13262429	0.0323758	0.0646762	1.87875e-06	0.178253	TRUE
DISORDSKINAPPENDIX	Class Actinobacteria	rs10163217	A	G	-0.63526	0.0836904	0.33217	FALSE	27094056	0.000109423	0.0284666	4.94e-06	0.132941	TRUE
DISORDSKINAPPENDIX	Class Actinobacteria	rs72804668	G	T	1.11955	0.0739547	0.119367	FALSE	84385138	0.00258654	0.0419053	3.85e-08	0.190847	TRUE
DISORDSKINAPPENDIX	Class Actinobacteria	rs72702607	A	G	1.20208	0.083144	0.0878535	FALSE	12662833	0.00293257	0.0487314	9.42e-06	0.260037	TRUE
DISORDSKINAPPENDIX	Class Actinobacteria	rs4823241	A	T	0.519407	0.0439406	0.679576	FALSE	44546187	0.00441123	0.0291974	7.28e-06	0.110858	TRUE
DISORDSKINAPPENDIX	Class Actinobacteria	rs34768789	G	A	0.713309	-0.0487785	0.178824	FALSE	233229353	0.00577237	0.0358116	3.11e-06	0.145923	TRUE
DISORDSKINAPPENDIX	Class Actinobacteria	rs13159922	T	C	0.782664	0.0546854	0.096536	FALSE	164064108	0.00809293	0.0468178	8.39e-06	0.16828	TRUE
DISORDSKINAPPENDIX	Class Actinobacteria	rs7439390	T	C	0.569697	-0.0281195	0.384601	FALSE	7367298	0.0108205	0.0285472	7.04e-06	0.121378	TRUE
DISORDSKINAPPENDIX	Class Actinobacteria	rs75650848	C	T	0.93427	-0.0681591	0.026425	FALSE	107704657	0.0144151	0.0868265	3.15e-06	0.191254	TRUE
DISORDSKINAPPENDIX	Class Actinobacteria	rs77190854	G	A	1.04585	0.0277676	0.14486	FALSE	24581341	0.0156543	0.0384016	7.3e-06	0.223247	TRUE
DISORDSKINAPPENDIX	Class Actinobacteria	rs755772	C	T	0.588333	-0.0105343	0.268497	FALSE	141721519	0.024346	0.0305677	3.89e-06	0.121678	TRUE
DISORDSKINAPPENDIX	Class Actinobacteria	rs712349	G	A	0.745722	0.0101633	0.134798	FALSE	36823941	0.026677	0.0401797	3.45e-06	0.15333	TRUE
DISORDSKINAPPENDIX	Class Actinobacteria	rs7636212	G	A	0.679342	-0.00473847	0.739374	FALSE	32984379	0.0292945	0.0310828	5.33e-06	0.142707	TRUE
DISORDSKINAPPENDIX	Class Actinobacteria	rs10774824	G	A	-0.567004	0.00292415	0.466216	FALSE	109649211	0.0304898	0.0272982	3.24e-06	0.116227	TRUE
DISORDSKINAPPENDIX	Class Actinobacteria	rs72804668	G	T	1.11955	0.336566	0.119736	FALSE	84385138	0.00122747	0.155737	3.85335e-08	0.190847	TRUE
DISORDSKINAPPENDIX	Order Bifidobacteriales	rs13159922	T	C	0.782664	-0.354917	0.095938	FALSE	164064108	0.00173664	0.175729	8.39013e-06	0.16828	TRUE
DISORDSKINAPPENDIX	Order Bifidobacteriales	rs77190854	G	A	1.04585	0.272067	0.144766	FALSE	24581341	0.00247275	0.145678	7.29809e-06	0.223247	TRUE
DISORDSKINAPPENDIX	Order Bifidobacteriales	rs34768789	G	A	0.713309	-0.173968	0.178025	FALSE	233229353	0.00789648	0.134968	3.10703e-06	0.145923	TRUE
DISORDSKINAPPENDIX	Order Bifidobacteriales	rs7439390	T	C	0.569697	-0.0996492	0.384441	FALSE	7367298	0.0140685	0.107003	7.03558e-06	0.121378	TRUE
DISORDSKINAPPENDIX	Order Bifidobacteriales	rs712349	G	A	0.745722	0.082359	0.135094	FALSE	36823941	0.0233149	0.149963	3.45061e-06	0.15333	TRUE
DISORDSKINAPPENDIX	Order Bifidobacteriales	rs10163217	A	G	-0.63526	0.0517484	0.332823	FALSE	27094056	0.0252644	0.107931	4.93763e-06	0.132941	TRUE
DISORDSKINAPPENDIX	Order Bifidobacteriales	rs755772	C	T	0.588333	-0.0547093	0.268698	FALSE	141721519	0.025313	0.114513	3.89019e-06	0.121678	TRUE
DISORDSKINAPPENDIX	Order Bifidobacteriales	rs10774824	G	A	-0.567004	0.0397662	0.465825	FALSE	109649211	0.0278447	0.101817	3.23932e-06	0.116227	TRUE
DISORDSKINAPPENDIX	Order Bifidobacteriales	rs75650848	C	T	0.93427	0.0981228	0.0264897	FALSE	107704657	0.0304082	0.321491	3.15054e-06	0.191254	TRUE
DISORDSKINAPPENDIX	Order Bifidobacteriales	rs72702607	A	G	1.20208	0.0354702	0.0877824	FALSE	12662833	0.0338428	0.18271	9.42329e-06	0.260037	TRUE
DISORDSKINAPPENDIX	Order Bifidobacteriales	rs4823241	A	T	0.519407	-0.00955085	0.680211	FALSE	44546187	0.0372002	0.108731	7.28008e-06	0.110858	TRUE
DISORDSKINAPPENDIX	Order Bifidobacteriales	rs7636212	G	A	0.679342	-0.00183441	0.73947	FALSE	32984379	0.0394953	0.11599	5.32691e-06	0.142707	TRUE
DISORDSKINAPPENDIX	Order Bifidobacteriales	rs4749499	C	A	0.646333	0.216699	0.112663	FALSE	29872458	0.00691528	0.0802321	6.19444e-06	0.140388	TRUE
DISORDSKINAPPENDIX	Order Bifidobacteriales	rs10132077	C	A	0.45111	0.0340726	0.258052	FALSE	58547253	0.00861014	0.0129694	4.91568e-06	0.096883	TRUE
DISORDSKINAPPENDIX	Order Bifidobacteriales	rs7568063	C	T	0.480841	-0.0725916	0.20299	FALSE	225976115	0.03459	0.0343527	5.67815e-06	0.10403	TRUE
DISORDSKINAPPENDIX	Order Bifidobacteriales	rs7568063	C	T	0.480841	0.0384376	0.203109	FALSE	225976115	0.0386768	0.0185904	5.67815e-06	0.10403	TRUE
DISORDSKINAPPENDIX	Order Bifidobacteriales	rs10132077	C	A	0.45111	0.0547953	0.258202	FALSE	58547253	0.0100807	0.0212959	4.91568e-06	0.096883	TRUE
DISORDSKINAPPENDIX	Order Bifidobacteriales	rs4749499	C	A	0.646333	0.025236	0.1127	FALSE	29872458	0.032201	0.011782	6.19444e-06	0.140388	TRUE
DISORDSKINAPPENDIX	Order Bifidobacteriales	rs7572053	G	A	-0.397905	0.0646621	0.688538	FALSE	174699948	0.0389215	0.0313131	7.33909e-06	0.0870482	TRUE
DISORDSKINAPPENDIX	Order Bifidobacteriales	rs7568063	C	T	0.480841	-0.0189513	0.203096	FALSE	225976115	0.00313186	0.0187905	5.67815e-06	0.10403	TRUE
DISORDSKINAPPENDIX	Order Enterobacteriales	rs10132077	C	A	0.45111	0.0159318	0.258113	FALSE	58547253	0.00350296	0.0170573	4.91568e-06	0.096883	TRUE
DISORDSKINAPPENDIX	Order Enterobacteriales	rs7572053	G	A	-0.397905	-0.0145182	0.688627	FALSE	174699948	0.00370475	0.0162109	7.33909e-06	0.0870482	TRUE
DISORDSKINAPPENDIX	Order Enterobacteriales	rs4749499	C	A	0.646333	0.00479426	0.112675	FALSE	29872458	0.0083983	0.0237209	6.19444e-06	0.140388	TRUE
DISORDSKINAPPENDIX	Order Enterobacteriales	rs7568063	C	T	0.480841	-0.0383881	0.203508	FALSE	225976115	0.000147062	0.0143217	5.67815e-06	0.10403	TRUE
DISORDSKINAPPENDIX	Order Enterobacteriales	rs10132077	C	A	0.45111	0.0088772	0.257771	FALSE	58547253	0.00986684	0.0129594	4.91568e-06	0.096883	TRUE
DISORDSKINAPPENDIX	Order Enterobacteriales	rs4749499	C	A	0.646333	-0.00776461	0.112984	FALSE	29872458	0.0133213	0.0179923	6.19444e-06	0.140388	TRUE
DISORDSKINAPPENDIX	Order Enterobacteriales	rs7572053	G	A	-0.397905	-0.000392481	0.688303	FALSE	174699948	0.0194908	0.012298	7.33909e-06	0.0870482	TRUE
DISORDSKINAPPENDIX	Order Lactobacillales	rs4749499	C	A	0.646333	0.0192702	0.113137	FALSE	29872458	0.0160991	0.041696	6.19444e-06	0.140388	TRUE
DISORDSKINAPPENDIX	Order Lactobacillales	rs10132077	C	A	0.45111	0.00809235	0.257729	FALSE	58547253	0.0196756	0.029952	4.91568e-06	0.096883	TRUE
DISORDSKINAPPENDIX	Order Lactobacillales	rs7568063	C	T	0.480841	0.00354182	0.203892	FALSE	225976115	0.0228677	0.0330695	5.67815e-06	0.10403	TRUE
DISORDSKINAPPENDIX	Order Lactobacillales	rs7572053	G	A	-0.397905	0.00147066	0.688205	FALSE	174699948	0.0239703	0.0284766	7.33909e-06	0.0870482	TRUE
DISORDSKINAPPENDIX	Order Lactobacillales	rs7568063	C	T	0.480841	-0.0925063	0.203722	FALSE	225976115	0.000163293	0.0328781	5.67815e-06	0.10403	TRUE
DISORDSKINAPPENDIX	Order Lactobacillales	rs7572053	G	A	-0.397905	-0.0441078	0.688115	FALSE	174699948	0.00382303	0.0279614	7.33909e-06	0.0870482	TRUE
DISORDSKINAPPENDIX	Order Lactobacillales	rs10132077	C	A	0.45111	0.0284844	0.257766	FALSE	58547253	0.0111002	0.0294238	4.91568e-06	0.096883	TRUE
DISORDSKINAPPENDIX	Order Lactobacillales	rs4749499	C	A	0.646333	-0.0134442	0.113087	FALSE	29872458	0.0247702	0.0410208	6.19444e-06	0.140388	TRUE
DISORDSKINAPPENDIX	Order Lactobacillales	rs12607709	A	G	0.824745	-0.0492006	0.122367	FALSE	47969206	0.0077906	0.041316	6.35e-06	0.175167	TRUE
DISORDSKINAPPENDIX	Order Lactobacillales	rs74635048	A	T	0.891025	0.0303592	0.165594	FALSE	68879156	0.0135581	0.0365931	1.2e-07	0.158926	TRUE
DISORDSKINAPPENDIX	Order Lactobacillales	rs72794193	G	A	0.870948	0.0270453	0.116425	FALSE	83033019	0.0174454	0.0423793	4.23e-06	0.181264	TRUE
DISORDSKINAPPENDIX	Order Lactobacillales	rs73214486	C	T	0.884528	-0.0185374	0.175916	FALSE	93027707	0.0201096	0.0356709	3.28e-07	0.164182	TRUE
DISORDSKINAPPENDIX	Order Lactobacillales	rs6966233	G	A	0.859236	-0.0207993	0.100179	FALSE	146020726	0.0215998	0.0455572	4.6e-06	0.179571	TRUE
DISORDSKINAPPENDIX	Order Lactobacillales	rs10191519	A	C	1.05695	0.0186824	0.0973705	FALSE	206733931	0.0227738	0.0457809	9.51e-06	0.229216	TRUE
DISORDSKINAPPENDIX	Order Lactobacillales	rs35914742	C	T	-0.586422	-0.00933531	0.353602	FALSE	122788701	0.0247229	0.0283212	3.47e-06	0.120876	TRUE
DISORDSKINAPPENDIX	Order Mollicutesrf9	rs9968381	T	C	0.76314	0.00976423	0.0743852	FALSE	56692260	0.0283976	0.0523101	9.62e-06	0.165593	TRUE
DISORDSKINAPPENDIX	Order Mollicutesrf9	rs9968381	T	C	0.76314	0.271246	0.0741932	FALSE	56692260	0.00671684	0.19671	9.61677e-06	0.165593	TRUE
DISORDSKINAPPENDIX	Order Mollicutesrf9	rs74635048	A	T	0.891025	0.18745	0.166393	FALSE	68879156	0.00672028	0.135968	1.19835e-07	0.158926	TRUE
DISORDSKINAPPENDIX	Order Mollicutesrf9	rs35914742	C	T	-0.586422	0.124998	0.35324	FALSE	122788701	0.00956012	0.106157	3.47125e-06	0.120876	TRUE
DISORDSKINAPPENDIX	Order Mollicutesrf9	rs73214486	C	T	0.884528	-0.123754	0.176192	FALSE	93027707	0.0141462	0.133425	3.27571e-07	0.164182	TRUE
DISORDSKINAPPENDIX	Order Mollicutesrf9	rs72794193	G	A	0.870948	0.109255	0.116693	FALSE	83033019	0.0194927	0.157296	4.23094e-06	0.181264	TRUE
DISORDSKINAPPENDIX	Order Mollicutesrf9	rs6966233	G	A	0.859236	-0.105676	0.0998607	FALSE	146020726	0.021545	0.17186	4.603e-06	0.179571	TRUE
DISORDSKINAPPENDIX	Order Mollicutesrf9	rs10191519	A	C	1.05695	0.0168453	0.0972467	FALSE	206733931	0.0368917	0.172692	9.51317e-06	0.229216	TRUE
DISORDSKINAPPENDIX	Order Mollicutesrf9	rs12607709	A	G	0.824745	-0.000396625	0.123077	FALSE	47969206	0.0399176	0.153633	6.35193e-06	0.175167	TRUE
DISORDSKINAPPENDIX	Order Mollicutesrf9	rs74580141	C	G	1.09663	-0.0856676	0.0676156	FALSE	157111176	0.0038579	0.054464	5.26e-07	0.207753	TRUE
DISORDSKINAPPENDIX	Order Mollicutesrf9	rs6916271	A	G	0.75726	0.0481533	0.236768	FALSE	100853086	0.004337	0.0318123	4.39e-06	0.158002	TRUE
DISORDSKINAPPENDIX	Order Mollicutesrf9	rs888968	C	T	-0.560718	0.0371323	0.569299	FALSE	115460603	0.00585173	0.0274124	5.2e-06	0.117978	TRUE
DISORDSKINAPPENDIX	Order Mollicutesrf9	rs35387257	G	A	0.783959	-0.0403827	0.165429	FALSE	86207990	0.00903663	0.0366937	5.07e-06	0.164732	TRUE
DISORDSKINAPPENDIX	Family Bifidobacteriaceae	rs6504646	A	G	0.567646	0.0194817	0.337936	FALSE	50286406	0.0165962	0.0287418	8.71e-06	0.122612	TRUE
DISORDSKINAPPENDIX	Family Bifidobacteriaceae	rs7294425	G	A	0.632491	-0.0214176	0.825722	FALSE	120295278	0.0184276	0.0360853	9.9e-06	0.137536	TRUE
DISORDSKINAPPENDIX	Family Bifidobacteriaceae	rs1421895	A	T	0.569074	-0.00821054	0.253048	FALSE	141718558	0.0264065	0.0311642	7.71e-06	0.122147	TRUE
DISORDSKINAPPENDIX	Family Bifidobacteriaceae	rs6504646	A	G	0.567646	0.180103	0.337808	FALSE	50286406	0.00377929	0.107703	8.70769e-06	0.122612	TRUE
DISORDSKINAPPENDIX	Family Bifidobacteriaceae	rs7294425	G	A	0.632491	-0.130669	0.825954	FALSE	120295278	0.0132176	0.134264	9.8952e-06	0.137536	TRUE
DISORDSKINAPPENDIX	Family Bifidobacteriaceae	rs35387257	G	A	0.783959	-0.0957266	0.165911	FALSE	86207990	0.0193853	0.136973	5.06752e-06	0.164732	TRUE
DISORDSKINAPPENDIX	Family Bifidobacteriaceae	rs888968	C	T	-0.560718	0.0581669	0.569634	FALSE	115460603	0.0227664	0.102174	5.20262e-06	0.117978	TRUE
DISORDSKINAPPENDIX	Family Bifidobacteriaceae	rs74580141	C	G	1.09663	-0.10235	0.0675773	FALSE	157111176	0.0244993	0.202059	5.25559e-07	0.207753	TRUE
DISORDSKINAPPENDIX	Family Bifidobacteriaceae	rs1421895	A	T	0.569074	-0.0313788	0.253249	FALSE	141718558	0.0315191	0.116677	7.70955e-06	0.122147	TRUE
DISORDSKINAPPENDIX	Family Bifidobacteriaceae	rs6916271	A	G	0.75726	-0.0212695	0.236354	FALSE	100853086	0.0343382	0.119263	4.39319e-06	0.158002	TRUE
DISORDSKINAPPENDIX	Family Bifidobacteriaceae	rs10973339	A	T	-0.616153	0.0428795	0.325489	FALSE	37444994	0.00466543	0.0290525	5.95e-06	0.131515	TRUE
DISORDSKINAPPENDIX	Family Bifidobacteriaceae	rs2830113	T	C	0.918889	0.0210522	0.108276	FALSE	26202163	0.0211587	0.0443171	9.71e-07	0.180339	TRUE
DISORDSKINAPPENDIX	Family Bifidobacteriaceae	rs77618664	T	C	0.8886	0.0185381	0.109272	FALSE	188689349	0.0223744	0.0436749	2.89e-06	0.183171	TRUE
DISORDSKINAPPENDIX	Family Bifidobacteriaceae	rs2784606	T	G	0.83717	-0.0245898	0.0563835	FALSE	10523991	0.0226032	0.0592434	1.25e-06	0.166106	TRUE
DISORDSKINAPPENDIX	Family Bifidobacteriaceae	rs210388	A	G	0.567038	0.0086038	0.657628	FALSE	53632982	0.0254747	0.0286873	3.95e-06	0.118639	TRUE
DISORDSKINAPPENDIX	Family Bifidobacteriaceae	rs10148195	T	C	0.831856	0.0106518	0.163296	FALSE	50014438	0.0257379	0.0367834	2.68e-07	0.154806	TRUE
DISORDSKINAPPENDIX	Family Bifidobacteriaceae	rs10781032	A	G	0.92097	-0.00947537	0.159345	FALSE	71645896	0.0266174	0.0371202	9.22e-06	0.200997	TRUE
DISORDSKINAPPENDIX	Family Bifidobacteriaceae	rs10973339	A	T	-0.616153	0.121319	0.32756	FALSE	37444994	0.0106326	0.109026	5.94647e-06	0.131515	TRUE
DISORDSKINAPPENDIX	Family Bifidobacteriaceae	rs210388	A	G	0.567038	-0.0932964	0.657991	FALSE	53632982	0.0153163	0.106923	3.95303e-06	0.118639	TRUE
DISORDSKINAPPENDIX	Family Bifidobacteriaceae	rs2830113	T	C	0.918889	-0.0953206	0.107907	FALSE	26202163	0.0226387	0.166064	9.70784e-07	0.180339	TRUE
DISORDSKINAPPENDIX	Family Enterobacteriaceae	rs77618664	T	C	0.8886	0.0598453	0.10923	FALSE	188689349	0.0286555	0.164731	2.88936e-06	0.183171	TRUE
DISORDSKINAPPENDIX	Family Enterobacteriaceae	rs10781032	A	G	0.92097	-0.0264285	0.159792	FALSE	71645896	0.0339913	0.13954	9.22152e-06	0.200997	TRUE
DISORDSKINAPPENDIX	Family Enterobacteriaceae	rs10148195	T	C	0.831856	-0.0241876	0.163562	FALSE	50014438	0.0344076	0.137326	2.68484e-07	0.154806	TRUE
DISORDSKINAPPENDIX	Family Enterobacteriaceae	rs2784606	T	G	0.83717	0.038285	0.0562267	FALSE	10523991	0.0344822	0.220335	1.24705e-06	0.166106	TRUE
DISORDSKINAPPENDIX	Family Enterobacteriaceae	rs12602381	G	A	-0.976323	-0.128563	0.0616507	FALSE	5784249	0.000774603	0.0566483	3.8e-06	0.206493	TRUE
DISORDSKINAPPENDIX	Family Enterobacteriaceae	rs6468581	T	A	0.429669	0.0425835	0.608165	FALSE	86957264	0.00420687	0.0278462	1.34e-06	0.0867134	TRUE
DISORDSKINAPPENDIX	Family Enterobacteriaceae	rs9975931	A	T	-0.399861	0.0389328	0.431274	FALSE	24645277	0.00521623	0.0274757	3.35e-06	0.0840744	TRUE
DISORDSKINAPPENDIX	Family Lachnospiraceae	rs4964363	T	C	-0.434837	0.0402126	0.286408	FALSE	105386121	0.00604803	0.0300917	7.11e-06	0.0947846	TRUE
DISORDSKINAPPENDIX	Family Lachnospiraceae	rs74889211	T	C	-0.697653	0.0614074	0.0791313	FALSE	132716842	0.00768197	0.051208	2.12e-06	0.143668	TRUE
DISORDSKINAPPENDIX	Family Lachnospiraceae	rs907646	A	G	0.391549	0.0243658	0.350403	FALSE	106447754	0.0131661	0.028645	8.56e-06	0.0861422	TRUE
DISORDSKINAPPENDIX	Family Lachnospiraceae	rs11874270	G	A	-0.417669	-0.0193748	0.461415	FALSE	73396651	0.0159434	0.0273256	9.65e-07	0.0831286	TRUE
DISORDSKINAPPENDIX	Family Lachnospiraceae	rs78402294	G	T	-0.683206	0.0206553	0.0646536	FALSE	22063006	0.0237219	0.0558808	7.82e-06	0.149626	TRUE
DISORDSKINAPPENDIX	Family Lachnospiraceae	rs61803299	C	A	0.461571	0.00874757	0.314048	FALSE	169082453	0.0254928	0.029236	6.46e-06	0.10014	TRUE
DISORDSKINAPPENDIX	Family Lachnospiraceae	rs2125301	A	C	0.446085	-0.00686955	0.655009	FALSE	92213664	0.0270066	0.028603	7.27e-06	0.0973439	TRUE
DISORDSKINAPPENDIX	Family Lachnospiraceae	rs907646	A	G	0.391549	0.182468	0.350316	FALSE	106447754	0.00351261	0.106892	8.56051e-06	0.0861422	TRUE
DISORDSKINAPPENDIX	Family Lachnospiraceae	rs9975931	A	T	-0.399861	0.147641	0.431006	FALSE	24645277	0.00606148	0.102948	3.34518e-06	0.0840744	TRUE
DISORDSKINAPPENDIX	Family Lachnospiraceae	rs74889211	T	C	-0.697653	-0.248255	0.0786267	FALSE	132716842	0.00799692	0.193681	2.11756e-06	0.143668	TRUE
DISORDSKINAPPENDIX	Family Lachnospiraceae	rs4964363	T	C	-0.434837	-0.140199	0.286234	FALSE	105386121	0.0084764	0.11231	7.10868e-06	0.0947846	TRUE
DISORDSKINAPPENDIX	Family Lachnospiraceae	rs11874270	G	A	-0.417669	-0.112403	0.461606	FALSE	73396651	0.0108682	0.102264	9.64735e-07	0.0831286	TRUE
DISORDSKINAPPENDIX	Family Lachnospiraceae	rs12602381	G	A	-0.976323	0.133377	0.061211	FALSE	5784249	0.0211322	0.21151	3.79608e-06	0.206493	TRUE
DISORDSKINAPPENDIX	Family Lachnospiraceae	rs78402294	G	T	-0.683206	-0.132169	0.0645996	FALSE	22063006	0.0212344	0.2109	7.8165e-06	0.149626	TRUE
DISORDSKINAPPENDIX	Family Lachnospiraceae	rs2125301	A	C	0.446085	-0.0543377	0.654453	FALSE	92213664	0.0243988	0.10652	7.26908e-06	0.0973439	TRUE
DISORDSKINAPPENDIX	Family Lachnospiraceae	rs6468581	T	A	0.429669	-0.0292363	0.607577	FALSE	86957264	0.0311643	0.104236	1.33677e-06	0.0867134	TRUE
DISORDSKINAPPENDIX	Genus Allisonella	rs61803299	C	A	0.461571	-0.0251754	0.31476	FALSE	169082453	0.0327364	0.109653	6.46095e-06	0.10014	TRUE
DISORDSKINAPPENDIX	Genus Allisonella	rs77561070	T	C	0.938472	0.078259	0.173394	FALSE	159192055	0.0479921	0.039576	1.43853e-06	0.1861	TRUE
DISORDSKINAPPENDIX	Genus Allisonella	rs2962117	C	T	0.667574	-0.2794	0.781036	FALSE	126298467	0.0180867	0.118198	1.86129e-06	0.133564	TRUE
DISORDSKINAPPENDIX	Genus Allisonella	rs79026482	A	G	1.23782	-0.0615732	0.0758665	FALSE	20896093	0.0342279	0.02908	1.73108e-06	0.246642	TRUE
DISORDSKINAPPENDIX	Genus Allisonella	rs79026482	A	G	1.23782	0.086132	0.0758515	FALSE	20896093	0.0195713	0.0368959	1.73108e-06	0.246642	TRUE
DISORDSKINAPPENDIX	Genus Allisonella	rs4865815	A	G	0.710367	0.0654115	0.129542	FALSE	54332877	0.0230425	0.028781	9.88957e-06	0.154738	TRUE
DISORDSKINAPPENDIX	Genus Allisonella	rs113937364	A	G	0.9998	-0.386436	0.0498313	FALSE	21337753	0.0165082	0.161184	4.03552e-06	0.207944	TRUE
DISORDSKINAPPENDIX	Genus Allisonella	rs79026482	A	G	1.23782	-0.0892858	0.0758366	FALSE	20896093	0.0316643	0.041555	1.73108e-06	0.246642	TRUE
DISORDSKINAPPENDIX	Genus Bifidobacterium	rs113937364	A	G	0.9998	0.180002	0.050017	FALSE	21337753	0.00693857	0.0666729	4.03552e-06	0.207944	TRUE
DISORDSKINAPPENDIX	Genus Bifidobacterium	rs10797672	C	T	-0.83635	0.268113	0.913147	FALSE	181135891	0.0335521	0.126146	8.57774e-06	0.180834	TRUE
DISORDSKINAPPENDIX	Genus Bifidobacterium	rs7589469	T	C	0.853679	0.193606	0.120727	FALSE	2829810	0.0273892	0.0877665	1.83471e-07	0.155139	TRUE
DISORDSKINAPPENDIX	Genus Bifidobacterium	rs441765	G	A	-0.79939	-0.288293	0.862385	FALSE	90331022	0.0153197	0.118897	4.27265e-06	0.166564	TRUE
DISORDSKINAPPENDIX	Genus Bifidobacterium	rs113937364	A	G	0.9998	0.312741	0.049909	FALSE	21337753	0.0347648	0.148142	4.03552e-06	0.207944	TRUE
DISORDSKINAPPENDIX	Genus Bifidobacterium	rs77561070	T	C	0.938472	-0.0378152	0.173387	FALSE	159192055	0.000586395	0.0199986	1.43853e-06	0.1861	TRUE
DISORDSKINAPPENDIX	Genus Bifidobacterium	rs441765	G	A	-0.79939	0.0217838	0.862507	FALSE	90331022	0.0031574	0.0217132	4.27265e-06	0.166564	TRUE
DISORDSKINAPPENDIX	Genus Bifidobacterium	rs10797672	C	T	-0.83635	0.0188208	0.913158	FALSE	181135891	0.00477847	0.0265167	8.57774e-06	0.180834	TRUE
DISORDSKINAPPENDIX	Genus Bifidobacterium	rs4865815	A	G	0.710367	0.0155049	0.129485	FALSE	54332877	0.00485396	0.0222244	9.88957e-06	0.154738	TRUE
DISORDSKINAPPENDIX	Genus Bifidobacterium	rs7589469	T	C	0.853679	0.0118033	0.120614	FALSE	2829810	0.00608419	0.0230385	1.83471e-07	0.155139	TRUE
DISORDSKINAPPENDIX	Genus Bifidobacterium	rs2962117	C	T	0.667574	-0.00898752	0.78106	FALSE	126298467	0.00618975	0.0180725	1.86129e-06	0.133564	TRUE
DISORDSKINAPPENDIX	Genus Bifidobacterium	rs113937364	A	G	0.9998	0.0131642	0.0499147	FALSE	21337753	0.00701323	0.0343235	4.03552e-06	0.207944	TRUE
DISORDSKINAPPENDIX	Genus Bifidobacterium	rs79026482	A	G	1.23782	0.00818071	0.0758429	FALSE	20896093	0.00774797	0.0285934	1.73108e-06	0.246642	TRUE
DISORDSKINAPPENDIX	Genus Bifidobacterium	rs77561070	T	C	0.938472	-0.042522	0.174423	FALSE	159192055	0.000107409	0.0152741	1.43853e-06	0.1861	TRUE
DISORDSKINAPPENDIX	Genus Bifidobacterium	rs441765	G	A	-0.79939	-0.0250091	0.862756	FALSE	90331022	0.00263418	0.0165909	4.27265e-06	0.166564	TRUE
DISORDSKINAPPENDIX	Genus Bifidobacterium	rs7589469	T	C	0.853679	-0.0168394	0.120961	FALSE	2829810	0.00669372	0.0174552	1.83471e-07	0.155139	TRUE
DISORDSKINAPPENDIX	Genus Bifidobacterium	rs10797672	C	T	-0.83635	0.0166281	0.913097	FALSE	181135891	0.00810966	0.0199888	8.57774e-06	0.180834	TRUE
DISORDSKINAPPENDIX	Genus Bifidobacterium	rs113937364	A	G	0.9998	0.0201809	0.0498571	FALSE	21337753	0.0086808	0.025797	4.03552e-06	0.207944	TRUE
DISORDSKINAPPENDIX	Genus Bifidobacterium	rs4865815	A	G	0.710367	0.00741184	0.129605	FALSE	54332877	0.0131957	0.0168372	9.88957e-06	0.154738	TRUE
DISORDSKINAPPENDIX	Genus Butyrivibrio	rs2962117	C	T	0.667574	-0.000502244	0.781071	FALSE	126298467	0.0194156	0.0137105	1.86129e-06	0.133564	TRUE
DISORDSKINAPPENDIX	Genus Butyrivibrio	rs79026482	A	G	1.23782	0.000389605	0.0758059	FALSE	20896093	0.0197142	0.0217505	1.73108e-06	0.246642	TRUE
DISORDSKINAPPENDIX	Genus Butyrivibrio	rs2962117	C	T	0.667574	0.0605456	0.781088	FALSE	126298467	0.00140803	0.0317234	1.86129e-06	0.133564	TRUE
DISORDSKINAPPENDIX	Genus Butyrivibrio	rs10797672	C	T	-0.83635	0.0838055	0.913172	FALSE	181135891	0.00175926	0.0463137	8.57774e-06	0.180834	TRUE
DISORDSKINAPPENDIX	Genus Butyrivibrio	rs4865815	A	G	0.710367	-0.0420368	0.129523	FALSE	54332877	0.0070276	0.0390008	9.88957e-06	0.154738	TRUE
DISORDSKINAPPENDIX	Genus Butyrivibrio	rs77561070	T	C	0.938472	0.0357877	0.17492	FALSE	159192055	0.0077422	0.0352284	1.43853e-06	0.1861	TRUE
DISORDSKINAPPENDIX	Genus Butyrivibrio	rs7589469	T	C	0.853679	-0.0388715	0.121056	FALSE	2829810	0.00845562	0.0405894	1.83471e-07	0.155139	TRUE
DISORDSKINAPPENDIX	Genus Butyrivibrio	rs113937364	A	G	0.9998	-0.0502351	0.0496917	FALSE	21337753	0.0099982	0.0596794	4.03552e-06	0.207944	TRUE
DISORDSKINAPPENDIX	Genus Butyrivibrio	rs441765	G	A	-0.79939	0.0238252	0.86289	FALSE	90331022	0.0133432	0.0382843	4.27265e-06	0.166564	TRUE
DISORDSKINAPPENDIX	Genus Butyrivibrio	rs79026482	A	G	1.23782	-0.0167964	0.0758306	FALSE	20896093	0.0184701	0.0503732	1.73108e-06	0.246642	TRUE
DISORDSKINAPPENDIX	Genus Butyrivibrio	rs441765	G	A	-0.79939	-0.0940155	0.862746	FALSE	90331022	0.000413597	0.0376014	4.27265e-06	0.166564	TRUE
DISORDSKINAPPENDIX	Genus Butyrivibrio	rs77561070	T	C	0.938472	-0.0312141	0.174803	FALSE	159192055	0.0123271	0.0348052	1.43853e-06	0.1861	TRUE
DISORDSKINAPPENDIX	Genus Butyrivibrio	rs79026482	A	G	1.23782	0.0402002	0.0758637	FALSE	20896093	0.013927	0.0496159	1.73108e-06	0.246642	TRUE
DISORDSKINAPPENDIX	Genus Butyrivibrio	rs10797672	C	T	-0.83635	0.0224212	0.913119	FALSE	181135891	0.0207072	0.0453754	8.57774e-06	0.180834	TRUE
DISORDSKINAPPENDIX	Genus Butyrivibrio	rs7589469	T	C	0.853679	0.0185844	0.121133	FALSE	2829810	0.0212928	0.0395919	1.83471e-07	0.155139	TRUE
DISORDSKINAPPENDIX	Genus Clostridiuminnocuumgroup	rs2962117	C	T	0.667574	-0.0117777	0.780964	FALSE	126298467	0.0235064	0.0311314	1.86129e-06	0.133564	TRUE
DISORDSKINAPPENDIX	Genus Clostridiuminnocuumgroup	rs4865815	A	G	0.710367	-0.0117738	0.129569	FALSE	54332877	0.0252557	0.03816	9.88957e-06	0.154738	TRUE
DISORDSKINAPPENDIX	Genus Clostridiuminnocuumgroup	rs113937364	A	G	0.9998	0.00362129	0.0497429	FALSE	21337753	0.0316609	0.0575502	4.03552e-06	0.207944	TRUE
DISORDSKINAPPENDIX	Genus Clostridiuminnocuumgroup	rs207883	C	T	-0.812483	-0.105666	0.915945	FALSE	216142218	0.0328307	0.049512	5.04696e-06	0.168611	TRUE
DISORDSKINAPPENDIX	Genus Clostridiuminnocuumgroup	rs66831123	T	C	1.17441	0.0354516	0.127025	FALSE	103359187	0.0403023	0.0172881	1.66056e-06	0.230431	TRUE
DISORDSKINAPPENDIX	Genus Clostridiuminnocuumgroup	rs11686668	T	C	1.13925	0.119554	0.0629919	FALSE	201879434	0.0352647	0.056787	3.91743e-06	0.233293	TRUE
DISORDSKINAPPENDIX	Genus Clostridiuminnocuumgroup	rs66831123	T	C	1.17441	-0.160705	0.127025	FALSE	103359187	0.00056607	0.0466167	1.66056e-06	0.230431	TRUE
DISORDSKINAPPENDIX	Genus Clostridiuminnocuumgroup	rs207883	C	T	-0.812483	0.117257	0.915927	FALSE	216142218	0.0289108	0.053672	5.04696e-06	0.168611	TRUE
DISORDSKINAPPENDIX	Genus Eubacteriumcoprostanoligenesgroup	rs55821327	G	A	-0.835571	-0.0465265	0.213493	FALSE	54383748	0.0125357	0.0186353	2.62771e-06	0.16768	TRUE
DISORDSKINAPPENDIX	Genus Eubacteriumcoprostanoligenesgroup	rs1006566	C	A	-0.595119	-0.190547	0.528224	FALSE	14581265	0.00509706	0.0680323	6.4093e-06	0.125027	TRUE
DISORDSKINAPPENDIX	Genus Eubacteriumcoprostanoligenesgroup	rs207883	C	T	-0.812483	-0.281559	0.915843	FALSE	216142218	0.0133211	0.113758	5.04696e-06	0.168611	TRUE
DISORDSKINAPPENDIX	Genus Eubacteriumcoprostanoligenesgroup	rs240113	A	G	-0.609477	-0.0597806	0.52589	FALSE	100611010	0.00583983	0.021686	7.96e-06	0.129504	TRUE
DISORDSKINAPPENDIX	Genus Eubacteriumcoprostanoligenesgroup	rs17494629	G	T	0.734726	0.0479567	0.261991	FALSE	7831900	0.000752454	0.0142317	9.15632e-06	0.157282	TRUE
DISORDSKINAPPENDIX	Genus Eubacteriumcoprostanoligenesgroup	rs11686668	T	C	1.13925	0.0378051	0.0632233	FALSE	201879434	0.0137975	0.0153524	3.91743e-06	0.233293	TRUE
DISORDSKINAPPENDIX	Genus Eubacteriumcoprostanoligenesgroup	rs17494629	G	T	0.734726	0.0172886	0.26211	FALSE	7831900	0.0414124	0.00847741	9.15632e-06	0.157282	TRUE
DISORDSKINAPPENDIX	Genus Eubacteriumcoprostanoligenesgroup	rs17494629	G	T	0.734726	-0.176392	0.261539	FALSE	7831900	0.0272659	0.0798989	9.15632e-06	0.157282	TRUE
DISORDSKINAPPENDIX	Genus Eubacteriumcoprostanoligenesgroup	rs13102513	A	C	0.74382	0.317441	0.268756	FALSE	156569619	0.000198477	0.0853119	3.50765e-06	0.15157	TRUE
DISORDSKINAPPENDIX	Genus Eubacteriumcoprostanoligenesgroup	rs55821327	G	A	-0.835571	-0.199278	0.21366	FALSE	54383748	0.0484942	0.101002	2.62771e-06	0.16768	TRUE
DISORDSKINAPPENDIX	Genus Eubacteriumcoprostanoligenesgroup	rs11686668	T	C	1.13925	-0.150084	0.0632934	FALSE	201879434	0.0030662	0.0506866	3.91743e-06	0.233293	TRUE
DISORDSKINAPPENDIX	Genus Eubacteriumcoprostanoligenesgroup	rs66831123	T	C	1.17441	-0.0865598	0.126934	FALSE	103359187	0.016332	0.0360454	1.66056e-06	0.230431	TRUE
DISORDSKINAPPENDIX	Genus Haemophilus	rs13102513	A	C	0.74382	-0.0545719	0.268674	FALSE	156569619	0.0424199	0.026891	3.50765e-06	0.15157	TRUE
DISORDSKINAPPENDIX	Genus Haemophilus	rs11686668	T	C	1.13925	-0.0704761	0.0632233	FALSE	201879434	0.00771205	0.0264508	3.91743e-06	0.233293	TRUE
DISORDSKINAPPENDIX	Genus Haemophilus	rs66831123	T	C	1.17441	0.0389072	0.127096	FALSE	103359187	0.00087791	0.0227904	1.66056e-06	0.230431	TRUE
DISORDSKINAPPENDIX	Genus Haemophilus	rs11686668	T	C	1.13925	-0.0511346	0.0632808	FALSE	201879434	0.000980528	0.0309088	3.91743e-06	0.233293	TRUE
DISORDSKINAPPENDIX	Genus Haemophilus	rs11836059	G	A	-0.632348	-0.0259519	0.297838	FALSE	525236	0.00113053	0.0163774	5.87492e-06	0.132181	TRUE
DISORDSKINAPPENDIX	Genus Haemophilus	rs240113	A	G	-0.609477	-0.0212594	0.525675	FALSE	100611010	0.00154795	0.014942	7.96e-06	0.129504	TRUE
DISORDSKINAPPENDIX	Genus Haemophilus	rs13102513	A	C	0.74382	0.0189238	0.268869	FALSE	156569619	0.00262573	0.0168913	3.50765e-06	0.15157	TRUE
DISORDSKINAPPENDIX	Genus Haemophilus	rs17494629	G	T	0.734726	-0.0183888	0.262115	FALSE	7831900	0.002792	0.0169933	9.15632e-06	0.157282	TRUE
DISORDSKINAPPENDIX	Genus Haemophilus	rs55821327	G	A	-0.835571	0.0183275	0.213482	FALSE	54383748	0.0031677	0.0183071	2.62771e-06	0.16768	TRUE
ACNE	Phylum Actinobacteria	rs207883	C	T	-0.812483	0.017492	0.915914	FALSE	216142218	0.00515857	0.0269214	5.04696e-06	0.168611	TRUE
ACNE	Phylum Actinobacteria	rs113611024	G	A	0.859199	-0.00891872	0.130598	FALSE	8985095	0.00687659	0.0221839	5.437e-07	0.160292	TRUE
ACNE	Phylum Actinobacteria	rs62168465	T	C	1.0638	-0.00875146	0.105658	FALSE	137653986	0.00719983	0.0244125	9.02165e-06	0.227547	TRUE
ACNE	Phylum Actinobacteria	rs1006566	C	A	-0.595119	-0.00206003	0.528378	FALSE	14581265	0.00890669	0.0149867	6.4093e-06	0.125027	TRUE
ACNE	Phylum Actinobacteria	rs113611024	G	A	0.859199	-0.027313	0.130108	FALSE	8985095	0.00210024	0.0168492	5.437e-07	0.160292	TRUE
ACNE	Phylum Actinobacteria	rs17494629	G	T	0.734726	0.0141939	0.262426	FALSE	7831900	0.00536094	0.0128153	9.15632e-06	0.157282	TRUE
ACNE	Phylum Actinobacteria	rs1006566	C	A	-0.595119	0.0109979	0.52817	FALSE	14581265	0.00665352	0.0113528	6.4093e-06	0.125027	TRUE
ACNE	Phylum Actinobacteria	rs11836059	G	A	-0.632348	-0.0108225	0.298888	FALSE	525236	0.00767122	0.0124203	5.87492e-06	0.132181	TRUE
ACNE	Phylum Actinobacteria	rs11686668	T	C	1.13925	0.0177649	0.0633168	FALSE	201879434	0.00896728	0.0234321	3.91743e-06	0.233293	TRUE
ACNE	Phylum Actinobacteria	rs207883	C	T	-0.812483	0.0135895	0.916448	FALSE	216142218	0.0100958	0.020375	5.04696e-06	0.168611	TRUE
ACNE	Phylum Actinobacteria	rs66831123	T	C	1.17441	0.00841569	0.127783	FALSE	103359187	0.0125201	0.0172679	1.66056e-06	0.230431	TRUE
ACNE	Phylum Actinobacteria	rs55821327	G	A	-0.835571	-0.00551658	0.213437	FALSE	54383748	0.0138293	0.0139002	2.62771e-06	0.16768	TRUE
ACNE	Phylum Actinobacteria	rs240113	A	G	-0.609477	0.00179579	0.526422	FALSE	100611010	0.0174811	0.011329	7.96e-06	0.129504	TRUE
ACNE	Phylum Actinobacteria	rs13102513	A	C	0.74382	-0.00182451	0.268515	FALSE	156569619	0.0177329	0.0127988	3.50765e-06	0.15157	TRUE
ACNE	Phylum Actinobacteria	rs62168465	T	C	1.0638	-0.00259394	0.106036	FALSE	137653986	0.0177656	0.018465	9.02165e-06	0.227547	TRUE
ACNE	Phylum Actinobacteria	rs55821327	G	A	-0.835571	-0.0338993	0.2135	FALSE	54383748	0.00728058	0.0321186	2.62771e-06	0.16768	TRUE
ACNE	Phylum Actinobacteria	rs113611024	G	A	0.859199	-0.0318061	0.130223	FALSE	8985095	0.0103141	0.0388168	5.437e-07	0.160292	TRUE
ACNE	Phylum Actinobacteria	rs11836059	G	A	-0.632348	-0.0227229	0.299125	FALSE	525236	0.0107472	0.0287857	5.87492e-06	0.132181	TRUE
ACNE	Class Actinobacteria	rs66831123	T	C	1.17441	-0.0273643	0.127757	FALSE	103359187	0.0124173	0.0402589	1.66056e-06	0.230431	TRUE
ACNE	Class Actinobacteria	rs62168465	T	C	1.0638	-0.0244876	0.105999	FALSE	137653986	0.0141312	0.0425824	9.02165e-06	0.227547	TRUE
ACNE	Class Actinobacteria	rs17494629	G	T	0.734726	0.0170592	0.262278	FALSE	7831900	0.0141499	0.0297222	9.15632e-06	0.157282	TRUE
ACNE	Class Actinobacteria	rs11686668	T	C	1.13925	0.0289815	0.0632742	FALSE	201879434	0.0148869	0.0545879	3.91743e-06	0.233293	TRUE
ACNE	Class Actinobacteria	rs1006566	C	A	-0.595119	0.0122489	0.52799	FALSE	14581265	0.0160171	0.0262435	6.4093e-06	0.125027	TRUE
ACNE	Class Actinobacteria	rs207883	C	T	-0.812483	-0.0126503	0.916439	FALSE	216142218	0.0196755	0.0468212	5.04696e-06	0.168611	TRUE
ACNE	Class Actinobacteria	rs240113	A	G	-0.609477	0.00128971	0.526403	FALSE	100611010	0.0240185	0.0262018	7.96e-06	0.129504	TRUE
ACNE	Class Actinobacteria	rs13102513	A	C	0.74382	6.82446e-05	0.268468	FALSE	156569619	0.0249539	0.0295477	3.50765e-06	0.15157	TRUE
ACNE	Class Actinobacteria	rs1006566	C	A	-0.595119	0.037424	0.528055	FALSE	14581265	0.0049029	0.0258115	6.4093e-06	0.125027	TRUE
ACNE	Class Actinobacteria	rs55821327	G	A	-0.835571	-0.039955	0.213488	FALSE	54383748	0.0068536	0.0315667	2.62771e-06	0.16768	TRUE
ACNE	Class Actinobacteria	rs11836059	G	A	-0.632348	0.0307122	0.29924	FALSE	525236	0.0092213	0.0282307	5.87492e-06	0.132181	TRUE
ACNE	Class Actinobacteria	rs240113	A	G	-0.609477	-0.0259259	0.52632	FALSE	100611010	0.0104498	0.0257222	7.96e-06	0.129504	TRUE
ACNE	Class Actinobacteria	rs66831123	T	C	1.17441	-0.036961	0.127736	FALSE	103359187	0.0116702	0.0395565	1.66056e-06	0.230431	TRUE
ACNE	Class Actinobacteria	rs113611024	G	A	0.859199	0.0355049	0.130307	FALSE	8985095	0.0116913	0.0380481	5.437e-07	0.160292	TRUE
ACNE	Class Actinobacteria	rs17494629	G	T	0.734726	0.0262653	0.262296	FALSE	7831900	0.0122484	0.029143	9.15632e-06	0.157282	TRUE
ACNE	Class Actinobacteria	rs11686668	T	C	1.13925	0.0281087	0.0632768	FALSE	201879434	0.019991	0.0535619	3.91743e-06	0.233293	TRUE
ACNE	Class Actinobacteria	rs207883	C	T	-0.812483	-0.0136852	0.916439	FALSE	216142218	0.0255444	0.046051	5.04696e-06	0.168611	TRUE
ACNE	Class Actinobacteria	rs62168465	T	C	1.0638	0.0113684	0.106023	FALSE	137653986	0.0262351	0.0420834	9.02165e-06	0.227547	TRUE
ACNE	Class Actinobacteria	rs13102513	A	C	0.74382	-0.00123867	0.268475	FALSE	156569619	0.0321997	0.029052	3.50765e-06	0.15157	TRUE
ACNE	Class Actinobacteria	rs190339	T	C	0.430415	0.0406703	0.73595	FALSE	81135796	0.00624017	0.0308367	4.2e-06	0.0915257	TRUE
ACNE	Order Lactobacillales	rs7242360	T	C	-0.482741	0.0410573	0.238079	FALSE	63019630	0.00662767	0.0319539	4.2e-06	0.102649	TRUE
ACNE	Order Lactobacillales	rs9787193	T	G	-0.396489	0.0275832	0.458652	FALSE	175723168	0.0104516	0.0273695	8.57e-06	0.0872857	TRUE
ACNE	Order Lactobacillales	rs12341016	A	G	0.612962	-0.0362618	0.149688	FALSE	71396729	0.0113979	0.0381566	5.57e-06	0.132107	TRUE
ACNE	Order Lactobacillales	rs6440920	G	A	-0.448873	-0.0218499	0.641622	FALSE	153986567	0.0147783	0.0285041	3.79e-06	0.0949885	TRUE
ACNE	Order Lactobacillales	rs76587105	C	T	-0.708879	0.0306698	0.0765732	FALSE	77541812	0.0184715	0.0518456	7.08e-06	0.154579	TRUE
ACNE	Order Lactobacillales	rs2179810	G	A	0.398256	0.0147282	0.324931	FALSE	1500953	0.0204711	0.029212	8.1e-06	0.0874287	TRUE
ACNE	Order Lactobacillales	rs11016288	A	G	-0.773905	-0.022499	0.0887861	FALSE	128510292	0.0212463	0.0477331	3.47e-06	0.163108	TRUE
ACNE	Order Lactobacillales	rs76134490	A	G	0.728196	-0.0218949	0.0831556	FALSE	83963211	0.0219498	0.0495369	6.95e-06	0.15865	TRUE
ACNE	Order Lactobacillales	rs10941190	G	A	0.414646	-0.00493807	0.352852	FALSE	34490009	0.0287435	0.028471	7.34e-06	0.0905819	TRUE
ACNE	Order Lactobacillales	rs9787193	T	G	-0.396489	0.223887	0.458564	FALSE	175723168	0.00112943	0.102045	8.57249e-06	0.0872857	TRUE
ACNE	Order Lactobacillales	rs7242360	T	C	-0.482741	0.261679	0.236657	FALSE	63019630	0.00115838	0.119815	4.19859e-06	0.102649	TRUE
ACNE	Order Lactobacillales	rs10941190	G	A	0.414646	-0.172898	0.353079	FALSE	34490009	0.00410744	0.105944	7.34293e-06	0.0905819	TRUE
ACNE	Order Lactobacillales	rs190339	T	C	0.430415	-0.169634	0.734731	FALSE	81135796	0.00558392	0.114828	4.20193e-06	0.0915257	TRUE
ACNE	Order Lactobacillales	rs76587105	C	T	-0.708879	-0.101784	0.076033	FALSE	77541812	0.0240296	0.194492	7.07895e-06	0.154579	TRUE
ACNE	Order Lactobacillales	rs2179810	G	A	0.398256	-0.0438482	0.323473	FALSE	1500953	0.0275033	0.109038	8.10423e-06	0.0874287	TRUE
ACNE	Family Bacteroidaceae	rs12341016	A	G	0.612962	0.0404836	0.149748	FALSE	71396729	0.0310204	0.141959	5.56828e-06	0.132107	TRUE
ACNE	Family Bacteroidaceae	rs6440920	G	A	-0.448873	-0.0191065	0.642687	FALSE	153986567	0.03428	0.106032	3.78934e-06	0.0949885	TRUE
ACNE	Family Bacteroidaceae	rs76134490	A	G	0.728196	0.0308276	0.0828586	FALSE	83963211	0.0347245	0.185645	6.95213e-06	0.15865	TRUE
ACNE	Family Bacteroidaceae	rs11016288	A	G	-0.773905	-0.0221778	0.0893536	FALSE	128510292	0.0359782	0.175528	3.47359e-06	0.163108	TRUE
ACNE	Family Bacteroidaceae	rs112162072	G	A	-0.740482	-0.0992467	0.0834973	FALSE	20601415	0.00149802	0.0494944	6.17e-06	0.16096	TRUE
ACNE	Family Bacteroidaceae	rs62275583	T	C	0.683464	0.0721123	0.125681	FALSE	153201322	0.00259035	0.0408769	5.13e-06	0.147221	TRUE
ACNE	Family Bacteroidaceae	rs61975175	G	A	-0.653722	-0.0824959	0.069081	FALSE	105829077	0.00418083	0.0538346	5.12e-06	0.140864	TRUE
ACNE	Family Bacteroidaceae	rs62138459	C	T	0.497753	0.0506859	0.202677	FALSE	47357596	0.0044889	0.033882	1.36e-06	0.101008	TRUE
ACNE	Family Bifidobacteriaceae	rs1283671	T	C	-0.552612	0.0332672	0.104514	FALSE	107421459	0.0150985	0.0443268	3.22e-06	0.116536	TRUE
ACNE	Family Bifidobacteriaceae	rs74538992	G	A	-0.682807	-0.0427167	0.0460328	FALSE	126027010	0.0169623	0.0646636	6.88e-06	0.149262	TRUE
ACNE	Family Bifidobacteriaceae	rs74962111	A	G	0.665159	0.0493086	0.0299217	FALSE	73601526	0.0180567	0.0808017	3.05e-06	0.139926	TRUE
ACNE	Family Bifidobacteriaceae	rs142690890	T	C	-0.765806	-0.0297172	0.0723072	FALSE	23310276	0.0191234	0.0528205	3.41e-06	0.161926	TRUE
ACNE	Family Bifidobacteriaceae	rs73167292	T	C	-0.786664	-0.0227462	0.0940997	FALSE	172371155	0.0208809	0.0467296	1.76e-07	0.147228	TRUE
ACNE	Family Bifidobacteriaceae	rs2013210	G	A	0.37162	0.00471148	0.301895	FALSE	59479263	0.0291132	0.0295678	9.17e-06	0.0823968	TRUE
ACNE	Family Bifidobacteriaceae	rs4959153	A	G	-0.427495	-0.00387789	0.807715	FALSE	1723371	0.0303611	0.0346276	2.69e-06	0.0894124	TRUE
ACNE	Family Bifidobacteriaceae	rs55902701	A	G	-0.750338	0.00384195	0.0908722	FALSE	11575128	0.0311867	0.0475492	4.7e-06	0.161013	TRUE
ACNE	Family Bifidobacteriaceae	rs74962111	A	G	0.665159	0.674854	0.0298266	FALSE	73601526	0.00101592	0.301908	3.04726e-06	0.139926	TRUE
ACNE	Family Bifidobacteriaceae	rs74538992	G	A	-0.682807	-0.47421	0.0461229	FALSE	126027010	0.00195232	0.240683	6.87874e-06	0.149262	TRUE
ACNE	Family Bifidobacteriaceae	rs55902701	A	G	-0.750338	-0.320711	0.0908732	FALSE	11575128	0.00294693	0.179305	4.69933e-06	0.161013	TRUE
ACNE	Family Bifidobacteriaceae	rs73167292	T	C	-0.786664	0.166223	0.0941047	FALSE	172371155	0.0136642	0.174788	1.76192e-07	0.147228	TRUE
ACNE	Family Bifidobacteriaceae	rs142690890	T	C	-0.765806	0.182632	0.072414	FALSE	23310276	0.0142174	0.197633	3.41247e-06	0.161926	TRUE
ACNE	Family Bifidobacteriaceae	rs112162072	G	A	-0.740482	0.14338	0.0833578	FALSE	20601415	0.017632	0.186004	6.16808e-06	0.16096	TRUE
ACNE	Family Bifidobacteriaceae	rs61975175	G	A	-0.653722	0.123349	0.0693516	FALSE	105829077	0.0214888	0.199911	5.11659e-06	0.140864	TRUE
ACNE	Family Bifidobacteriaceae	rs62138459	C	T	0.497753	-0.0515302	0.203337	FALSE	47357596	0.027355	0.126553	1.35796e-06	0.101008	TRUE
ACNE	Family Bifidobacteriaceae	rs1283671	T	C	-0.552612	0.0553123	0.104759	FALSE	107421459	0.0294662	0.164479	3.21998e-06	0.116536	TRUE
ACNE	Family Bifidobacteriaceae	rs4959153	A	G	-0.427495	0.0418547	0.808236	FALSE	1723371	0.029881	0.129756	2.6903e-06	0.0894124	TRUE
ACNE	Family Bifidobacteriaceae	rs62275583	T	C	0.683464	-0.020469	0.125682	FALSE	153201322	0.0357362	0.152758	5.12913e-06	0.147221	TRUE
ACNE	Family Bifidobacteriaceae	rs2013210	G	A	0.37162	-0.00645154	0.302012	FALSE	59479263	0.0381374	0.110483	9.17334e-06	0.0823968	TRUE
ACNE	Family Clostridiaceae1	rs2560691	A	G	0.491309	-0.0454649	0.240658	FALSE	116018886	0.00511047	0.0318399	1.05e-06	0.0981145	TRUE
ACNE	Family Clostridiaceae1	rs5760786	C	T	-0.407374	0.0270969	0.536257	FALSE	24999375	0.0106813	0.0272726	6.02e-06	0.0880603	TRUE
ACNE	Family Clostridiaceae1	rs62407694	T	C	-0.391901	0.0173052	0.503066	FALSE	71752937	0.0174988	0.0272216	9.16e-06	0.0864974	TRUE
ACNE	Family Clostridiaceae1	rs28578546	C	G	0.591821	-0.0142741	0.151991	FALSE	231514788	0.0235223	0.0377942	2.01e-06	0.121568	TRUE
ACNE	Family Clostridiaceae1	rs28578546	C	G	0.591821	0.137858	0.152001	FALSE	231514788	0.0130244	0.140243	2.01034e-06	0.121568	TRUE
ACNE	Family Clostridiaceae1	rs5760786	C	T	-0.407374	0.0933393	0.536483	FALSE	24999375	0.0143874	0.101903	6.01752e-06	0.0880603	TRUE
ACNE	Family Clostridiaceae1	rs62407694	T	C	-0.391901	0.0485634	0.502458	FALSE	71752937	0.0253515	0.101938	9.1561e-06	0.0864974	TRUE
ACNE	Family Clostridiaceae1	rs2560691	A	G	0.491309	0.00988458	0.240139	FALSE	116018886	0.0373574	0.119244	1.04986e-06	0.0981145	TRUE
ACNE	Family Clostridiaceae1	rs6011229	G	A	0.596436	0.0346886	0.259985	FALSE	63926881	0.00737038	0.0129453	5.30271e-06	0.12687	TRUE
ACNE	Family Clostridiaceae1	rs6011229	G	A	0.596436	-0.0468497	0.259985	FALSE	63926881	0.00596774	0.0170391	5.30271e-06	0.12687	TRUE
ACNE	Family Lactobacillaceae	rs6011229	G	A	0.596436	0.0513321	0.259833	FALSE	63926881	0.0199517	0.022057	5.30271e-06	0.12687	TRUE
ACNE	Family Lactobacillaceae	rs6011229	G	A	0.596436	0.059552	0.259732	FALSE	63926881	2.84557e-05	0.0142282	5.30271e-06	0.12687	TRUE
ACNE	Family Lactobacillaceae	rs6011229	G	A	0.596436	0.0301767	0.259985	FALSE	63926881	0.000370834	0.00847657	5.30271e-06	0.12687	TRUE
ACNE	Family Lactobacillaceae	rs35960238	G	A	0.903207	-0.309741	0.129374	FALSE	26331627	0.00491609	0.110131	8.91353e-06	0.197195	TRUE
ACNE	Family Lactobacillaceae	rs12520028	C	T	0.587034	-0.192087	0.15948	FALSE	114324212	0.0442446	0.0954816	5.90195e-07	0.113103	TRUE
ACNE	Family Lactobacillaceae	rs6011229	G	A	0.596436	0.158989	0.25972	FALSE	63926881	0.0338018	0.074909	5.30271e-06	0.12687	TRUE
ACNE	Family Lactobacillaceae	rs2863060	A	G	0.513905	-0.132853	0.264322	FALSE	177796926	0.0414372	0.0651517	7.29069e-06	0.111059	TRUE
ACNE	Family Lactobacillaceae	rs6011229	G	A	0.596436	0.211497	0.259233	FALSE	63926881	0.0242695	0.0938802	5.30271e-06	0.12687	TRUE
ACNE	Family Lactobacillaceae	rs10417540	T	C	0.638282	-0.0721548	0.149591	FALSE	34521462	0.0313379	0.0335174	1.16083e-06	0.126568	TRUE
ACNE	Family Porphyromonadaceae	rs11243060	T	G	0.508523	0.0638858	0.610189	FALSE	6123047	0.0316483	0.0297306	3.95549e-06	0.106644	TRUE
ACNE	Family Porphyromonadaceae	rs12995580	T	C	0.484116	0.0267896	0.341309	FALSE	45744908	0.0447003	0.013345	7.509e-06	0.104778	TRUE
ACNE	Family Porphyromonadaceae	rs10417540	T	C	0.638282	-0.205582	0.149651	FALSE	34521462	0.0224802	0.0900822	1.16083e-06	0.126568	TRUE
ACNE	Family Porphyromonadaceae	rs10417540	T	C	0.638282	-0.40167	0.149659	FALSE	34521462	0.00922741	0.15428	1.16083e-06	0.126568	TRUE
ACNE	Family Porphyromonadaceae	rs12520028	C	T	0.587034	0.301257	0.159597	FALSE	114324212	0.0358963	0.143585	5.90195e-07	0.113103	TRUE
ACNE	Family Porphyromonadaceae	rs11243060	T	G	0.508523	0.0346865	0.610164	FALSE	6123047	0.0239282	0.0153597	3.95549e-06	0.106644	TRUE
ACNE	Family Porphyromonadaceae	rs12995580	T	C	0.484116	0.0295442	0.341277	FALSE	45744908	0.000621241	0.0158379	7.509e-06	0.104778	TRUE
ACNE	Family Porphyromonadaceae	rs2863060	A	G	0.513905	0.0201045	0.264482	FALSE	177796926	0.00235851	0.0169598	7.29069e-06	0.111059	TRUE
ACNE	Family Porphyromonadaceae	rs6011229	G	A	0.596436	-0.0198028	0.260072	FALSE	63926881	0.00245637	0.0170565	5.30271e-06	0.12687	TRUE
ACNE	Family Porphyromonadaceae	rs117903743	T	C	0.926794	0.0193658	0.102885	FALSE	24639680	0.00437919	0.0249651	5.29043e-06	0.19712	TRUE
ACNE	Genus Allisonella	rs12520028	C	T	0.587034	-0.000874492	0.159558	FALSE	114324212	0.00966001	0.0205161	5.90195e-07	0.113103	TRUE
ACNE	Genus Allisonella	rs35960238	G	A	0.903207	-0.000648462	0.129455	FALSE	26331627	0.00976834	0.0223314	8.91353e-06	0.197195	TRUE
ACNE	Genus Allisonella	rs10417540	T	C	0.638282	-0.00060326	0.149705	FALSE	34521462	0.00976989	0.0209146	1.16083e-06	0.126568	TRUE
ACNE	Genus Allisonella	rs2863060	A	G	0.513905	0.0294773	0.264719	FALSE	177796926	0.000438844	0.0128645	7.29069e-06	0.111059	TRUE
ACNE	Genus Allisonella	rs12520028	C	T	0.587034	-0.0177832	0.159951	FALSE	114324212	0.00505448	0.0155481	5.90195e-07	0.113103	TRUE
ACNE	Genus Allisonella	rs11243060	T	G	0.508523	-0.0123231	0.610248	FALSE	6123047	0.00580208	0.0116487	3.95549e-06	0.106644	TRUE
ACNE	Genus Allisonella	rs35960238	G	A	0.903207	0.015413	0.129597	FALSE	26331627	0.00726028	0.0169441	8.91353e-06	0.197195	TRUE
ACNE	Genus Allisonella	rs117903743	T	C	0.926794	-0.014075	0.102976	FALSE	24639680	0.00915598	0.0189568	5.29043e-06	0.19712	TRUE
ACNE	Genus Bacteroides	rs6011229	G	A	0.596436	-0.00906006	0.261075	FALSE	63926881	0.00967402	0.0129363	5.30271e-06	0.12687	TRUE
ACNE	Genus Bacteroides	rs10417540	T	C	0.638282	0.00553869	0.14934	FALSE	34521462	0.0145588	0.0159219	1.16083e-06	0.126568	TRUE
ACNE	Genus Bacteroides	rs12995580	T	C	0.484116	0.00102115	0.341263	FALSE	45744908	0.0186477	0.0120357	7.509e-06	0.104778	TRUE
ACNE	Genus Bacteroides	rs117903743	T	C	0.926794	0.0753797	0.103173	FALSE	24639680	0.00216995	0.0440164	5.29043e-06	0.19712	TRUE
ACNE	Genus Bacteroides	rs10417540	T	C	0.638282	-0.0589487	0.149142	FALSE	34521462	0.0026982	0.0366694	1.16083e-06	0.126568	TRUE
ACNE	Genus Bacteroides	rs6011229	G	A	0.596436	-0.0479561	0.261067	FALSE	63926881	0.0027299	0.0299385	5.30271e-06	0.12687	TRUE
ACNE	Genus Bacteroides	rs11243060	T	G	0.508523	0.0244177	0.610487	FALSE	6123047	0.0091283	0.0269622	3.95549e-06	0.106644	TRUE
ACNE	Genus Bacteroides	rs35960238	G	A	0.903207	0.0121542	0.129535	FALSE	26331627	0.0189173	0.0392289	8.91353e-06	0.197195	TRUE
ACNE	Genus Bifidobacterium	rs12995580	T	C	0.484116	0.00553266	0.341413	FALSE	45744908	0.0210539	0.0277836	7.509e-06	0.104778	TRUE
ACNE	Genus Bifidobacterium	rs2863060	A	G	0.513905	-0.00305951	0.264369	FALSE	177796926	0.0229594	0.0298549	7.29069e-06	0.111059	TRUE
ACNE	Genus Bifidobacterium	rs12520028	C	T	0.587034	-0.000496673	0.160147	FALSE	114324212	0.0247241	0.0359058	5.90195e-07	0.113103	TRUE
ACNE	Genus Bifidobacterium	rs10417540	T	C	0.638282	0.0571139	0.149317	FALSE	34521462	0.0037411	0.0359606	1.16083e-06	0.126568	TRUE
ACNE	Genus Bifidobacterium	rs12520028	C	T	0.587034	-0.052874	0.160082	FALSE	114324212	0.00442667	0.0351754	5.90195e-07	0.113103	TRUE
ACNE	Genus Bifidobacterium	rs11243060	T	G	0.508523	-0.0338116	0.610316	FALSE	6123047	0.00673933	0.0265113	3.95549e-06	0.106644	TRUE
ACNE	Genus Bifidobacterium	rs117903743	T	C	0.926794	-0.0522686	0.103053	FALSE	24639680	0.0075778	0.0432954	5.29043e-06	0.19712	TRUE
ACNE	Genus Bifidobacterium	rs12995580	T	C	0.484116	-0.0209755	0.34133	FALSE	45744908	0.0147827	0.0273714	7.509e-06	0.104778	TRUE
ACNE	Genus Bifidobacterium	rs6011229	G	A	0.596436	-0.0168683	0.261143	FALSE	63926881	0.0188686	0.029394	5.30271e-06	0.12687	TRUE
ACNE	Genus Bifidobacterium	rs35960238	G	A	0.903207	-0.018362	0.129502	FALSE	26331627	0.0211051	0.038471	8.91353e-06	0.197195	TRUE
ACNE	Genus Bifidobacterium	rs2863060	A	G	0.513905	-0.0088047	0.264352	FALSE	177796926	0.0254668	0.0293269	7.29069e-06	0.111059	TRUE
ACNE	Genus Bifidobacterium	rs8005917	C	T	-0.714998	0.0677025	0.756939	FALSE	98586716	0.00113448	0.0319402	1.29e-07	0.127662	TRUE
ACNE	Genus Bifidobacterium	rs9566503	A	G	0.481656	-0.0446012	0.363607	FALSE	40276961	0.00388037	0.0284081	9.31e-06	0.1042	TRUE
ACNE	Genus Bifidobacterium	rs35062736	C	T	-0.654027	0.0274447	0.253075	FALSE	16151258	0.0127033	0.0313342	1.48e-06	0.129356	TRUE
ACNE	Genus Bifidobacterium	rs62445097	T	C	0.955902	0.0277021	0.107845	FALSE	16942959	0.0177435	0.0443595	3.39e-06	0.196539	TRUE
ACNE	Genus Bifidobacterium	rs73234134	C	A	0.810957	0.0311364	0.0541955	FALSE	18813816	0.0202501	0.0606191	7.45e-06	0.173411	TRUE
ACNE	Genus Bifidobacterium	rs13127174	T	C	1.11245	-0.0168147	0.10668	FALSE	16526848	0.0234016	0.0439536	1.94e-06	0.222719	TRUE
ACNE	Genus Bifidobacterium	rs4877258	C	T	0.650613	-0.0103598	0.715827	FALSE	83570540	0.0244166	0.0303093	1.05e-06	0.126684	TRUE
ACNE	Genus Bifidobacterium	rs60626065	G	A	1.07316	-0.0133092	0.0508023	FALSE	120544373	0.0276892	0.0622402	7.7e-06	0.229875	TRUE
ACNE	Genus Fusicatenibacter	rs60626065	G	A	1.07316	0.541917	0.0509043	FALSE	120544373	0.000141932	0.185858	7.70132e-06	0.229875	TRUE
ACNE	Genus Fusicatenibacter	rs73234134	C	A	0.810957	0.374016	0.0533004	FALSE	18813816	0.0041556	0.229982	7.44789e-06	0.173411	TRUE
ACNE	Genus Fusicatenibacter	rs8005917	C	T	-0.714998	-0.152877	0.756338	FALSE	98586716	0.00799288	0.119243	1.2922e-07	0.127662	TRUE
ACNE	Genus Fusicatenibacter	rs35062736	C	T	-0.654027	0.144958	0.25284	FALSE	16151258	0.00874936	0.117862	1.48487e-06	0.129356	TRUE
ACNE	Genus Fusicatenibacter	rs13127174	T	C	1.11245	0.151147	0.107109	FALSE	16526848	0.0143847	0.164991	1.93538e-06	0.222719	TRUE
ACNE	Genus Fusicatenibacter	rs9566503	A	G	0.481656	0.0804828	0.363374	FALSE	40276961	0.0179633	0.106326	9.3122e-06	0.1042	TRUE
ACNE	Genus Fusicatenibacter	rs4877258	C	T	0.650613	-0.0579179	0.71516	FALSE	83570540	0.0244169	0.113682	1.04824e-06	0.126684	TRUE
ACNE	Genus Fusicatenibacter	rs62445097	T	C	0.955902	0.0336305	0.107485	FALSE	16942959	0.0335954	0.166456	3.39482e-06	0.196539	TRUE
ACNE	Genus Fusicatenibacter	rs561406	A	G	0.560137	0.16564	0.287683	FALSE	29243181	0.0043144	0.0580336	8.84469e-06	0.12127	TRUE
ACNE	Genus Fusicatenibacter	rs10842522	A	G	-0.673318	-0.168661	0.845148	FALSE	25286359	0.0255605	0.0755374	9.69395e-06	0.146473	TRUE
ACNE	Genus Fusicatenibacter	rs1122486	A	T	-0.515658	0.0618161	0.391694	FALSE	97841388	0.0277121	0.0280811	6.05124e-06	0.109323	TRUE
ACNE	Genus Fusicatenibacter	rs10842522	A	G	-0.673318	-0.289724	0.845613	FALSE	25286359	0.0395121	0.140724	9.69395e-06	0.146473	TRUE
ACNE	Genus Fusicatenibacter	rs8079916	G	A	0.786437	-0.0954557	0.162721	FALSE	68514301	0.034582	0.0451708	6.70028e-06	0.167851	TRUE
ACNE	Genus Fusicatenibacter	rs1122486	A	T	-0.515658	0.0575215	0.391877	FALSE	97841388	0.0410894	0.0281605	6.05124e-06	0.109323	TRUE
ACNE	Genus Fusicatenibacter	rs1105912	C	T	0.570208	-0.284411	0.600914	FALSE	26066396	0.0223224	0.124478	5.27245e-06	0.11985	TRUE
ACNE	Genus Fusicatenibacter	rs13381295	A	G	1.08317	-0.596239	0.047824	FALSE	40969641	0.0403404	0.290814	9.42956e-06	0.235292	TRUE
ACNE	Genus Fusicatenibacter	rs1536171	A	G	-0.549112	-0.0779085	0.435029	FALSE	65313299	0.0107169	0.0305308	5.54156e-06	0.116082	TRUE
ACNE	Genus Fusicatenibacter	rs13381295	A	G	1.08317	0.164063	0.047875	FALSE	40969641	0.0110706	0.06458	9.42956e-06	0.235292	TRUE
ACNE	Genus Fusicatenibacter	rs7241053	A	G	-0.588621	-0.0638691	0.547309	FALSE	6638010	0.0231425	0.0281229	6.17983e-07	0.112492	TRUE
ACNE	Genus Lactobacillus	rs561406	A	G	0.560137	-0.0597558	0.287553	FALSE	29243181	0.0498161	0.0304637	8.84469e-06	0.12127	TRUE
ACNE	Genus Lactobacillus	rs7028136	C	G	-0.601272	0.0699894	0.287091	FALSE	29658443	0.0331139	0.0328481	2.30821e-06	0.121846	TRUE
ACNE	Genus Lactobacillus	rs1122486	A	T	-0.515658	-0.198978	0.391749	FALSE	97841388	0.0485613	0.10088	6.05124e-06	0.109323	TRUE
ACNE	Genus Lactobacillus	rs561406	A	G	0.560137	-0.0523019	0.287613	FALSE	29243181	0.00207267	0.0169833	8.84469e-06	0.12127	TRUE
ACNE	Genus Lactobacillus	rs12309087	C	T	1.10822	-0.0883216	0.0560067	FALSE	94759582	0.00954004	0.0340738	8.20808e-06	0.238861	TRUE
ACNE	Genus Lactobacillus	rs8079916	G	A	0.786437	-0.0408007	0.162776	FALSE	68514301	0.048376	0.0206686	6.70028e-06	0.167851	TRUE
ACNE	Genus Lactobacillus	rs561406	A	G	0.560137	-0.17839	0.287854	FALSE	29243181	0.0211743	0.0773974	8.84469e-06	0.12127	TRUE
ACNE	Genus Lactobacillus	rs561406	A	G	0.560137	-0.0521723	0.287696	FALSE	29243181	0.0126471	0.0209229	8.84469e-06	0.12127	TRUE
ACNE	Genus Victivallis	rs561406	A	G	0.560137	0.0518114	0.287808	FALSE	29243181	0.0310678	0.0240291	8.84469e-06	0.12127	TRUE
ACNE	Genus Victivallis	rs10842522	A	G	-0.673318	-0.064347	0.844825	FALSE	25286359	0.0312651	0.0298777	9.69395e-06	0.146473	TRUE
ACNE	Genus Victivallis	rs8079916	G	A	0.786437	-0.186808	0.162884	FALSE	68514301	0.0348177	0.088515	6.70028e-06	0.167851	TRUE
ACNE	Genus Victivallis	rs115699544	G	A	1.29633	0.454207	0.0171541	FALSE	66862168	0.0437542	0.225252	9.87025e-06	0.282021	TRUE
ACNE	Genus Victivallis	rs115699544	G	A	1.29633	0.222326	0.0171308	FALSE	66862168	0.0116289	0.0881125	9.87025e-06	0.282021	TRUE
ACNE	Genus Victivallis	rs12309087	C	T	1.10822	0.105117	0.0560503	FALSE	94759582	0.0431459	0.0519793	8.20808e-06	0.238861	TRUE
ACNE	Genus Victivallis	rs1105912	C	T	0.570208	0.0311102	0.600934	FALSE	26066396	0.0421027	0.0153063	5.27245e-06	0.11985	TRUE
ACNE	Genus Victivallis	rs34697205	T	C	-0.633747	0.039356	0.159471	FALSE	157447851	0.000538704	0.0204142	4.84269e-06	0.133079	TRUE
ACNE	Genus Victivallis	rs7028136	C	G	-0.601272	0.0213687	0.287092	FALSE	29658443	0.00196421	0.0165416	2.30821e-06	0.121846	TRUE
ACNE	Genus Victivallis	rs115699544	G	A	1.29633	0.0477901	0.017122	FALSE	66862168	0.00413983	0.0585014	9.87025e-06	0.282021	TRUE
ACNE	Genus Victivallis	rs12309087	C	T	1.10822	-0.0262728	0.0559616	FALSE	94759582	0.0042262	0.0327639	8.20808e-06	0.238861	TRUE
HIDRADENITISSUP	Phylum Lentisphaerae	rs10842522	A	G	-0.673318	-0.0110925	0.845007	FALSE	25286359	0.00592069	0.020701	9.69395e-06	0.146473	TRUE
HIDRADENITISSUP	Phylum Lentisphaerae	rs8079916	G	A	0.786437	-0.00980514	0.162804	FALSE	68514301	0.0062811	0.0202423	6.70028e-06	0.167851	TRUE
HIDRADENITISSUP	Phylum Lentisphaerae	rs13381295	A	G	1.08317	-0.0129096	0.0478285	FALSE	40969641	0.00711779	0.0349411	9.42956e-06	0.235292	TRUE
HIDRADENITISSUP	Phylum Lentisphaerae	rs1536171	A	G	-0.549112	-0.00503263	0.434877	FALSE	65313299	0.00738392	0.0150685	5.54156e-06	0.116082	TRUE
HIDRADENITISSUP	Phylum Lentisphaerae	rs1122486	A	T	-0.515658	0.0048563	0.391728	FALSE	97841388	0.00752929	0.0154276	6.05124e-06	0.109323	TRUE
HIDRADENITISSUP	Phylum Lentisphaerae	rs7241053	A	G	-0.588621	-0.00412209	0.547422	FALSE	6638010	0.00787822	0.0153157	6.17983e-07	0.112492	TRUE
HIDRADENITISSUP	Phylum Lentisphaerae	rs561406	A	G	0.560137	0.00378003	0.287747	FALSE	29243181	0.00819433	0.0165592	8.84469e-06	0.12127	TRUE
HIDRADENITISSUP	Phylum Lentisphaerae	rs1122486	A	T	-0.515658	0.0198619	0.391394	FALSE	97841388	0.00178694	0.0116913	6.05124e-06	0.109323	TRUE
HIDRADENITISSUP	Phylum Lentisphaerae	rs12309087	C	T	1.10822	-0.0409078	0.0562132	FALSE	94759582	0.00199701	0.0248593	8.20808e-06	0.238861	TRUE
HIDRADENITISSUP	Family Prevotellaceae	rs34697205	T	C	-0.633747	-0.0214259	0.158841	FALSE	157447851	0.00331086	0.0154514	4.84269e-06	0.133079	TRUE
HIDRADENITISSUP	Family Prevotellaceae	rs8079916	G	A	0.786437	-0.02029	0.162799	FALSE	68514301	0.00372606	0.0153526	6.70028e-06	0.167851	TRUE
HIDRADENITISSUP	Family Prevotellaceae	rs561406	A	G	0.560137	-0.0103104	0.287451	FALSE	29243181	0.00823992	0.0125678	8.84469e-06	0.12127	TRUE
HIDRADENITISSUP	Family Prevotellaceae	rs10842522	A	G	-0.673318	0.0126139	0.845161	FALSE	25286359	0.0084837	0.0157835	9.69395e-06	0.146473	TRUE
HIDRADENITISSUP	Family Prevotellaceae	rs13381295	A	G	1.08317	0.0210315	0.047574	FALSE	40969641	0.0086049	0.0266636	9.42956e-06	0.235292	TRUE
HIDRADENITISSUP	Family Prevotellaceae	rs1105912	C	T	0.570208	-0.00842513	0.600753	FALSE	26066396	0.00935548	0.0116032	5.27245e-06	0.11985	TRUE
HIDRADENITISSUP	Family Prevotellaceae	rs7241053	A	G	-0.588621	0.00680327	0.54776	FALSE	6638010	0.011159	0.0116119	6.17983e-07	0.112492	TRUE
HIDRADENITISSUP	Family Prevotellaceae	rs7028136	C	G	-0.601272	0.00563912	0.287144	FALSE	29658443	0.0130433	0.0125102	2.30821e-06	0.121846	TRUE
HIDRADENITISSUP	Family Prevotellaceae	rs115699544	G	A	1.29633	0.00939596	0.0171793	FALSE	66862168	0.016657	0.0445209	9.87025e-06	0.282021	TRUE
HIDRADENITISSUP	Family Prevotellaceae	rs1536171	A	G	-0.549112	0.0015882	0.4337	FALSE	65313299	0.0177899	0.0114306	5.54156e-06	0.116082	TRUE
HIDRADENITISSUP	Family Prevotellaceae	rs7241053	A	G	-0.588621	-0.0568207	0.547507	FALSE	6638010	0.000855145	0.0268321	6.17983e-07	0.112492	TRUE
HIDRADENITISSUP	Family Prevotellaceae	rs1105912	C	T	0.570208	-0.0512959	0.600596	FALSE	26066396	0.00139364	0.026814	5.27245e-06	0.11985	TRUE
HIDRADENITISSUP	Family Prevotellaceae	rs1122486	A	T	-0.515658	-0.0454211	0.391016	FALSE	97841388	0.00231905	0.0270203	6.05124e-06	0.109323	TRUE
HIDRADENITISSUP	Family Prevotellaceae	rs13381295	A	G	1.08317	0.0914599	0.0475849	FALSE	40969641	0.00340608	0.0613853	9.42956e-06	0.235292	TRUE
HIDRADENITISSUP	Family Prevotellaceae	rs8079916	G	A	0.786437	-0.0397708	0.162873	FALSE	68514301	0.00654408	0.035439	6.70028e-06	0.167851	TRUE
HIDRADENITISSUP	Family Prevotellaceae	rs34697205	T	C	-0.633747	0.0355915	0.158969	FALSE	157447851	0.00794145	0.0356171	4.84269e-06	0.133079	TRUE
HIDRADENITISSUP	Genus Bifidobacterium	rs12309087	C	T	1.10822	-0.0549006	0.0563302	FALSE	94759582	0.00844687	0.0572853	8.20808e-06	0.238861	TRUE
HIDRADENITISSUP	Genus Bifidobacterium	rs7028136	C	G	-0.601272	-0.0230714	0.286949	FALSE	29658443	0.0106649	0.0290194	2.30821e-06	0.121846	TRUE
HIDRADENITISSUP	Genus Bifidobacterium	rs115699544	G	A	1.29633	0.0594777	0.017175	FALSE	66862168	0.0140546	0.102619	9.87025e-06	0.282021	TRUE
HIDRADENITISSUP	Genus Bifidobacterium	rs10842522	A	G	-0.673318	0.0162983	0.845007	FALSE	25286359	0.0163476	0.036352	9.69395e-06	0.146473	TRUE
HIDRADENITISSUP	Genus Bifidobacterium	rs561406	A	G	0.560137	-0.0113574	0.287614	FALSE	29243181	0.0173928	0.0290385	8.84469e-06	0.12127	TRUE
HIDRADENITISSUP	Genus Bifidobacterium	rs1536171	A	G	-0.549112	0.00638892	0.433549	FALSE	65313299	0.0202232	0.0264211	5.54156e-06	0.116082	TRUE
HIDRADENITISSUP	Genus Bifidobacterium	rs10842522	A	G	-0.673318	0.0868811	0.845109	FALSE	25286359	0.000506417	0.0357865	9.69395e-06	0.146473	TRUE
HIDRADENITISSUP	Genus Bifidobacterium	rs8079916	G	A	0.786437	-0.0769893	0.16283	FALSE	68514301	0.00089693	0.0347919	6.70028e-06	0.167851	TRUE
HIDRADENITISSUP	Genus Bifidobacterium	rs12309087	C	T	1.10822	-0.0749665	0.056315	FALSE	94759582	0.00612093	0.0563799	8.20808e-06	0.238861	TRUE
HIDRADENITISSUP	Genus Bifidobacterium	rs1536171	A	G	-0.549112	0.028455	0.433617	FALSE	65313299	0.00908413	0.0259326	5.54156e-06	0.116082	TRUE
HIDRADENITISSUP	Genus Bifidobacterium	rs561406	A	G	0.560137	-0.0275462	0.287581	FALSE	29243181	0.0111441	0.0285322	8.84469e-06	0.12127	TRUE
HIDRADENITISSUP	Genus Bifidobacterium	rs34697205	T	C	-0.633747	0.0312582	0.158984	FALSE	157447851	0.0123359	0.0348736	4.84269e-06	0.133079	TRUE
HIDRADENITISSUP	Genus Bifidobacterium	rs1122486	A	T	-0.515658	-0.0202489	0.391074	FALSE	97841388	0.0148561	0.0265514	6.05124e-06	0.109323	TRUE
HIDRADENITISSUP	Genus Bifidobacterium	rs7241053	A	G	-0.588621	-0.0157858	0.547604	FALSE	6638010	0.0183027	0.0263474	6.17983e-07	0.112492	TRUE
HIDRADENITISSUP	Genus Bifidobacterium	rs13381295	A	G	1.08317	-0.0361302	0.047526	FALSE	40969641	0.0183118	0.060345	9.42956e-06	0.235292	TRUE
HIDRADENITISSUP	Genus Bifidobacterium	rs7028136	C	G	-0.601272	-0.0165324	0.286967	FALSE	29658443	0.0187234	0.0284887	2.30821e-06	0.121846	TRUE
HIDRADENITISSUP	Genus Bifidobacterium	rs115699544	G	A	1.29633	-0.0359378	0.0171621	FALSE	66862168	0.0239875	0.100116	9.87025e-06	0.282021	TRUE
HIDRADENITISSUP	Genus Bifidobacterium	rs1105912	C	T	0.570208	-0.00531851	0.600737	FALSE	26066396	0.0280015	0.0263504	5.27245e-06	0.11985	TRUE
HIDRADENITISSUP	Genus Bifidobacterium	rs72826444	T	C	-0.83598	-0.464288	0.0763271	FALSE	51123012	0.0155636	0.191934	7.19424e-06	0.182455	TRUE
HIDRADENITISSUP	Genus Eubacteriumfissicatenagroup	rs72826444	T	C	-0.83598	-0.103012	0.0760615	FALSE	51123012	0.0462519	0.0516847	7.19424e-06	0.182455	TRUE
HIDRADENITISSUP	Genus Eubacteriumfissicatenagroup	rs17375837	G	A	0.874612	0.492658	0.0448713	FALSE	123946165	0.0480895	0.249248	4.89161e-06	0.187344	TRUE
HIDRADENITISSUP	Genus Eubacteriumfissicatenagroup	rs6774189	G	A	-0.767721	0.0531158	0.0625387	FALSE	46551040	0.0256413	0.0238017	3.19639e-06	0.161197	TRUE
HIDRADENITISSUP	Genus Eubacteriumfissicatenagroup	rs1234358	T	C	0.41987	0.17788	0.2299	FALSE	150683943	0.000835584	0.0532458	4.88744e-06	0.0899336	TRUE
HIDRADENITISSUP	Genus Eubacteriumfissicatenagroup	rs771818	G	C	0.408326	0.092993	0.496381	FALSE	102039642	0.0463106	0.0466704	3.29121e-06	0.0858513	TRUE
HIDRADENITISSUP	Genus Eubacteriumfissicatenagroup	rs11579228	T	C	0.514029	0.114832	0.159897	FALSE	211378536	0.00962831	0.0443556	7.83167e-06	0.112661	TRUE
HIDRADENITISSUP	Genus Eubacteriumfissicatenagroup	rs953255	C	A	-0.565291	-0.117725	0.113933	FALSE	107527792	0.026019	0.052888	4.48193e-06	0.120584	TRUE
HIDRADENITISSUP	Genus Eubacteriumfissicatenagroup	rs771818	G	C	0.408326	0.0665537	0.496477	FALSE	102039642	0.0150897	0.0273859	3.29121e-06	0.0858513	TRUE
HIDRADENITISSUP	Genus Eubacteriumfissicatenagroup	rs4704226	G	A	0.543624	0.035814	0.216363	FALSE	71757272	0.0465372	0.0179926	9.36626e-06	0.120221	TRUE
HIDRADENITISSUP	Genus Fusicatenibacter	rs953255	C	A	-0.565291	0.0489913	0.113951	FALSE	107527792	0.0411491	0.0239915	4.48193e-06	0.120584	TRUE
HIDRADENITISSUP	Genus Fusicatenibacter	rs17617684	T	G	0.415187	-0.0485655	0.410235	FALSE	14230033	0.0133361	0.0196251	5.36888e-06	0.0893321	TRUE
HIDRADENITISSUP	Genus Fusicatenibacter	rs72826444	T	C	-0.83598	-0.379584	0.0762309	FALSE	51123012	0.0076929	0.142419	7.19424e-06	0.182455	TRUE
HIDRADENITISSUP	Genus Fusicatenibacter	rs149821435	A	G	0.564657	0.197359	0.153124	FALSE	102511288	0.0430864	0.0975638	1.95897e-06	0.115964	TRUE
HIDRADENITISSUP	Genus Fusicatenibacter	rs1234358	T	C	0.41987	0.034629	0.230111	FALSE	150683943	0.021713	0.0150865	4.88744e-06	0.0899336	TRUE
HIDRADENITISSUP	Genus Fusicatenibacter	rs6774189	G	A	-0.767721	-0.138214	0.0626043	FALSE	46551040	0.0307461	0.0639778	3.19639e-06	0.161197	TRUE
HIDRADENITISSUP	Genus Fusicatenibacter	rs17375837	G	A	0.874612	0.0429574	0.0452561	FALSE	123946165	0.017748	0.0181192	4.89161e-06	0.187344	TRUE
HIDRADENITISSUP	Genus Fusicatenibacter	rs72826444	T	C	-0.83598	0.363681	0.0761581	FALSE	51123012	0.0193433	0.155496	7.19424e-06	0.182455	TRUE
HIDRADENITISSUP	Genus Fusicatenibacter	rs6774189	G	A	-0.767721	0.391295	0.0626815	FALSE	46551040	0.0217425	0.170511	3.19639e-06	0.161197	TRUE
HIDRADENITISSUP	Genus Fusicatenibacter	rs11579228	T	C	0.514029	-0.0701371	0.159724	FALSE	211378536	0.0321292	0.0327315	7.83167e-06	0.112661	TRUE
HIDRADENITISSUP	Genus Fusicatenibacter	rs17375837	G	A	0.874612	0.0652361	0.0452561	FALSE	123946165	0.0322174	0.0304599	4.89161e-06	0.187344	TRUE
HIDRADENITISSUP	Genus Fusicatenibacter	rs771818	G	C	0.408326	-0.025081	0.496406	FALSE	102039642	0.0469073	0.0126217	3.29121e-06	0.0858513	TRUE
HIDRADENITISSUP	Genus Fusicatenibacter	rs17375837	G	A	0.874612	0.540933	0.0451752	FALSE	123946165	0.0366657	0.258886	4.89161e-06	0.187344	TRUE
HIDRADENITISSUP	Genus Fusicatenibacter	rs17375837	G	A	0.874612	0.0647946	0.0452351	FALSE	123946165	0.000725087	0.0360789	4.89161e-06	0.187344	TRUE
HIDRADENITISSUP	Genus Fusicatenibacter	rs149821435	A	G	0.564657	0.0342083	0.15318	FALSE	102511288	0.00101036	0.0208606	1.95897e-06	0.115964	TRUE
HIDRADENITISSUP	Genus Fusicatenibacter	rs771818	G	C	0.408326	-0.022688	0.496494	FALSE	102039642	0.00130048	0.0149864	3.29121e-06	0.0858513	TRUE
HIDRADENITISSUP	Genus Fusicatenibacter	rs1234358	T	C	0.41987	0.0197987	0.229909	FALSE	150683943	0.0026561	0.017785	4.88744e-06	0.0899336	TRUE
HIDRADENITISSUP	Genus Fusicatenibacter	rs4704226	G	A	0.543624	0.0181117	0.216352	FALSE	71757272	0.00319309	0.0181867	9.36626e-06	0.120221	TRUE
HIDRADENITISSUP	Genus Fusicatenibacter	rs6774189	G	A	-0.767721	-0.0277794	0.0625648	FALSE	46551040	0.00370037	0.0309898	3.19639e-06	0.161197	TRUE
ALOPECAREATA	Class Bacilli	rs11579228	T	C	0.514029	0.0101469	0.159892	FALSE	211378536	0.00618533	0.0203782	7.83167e-06	0.112661	TRUE
ALOPECAREATA	Class Bacilli	rs7028802	T	C	-0.630452	-0.0115204	0.0792304	FALSE	390228	0.0067799	0.027746	4.932e-06	0.135098	TRUE
ALOPECAREATA	Class Bacilli	rs72826444	T	C	-0.83598	-0.00897882	0.0760207	FALSE	51123012	0.00752	0.0284138	7.19424e-06	0.182455	TRUE
ALOPECAREATA	Class Bacilli	rs10149330	T	C	0.613248	-0.00728178	0.114806	FALSE	48241947	0.00756882	0.0235216	3.25133e-06	0.128864	TRUE
ALOPECAREATA	Class Bacilli	rs953255	C	A	-0.565291	-0.00421719	0.113919	FALSE	107527792	0.00858738	0.0236946	4.48193e-06	0.120584	TRUE
ALOPECAREATA	Class Bacilli	rs17617684	T	G	0.415187	0.00175342	0.410446	FALSE	14230033	0.00907888	0.0151545	5.36888e-06	0.0893321	TRUE
ALOPECAREATA	Class Bacilli	rs17617684	T	G	0.415187	-0.0229382	0.410122	FALSE	14230033	0.000921212	0.0114988	5.36888e-06	0.0893321	TRUE
ALOPECAREATA	Class Bacilli	rs10149330	T	C	0.613248	0.025497	0.11522	FALSE	48241947	0.0030111	0.0177362	3.25133e-06	0.128864	TRUE
ALOPECAREATA	Class Bacilli	rs7028802	T	C	-0.630452	0.0204721	0.0793787	FALSE	390228	0.0066008	0.0210178	4.932e-06	0.135098	TRUE
ALOPECAREATA	Class Bacilli	rs72826444	T	C	-0.83598	0.0183585	0.0759157	FALSE	51123012	0.0079346	0.0216626	7.19424e-06	0.182455	TRUE
ALOPECAREATA	Class Bacilli	rs1234358	T	C	0.41987	0.00801135	0.229455	FALSE	150683943	0.0110533	0.0134923	4.88744e-06	0.0899336	TRUE
ALOPECAREATA	Class Bacilli	rs149821435	A	G	0.564657	0.00880621	0.153379	FALSE	102511288	0.011553	0.0158151	1.95897e-06	0.115964	TRUE
ALOPECAREATA	Class Bacilli	rs771818	G	C	0.408326	-0.00533442	0.496457	FALSE	102039642	0.0127489	0.0113192	3.29121e-06	0.0858513	TRUE
ALOPECAREATA	Class Bacilli	rs17375837	G	A	0.874612	0.00803703	0.0451038	FALSE	123946165	0.0153843	0.0273924	4.89161e-06	0.187344	TRUE
ALOPECAREATA	Class Bacilli	rs953255	C	A	-0.565291	0.00245525	0.114515	FALSE	107527792	0.0178251	0.0179589	4.48193e-06	0.120584	TRUE
ALOPECAREATA	Class Bacilli	rs6774189	G	A	-0.767721	-0.00267825	0.06205	FALSE	46551040	0.0181825	0.0234639	3.19639e-06	0.161197	TRUE
ALOPECAREATA	Class Bacilli	rs4704226	G	A	0.543624	0.00147995	0.216571	FALSE	71757272	0.0182924	0.0138039	9.36626e-06	0.120221	TRUE
ALOPECAREATA	Class Bacilli	rs11579228	T	C	0.514029	-0.000691089	0.158859	FALSE	211378536	0.0192869	0.0154595	7.83167e-06	0.112661	TRUE
ALOPECAREATA	Class Clostridia	rs771818	G	C	0.408326	-0.052397	0.496257	FALSE	102039642	0.00114868	0.0262526	3.29121e-06	0.0858513	TRUE
ALOPECAREATA	Class Clostridia	rs72826444	T	C	-0.83598	0.0951814	0.0759993	FALSE	51123012	0.00143628	0.0500991	7.19424e-06	0.182455	TRUE
ALOPECAREATA	Class Clostridia	rs6774189	G	A	-0.767721	-0.0924718	0.0619571	FALSE	46551040	0.0021919	0.054147	3.19639e-06	0.161197	TRUE
ALOPECAREATA	Class Clostridia	rs17375837	G	A	0.874612	-0.0972176	0.0450398	FALSE	123946165	0.00308863	0.0631257	4.89161e-06	0.187344	TRUE
ALOPECAREATA	Class Clostridia	rs17617684	T	G	0.415187	-0.0249352	0.410383	FALSE	14230033	0.0087079	0.0265873	5.36888e-06	0.0893321	TRUE
ALOPECAREATA	Class Clostridia	rs149821435	A	G	0.564657	-0.0316472	0.153344	FALSE	102511288	0.0097037	0.036672	1.95897e-06	0.115964	TRUE
ALOPECAREATA	Class Clostridia	rs953255	C	A	-0.565291	-0.032715	0.114529	FALSE	107527792	0.0108575	0.0418427	4.48193e-06	0.120584	TRUE
ALOPECAREATA	Class Clostridia	rs11579228	T	C	0.514029	-0.0191188	0.158794	FALSE	211378536	0.0147619	0.0355271	7.83167e-06	0.112661	TRUE
ALOPECAREATA	Class Clostridia	rs10149330	T	C	0.613248	-0.0208038	0.115027	FALSE	48241947	0.015327	0.04114	3.25133e-06	0.128864	TRUE
ALOPECAREATA	Class Clostridia	rs4704226	G	A	0.543624	-0.0115776	0.216618	FALSE	71757272	0.01792	0.0319174	9.36626e-06	0.120221	TRUE
ALOPECAREATA	Order Lactobacillales	rs7028802	T	C	-0.630452	-0.0120418	0.079291	FALSE	390228	0.0201291	0.0488176	4.932e-06	0.135098	TRUE
ALOPECAREATA	Order Lactobacillales	rs1234358	T	C	0.41987	-0.0050212	0.229316	FALSE	150683943	0.0218004	0.0311691	4.88744e-06	0.0899336	TRUE
ALOPECAREATA	Order Lactobacillales	rs17617684	T	G	0.415187	-0.0614775	0.410271	FALSE	14230033	0.00062038	0.0261248	5.36888e-06	0.0893321	TRUE
ALOPECAREATA	Order Lactobacillales	rs72826444	T	C	-0.83598	0.106414	0.0760168	FALSE	51123012	0.00099671	0.0490069	7.19424e-06	0.182455	TRUE
ALOPECAREATA	Order Lactobacillales	rs11579228	T	C	0.514029	0.0566703	0.158901	FALSE	211378536	0.0034718	0.0348731	7.83167e-06	0.112661	TRUE
ALOPECAREATA	Order Lactobacillales	rs7028802	T	C	-0.630452	-0.0708164	0.0792542	FALSE	390228	0.00460927	0.0477768	4.932e-06	0.135098	TRUE
ALOPECAREATA	Order Lactobacillales	rs953255	C	A	-0.565291	0.0521664	0.114626	FALSE	107527792	0.0067153	0.0408378	4.48193e-06	0.120584	TRUE
ALOPECAREATA	Order Lactobacillales	rs6774189	G	A	-0.767721	0.0371013	0.0620459	FALSE	46551040	0.0160845	0.0528337	3.19639e-06	0.161197	TRUE
ALOPECAREATA	Order Lactobacillales	rs771818	G	C	0.408326	-0.0160613	0.496361	FALSE	102039642	0.017748	0.0257275	3.29121e-06	0.0858513	TRUE
ALOPECAREATA	Order Lactobacillales	rs4704226	G	A	0.543624	-0.010796	0.216609	FALSE	71757272	0.0243532	0.0313532	9.36626e-06	0.120221	TRUE
ALOPECAREATA	Order Lactobacillales	rs17375837	G	A	0.874612	0.0208432	0.0450915	FALSE	123946165	0.0245464	0.0619165	4.89161e-06	0.187344	TRUE
ALOPECAREATA	Order Lactobacillales	rs1234358	T	C	0.41987	0.010195	0.229352	FALSE	150683943	0.0246441	0.0306388	4.88744e-06	0.0899336	TRUE
ALOPECAREATA	Order Lactobacillales	rs10149330	T	C	0.613248	-0.00174025	0.115038	FALSE	48241947	0.0321885	0.0404169	3.25133e-06	0.128864	TRUE
ALOPECAREATA	Order Lactobacillales	rs149821435	A	G	0.564657	-0.000343267	0.153386	FALSE	102511288	0.0330793	0.0359429	1.95897e-06	0.115964	TRUE
ALOPECAREATA	Order Lactobacillales	rs56095407	T	C	0.716112	-0.0945732	0.0751759	FALSE	52832483	0.00232503	0.0521487	3.51e-06	0.150636	TRUE
ALOPECAREATA	Order Mollicutesrf9	rs9834904	T	C	0.59956	-0.0576952	0.150478	FALSE	6058575	0.00434043	0.0381264	2.12e-06	0.123237	TRUE
ALOPECAREATA	Order Mollicutesrf9	rs10908512	T	C	0.442983	-0.025628	0.467361	FALSE	153884022	0.0115563	0.027234	2.65e-06	0.0919736	TRUE
ALOPECAREATA	Order Mollicutesrf9	rs11722292	C	T	-0.445149	0.020528	0.353189	FALSE	167033463	0.0157711	0.0286147	3.92e-06	0.0941262	TRUE
ALOPECAREATA	Order Mollicutesrf9	rs59106012	C	T	-0.442939	-0.0115272	0.312385	FALSE	124637068	0.0231297	0.0292879	4.81e-06	0.0945749	TRUE
ALOPECAREATA	Order Mollicutesrf9	rs2060907	A	G	0.648865	-0.0182825	0.0963461	FALSE	29184156	0.0232446	0.0470086	3.13e-07	0.123129	TRUE
ALOPECAREATA	Order Mollicutesrf9	rs2610983	C	A	0.423634	0.00171326	0.48633	FALSE	21318784	0.0316612	0.0272323	8.9e-06	0.0932285	TRUE
ALOPECAREATA	Order Mollicutesrf9	rs10908512	T	C	0.442983	-0.169607	0.466574	FALSE	153884022	0.00380181	0.1016	2.6451e-06	0.0919736	TRUE
ALOPECAREATA	Order Mollicutesrf9	rs2610983	C	A	0.423634	-0.0881348	0.486084	FALSE	21318784	0.0154867	0.101918	8.89767e-06	0.0932285	TRUE
ALOPECAREATA	Order Mollicutesrf9	rs59106012	C	T	-0.442939	-0.0870054	0.312722	FALSE	124637068	0.0171193	0.109765	4.81358e-06	0.0945749	TRUE
ALOPECAREATA	Order Mollicutesrf9	rs56095407	T	C	0.716112	-0.145131	0.0753663	FALSE	52832483	0.0183017	0.195358	3.51036e-06	0.150636	TRUE
ALOPECAREATA	Order Mollicutesrf9	rs9834904	T	C	0.59956	0.0777526	0.150356	FALSE	6058575	0.0234284	0.142649	2.11785e-06	0.123237	TRUE
ALOPECAREATA	Order Mollicutesrf9	rs2060907	A	G	0.648865	0.0826814	0.0962134	FALSE	29184156	0.0253897	0.174042	3.12929e-07	0.123129	TRUE
ALOPECAREATA	Order Mollicutesrf9	rs11722292	C	T	-0.445149	0.0134261	0.352887	FALSE	167033463	0.0360221	0.107439	3.92195e-06	0.0941262	TRUE
ALOPECAREATA	Genus Butyricimonas	rs7229135	C	T	-0.475382	-0.248642	0.405467	FALSE	11031065	0.016065	0.103281	3.31149e-06	0.0987121	TRUE
ALOPECAREATA	Genus Butyricimonas	rs114307200	A	G	0.988822	0.360638	0.0329368	FALSE	141135380	0.0195339	0.154437	5.5141e-06	0.210449	TRUE
ALOPECAREATA	Genus Butyricimonas	rs34418609	T	A	-0.602841	0.0684582	0.266271	FALSE	48943675	0.0265656	0.0308671	1.9949e-06	0.122269	TRUE
ALOPECAREATA	Genus Butyricimonas	rs34418609	T	A	-0.602841	-0.0861775	0.266395	FALSE	48943675	0.00605857	0.031399	1.9949e-06	0.122269	TRUE
ALOPECAREATA	Genus Butyricimonas	rs34418609	T	A	-0.602841	-0.0357663	0.265928	FALSE	48943675	0.0332415	0.0167984	1.9949e-06	0.122269	TRUE
ALOPECAREATA	Genus Butyricimonas	rs7229135	C	T	-0.475382	-0.251772	0.404932	FALSE	11031065	0.0114644	0.0995848	3.31149e-06	0.0987121	TRUE
ALOPECAREATA	Genus Butyricimonas	rs6758239	G	A	-0.700995	-0.071515	0.919924	FALSE	56847594	0.0096732	0.0276408	9.03992e-06	0.152955	TRUE
ALOPECAREATA	Genus Butyricimonas	rs34418609	T	A	-0.602841	-0.0266701	0.265928	FALSE	48943675	0.00168508	0.00849161	1.9949e-06	0.122269	TRUE
ALOPECAREATA	Genus Butyricimonas	rs6758239	G	A	-0.700995	-0.0901759	0.91992	FALSE	56847594	0.0415633	0.0442501	9.03992e-06	0.152955	TRUE
ALOPECAREATA	Genus Butyricimonas	rs13092091	A	G	0.848185	0.0405773	0.0783838	FALSE	193116109	0.00147211	0.0279949	3.27247e-06	0.176025	TRUE
ALOPECAREATA	Genus Butyricimonas	rs34418609	T	A	-0.602841	-0.0219581	0.265909	FALSE	48943675	0.00194493	0.0169246	1.9949e-06	0.122269	TRUE
ALOPECAREATA	Genus Butyricimonas	rs10503306	T	C	0.550834	0.020032	0.175844	FALSE	5476626	0.00309084	0.0196943	9.81302e-06	0.120701	TRUE
ALOPECAREATA	Genus Butyricimonas	rs7229135	C	T	-0.475382	0.00891714	0.404975	FALSE	11031065	0.00557783	0.0152134	3.31149e-06	0.0987121	TRUE
ALOPECAREATA	Genus Dialister	rs114307200	A	G	0.988822	-0.0129318	0.0330058	FALSE	141135380	0.00759469	0.0422362	5.5141e-06	0.210449	TRUE
ALOPECAREATA	Genus Dialister	rs10800395	A	G	0.615117	-0.00469089	0.226882	FALSE	168917012	0.00793164	0.0178902	1.94012e-06	0.124601	TRUE
ALOPECAREATA	Genus Dialister	rs6758239	G	A	-0.700995	0.00384038	0.919974	FALSE	56847594	0.0088945	0.0276286	9.03992e-06	0.152955	TRUE
ALOPECAREATA	Genus Dialister	rs6758239	G	A	-0.700995	0.0524495	0.92013	FALSE	56847594	0.000237526	0.0208481	9.03992e-06	0.152955	TRUE
ALOPECAREATA	Genus Dialister	rs34418609	T	A	-0.602841	-0.0264824	0.265981	FALSE	48943675	0.000785506	0.0128475	1.9949e-06	0.122269	TRUE
ALOPECAREATA	Genus Dialister	rs10800395	A	G	0.615117	-0.0158239	0.226858	FALSE	168917012	0.00484168	0.0135271	1.94012e-06	0.124601	TRUE
ALOPECAREATA	Genus Dialister	rs114307200	A	G	0.988822	0.0210894	0.0327134	FALSE	141135380	0.0102424	0.0321711	5.5141e-06	0.210449	TRUE
ALOPECAREATA	Genus Dialister	rs7229135	C	T	-0.475382	-0.00722669	0.405513	FALSE	11031065	0.0106249	0.0115423	3.31149e-06	0.0987121	TRUE
ALOPECAREATA	Genus Dialister	rs10503306	T	C	0.550834	-0.00469651	0.175966	FALSE	5476626	0.0150813	0.0149913	9.81302e-06	0.120701	TRUE
ALOPECAREATA	Genus Dialister	rs13092091	A	G	0.848185	0.00104273	0.0783197	FALSE	193116109	0.0192138	0.0211554	3.27247e-06	0.176025	TRUE
ALOPECAREATA	Genus Dialister	rs7229135	C	T	-0.475382	-0.0585988	0.405544	FALSE	11031065	0.000696548	0.0266451	3.31149e-06	0.0987121	TRUE
ALOPECAREATA	Genus Eubacteriumnodatumgroup	rs6758239	G	A	-0.700995	-0.0683243	0.919883	FALSE	56847594	0.00392348	0.0482707	9.03992e-06	0.152955	TRUE
ALOPECAREATA	Genus Eubacteriumnodatumgroup	rs13092091	A	G	0.848185	0.0477751	0.0783163	FALSE	193116109	0.00821262	0.0488933	3.27247e-06	0.176025	TRUE
ALOPECAREATA	Genus Eubacteriumnodatumgroup	rs114307200	A	G	0.988822	0.0703797	0.0327033	FALSE	141135380	0.00860457	0.0744025	5.5141e-06	0.210449	TRUE
ALOPECAREATA	Genus Eubacteriumnodatumgroup	rs10800395	A	G	0.615117	-0.02156	0.226844	FALSE	168917012	0.012279	0.031316	1.94012e-06	0.124601	TRUE
ALOPECAREATA	Genus Eubacteriumnodatumgroup	rs34418609	T	A	-0.602841	0.0199383	0.266319	FALSE	48943675	0.0125356	0.0296591	1.9949e-06	0.122269	TRUE
ALOPECAREATA	Genus Eubacteriumnodatumgroup	rs10503306	T	C	0.550834	-0.00973565	0.176092	FALSE	5476626	0.0194642	0.0346234	9.81302e-06	0.120701	TRUE
ALOPECAREATA	Genus Eubacteriumnodatumgroup	rs6758239	G	A	-0.700995	-0.0413378	0.919889	FALSE	56847594	0.0126291	0.0469761	9.03992e-06	0.152955	TRUE
ALOPECAREATA	Genus Eubacteriumnodatumgroup	rs114307200	A	G	0.988822	0.0407249	0.0326903	FALSE	141135380	0.0192998	0.0733972	5.5141e-06	0.210449	TRUE
ALOPECAREATA	Genus Eubacteriumnodatumgroup	rs7229135	C	T	-0.475382	-0.0106571	0.405654	FALSE	11031065	0.0227895	0.0261562	3.31149e-06	0.0987121	TRUE
ALOPECAREATA	Genus Eubacteriumnodatumgroup	rs10503306	T	C	0.550834	-0.0122052	0.176089	FALSE	5476626	0.0239628	0.0339078	9.81302e-06	0.120701	TRUE
ALOPECAREATA	Genus Eubacteriumnodatumgroup	rs10800395	A	G	0.615117	0.00703758	0.226913	FALSE	168917012	0.02729	0.0307025	1.94012e-06	0.124601	TRUE
ALOPECAREATA	Genus Faecalibacterium	rs13092091	A	G	0.848185	0.00793581	0.0782906	FALSE	193116109	0.0289556	0.0479933	3.27247e-06	0.176025	TRUE
ALOPECAREATA	Genus Faecalibacterium	rs34418609	T	A	-0.602841	-0.000348974	0.266283	FALSE	48943675	0.0330147	0.0291268	1.9949e-06	0.122269	TRUE
ALOPECAREATA	Genus Faecalibacterium	rs9820287	T	C	0.558929	0.0530107	0.179162	FALSE	133165906	0.00449727	0.0354589	5.08e-06	0.11888	TRUE
ALOPECAREATA	Genus Faecalibacterium	rs1563054	C	T	-0.576221	-0.0432267	0.236271	FALSE	44796080	0.0059322	0.03209	2.61e-06	0.118736	TRUE
ALOPECAREATA	Genus Faecalibacterium	rs11044406	A	G	0.943457	0.0168008	0.0905843	FALSE	19083553	0.024221	0.0480557	6.52e-06	0.203148	TRUE
ALOPECAREATA	Genus Faecalibacterium	rs10433290	A	G	0.613774	-0.00301635	0.229942	FALSE	17545891	0.0308465	0.0322115	2.16e-06	0.125404	TRUE
ALOPECAREATA	Genus Faecalibacterium	rs8074279	C	T	0.468643	0.00189445	0.728574	FALSE	61717266	0.0316929	0.0306949	5.83e-06	0.100347	TRUE
ALOPECAREATA	Genus Faecalibacterium	rs1563054	C	T	-0.576221	-0.217754	0.236477	FALSE	44796080	0.00279042	0.120076	2.6054e-06	0.118736	TRUE
ALOPECAREATA	Genus Faecalibacterium	rs11044406	A	G	0.943457	0.159428	0.0903759	FALSE	19083553	0.0153062	0.182618	6.52471e-06	0.203148	TRUE
ALOPECAREATA	Genus Faecalibacterium	rs9820287	T	C	0.558929	0.108253	0.179158	FALSE	133165906	0.0165364	0.132353	5.08253e-06	0.11888	TRUE
ALOPECAREATA	Genus Peptococcus	rs8074279	C	T	0.468643	-0.0905347	0.728477	FALSE	61717266	0.017177	0.114575	5.82728e-06	0.100347	TRUE
ALOPECAREATA	Genus Peptococcus	rs10433290	A	G	0.613774	0.0364186	0.230474	FALSE	17545891	0.0304583	0.119969	2.16432e-06	0.125404	TRUE
ALOPECAREATA	Genus Peptococcus	rs73136542	A	G	0.941252	0.531096	0.0389413	FALSE	8650680	0.0122752	0.212088	5.3729e-06	0.200807	TRUE
ALOPECAREATA	Genus Peptococcus	rs6996139	T	C	0.483451	0.131096	0.337221	FALSE	129543825	0.0227248	0.0575479	4.30599e-06	0.102039	TRUE
ALOPECAREATA	Genus Peptococcus	rs640184	G	A	-0.639823	-0.0319082	0.855494	FALSE	98354047	0.0495872	0.0162507	2.53531e-06	0.131723	TRUE
ALOPECAREATA	Genus Peptococcus	rs76013506	G	A	0.686727	0.0964629	0.0932235	FALSE	63691726	0.0411244	0.047233	6.16525e-07	0.132916	TRUE
ALOPECAREATA	Genus Peptococcus	rs17241022	A	G	0.811424	0.0951165	0.124803	FALSE	57920621	0.0373783	0.0456937	1.24368e-06	0.161806	TRUE
ALOPECAREATA	Genus Peptococcus	rs73136542	A	G	0.941252	0.097533	0.0393874	FALSE	8650680	0.0134036	0.0394413	5.3729e-06	0.200807	TRUE
ALOPECAREATA	Genus Peptococcus	rs17241022	A	G	0.811424	0.064928	0.124848	FALSE	57920621	0.026421	0.0292473	1.24368e-06	0.161806	TRUE
ALOPECAREATA	Genus Peptococcus	rs640184	G	A	-0.639823	-0.0572929	0.855554	FALSE	98354047	0.0376886	0.0275682	2.53531e-06	0.131723	TRUE
ALOPECAREATA	Genus Peptococcus	rs11569020	G	A	0.928615	-0.328634	0.0638498	FALSE	109981913	0.0212687	0.142687	5.01765e-06	0.197451	TRUE
ALOPECAREATA	Genus Peptococcus	rs12583353	G	A	0.720948	-0.0704937	0.148249	FALSE	37493438	0.0222218	0.0308296	7.15289e-06	0.156002	TRUE
ALOPECAREATA	Genus Peptococcus	rs7117184	A	G	0.767815	0.069158	0.0694134	FALSE	88341550	0.00450215	0.0243459	4.48627e-06	0.162378	TRUE
ALOPECAREATA	Genus Peptococcus	rs12583353	G	A	0.720948	-0.0414529	0.148281	FALSE	37493438	0.0193508	0.0177248	7.15289e-06	0.156002	TRUE
ALOPECAREATA	Genus Ruminococcus2	rs17241022	A	G	0.811424	0.0401939	0.124979	FALSE	57920621	0.0350397	0.0190682	1.24368e-06	0.161806	TRUE
ALOPECAREATA	Genus Ruminococcus2	rs7117184	A	G	0.767815	0.0370715	0.069505	FALSE	88341550	0.0115372	0.014676	4.48627e-06	0.162378	TRUE
ALOPECAREATA	Genus Ruminococcus2	rs643106	T	A	-0.93612	0.341792	0.925209	FALSE	125148521	0.0110405	0.134489	6.08459e-06	0.200937	TRUE
ALOPECAREATA	Genus Ruminococcus2	rs73136542	A	G	0.941252	0.339619	0.0393604	FALSE	8650680	0.0459759	0.170182	5.3729e-06	0.200807	TRUE
ALOPECAREATA	Genus Ruminococcus2	rs643106	T	A	-0.93612	0.37637	0.925225	FALSE	125148521	0.001562	0.118995	6.08459e-06	0.200937	TRUE
ALOPECAREATA	Genus Ruminococcus2	rs73136542	A	G	0.941252	0.447787	0.039366	FALSE	8650680	0.0362343	0.213814	5.3729e-06	0.200807	TRUE
ALOPECAREATA	Genus Ruminococcus2	rs6996139	T	C	0.483451	0.0599504	0.337051	FALSE	129543825	0.0496135	0.0305358	4.30599e-06	0.102039	TRUE
ALOPECAREATA	Genus Ruminococcus2	rs12583353	G	A	0.720948	0.184285	0.148624	FALSE	37493438	0.0422367	0.0907281	7.15289e-06	0.156002	TRUE
ALOPECAREATA	Genus Ruminococcus2	rs640184	G	A	-0.639823	0.179662	0.855356	FALSE	98354047	0.0495838	0.0914991	2.53531e-06	0.131723	TRUE
ALOPECAREATA	Genus Ruminococcus2	rs12583353	G	A	0.720948	0.339104	0.148621	FALSE	37493438	0.00825239	0.128372	7.15289e-06	0.156002	TRUE
ALOPECAREATA	Genus Ruminococcus2	rs12583353	G	A	0.720948	-0.0425275	0.148437	FALSE	37493438	0.0447414	0.0211888	7.15289e-06	0.156002	TRUE
ALOPECAREATA	Genus Ruminococcus2	rs73136542	A	G	0.941252	0.058851	0.0394036	FALSE	8650680	0.00126898	0.0385542	5.3729e-06	0.200807	TRUE
ALOPECAREATA	Genus Ruminococcus2	rs640184	G	A	-0.639823	0.0312298	0.855429	FALSE	98354047	0.00142075	0.0212722	2.53531e-06	0.131723	TRUE
ALOPECAREATA	Genus Ruminococcus2	rs6996139	T	C	0.483451	-0.0176356	0.337202	FALSE	129543825	0.00265456	0.0158367	4.30599e-06	0.102039	TRUE
ALOPECAREATA	Genus Ruminococcus2	rs7117184	A	G	0.767815	0.0287562	0.0694881	FALSE	88341550	0.00328264	0.0294146	4.48627e-06	0.162378	TRUE
ALOPECAREATA	Genus Slackia	rs12049373	A	T	-0.454683	0.0144922	0.433369	FALSE	15790823	0.00337485	0.0151094	1.38728e-06	0.0911031	TRUE
ALOPECAREATA	Genus Slackia	rs11569020	G	A	0.928615	0.0245989	0.0638769	FALSE	109981913	0.00420088	0.0305095	5.01765e-06	0.197451	TRUE
ALOPECAREATA	Genus Slackia	rs17241022	A	G	0.811424	0.00692258	0.124796	FALSE	57920621	0.0075974	0.0226359	1.24368e-06	0.161806	TRUE
ALOPECAREATA	Genus Slackia	rs643106	T	A	-0.93612	0.00111812	0.92525	FALSE	125148521	0.00968559	0.0283674	6.08459e-06	0.200937	TRUE
ALOPECAREATA	Genus Slackia	rs76013506	G	A	0.686727	3.13077e-05	0.0931262	FALSE	63691726	0.00999029	0.0257351	6.16525e-07	0.132916	TRUE
ALOPECAREATA	Genus Slackia	rs76013506	G	A	0.686727	0.049846	0.0929308	FALSE	63691726	0.00020878	0.019464	6.16525e-07	0.132916	TRUE
ALOPECANDRO	Family Acidaminococcaceae	rs7117184	A	G	0.767815	-0.0438737	0.0693076	FALSE	88341550	0.000973688	0.0222557	4.48627e-06	0.162378	TRUE
ALOPECANDRO	Family Acidaminococcaceae	rs643106	T	A	-0.93612	0.0308397	0.925323	FALSE	125148521	0.00299218	0.0214029	6.08459e-06	0.200937	TRUE
ALOPECANDRO	Family Acidaminococcaceae	rs640184	G	A	-0.639823	-0.018071	0.855384	FALSE	98354047	0.00525542	0.0161368	2.53531e-06	0.131723	TRUE
ALOPECANDRO	Family Acidaminococcaceae	rs6996139	T	C	0.483451	-0.00786091	0.336173	FALSE	129543825	0.010239	0.0119866	4.30599e-06	0.102039	TRUE
ALOPECANDRO	Family Acidaminococcaceae	rs12583353	G	A	0.720948	-0.0101562	0.149096	FALSE	37493438	0.0105424	0.0160595	7.15289e-06	0.156002	TRUE
ALOPECANDRO	Family Acidaminococcaceae	rs12049373	A	T	-0.454683	-0.00591374	0.433328	FALSE	15790823	0.0121139	0.0114557	1.38728e-06	0.0911031	TRUE
ALOPECANDRO	Family Acidaminococcaceae	rs73136542	A	G	0.941252	-0.0106775	0.0391702	FALSE	8650680	0.0142934	0.029206	5.3729e-06	0.200807	TRUE
ALOPECANDRO	Genus Anaerofilum	rs17241022	A	G	0.811424	0.00545006	0.124842	FALSE	57920621	0.0150205	0.017177	1.24368e-06	0.161806	TRUE
ALOPECANDRO	Genus Anaerofilum	rs11569020	G	A	0.928615	0.00453069	0.0634378	FALSE	109981913	0.0168957	0.0231419	5.01765e-06	0.197451	TRUE
ALOPECANDRO	Genus Anaerofilum	rs640184	G	A	-0.639823	-0.103436	0.855343	FALSE	98354047	0.000108071	0.0362476	2.53531e-06	0.131723	TRUE
ALOPECANDRO	Genus Anaerofilum	rs643106	T	A	-0.93612	0.102226	0.92533	FALSE	125148521	0.00096605	0.0494329	6.08459e-06	0.200937	TRUE
ALOPECANDRO	Genus Anaerofilum	rs73136542	A	G	0.941252	0.112755	0.0392222	FALSE	8650680	0.00229229	0.0668562	5.3729e-06	0.200807	TRUE
ALOPECANDRO	Genus Anaerofilum	rs11569020	G	A	0.928615	0.064701	0.0634317	FALSE	109981913	0.00558922	0.0531603	5.01765e-06	0.197451	TRUE
ALOPECANDRO	Genus Anaerofilum	rs12049373	A	T	-0.454683	0.0290012	0.43352	FALSE	15790823	0.00686033	0.0265347	1.38728e-06	0.0911031	TRUE
ALOPECANDRO	Genus Anaerofilum	rs76013506	G	A	0.686727	0.0477329	0.0926352	FALSE	63691726	0.00720843	0.0449557	6.16525e-07	0.132916	TRUE
ALOPECANDRO	Genus Anaerofilum	rs12583353	G	A	0.720948	-0.0367927	0.149181	FALSE	37493438	0.00807275	0.0372209	7.15289e-06	0.156002	TRUE
ALOPECANDRO	Genus Anaerofilum	rs7117184	A	G	0.767815	-0.0466654	0.0694144	FALSE	88341550	0.0090556	0.0512167	4.48627e-06	0.162378	TRUE
ALOPECANDRO	Genus Olsenella	rs17241022	A	G	0.811424	0.033247	0.124832	FALSE	57920621	0.0100821	0.0397802	1.24368e-06	0.161806	TRUE
ALOPECANDRO	Genus Olsenella	rs6996139	T	C	0.483451	-0.0218483	0.336037	FALSE	129543825	0.0107615	0.027712	4.30599e-06	0.102039	TRUE
ALOPECANDRO	Genus Olsenella	rs7117184	A	G	0.767815	-0.10333	0.0693795	FALSE	88341550	0.00131983	0.0502101	4.48627e-06	0.162378	TRUE
ALOPECANDRO	Genus Olsenella	rs11569020	G	A	0.928615	-0.105814	0.0633134	FALSE	109981913	0.00148094	0.0526427	5.01765e-06	0.197451	TRUE
ALOPECANDRO	Genus Olsenella	rs6996139	T	C	0.483451	0.0232163	0.33615	FALSE	129543825	0.0131103	0.0271971	4.30599e-06	0.102039	TRUE
ALOPECANDRO	Genus Olsenella	rs12583353	G	A	0.720948	-0.0289366	0.149182	FALSE	37493438	0.0143207	0.0366362	7.15289e-06	0.156002	TRUE
ALOPECANDRO	Genus Olsenella	rs17241022	A	G	0.811424	-0.0242123	0.124783	FALSE	57920621	0.0178317	0.0390227	1.24368e-06	0.161806	TRUE
ALOPECANDRO	Genus Olsenella	rs640184	G	A	-0.639823	-0.0187789	0.855458	FALSE	98354047	0.0202792	0.0366496	2.53531e-06	0.131723	TRUE
ALOPECANDRO	Genus Olsenella	rs643106	T	A	-0.93612	0.0236388	0.92527	FALSE	125148521	0.0208631	0.0484885	6.08459e-06	0.200937	TRUE
ALOPECANDRO	Genus Olsenella	rs73136542	A	G	0.941252	0.00862064	0.0391823	FALSE	8650680	0.0298669	0.0659529	5.3729e-06	0.200807	TRUE
ALOPECANDRO	Genus Ruminococcaceaeucg004	rs12049373	A	T	-0.454683	-0.00217907	0.433435	FALSE	15790823	0.031112	0.0260599	1.38728e-06	0.0911031	TRUE
ALOPECANDRO	Genus Ruminococcaceaeucg004	rs76013506	G	A	0.686727	-0.0010774	0.0926123	FALSE	63691726	0.0326807	0.0439017	6.16525e-07	0.132916	TRUE
ALOPECANDRO	Genus Ruminococcaceaeucg004	rs74383656	A	G	-0.753563	0.0907573	0.084314	FALSE	123534463	0.00211266	0.0488856	4.97e-06	0.161526	TRUE
ALOPECANDRO	Genus Ruminococcaceaeucg004	rs4072727	C	T	-0.425122	0.0326748	0.368349	FALSE	48039184	0.0081684	0.0281085	9.9e-06	0.0942725	TRUE
ALOPECANDRO	Genus Ruminococcaceaeucg004	rs10978947	A	G	-0.676575	0.0408792	0.0943612	FALSE	107624453	0.0126184	0.0464237	5.82e-06	0.14613	TRUE
ALOPECANDRO	Genus Ruminococcaceaeucg004	rs72836640	C	T	-0.586305	0.0249865	0.130798	FALSE	40216894	0.017794	0.0401591	4.68e-06	0.125314	TRUE
ALOPECANDRO	Genus Ruminococcaceaeucg004	rs6780738	A	G	0.553497	-0.0176508	0.286228	FALSE	71316345	0.0185517	0.0300198	2.76e-07	0.104831	TRUE
ALOPECANDRO	Genus Ruminococcaceaeucg004	rs78761638	A	G	-0.698573	-0.0221473	0.0909162	FALSE	91440545	0.0213479	0.0474159	1.36e-06	0.141201	TRUE
ALOPECANDRO	Genus Ruminococcaceaeucg004	rs12959849	T	C	0.667096	0.00636823	0.835659	FALSE	45636045	0.0287673	0.0369107	3.18e-06	0.140031	TRUE
ALOPECANDRO	Genus Ruminococcaceaeucg004	rs13041449	A	G	-0.549651	-0.000122996	0.161247	FALSE	13689664	0.0332453	0.0371714	5.11e-06	0.117968	TRUE
ALOPECANDRO	Genus Ruminococcaceaeucg004	rs10978947	A	G	-0.676575	-0.268694	0.0941903	FALSE	107624453	0.00489732	0.173952	5.82106e-06	0.14613	TRUE
ROSACEANAS	Phylum Cyanobacteria	rs13041449	A	G	-0.549651	-0.213493	0.161109	FALSE	13689664	0.00496752	0.138863	5.10526e-06	0.117968	TRUE
ROSACEANAS	Phylum Cyanobacteria	rs4072727	C	T	-0.425122	0.0921112	0.368571	FALSE	48039184	0.0152128	0.104993	9.90138e-06	0.0942725	TRUE
ROSACEANAS	Phylum Cyanobacteria	rs78761638	A	G	-0.698573	-0.137968	0.0906153	FALSE	91440545	0.0173331	0.17609	1.36415e-06	0.141201	TRUE
ROSACEANAS	Phylum Cyanobacteria	rs6780738	A	G	0.553497	0.0855527	0.286656	FALSE	71316345	0.0178885	0.112559	2.76113e-07	0.104831	TRUE
ROSACEANAS	Phylum Cyanobacteria	rs74383656	A	G	-0.753563	-0.084049	0.0842252	FALSE	123534463	0.0258543	0.183182	4.97081e-06	0.161526	TRUE
ROSACEANAS	Phylum Cyanobacteria	rs12959849	T	C	0.667096	-0.0621874	0.834905	FALSE	45636045	0.0261668	0.138819	3.1836e-06	0.140031	TRUE
ROSACEANAS	Phylum Cyanobacteria	rs72836640	C	T	-0.586305	-0.0450823	0.130376	FALSE	40216894	0.0305735	0.15038	4.68097e-06	0.125314	TRUE
ROSACEANAS	Phylum Cyanobacteria	rs2560691	A	G	0.523757	-0.0454649	0.240658	FALSE	116018886	0.00511047	0.0318399	1.77e-07	0.0974374	TRUE
ROSACEANAS	Class Clostridia	rs2856330	T	C	0.653799	-0.0372096	0.88401	FALSE	11789843	0.0134159	0.0444448	5.52e-06	0.14074	TRUE
ROSACEANAS	Class Clostridia	rs1539567	G	A	0.514454	-0.0271474	0.873863	FALSE	127479887	0.016961	0.0410912	4.96e-06	0.110171	TRUE
ROSACEANAS	Class Clostridia	rs2832084	G	A	-0.518166	-0.00864802	0.215257	FALSE	28782476	0.026455	0.0330615	8.12e-06	0.113675	TRUE
ROSACEANAS	Class Clostridia	rs12884121	C	A	-0.566749	0.0058511	0.232814	FALSE	70002137	0.0285131	0.0321061	2.86e-06	0.118291	TRUE
ROSACEANAS	Class Clostridia	rs2856330	T	C	0.653799	0.140184	0.884294	FALSE	11789843	0.0160401	0.166919	5.52142e-06	0.14074	TRUE
ROSACEANAS	Class Clostridia	rs2832084	G	A	-0.518166	-0.0963657	0.214916	FALSE	28782476	0.0173268	0.12295	8.11652e-06	0.113675	TRUE
ROSACEANAS	Class Clostridia	rs1539567	G	A	0.514454	-0.0545029	0.874393	FALSE	127479887	0.0288244	0.152394	4.95738e-06	0.110171	TRUE
ROSACEANAS	Class Clostridia	rs12884121	C	A	-0.566749	0.0219709	0.232946	FALSE	70002137	0.0341805	0.119822	2.86314e-06	0.118291	TRUE
ROSACEANAS	Class Clostridia	rs2560691	A	G	0.523757	0.00988458	0.240139	FALSE	116018886	0.0373574	0.119244	1.76891e-07	0.0974374	TRUE
ROSACEANAS	Class Clostridia	rs62275583	T	C	0.708947	0.0721123	0.125681	FALSE	153201322	0.00259035	0.0408769	2.28e-06	0.1471	TRUE
ROSACEANAS	Class Deltaproteobacteria	rs9841962	A	G	-0.584705	-0.0603952	0.151007	FALSE	161912214	0.00378697	0.0381722	1.28e-06	0.118361	TRUE
ROSACEANAS	Class Deltaproteobacteria	rs6470758	C	A	0.540701	-0.0506723	0.883827	FALSE	129678850	0.00785183	0.0427192	7.16e-06	0.118416	TRUE
ROSACEANAS	Class Deltaproteobacteria	rs935830	G	A	0.52897	0.0287283	0.784111	FALSE	1195239	0.0128369	0.0330771	1.63e-06	0.10817	TRUE
ROSACEANAS	Class Deltaproteobacteria	rs73167292	T	C	-0.735244	-0.0227462	0.0940997	FALSE	172371155	0.0208809	0.0467296	1.15e-06	0.148199	TRUE
ROSACEANAS	Class Deltaproteobacteria	rs55902701	A	G	-0.732185	0.00384195	0.0908722	FALSE	11575128	0.0311867	0.0475492	8.21e-06	0.161425	TRUE
ROSACEANAS	Class Deltaproteobacteria	rs55902701	A	G	-0.732185	-0.320711	0.0908732	FALSE	11575128	0.00294693	0.179305	8.21425e-06	0.161425	TRUE
ROSACEANAS	Class Deltaproteobacteria	rs9841962	A	G	-0.584705	-0.163676	0.151243	FALSE	161912214	0.010121	0.143195	1.27809e-06	0.118361	TRUE
ROSACEANAS	Class Deltaproteobacteria	rs73167292	T	C	-0.735244	0.166223	0.0941047	FALSE	172371155	0.0136642	0.174788	1.15183e-06	0.148199	TRUE
ROSACEANAS	Class Deltaproteobacteria	rs935830	G	A	0.52897	0.0795916	0.784397	FALSE	1195239	0.0208742	0.124268	1.63028e-06	0.10817	TRUE
ROSACEANAS	Class Deltaproteobacteria	rs6470758	C	A	0.540701	0.0719264	0.883987	FALSE	129678850	0.0261966	0.160928	7.15958e-06	0.118416	TRUE
ROSACEANAS	Class Deltaproteobacteria	rs62275583	T	C	0.708947	-0.020469	0.125682	FALSE	153201322	0.0357362	0.152758	2.27655e-06	0.1471	TRUE
ROSACEANAS	Class Deltaproteobacteria	rs7224751	T	G	0.57462	-0.146648	0.400421	FALSE	14556962	0.00776784	0.0550894	1.44878e-06	0.114377	TRUE
ROSACEANAS	Order Clostridiales	rs9288569	G	C	0.604756	0.0690322	0.265046	FALSE	221506400	0.0256301	0.0309315	7.57747e-06	0.130275	TRUE
ROSACEANAS	Order Clostridiales	rs9288569	G	C	0.604756	0.301509	0.264926	FALSE	221506400	0.0143496	0.123146	7.57747e-06	0.130275	TRUE
ROSACEANAS	Order Clostridiales	rs17311616	T	A	-0.64389	0.0997498	0.237458	FALSE	164520984	0.00156282	0.0315389	6.87078e-06	0.138017	TRUE
ROSACEANAS	Order Clostridiales	rs7224751	T	G	0.57462	0.183759	0.40057	FALSE	14556962	0.0100547	0.0713921	1.44878e-06	0.114377	TRUE
ROSACEANAS	Order Clostridiales	rs62311052	A	G	-0.569758	-0.16539	0.273875	FALSE	130137857	0.0348972	0.0784005	2.19764e-06	0.115579	TRUE
ROSACEANAS	Order Clostridiales	rs62311052	A	G	-0.569758	0.0430928	0.274029	FALSE	130137857	0.0417927	0.0211699	2.19764e-06	0.115579	TRUE
ROSACEANAS	Order Clostridiales	rs17311616	T	A	-0.64389	0.0557335	0.237454	FALSE	164520984	0.0284394	0.0254356	6.87078e-06	0.138017	TRUE
ROSACEANAS	Order Clostridiales	rs1450546	G	A	-0.512316	-0.0771921	0.349178	FALSE	44808757	0.016539	0.0322063	6.46575e-06	0.109478	TRUE
ROSACEANAS	Order Clostridiales	rs9288569	G	C	0.604756	-0.0172958	0.265005	FALSE	221506400	0.0410856	0.00846729	7.57747e-06	0.130275	TRUE
ROSACEANAS	Order Clostridiales	rs1450546	G	A	-0.512316	-0.176734	0.349247	FALSE	44808757	0.0177848	0.0745694	6.46575e-06	0.109478	TRUE
ROSACEANAS	Order Clostridiales	rs17311616	T	A	-0.64389	0.228676	0.237352	FALSE	164520984	0.0104222	0.0892744	6.87078e-06	0.138017	TRUE
ROSACEANAS	Order Desulfovibrionales	rs12937017	A	G	-0.537314	-0.230624	0.623472	FALSE	68688483	0.0332422	0.108317	3.75293e-06	0.111784	TRUE
ROSACEANAS	Order Desulfovibrionales	rs7224751	T	G	0.57462	-0.0271786	0.400413	FALSE	14556962	0.000751865	0.0152746	1.44878e-06	0.114377	TRUE
ROSACEANAS	Order Desulfovibrionales	rs62311052	A	G	-0.569758	-0.0224629	0.274067	FALSE	130137857	0.00179605	0.0167387	2.19764e-06	0.115579	TRUE
ROSACEANAS	Order Desulfovibrionales	rs1450546	G	A	-0.512316	0.0149188	0.348876	FALSE	44808757	0.00343099	0.0157362	6.46575e-06	0.109478	TRUE
ROSACEANAS	Order Desulfovibrionales	rs9288569	G	C	0.604756	-0.00781919	0.265008	FALSE	221506400	0.00644714	0.016957	7.57747e-06	0.130275	TRUE
ROSACEANAS	Order Desulfovibrionales	rs12937017	A	G	-0.537314	-0.00690385	0.623449	FALSE	68688483	0.00654472	0.0154256	3.75293e-06	0.111784	TRUE
ROSACEANAS	Order Desulfovibrionales	rs17311616	T	A	-0.64389	-0.00205361	0.237403	FALSE	164520984	0.00906829	0.0175465	6.87078e-06	0.138017	TRUE
ROSACEANAS	Order Desulfovibrionales	rs12937017	A	G	-0.537314	0.0135506	0.623832	FALSE	68688483	0.00492768	0.0116898	3.75293e-06	0.111784	TRUE
ROSACEANAS	Order Desulfovibrionales	rs62311052	A	G	-0.569758	0.00747963	0.273392	FALSE	130137857	0.0111225	0.0127074	2.19764e-06	0.115579	TRUE
ROSACEANAS	Order Desulfovibrionales	rs9288569	G	C	0.604756	-0.00637257	0.265519	FALSE	221506400	0.0124004	0.0128526	7.57747e-06	0.130275	TRUE
ROSACEANAS	Order Desulfovibrionales	rs7224751	T	G	0.57462	-0.00450596	0.400366	FALSE	14556962	0.0139372	0.0115666	1.44878e-06	0.114377	TRUE
ROSACEANAS	Order Pasteurellales	rs1450546	G	A	-0.512316	-0.00270758	0.349067	FALSE	44808757	0.0164021	0.0119063	6.46575e-06	0.109478	TRUE
ROSACEANAS	Order Pasteurellales	rs17311616	T	A	-0.64389	0.000547992	0.237055	FALSE	164520984	0.0193424	0.0132946	6.87078e-06	0.138017	TRUE
ROSACEANAS	Order Pasteurellales	rs1450546	G	A	-0.512316	-0.0655819	0.348957	FALSE	44808757	0.00043129	0.0275403	6.46575e-06	0.109478	TRUE
ROSACEANAS	Order Pasteurellales	rs12937017	A	G	-0.537314	-0.0303239	0.623577	FALSE	68688483	0.00653645	0.0270037	3.75293e-06	0.111784	TRUE
ROSACEANAS	Order Pasteurellales	rs9288569	G	C	0.604756	-0.026648	0.265627	FALSE	221506400	0.00925775	0.0297446	7.57747e-06	0.130275	TRUE
ROSACEANAS	Order Pasteurellales	rs7224751	T	G	0.57462	-0.0149598	0.40035	FALSE	14556962	0.0143962	0.0267398	1.44878e-06	0.114377	TRUE
ROSACEANAS	Order Pasteurellales	rs62311052	A	G	-0.569758	-0.015593	0.27323	FALSE	130137857	0.0148809	0.0293507	2.19764e-06	0.115579	TRUE
ROSACEANAS	Order Pasteurellales	rs17311616	T	A	-0.64389	0.0108929	0.237028	FALSE	164520984	0.018078	0.0307456	6.87078e-06	0.138017	TRUE
ROSACEANAS	Order Pasteurellales	rs1450546	G	A	-0.512316	0.0342936	0.3492	FALSE	44808757	0.00683037	0.0270522	6.46575e-06	0.109478	TRUE
ROSACEANAS	Order Pasteurellales	rs7224751	T	G	0.57462	-0.0261841	0.400333	FALSE	14556962	0.0106238	0.0262602	1.44878e-06	0.114377	TRUE
ROSACEANAS	Order Pasteurellales	rs12937017	A	G	-0.537314	-0.0153706	0.623615	FALSE	68688483	0.01876	0.0265612	3.75293e-06	0.111784	TRUE
ROSACEANAS	Order Pasteurellales	rs62311052	A	G	-0.569758	-0.0142652	0.273261	FALSE	130137857	0.0206663	0.0287683	2.19764e-06	0.115579	TRUE
ROSACEANAS	Order Pasteurellales	rs9288569	G	C	0.604756	-0.00881369	0.265646	FALSE	221506400	0.025439	0.0292503	7.57747e-06	0.130275	TRUE
ROSACEANAS	Family Pasteurellaceae	rs17311616	T	A	-0.64389	-0.00572613	0.237008	FALSE	164520984	0.0283067	0.0301159	6.87078e-06	0.138017	TRUE
ROSACEANAS	Family Pasteurellaceae	rs74499983	G	C	1.0168	0.123665	0.060751	FALSE	28959401	0.0010148	0.0571394	7.81e-06	0.220258	TRUE
ROSACEANAS	Family Pasteurellaceae	rs11067674	T	G	1.13928	0.0490669	0.126291	FALSE	115605763	0.0077086	0.0409872	7.34e-06	0.246003	TRUE
ROSACEANAS	Family Pasteurellaceae	rs12195413	A	G	0.839351	0.042193	0.0853259	FALSE	148225929	0.0130198	0.0491449	7.47e-06	0.181404	TRUE
ROSACEANAS	Family Pasteurellaceae	rs73053986	G	T	0.572457	0.0203572	0.386286	FALSE	55748084	0.0155036	0.0278689	2.6e-07	0.106539	TRUE
ROSACEANAS	Family Pasteurellaceae	rs472420	A	G	-0.76092	-0.00480126	0.887412	FALSE	130216443	0.0303833	0.0431974	1.71e-06	0.153312	TRUE
ROSACEANAS	Family Pasteurellaceae	rs73053986	G	T	0.572457	0.194386	0.387221	FALSE	55748084	0.0024602	0.103958	2.59914e-07	0.106539	TRUE
ROSACEANAS	Family Pasteurellaceae	rs11067674	T	G	1.13928	0.105383	0.126418	FALSE	115605763	0.019755	0.154033	7.33666e-06	0.246003	TRUE
ROSACEANAS	Family Pasteurellaceae	rs12195413	A	G	0.839351	0.0742927	0.0853385	FALSE	148225929	0.0273985	0.183122	7.46868e-06	0.181404	TRUE
ROSACEANAS	Family Pasteurellaceae	rs74499983	G	C	1.0168	-0.0605606	0.0606741	FALSE	28959401	0.0310859	0.213968	7.8132e-06	0.220258	TRUE
ROSACEANAS	Family Pasteurellaceae	rs472420	A	G	-0.76092	0.0372766	0.887529	FALSE	130216443	0.0326744	0.160961	1.71473e-06	0.153312	TRUE
ROSACEANAS	Family Pasteurellaceae	rs6420260	G	A	0.45431	-0.0648852	0.603848	FALSE	87813622	0.000675973	0.0279539	2.96e-06	0.094908	TRUE
ROSACEANAS	Family Pasteurellaceae	rs853548	G	A	0.793204	0.0796997	0.0681666	FALSE	110553560	0.0047006	0.0541435	2.63e-06	0.164651	TRUE
ROSACEANAS	Genus Anaerofilum	rs4957852	T	C	0.473854	0.0195116	0.53455	FALSE	110074036	0.0158155	0.02728	7.09e-08	0.0851798	TRUE
ROSACEANAS	Genus Anaerofilum	rs1114630	G	A	-0.442892	0.020066	0.333951	FALSE	133375715	0.016216	0.0288339	5.18e-06	0.0949873	TRUE
ROSACEANAS	Genus Anaerofilum	rs57264694	T	G	0.551946	0.0140427	0.201007	FALSE	77922529	0.0226637	0.0340362	8.58e-06	0.12122	TRUE
ROSACEANAS	Genus Anaerofilum	rs12134662	G	A	0.432082	0.00708614	0.409596	FALSE	17398271	0.0265731	0.0275745	8.01e-06	0.0946238	TRUE
ROSACEANAS	Genus Anaerofilum	rs10461323	T	C	0.564912	0.00365651	0.170351	FALSE	182484047	0.0306396	0.03604	4.99e-06	0.120784	TRUE
ROSACEANAS	Genus Anaerofilum	rs6420260	G	A	0.45431	0.112697	0.604084	FALSE	87813622	0.0112066	0.104354	2.9638e-06	0.094908	TRUE
ROSACEANAS	Genus Anaerofilum	rs10461323	T	C	0.564912	0.132672	0.170478	FALSE	182484047	0.0128561	0.133799	4.98633e-06	0.120784	TRUE
ROSACEANAS	Genus Anaerofilum	rs1114630	G	A	-0.442892	-0.0951714	0.333669	FALSE	133375715	0.0150926	0.1078	5.18348e-06	0.0949873	TRUE
ROSACEANAS	Genus Anaerofilum	rs4957852	T	C	0.473854	0.078823	0.534352	FALSE	110074036	0.0175928	0.102036	7.08707e-08	0.0851798	TRUE
ROSACEANAS	Genus Anaerofilum	rs853548	G	A	0.793204	0.155755	0.0678129	FALSE	110553560	0.0176942	0.202747	2.62578e-06	0.164651	TRUE
ROSACEANAS	Genus Dialister	rs12134662	G	A	0.432082	-0.0420741	0.409947	FALSE	17398271	0.027349	0.103279	8.01055e-06	0.0946238	TRUE
ROSACEANAS	Genus Dialister	rs57264694	T	G	0.551946	-0.0322755	0.200502	FALSE	77922529	0.0319745	0.126983	8.58106e-06	0.12122	TRUE
ROSACEANAS	Genus Dialister	rs1350519	A	G	0.644135	0.0550933	0.26588	FALSE	75187221	0.00244247	0.0307591	7.23e-06	0.138013	TRUE
ROSACEANAS	Genus Dialister	rs58092190	T	C	0.816789	0.085392	0.0862447	FALSE	26860278	0.00267682	0.0488254	9.91e-06	0.177887	TRUE
ROSACEANAS	Genus Dialister	rs4614053	T	C	0.546075	-0.0431043	0.546591	FALSE	8726343	0.0038255	0.0273309	2.12e-06	0.110212	TRUE
ROSACEANAS	Genus Dialister	rs9490285	C	T	-0.77701	-0.0411417	0.117086	FALSE	121470947	0.0111666	0.0426739	6.62e-06	0.165738	TRUE
ROSACEANAS	Genus Dialister	rs11742607	G	A	0.593827	-0.0304271	0.213057	FALSE	173539048	0.0120075	0.033256	7.02e-06	0.127046	TRUE
ROSACEANAS	Genus Dialister	rs11643968	A	G	0.666472	-0.0187671	0.287231	FALSE	84258409	0.0177517	0.0300699	6.63e-06	0.142171	TRUE
ROSACEANAS	Genus Dialister	rs7605658	T	C	0.577245	0.0168775	0.431261	FALSE	45183783	0.0180541	0.0276516	1.08e-06	0.113037	TRUE
ROSACEANAS	Genus Dialister	rs6842379	C	T	-0.534112	-0.0159957	0.426231	FALSE	79685589	0.0187483	0.0276166	1.68e-06	0.106652	TRUE
ROSACEANAS	Genus Dialister	rs75794610	A	C	1.14969	-0.0280075	0.0430059	FALSE	12087576	0.0224945	0.0667603	1.82e-06	0.230452	TRUE
ROSACEANAS	Genus Odoribacter	rs28794896	A	G	1.16864	-0.00321651	0.0542429	FALSE	3144150	0.0319098	0.0600639	8.2e-06	0.252015	TRUE
ROSACEANAS	Genus Odoribacter	rs11643968	A	G	0.666472	-0.246725	0.287226	FALSE	84258409	0.00112865	0.112441	6.6302e-06	0.142171	TRUE
ROSACEANAS	Genus Odoribacter	rs7605658	T	C	0.577245	0.116811	0.432048	FALSE	45183783	0.010268	0.102988	1.08474e-06	0.113037	TRUE
ROSACEANAS	Genus Odoribacter	rs1350519	A	G	0.644135	0.121728	0.265124	FALSE	75187221	0.0116164	0.11514	7.22974e-06	0.138013	TRUE
ROSACEANAS	Genus Odoribacter	rs75794610	A	C	1.14969	-0.182737	0.0429691	FALSE	12087576	0.0185168	0.248944	1.82285e-06	0.230452	TRUE
ROSACEANAS	Genus Odoribacter	rs58092190	T	C	0.816789	0.113431	0.0865687	FALSE	26860278	0.021436	0.183242	9.9072e-06	0.177887	TRUE
ROSACEANAS	Genus Odoribacter	rs9490285	C	T	-0.77701	-0.0585686	0.116753	FALSE	121470947	0.0284777	0.158616	6.62032e-06	0.165738	TRUE
ROSACEANAS	Genus Ruminococcus2	rs4614053	T	C	0.546075	0.0261089	0.547478	FALSE	8726343	0.0319453	0.10234	2.11522e-06	0.110212	TRUE
ROSACEANAS	Genus Ruminococcus2	rs11742607	G	A	0.593827	-0.029947	0.213121	FALSE	173539048	0.0323849	0.124307	7.02367e-06	0.127046	TRUE
ROSACEANAS	Genus Ruminococcus2	rs28794896	A	G	1.16864	0.0391525	0.0540786	FALSE	3144150	0.0344566	0.224275	8.1964e-06	0.252015	TRUE
ROSACEANAS	Genus Ruminococcus2	rs6842379	C	T	-0.534112	0.0143747	0.426748	FALSE	79685589	0.0355784	0.103424	1.67653e-06	0.106652	TRUE
ROSACEANAS	Genus Ruminococcus2	rs595298	A	G	0.559108	-0.0487856	0.481918	FALSE	56426075	0.00258553	0.0276408	2.62e-06	0.113696	TRUE
ROSACEANAS	Genus Ruminococcus2	rs2247548	C	T	0.955936	-0.0968034	0.0557899	FALSE	14792118	0.003382	0.0591051	7.92e-06	0.205333	TRUE
ROSACEANAS	Genus Ruminococcus2	rs2069316	C	T	0.694598	-0.0328485	0.154267	FALSE	15992084	0.0128378	0.0378232	2.43e-06	0.140772	TRUE
ROSACEANAS	Genus Ruminococcus2	rs56306538	G	A	0.820081	-0.0175854	0.185223	FALSE	30891038	0.0204761	0.0348939	8.14e-07	0.15817	TRUE
ROSACEANAS	Genus Ruminococcus2	rs3922915	A	G	1.03855	-0.0193738	0.085338	FALSE	182618634	0.0231398	0.0492755	9.68e-07	0.201832	TRUE
ROSACEANAS	Genus Ruminococcus2	rs2472614	C	G	1.08025	0.0100646	0.213882	FALSE	5437730	0.0253728	0.0331154	4.68e-08	0.18602	TRUE
ROSACEANAS	Genus Ruminococcus2	rs4897026	A	G	-0.547758	0.00328986	0.226952	FALSE	148646409	0.0306426	0.0324621	9.72e-06	0.118925	TRUE
ROSACEANAS	Genus Ruminococcus2	rs56306538	G	A	0.820081	0.311987	0.186578	FALSE	30891038	0.000287078	0.116044	8.13682e-07	0.15817	TRUE
ROSACEANAS	Genus Ruminococcus2	rs595298	A	G	0.559108	0.0678778	0.481974	FALSE	56426075	0.0203882	0.102955	2.61549e-06	0.113696	TRUE
ROSACEANAS	Genus Ruminococcus2	rs4897026	A	G	-0.547758	0.0802884	0.226889	FALSE	148646409	0.0204631	0.122319	9.72101e-06	0.118925	TRUE
ROSACEANAS	Genus Ruminococcus2	rs3922915	A	G	1.03855	-0.118594	0.0851511	FALSE	182618634	0.0207765	0.184081	9.67839e-07	0.201832	TRUE
ROSACEANAS	Genus Slackia	rs2069316	C	T	0.694598	0.0687564	0.154298	FALSE	15992084	0.0250564	0.141245	2.43465e-06	0.140772	TRUE
ROSACEANAS	Genus Slackia	rs2247548	C	T	0.955936	0.0219604	0.0559141	FALSE	14792118	0.0368489	0.222061	7.91609e-06	0.205333	TRUE
ROSACEANAS	Genus Slackia	rs2472614	C	G	1.08025	0.00847031	0.214732	FALSE	5437730	0.0378078	0.12322	4.67929e-08	0.18602	TRUE
ROSACEANAS	Genus Slackia	rs8076809	C	A	0.725525	-0.057957	0.246204	FALSE	64103948	0.00221095	0.0315636	7.32e-06	0.154156	TRUE
ROSACEANAS	Genus Slackia	rs2877111	A	G	1.06288	0.115429	0.0374178	FALSE	30033665	0.00389673	0.0736195	4.88e-06	0.221202	TRUE
ROSACEANAS	Genus Slackia	rs1149713	C	T	0.571259	-0.0355906	0.462812	FALSE	75286982	0.00638597	0.0272532	3.69e-06	0.117242	TRUE
RHINOPHYMA	Class Actinobacteria	rs10802996	G	C	0.811352	-0.0341439	0.30095	FALSE	241847325	0.00847083	0.0299406	1.16e-07	0.143149	TRUE
RHINOPHYMA	Class Actinobacteria	rs13275925	A	G	-0.613779	0.0225529	0.352913	FALSE	140184158	0.0143185	0.0285497	5.78e-06	0.128835	TRUE
RHINOPHYMA	Class Actinobacteria	rs13244141	T	C	1.16297	0.0388268	0.0726179	FALSE	97375949	0.0154286	0.0528867	4.26e-06	0.240393	TRUE
RHINOPHYMA	Class Actinobacteria	rs2116081	C	T	0.627361	-0.0192036	0.542412	FALSE	124685432	0.0160863	0.02735	3.6e-06	0.1286	TRUE
RHINOPHYMA	Class Actinobacteria	rs2514141	T	A	0.724427	0.0225584	0.159522	FALSE	87865366	0.0182021	0.0373688	4.19e-06	0.149614	TRUE
RHINOPHYMA	Class Actinobacteria	rs9790437	G	A	0.64056	-0.0187247	0.760399	FALSE	55764925	0.0186656	0.032124	3.67e-06	0.131424	TRUE
RHINOPHYMA	Class Actinobacteria	rs62425173	C	A	1.12881	0.0221883	0.131537	FALSE	116364138	0.0193532	0.040159	2.92e-06	0.229042	TRUE
RHINOPHYMA	Class Actinobacteria	rs8076809	C	A	0.725525	0.189766	0.246326	FALSE	64103948	0.00430132	0.117912	7.32277e-06	0.154156	TRUE
RHINOPHYMA	Class Actinobacteria	rs1149713	C	T	0.571259	-0.151474	0.461948	FALSE	75286982	0.00545596	0.101706	3.69019e-06	0.117242	TRUE
RHINOPHYMA	Class Actinobacteria	rs2116081	C	T	0.627361	0.146975	0.542662	FALSE	124685432	0.00602748	0.102271	3.60049e-06	0.1286	TRUE
RHINOPHYMA	Class Actinobacteria	rs10802996	G	C	0.811352	0.0940987	0.300172	FALSE	241847325	0.0160776	0.112268	1.15756e-07	0.143149	TRUE
RHINOPHYMA	Class Actinobacteria	rs13244141	T	C	1.16297	0.155974	0.0727766	FALSE	97375949	0.0169676	0.195169	4.26331e-06	0.240393	TRUE
RHINOPHYMA	Class Actinobacteria	rs2514141	T	A	0.724427	-0.0720466	0.158943	FALSE	87865366	0.024287	0.140138	4.18946e-06	0.149614	TRUE
RHINOPHYMA	Class Actinobacteria	rs62425173	C	A	1.12881	-0.0656197	0.131665	FALSE	116364138	0.0264742	0.150038	2.92077e-06	0.229042	TRUE
RHINOPHYMA	Class Actinobacteria	rs2877111	A	G	1.06288	0.0957991	0.0370357	FALSE	30033665	0.0290474	0.273552	4.88256e-06	0.221202	TRUE
RHINOPHYMA	Class Actinobacteria	rs9790437	G	A	0.64056	0.0416212	0.760651	FALSE	55764925	0.0291468	0.119981	3.66705e-06	0.131424	TRUE
RHINOPHYMA	Class Actinobacteria	rs13275925	A	G	-0.613779	-0.0350835	0.352979	FALSE	140184158	0.0297204	0.107004	5.78152e-06	0.128835	TRUE
RHINOPHYMA	Class Actinobacteria	rs72653729	A	G	0.418859	-0.12214	0.205677	FALSE	12211736	0.0346649	0.0578246	9.1195e-06	0.0927028	TRUE
RHINOPHYMA	Class Actinobacteria	rs10263016	G	T	0.762323	-0.123239	0.0516273	FALSE	51641608	0.0463319	0.0618556	3.58501e-06	0.161335	TRUE
RHINOPHYMA	Class Actinobacteria	rs497127	G	A	-0.760939	0.141333	0.952408	FALSE	135655530	0.0499034	0.0720796	2.55642e-06	0.158483	TRUE
RHINOPHYMA	Order Bifidobacteriales	rs7713567	T	C	0.409742	-0.0692072	0.310276	FALSE	151051394	0.0203198	0.0298257	3.89001e-06	0.0870456	TRUE
RHINOPHYMA	Order Bifidobacteriales	rs497127	G	A	-0.760939	0.137067	0.952385	FALSE	135655530	0.0354781	0.0651812	2.55642e-06	0.158483	TRUE
RHINOPHYMA	Order Bifidobacteriales	rs10770215	T	C	-0.368536	0.0359676	0.425873	FALSE	17309693	0.0163422	0.0149791	8.01816e-06	0.0810633	TRUE
RHINOPHYMA	Order Bifidobacteriales	rs4777391	A	C	0.38763	-0.0388004	0.485197	FALSE	71450067	0.0110288	0.015265	6.60546e-06	0.0844541	TRUE
RHINOPHYMA	Order Bifidobacteriales	rs497127	G	A	-0.760939	0.52964	0.952479	FALSE	135655530	0.00486004	0.188071	2.55642e-06	0.158483	TRUE
RHINOPHYMA	Order Bifidobacteriales	rs7713567	T	C	0.409742	0.1943	0.310196	FALSE	151051394	0.010427	0.0758589	3.89001e-06	0.0870456	TRUE
RHINOPHYMA	Order Bifidobacteriales	rs497127	G	A	-0.760939	0.0981805	0.952539	FALSE	135655530	0.0285647	0.0448426	2.55642e-06	0.158483	TRUE
RHINOPHYMA	Order Bifidobacteriales	rs4777391	A	C	0.38763	-0.0268128	0.485283	FALSE	71450067	0.034393	0.0126748	6.60546e-06	0.0844541	TRUE
RHINOPHYMA	Order Bifidobacteriales	rs4777391	A	C	0.38763	-0.0829071	0.485385	FALSE	71450067	0.00673209	0.0305952	6.60546e-06	0.0844541	TRUE
RHINOPHYMA	Order Bifidobacteriales	rs4777391	A	C	0.38763	-0.015834	0.485197	FALSE	71450067	0.0346226	0.00749452	6.60546e-06	0.0844541	TRUE
RHINOPHYMA	Order Bifidobacteriales	rs78378379	C	T	0.819168	0.505264	0.028062	FALSE	74612078	0.0138029	0.205196	4.54161e-06	0.175282	TRUE
RHINOPHYMA	Order Bifidobacteriales	rs4777391	A	C	0.38763	0.141952	0.485552	FALSE	71450067	0.0451804	0.0708705	6.60546e-06	0.0844541	TRUE
RHINOPHYMA	Order Bifidobacteriales	rs497127	G	A	-0.760939	0.429272	0.952349	FALSE	135655530	0.0263572	0.193287	2.55642e-06	0.158483	TRUE
RHINOPHYMA	Order Bifidobacteriales	rs7713567	T	C	0.409742	-0.0840463	0.310064	FALSE	151051394	0.00123058	0.0260069	3.89001e-06	0.0870456	TRUE
RHINOPHYMA	Order Bifidobacteriales	rs66587425	C	T	0.533695	0.0883125	0.118872	FALSE	95300700	0.0486217	0.0447857	8.71449e-06	0.117747	TRUE
RHINOPHYMA	Order Bifidobacteriales	rs4777391	A	C	0.38763	-0.0250254	0.485197	FALSE	71450067	0.0475368	0.0126296	6.60546e-06	0.0844541	TRUE
RHINOPHYMA	Order Bifidobacteriales	rs72742321	T	C	0.514189	-0.201722	0.110371	FALSE	50771511	0.0498425	0.102851	7.27061e-06	0.112534	TRUE
RHINOPHYMA	Order Bifidobacteriales	rs4777391	A	C	0.38763	-0.0311201	0.485227	FALSE	71450067	0.0379971	0.0149985	6.60546e-06	0.0844541	TRUE
RHINOPHYMA	Order Bifidobacteriales	rs1711787	G	A	-0.856205	-0.0470119	0.957743	FALSE	59543873	0.00208589	0.0373865	7.20858e-06	0.187344	TRUE
RHINOPHYMA	Order Bifidobacteriales	rs497127	G	A	-0.760939	0.0397378	0.952478	FALSE	135655530	0.00259404	0.0352347	2.55642e-06	0.158483	TRUE
RHINOPHYMA	Family Bifidobacteriaceae	rs78378379	C	T	0.819168	-0.0416945	0.0279855	FALSE	74612078	0.00359647	0.0455162	4.54161e-06	0.175282	TRUE
RHINOPHYMA	Family Bifidobacteriaceae	rs10263016	G	T	0.762323	0.0250419	0.0516312	FALSE	51641608	0.00459525	0.0338574	3.58501e-06	0.161335	TRUE
RHINOPHYMA	Family Bifidobacteriaceae	rs10770215	T	C	-0.368536	0.0099162	0.425872	FALSE	17309693	0.00511696	0.0151116	8.01816e-06	0.0810633	TRUE
RHINOPHYMA	Family Bifidobacteriaceae	rs72653729	A	G	0.418859	0.0112846	0.205808	FALSE	12211736	0.00542239	0.0185166	9.1195e-06	0.0927028	TRUE
RHINOPHYMA	Family Bifidobacteriaceae	rs7713567	T	C	0.409742	-0.00922731	0.310199	FALSE	151051394	0.00569288	0.0162138	3.89001e-06	0.0870456	TRUE
RHINOPHYMA	Family Bifidobacteriaceae	rs752821	A	G	0.425936	0.00926635	0.240241	FALSE	149509433	0.00596262	0.0174908	7.97444e-06	0.0936576	TRUE
RHINOPHYMA	Family Bifidobacteriaceae	rs66587425	C	T	0.533695	-0.00885211	0.118965	FALSE	95300700	0.00702601	0.0231845	8.71449e-06	0.117747	TRUE
RHINOPHYMA	Family Bifidobacteriaceae	rs72742321	T	C	0.514189	-0.00855217	0.110367	FALSE	50771511	0.00721154	0.0239612	7.27061e-06	0.112534	TRUE
RHINOPHYMA	Family Bifidobacteriaceae	rs72742321	T	C	0.514189	0.0537284	0.110521	FALSE	50771511	5.78642e-05	0.0180366	7.27061e-06	0.112534	TRUE
RHINOPHYMA	Family Bifidobacteriaceae	rs497127	G	A	-0.760939	0.0691671	0.9526	FALSE	135655530	0.000201108	0.0268723	2.55642e-06	0.158483	TRUE
RHINOPHYMA	Family Bifidobacteriaceae	rs10770215	T	C	-0.368536	0.0237637	0.425174	FALSE	17309693	0.000755126	0.0114386	8.01816e-06	0.0810633	TRUE
RHINOPHYMA	Family Bifidobacteriaceae	rs10263016	G	T	0.762323	0.0341573	0.0514832	FALSE	51641608	0.00359166	0.0254518	3.58501e-06	0.161335	TRUE
RHINOPHYMA	Family Bifidobacteriaceae	rs66587425	C	T	0.533695	-0.0234912	0.11896	FALSE	95300700	0.00368098	0.0176839	8.71449e-06	0.117747	TRUE
RHINOPHYMA	Family Bifidobacteriaceae	rs7713567	T	C	0.409742	0.0152572	0.309873	FALSE	151051394	0.00430266	0.0123085	3.89001e-06	0.0870456	TRUE
RHINOPHYMA	Family Bifidobacteriaceae	rs752821	A	G	0.425936	0.00959062	0.240495	FALSE	149509433	0.00938194	0.0132476	7.97444e-06	0.0936576	TRUE
RHINOPHYMA	Family Bifidobacteriaceae	rs1711787	G	A	-0.856205	-0.0200421	0.957909	FALSE	59543873	0.00953872	0.0281791	7.20858e-06	0.187344	TRUE
RHINOPHYMA	Family Bifidobacteriaceae	rs78378379	C	T	0.819168	-0.0151477	0.0278006	FALSE	74612078	0.0131476	0.0341524	4.54161e-06	0.175282	TRUE
RHINOPHYMA	Family Bifidobacteriaceae	rs4777391	A	C	0.38763	0.00486852	0.485458	FALSE	71450067	0.0133648	0.0113601	6.60546e-06	0.0844541	TRUE
RHINOPHYMA	Family Bifidobacteriaceae	rs72653729	A	G	0.418859	-0.00193904	0.205756	FALSE	12211736	0.0178045	0.0140492	9.1195e-06	0.0927028	TRUE
RHINOPHYMA	Family Bifidobacteriaceae	rs10770215	T	C	-0.368536	0.0514714	0.424972	FALSE	17309693	0.00130879	0.0265284	8.01816e-06	0.0810633	TRUE
RHINOPHYMA	Genus Bifidobacterium	rs72742321	T	C	0.514189	0.0624244	0.1104	FALSE	50771511	0.00350505	0.0423205	7.27061e-06	0.112534	TRUE
RHINOPHYMA	Genus Bifidobacterium	rs7713567	T	C	0.409742	-0.0395097	0.309584	FALSE	151051394	0.00412532	0.0284569	3.89001e-06	0.0870456	TRUE
RHINOPHYMA	Genus Bifidobacterium	rs66587425	C	T	0.533695	-0.0370379	0.119121	FALSE	95300700	0.00912945	0.0409013	8.71449e-06	0.117747	TRUE
RHINOPHYMA	Genus Bifidobacterium	rs752821	A	G	0.425936	0.0276099	0.24043	FALSE	149509433	0.00920683	0.0306874	7.97444e-06	0.0936576	TRUE
RHINOPHYMA	Genus Bifidobacterium	rs10263016	G	T	0.762323	0.0300373	0.0513469	FALSE	51641608	0.0152164	0.0586672	3.58501e-06	0.161335	TRUE
RHINOPHYMA	Genus Bifidobacterium	rs72653729	A	G	0.418859	0.0146456	0.205799	FALSE	12211736	0.0163117	0.0325215	9.1195e-06	0.0927028	TRUE
RHINOPHYMA	Genus Bifidobacterium	rs497127	G	A	-0.760939	0.0264455	0.952406	FALSE	135655530	0.01672	0.0618178	2.55642e-06	0.158483	TRUE
RHINOPHYMA	Genus Bifidobacterium	rs78378379	C	T	0.819168	-0.0297769	0.0277621	FALSE	74612078	0.0175863	0.0782235	4.54161e-06	0.175282	TRUE
RHINOPHYMA	Genus Bifidobacterium	rs1711787	G	A	-0.856205	-0.0223377	0.957978	FALSE	59543873	0.0182898	0.0651224	7.20858e-06	0.187344	TRUE
RHINOPHYMA	Genus Bifidobacterium	rs4777391	A	C	0.38763	-0.00586423	0.485369	FALSE	71450067	0.0205848	0.0262752	6.60546e-06	0.0844541	TRUE
RHINOPHYMA	Genus Bifidobacterium	rs10770215	T	C	-0.368536	0.079827	0.425054	FALSE	17309693	6.63053e-05	0.0258186	8.01816e-06	0.0810633	TRUE
RHINOPHYMA	Genus Bifidobacterium	rs72742321	T	C	0.514189	0.110993	0.110452	FALSE	50771511	0.000203128	0.0404685	7.27061e-06	0.112534	TRUE
RHINOPHYMA	Genus Bifidobacterium	rs66587425	C	T	0.533695	-0.0765765	0.119083	FALSE	95300700	0.00188386	0.0401546	8.71449e-06	0.117747	TRUE
RHINOPHYMA	Genus Bifidobacterium	rs497127	G	A	-0.760939	0.0969632	0.95244	FALSE	135655530	0.0036588	0.0606302	2.55642e-06	0.158483	TRUE
RHINOPHYMA	Genus Bifidobacterium	rs7713567	T	C	0.409742	0.0436615	0.309769	FALSE	151051394	0.0039618	0.0279953	3.89001e-06	0.0870456	TRUE
RHINOPHYMA	Genus Bifidobacterium	rs72653729	A	G	0.418859	-0.0478704	0.205699	FALSE	12211736	0.00447287	0.0319606	9.1195e-06	0.0927028	TRUE
RHINOPHYMA	Genus Bifidobacterium	rs78378379	C	T	0.819168	-0.100377	0.0277392	FALSE	74612078	0.00647607	0.0773314	4.54161e-06	0.175282	TRUE
RHINOPHYMA	Genus Bifidobacterium	rs752821	A	G	0.425936	0.0225368	0.240415	FALSE	149509433	0.0151348	0.0301017	7.97444e-06	0.0936576	TRUE
RHINOPHYMA	Genus Bifidobacterium	rs4777391	A	C	0.38763	0.0154611	0.485422	FALSE	71450067	0.0182903	0.0257815	6.60546e-06	0.0844541	TRUE
RHINOPHYMA	Genus Coprobacter	rs1711787	G	A	-0.856205	0.0290649	0.958004	FALSE	59543873	0.0216815	0.0641403	7.20858e-06	0.187344	TRUE
RHINOPHYMA	Genus Coprobacter	rs10263016	G	T	0.762323	-0.021209	0.0513232	FALSE	51641608	0.0237412	0.0574996	3.58501e-06	0.161335	TRUE
RHINOPHYMA	Genus Coprobacter	rs11683903	C	T	-0.524444	0.0737587	0.317801	FALSE	164967193	0.000385327	0.0292078	3.08e-06	0.108734	TRUE
RHINOPHYMA	Genus Coprobacter	rs11660732	T	C	-0.729636	-0.04838	0.221531	FALSE	8976002	0.00466047	0.0327671	8.88e-06	0.159327	TRUE
RHINOPHYMA	Genus Coprobacter	rs78581539	T	C	-0.637994	0.0367826	0.212335	FALSE	4403165	0.00901493	0.0333771	6.85e-06	0.137496	TRUE
RHINOPHYMA	Genus Coprobacter	rs36028712	C	T	1.12911	0.0464201	0.0572038	FALSE	96142562	0.0144431	0.059242	5.52e-09	0.183925	TRUE
RHINOPHYMA	Genus Coprobacter	rs55821918	G	A	1.05667	0.057064	0.0324335	FALSE	234843421	0.0153527	0.0773341	7.39e-06	0.228597	TRUE
RHINOPHYMA	Genus Coprobacter	rs4890818	A	G	0.74528	0.0323661	0.0708596	FALSE	77374613	0.0180828	0.053141	9.82e-06	0.16359	TRUE
RHINOPHYMA	Genus Coprobacter	rs6760757	C	T	-0.484051	0.0170741	0.713658	FALSE	79594167	0.0189864	0.0300256	7e-06	0.10443	TRUE
RHINOPHYMA	Genus Coprobacter	rs7191644	G	A	0.747886	0.0225251	0.0692792	FALSE	66124591	0.0224905	0.0536712	4.71e-06	0.158224	TRUE
RHINOPHYMA	Genus Coprobacter	rs12446684	T	C	-0.504327	-0.00670342	0.413033	FALSE	85966801	0.0269382	0.0276068	1.39e-06	0.100846	TRUE
RHINOPHYMA	Genus Lactococcus	rs62369502	C	T	0.948761	-0.010538	0.0630104	FALSE	43815476	0.0284145	0.0566519	6.56e-06	0.204025	TRUE
RHINOPHYMA	Genus Lactococcus	rs55821918	G	A	1.05667	-0.555732	0.0324867	FALSE	234843421	0.00197061	0.28263	7.39129e-06	0.228597	TRUE
RHINOPHYMA	Genus Lactococcus	rs7191644	G	A	0.747886	0.303412	0.0691608	FALSE	66124591	0.00510372	0.199133	4.70771e-06	0.158224	TRUE
RHINOPHYMA	Genus Lactococcus	rs11683903	C	T	-0.524444	-0.156827	0.31798	FALSE	164967193	0.00599588	0.108915	3.08302e-06	0.108734	TRUE
RHINOPHYMA	Genus Lactococcus	rs11660732	T	C	-0.729636	0.121372	0.222066	FALSE	8976002	0.0128614	0.122437	8.88068e-06	0.159327	TRUE
RHINOPHYMA	Genus Lactococcus	rs12446684	T	C	-0.504327	-0.0977265	0.41287	FALSE	85966801	0.0136604	0.102742	1.39129e-06	0.100846	TRUE
RHINOPHYMA	Genus Lactococcus	rs78581539	T	C	-0.637994	-0.102352	0.212334	FALSE	4403165	0.0164718	0.124707	6.85125e-06	0.137496	TRUE
RHINOPHYMA	Genus Lactococcus	rs6760757	C	T	-0.484051	-0.0241249	0.713801	FALSE	79594167	0.0331742	0.111933	6.99755e-06	0.10443	TRUE
SEBORRHOEIC	Phylum Firmicutes	rs36028712	C	T	1.12911	-0.0274984	0.056599	FALSE	96142562	0.0360484	0.221523	5.51588e-09	0.183925	TRUE
SEBORRHOEIC	Phylum Firmicutes	rs4890818	A	G	0.74528	-0.0239412	0.0710111	FALSE	77374613	0.0361387	0.197402	9.82296e-06	0.16359	TRUE
SEBORRHOEIC	Phylum Firmicutes	rs62369502	C	T	0.948761	-0.0212729	0.062602	FALSE	43815476	0.0367933	0.211364	6.55898e-06	0.204025	TRUE
SEBORRHOEIC	Phylum Firmicutes	rs2686392	C	T	0.718436	0.0491166	0.174861	FALSE	121234508	0.00567317	0.0358103	9.54e-06	0.155401	TRUE
SEBORRHOEIC	Phylum Firmicutes	rs78072264	C	A	1.26698	0.110704	0.0270282	FALSE	246404702	0.00651807	0.0855281	7.71e-06	0.271016	TRUE
SEBORRHOEIC	Phylum Firmicutes	rs9423029	G	A	-0.563956	0.0326393	0.236095	FALSE	125222377	0.0102783	0.0320404	9.02e-06	0.121625	TRUE
SEBORRHOEIC	Phylum Firmicutes	rs73260958	C	T	0.841373	0.0547614	0.0687812	FALSE	49010292	0.0104667	0.0543881	8.4e-06	0.180787	TRUE
SEBORRHOEIC	Phylum Firmicutes	rs4857241	T	C	0.683713	0.0241878	0.251165	FALSE	97127865	0.0147136	0.0314201	8.75e-06	0.147217	TRUE
SEBORRHOEIC	Phylum Firmicutes	rs10403639	T	C	0.586766	0.0185817	0.641111	FALSE	34584854	0.0170992	0.0284033	1.89e-06	0.117167	TRUE
SEBORRHOEIC	Phylum Firmicutes	rs4241944	G	A	-0.981622	-0.0344734	0.93095	FALSE	130472701	0.0174967	0.0542196	5.11e-06	0.205624	TRUE
SEBORRHOEIC	Phylum Firmicutes	rs10042145	G	T	0.934404	-0.0180655	0.0907408	FALSE	113809316	0.0233666	0.047049	5.77e-06	0.196926	TRUE
SEBORRHOEIC	Phylum Firmicutes	rs9965114	C	T	0.769479	-0.0112102	0.193199	FALSE	32236365	0.0248174	0.0344008	4.52e-06	0.160201	TRUE
SEBORRHOEIC	Phylum Firmicutes	rs138415548	G	A	-1.13886	-0.0178696	0.0365414	FALSE	109508336	0.026849	0.07256	2.28e-06	0.229375	TRUE
SEBORRHOEIC	Phylum Firmicutes	rs10042145	G	T	0.934404	-0.269772	0.0911636	FALSE	113809316	0.00482556	0.173811	5.7661e-06	0.196926	TRUE
SEBORRHOEIC	Phylum Tenericutes	rs9965114	C	T	0.769479	-0.183518	0.193341	FALSE	32236365	0.00614348	0.128606	4.52072e-06	0.160201	TRUE
SEBORRHOEIC	Phylum Tenericutes	rs10403639	T	C	0.586766	-0.131247	0.64117	FALSE	34584854	0.00870644	0.106465	1.8947e-06	0.117167	TRUE
SEBORRHOEIC	Phylum Tenericutes	rs78072264	C	A	1.26698	0.386816	0.0268844	FALSE	246404702	0.00904268	0.319536	7.70735e-06	0.271016	TRUE
SEBORRHOEIC	Phylum Tenericutes	rs73260958	C	T	0.841373	-0.221653	0.0683968	FALSE	49010292	0.0110702	0.203793	8.4034e-06	0.180787	TRUE
SEBORRHOEIC	Phylum Tenericutes	rs9423029	G	A	-0.563956	0.109898	0.235558	FALSE	125222377	0.014371	0.119877	9.01534e-06	0.121625	TRUE
SEBORRHOEIC	Phylum Tenericutes	rs138415548	G	A	-1.13886	0.137541	0.0366744	FALSE	109508336	0.0245134	0.271802	2.27727e-06	0.229375	TRUE
SEBORRHOEIC	Phylum Tenericutes	rs4857241	T	C	0.683713	0.0586763	0.250795	FALSE	97127865	0.0246532	0.117105	8.74507e-06	0.147217	TRUE
SEBORRHOEIC	Phylum Tenericutes	rs4241944	G	A	-0.981622	0.0221296	0.931626	FALSE	130472701	0.0365173	0.202391	5.11109e-06	0.205624	TRUE
SEBORRHOEIC	Phylum Tenericutes	rs2686392	C	T	0.718436	0.00257657	0.174534	FALSE	121234508	0.0393859	0.133892	9.53725e-06	0.155401	TRUE
SEBORRHOEIC	Phylum Tenericutes	rs13184329	A	G	0.586449	-0.153737	0.174473	FALSE	58485148	0.0315479	0.0715023	8.71517e-07	0.116046	TRUE
SEBORRHOEIC	Phylum Tenericutes	rs13184329	A	G	0.586449	0.0791738	0.174603	FALSE	58485148	0.0277875	0.0359836	8.71517e-07	0.116046	TRUE
SEBORRHOEIC	Phylum Tenericutes	rs2816456	G	A	-0.417576	0.277204	0.389075	FALSE	5991148	0.0146508	0.113566	8.08751e-06	0.0914907	TRUE
SEBORRHOEIC	Class Mollicutes	rs6917797	G	A	0.546826	0.0451984	0.189199	FALSE	66482957	0.0168951	0.0189195	7.26374e-06	0.119158	TRUE
SEBORRHOEIC	Class Mollicutes	rs1380759	T	C	0.411499	-0.0559171	0.220225	FALSE	83756960	0.0165101	0.0233237	6.33909e-06	0.0890781	TRUE
SEBORRHOEIC	Class Mollicutes	rs6917797	G	A	0.546826	0.0705791	0.189172	FALSE	66482957	0.0201762	0.0303821	7.26374e-06	0.119158	TRUE
SEBORRHOEIC	Class Mollicutes	rs1380759	T	C	0.411499	0.0656026	0.220131	FALSE	83756960	0.0225242	0.0287553	6.33909e-06	0.0890781	TRUE
SEBORRHOEIC	Class Mollicutes	rs1380759	T	C	0.411499	0.0331013	0.22023	FALSE	83756960	0.0291541	0.0151744	6.33909e-06	0.0890781	TRUE
SEBORRHOEIC	Class Mollicutes	rs6917797	G	A	0.546826	0.326632	0.189089	FALSE	66482957	0.0148477	0.134081	7.26374e-06	0.119158	TRUE
SEBORRHOEIC	Class Mollicutes	rs1380759	T	C	0.411499	0.0201738	0.220118	FALSE	83756960	0.00262931	0.0180205	6.33909e-06	0.0890781	TRUE
SEBORRHOEIC	Class Mollicutes	rs2816456	G	A	-0.417576	0.00725598	0.388959	FALSE	5991148	0.00636297	0.0153442	8.08751e-06	0.0914907	TRUE
SEBORRHOEIC	Class Mollicutes	rs13184329	A	G	0.586449	0.00916078	0.174579	FALSE	58485148	0.00641653	0.0196841	8.71517e-07	0.116046	TRUE
SEBORRHOEIC	Class Mollicutes	rs6917797	G	A	0.546826	0.00393617	0.189062	FALSE	66482957	0.00836652	0.0190912	7.26374e-06	0.119158	TRUE
SEBORRHOEIC	Class Mollicutes	rs13184329	A	G	0.586449	-0.0303229	0.174717	FALSE	58485148	0.000836584	0.0148991	8.71517e-07	0.116046	TRUE
SEBORRHOEIC	Class Mollicutes	rs6917797	G	A	0.546826	0.020549	0.189492	FALSE	66482957	0.00310526	0.0144591	7.26374e-06	0.119158	TRUE
SEBORRHOEIC	Genus Butyrivibrio	rs1380759	T	C	0.411499	0.0103376	0.219885	FALSE	83756960	0.00895718	0.0136202	6.33909e-06	0.0890781	TRUE
SEBORRHOEIC	Genus Butyrivibrio	rs2816456	G	A	-0.417576	-0.00324601	0.389003	FALSE	5991148	0.015601	0.0116239	8.08751e-06	0.0914907	TRUE
SEBORRHOEIC	Genus Butyrivibrio	rs13184329	A	G	0.586449	-0.0537741	0.174887	FALSE	58485148	0.00293933	0.0343595	8.71517e-07	0.116046	TRUE
SEBORRHOEIC	Genus Butyrivibrio	rs6917797	G	A	0.546826	0.0232111	0.189398	FALSE	66482957	0.012199	0.0334668	7.26374e-06	0.119158	TRUE
SEBORRHOEIC	Genus Butyrivibrio	rs1380759	T	C	0.411499	0.010661	0.21973	FALSE	83756960	0.0183827	0.0315347	6.33909e-06	0.0890781	TRUE
SEBORRHOEIC	Genus Butyrivibrio	rs2816456	G	A	-0.417576	-0.00361573	0.38899	FALSE	5991148	0.0223195	0.0268252	8.08751e-06	0.0914907	TRUE
SEBORRHOEIC	Genus Butyrivibrio	rs1380759	T	C	0.411499	-0.0517209	0.219612	FALSE	83756960	0.00316059	0.0309612	6.33909e-06	0.0890781	TRUE
SEBORRHOEIC	Genus Butyrivibrio	rs6917797	G	A	0.546826	0.0485877	0.189411	FALSE	66482957	0.00468583	0.0329709	7.26374e-06	0.119158	TRUE
SEBORRHOEIC	Genus Butyrivibrio	rs13184329	A	G	0.586449	-0.0269579	0.174931	FALSE	58485148	0.0141176	0.033684	8.71517e-07	0.116046	TRUE
SEBORRHOEIC	Genus Butyrivibrio	rs2816456	G	A	-0.417576	-0.00859844	0.388978	FALSE	5991148	0.0248018	0.0263361	8.08751e-06	0.0914907	TRUE
SEBORRHOEIC	Genus Butyrivibrio	rs4903911	T	C	0.671894	0.102091	0.153684	FALSE	80358282	0.000194966	0.0370415	6.57e-06	0.145794	TRUE
SEBORRHOEIC	Genus Butyrivibrio	rs2445574	A	G	0.389488	0.0495837	0.47727	FALSE	87039639	0.00227845	0.0272039	9.32e-06	0.0860037	TRUE
SEBORRHOEIC	Genus Butyrivibrio	rs1900523	G	C	-0.415625	0.0426454	0.382571	FALSE	104198369	0.00425333	0.0279892	5.88e-06	0.0897023	TRUE
SEBORRHOEIC	Genus Butyrivibrio	rs7138327	A	C	0.442141	0.0380902	0.385393	FALSE	95736955	0.0057551	0.0279309	1.7e-06	0.0900971	TRUE
SEBORRHOEIC	Genus Butyrivibrio	rs17367713	T	C	0.890986	0.0743893	0.0526233	FALSE	42134602	0.00736433	0.0607727	6.77e-06	0.193621	TRUE
SEBORRHOEIC	Genus Eubacteriumeligensgroup	rs707110	T	C	-0.639269	-0.0487084	0.902164	FALSE	154469626	0.00966143	0.0460179	4.12e-06	0.135644	TRUE
SEBORRHOEIC	Genus Eubacteriumeligensgroup	rs3764922	C	T	-0.63008	0.0496726	0.0757506	FALSE	15238257	0.0112794	0.0518846	7.64e-06	0.137749	TRUE
SEBORRHOEIC	Genus Eubacteriumeligensgroup	rs1530634	T	C	-0.49176	-0.0227034	0.274206	FALSE	45755974	0.0152123	0.0304809	8.36e-06	0.107997	TRUE
SEBORRHOEIC	Genus Eubacteriumeligensgroup	rs4293456	C	T	-0.378585	0.0132173	0.602103	FALSE	1086689	0.0211821	0.0278816	9.59e-06	0.0837166	TRUE
SEBORRHOEIC	Genus Eubacteriumeligensgroup	rs11897498	A	T	0.652328	-0.0180442	0.141843	FALSE	62851620	0.0214694	0.0390569	1.23e-06	0.131083	TRUE
SEBORRHOEIC	Genus Eubacteriumeligensgroup	rs2817006	T	C	0.491619	-0.0133987	0.207165	FALSE	200042690	0.0229771	0.0335143	6.36e-06	0.106511	TRUE
SEBORRHOEIC	Genus Eubacteriumeligensgroup	rs707110	T	C	-0.639269	0.405282	0.902261	FALSE	154469626	0.000764328	0.172945	4.12408e-06	0.135644	TRUE
SEBORRHOEIC	Genus Howardella	rs17367713	T	C	0.890986	0.402799	0.0526238	FALSE	42134602	0.0031209	0.228568	6.76577e-06	0.193621	TRUE
SEBORRHOEIC	Genus Howardella	rs2445574	A	G	0.389488	0.10746	0.477721	FALSE	87039639	0.0115546	0.101319	9.31901e-06	0.0860037	TRUE
SEBORRHOEIC	Genus Howardella	rs2817006	T	C	0.491619	-0.113793	0.207618	FALSE	200042690	0.0145362	0.125199	6.36107e-06	0.106511	TRUE
SEBORRHOEIC	Genus Howardella	rs7138327	A	C	0.442141	-0.0888107	0.384988	FALSE	95736955	0.0158275	0.104563	1.69666e-06	0.0900971	TRUE
SEBORRHOEIC	Genus Howardella	rs3764922	C	T	-0.63008	-0.15047	0.0754026	FALSE	15238257	0.0175132	0.193938	7.63928e-06	0.137749	TRUE
SEBORRHOEIC	Genus Howardella	rs4293456	C	T	-0.378585	0.0476322	0.603008	FALSE	1086689	0.0259102	0.104255	9.58745e-06	0.0837166	TRUE
SEBORRHOEIC	Genus Howardella	rs1530634	T	C	-0.49176	0.0352331	0.274609	FALSE	45755974	0.0302924	0.114017	8.36438e-06	0.107997	TRUE
SEBORRHOEIC	Genus Howardella	rs4903911	T	C	0.671894	0.0332644	0.153383	FALSE	80358282	0.0326334	0.142823	6.56551e-06	0.145794	TRUE
SEBORRHOEIC	Genus Howardella	rs11897498	A	T	0.652328	-0.0120537	0.141846	FALSE	62851620	0.0373744	0.146352	1.2299e-06	0.131083	TRUE
SEBORRHOEIC	Genus Lachnospiraceaenc2004Group	rs1900523	G	C	-0.415625	-0.00492158	0.381647	FALSE	104198369	0.0384959	0.10439	5.88073e-06	0.0897023	TRUE
SEBORRHOEIC	Genus Lachnospiraceaenc2004Group	rs1417689	C	T	0.429214	0.0704561	0.415117	FALSE	63126735	0.0102989	0.0274616	6.85792e-06	0.0934016	TRUE
SEBORRHOEIC	Genus Lachnospiraceaenc2004Group	rs75742406	A	G	-0.491584	0.174973	0.27797	FALSE	17048818	0.0251235	0.0781305	2.34712e-06	0.10171	TRUE
SEBORRHOEIC	Genus Lachnospiraceaenc2004Group	rs78998127	A	T	-0.675704	-0.0373295	0.0582981	FALSE	101611289	0.0197206	0.0160101	7.95983e-06	0.14813	TRUE
SEBORRHOEIC	Genus Lachnospiraceaenc2004Group	rs78998127	A	T	-0.675704	-0.0678754	0.0582981	FALSE	101611289	0.0117144	0.0269279	7.95983e-06	0.14813	TRUE
SEBORRHOEIC	Genus Lachnospiraceaenc2004Group	rs78998127	A	T	-0.675704	-0.0906586	0.058313	FALSE	101611289	0.00558316	0.0327133	7.95983e-06	0.14813	TRUE
SEBORRHOEIC	Genus Lachnospiraceaenc2004Group	rs9887771	G	C	0.469644	0.0242387	0.282751	FALSE	99811188	0.0014413	0.0165952	9.12111e-06	0.103663	TRUE
SEBORRHOEIC	Genus Lachnospiraceaenc2004Group	rs1521825	A	G	-0.431833	-0.0145364	0.675119	FALSE	83172197	0.00362266	0.0159555	4.8556e-06	0.0924111	TRUE
SEBORRHOEIC	Genus Lachnospiraceaenc2004Group	rs75742406	A	G	-0.491584	0.0133	0.277985	FALSE	17048818	0.00426285	0.0167177	2.34712e-06	0.10171	TRUE
SEBORRHOEIC	Genus Ruminiclostridium5	rs7244378	A	G	-0.571015	-0.00611125	0.178152	FALSE	63435607	0.00754357	0.0195311	3.75178e-07	0.109377	TRUE
SEBORRHOEIC	Genus Ruminiclostridium5	rs1417689	C	T	0.429214	0.00227038	0.414967	FALSE	63126735	0.00881217	0.0151939	6.85792e-06	0.0934016	TRUE
SEBORRHOEIC	Genus Ruminiclostridium5	rs78998127	A	T	-0.675704	0.0522155	0.0582192	FALSE	101611289	0.000608598	0.0241241	7.95983e-06	0.14813	TRUE
SEBORRHOEIC	Genus Ruminiclostridium5	rs7244378	A	G	-0.571015	0.0297983	0.17749	FALSE	63435607	0.000879386	0.0147928	3.75178e-07	0.109377	TRUE
SEBORRHOEIC	Genus Ruminiclostridium5	rs1417689	C	T	0.429214	-0.0219043	0.414697	FALSE	63126735	0.00114726	0.0115254	6.85792e-06	0.0934016	TRUE
SEBORRHOEIC	Genus Ruminiclostridium5	rs9887771	G	C	0.469644	0.0207847	0.283215	FALSE	99811188	0.00198084	0.0126005	9.12111e-06	0.103663	TRUE
SEBORRHOEIC	Genus Ruminiclostridium5	rs75742406	A	G	-0.491584	0.00374121	0.27806	FALSE	17048818	0.0153556	0.0126701	2.34712e-06	0.10171	TRUE
SEBORRHOEIC	Genus Ruminiclostridium5	rs1521825	A	G	-0.431833	-0.00260715	0.67572	FALSE	83172197	0.0165896	0.0121055	4.8556e-06	0.0924111	TRUE
SEBORRHOEIC	Genus Ruminiclostridium5	rs7244378	A	G	-0.571015	-0.051611	0.1771	FALSE	63435607	0.00327165	0.0341637	3.75178e-07	0.109377	TRUE
SEBORRHOEIC	Genus Ruminiclostridium5	rs9887771	G	C	0.469644	0.041776	0.283263	FALSE	99811188	0.00380842	0.0291869	9.12111e-06	0.103663	TRUE
SEBORRHOEIC	Genus Ruminiclostridium5	rs78998127	A	T	-0.675704	-0.0260001	0.0580187	FALSE	101611289	0.0160395	0.0558552	7.95983e-06	0.14813	TRUE
SEBORRHOEIC	Genus Senegalimassilia	rs1417689	C	T	0.429214	-0.00798904	0.414934	FALSE	63126735	0.0191019	0.0266185	6.85792e-06	0.0934016	TRUE
SEBORRHOEIC	Genus Senegalimassilia	rs1521825	A	G	-0.431833	-0.00456831	0.675804	FALSE	83172197	0.0217524	0.0279347	4.8556e-06	0.0924111	TRUE
SEBORRHOEIC	Genus Senegalimassilia	rs75742406	A	G	-0.491584	-0.00119834	0.277936	FALSE	17048818	0.0241849	0.0293183	2.34712e-06	0.10171	TRUE
SEBORRHOEIC	Genus Senegalimassilia	rs7244378	A	G	-0.571015	0.0273239	0.177218	FALSE	63435607	0.0138319	0.0335179	3.75178e-07	0.109377	TRUE
SEBORRHOEIC	Genus Senegalimassilia	rs1521825	A	G	-0.431833	0.0197791	0.675859	FALSE	83172197	0.0157103	0.0274576	4.8556e-06	0.0924111	TRUE
SEBORRHOEIC	Genus Victivallis	rs9887771	G	C	0.469644	-0.0134127	0.283137	FALSE	99811188	0.021344	0.0287056	9.12111e-06	0.103663	TRUE
SEBORRHOEIC	Genus Victivallis	rs75742406	A	G	-0.491584	0.0111601	0.277989	FALSE	17048818	0.0232709	0.0287743	2.34712e-06	0.10171	TRUE
SEBORRHOEIC	Genus Victivallis	rs78998127	A	T	-0.675704	-0.00151965	0.0580407	FALSE	101611289	0.0325944	0.0546876	7.95983e-06	0.14813	TRUE
SEBORRHOEIC	Genus Victivallis	rs1417689	C	T	0.429214	1.32586e-05	0.414927	FALSE	63126735	0.0333199	0.0261878	6.85792e-06	0.0934016	TRUE
SEBORRHOEIC	Genus Victivallis	rs62116326	A	G	1.14489	-0.270754	0.0677543	FALSE	16224482	0.0126955	0.10864	4.75348e-06	0.239651	TRUE
SEBORRHOEIC	Genus Victivallis	rs2062360	A	G	-0.612658	-0.0836591	0.273176	FALSE	90830754	0.00663804	0.0308196	9.59006e-06	0.13292	TRUE
SEBORRHOEIC	Genus Victivallis	rs6992214	T	C	1.17374	-0.493923	0.0761248	FALSE	132108220	0.0307121	0.228585	2.45943e-07	0.215348	TRUE
SEBORRHOEIC	Genus Victivallis	rs2062360	A	G	-0.612658	-0.0672425	0.272987	FALSE	90830754	0.047863	0.0339852	9.59006e-06	0.13292	TRUE
SEBORRHOEIC	Genus Victivallis	rs2062360	A	G	-0.612658	-0.07011	0.2731	FALSE	90830754	0.0230255	0.0308445	9.59006e-06	0.13292	TRUE
SEBORRHOEIC	Genus Victivallis	rs62116326	A	G	1.14489	-0.141037	0.0677393	FALSE	16224482	0.0168264	0.0589996	4.75348e-06	0.239651	TRUE
SEBORRHOEIC	Genus Victivallis	rs113717146	A	T	0.826201	-0.117988	0.0934183	FALSE	19180947	0.0204588	0.0509045	4.22994e-06	0.171949	TRUE
PILONIDALCYST	Phylum Tenericutes	rs62116326	A	G	1.14489	-0.469061	0.0677393	FALSE	16224482	0.0161681	0.195028	4.75348e-06	0.239651	TRUE
PILONIDALCYST	Phylum Tenericutes	rs62116326	A	G	1.14489	0.0980937	0.0676896	FALSE	16224482	0.00688414	0.0362988	4.75348e-06	0.239651	TRUE
PILONIDALCYST	Phylum Tenericutes	rs55826714	T	C	0.855151	-0.0724568	0.10929	FALSE	43748255	0.0170087	0.0303608	1.78981e-06	0.170848	TRUE
PILONIDALCYST	Phylum Tenericutes	rs113717146	A	T	0.826201	-0.074634	0.0933605	FALSE	19180947	0.0447662	0.0371897	4.22994e-06	0.171949	TRUE
PILONIDALCYST	Phylum Tenericutes	rs113717146	A	T	0.826201	-0.293613	0.0934069	FALSE	19180947	0.0147778	0.120443	4.22994e-06	0.171949	TRUE
PILONIDALCYST	Phylum Tenericutes	rs2567503	T	C	-0.700348	0.0703811	0.853708	FALSE	72717226	0.0373585	0.0338074	6.65488e-06	0.149099	TRUE
PILONIDALCYST	Phylum Tenericutes	rs2062360	A	G	-0.612658	-0.0351549	0.273072	FALSE	90830754	0.036211	0.016784	9.59006e-06	0.13292	TRUE
PILONIDALCYST	Phylum Tenericutes	rs55705411	A	G	1.031	-0.0525259	0.055996	FALSE	104505885	0.00110604	0.0329216	8.85927e-06	0.222757	TRUE
PILONIDALCYST	Phylum Tenericutes	rs1869245	A	G	0.837417	0.0369506	0.101938	FALSE	5639558	0.00137674	0.0248908	3.90961e-06	0.173613	TRUE
PILONIDALCYST	Phylum Tenericutes	rs113717146	A	T	0.826201	0.0302277	0.0934516	FALSE	19180947	0.00238032	0.0256184	4.22994e-06	0.171949	TRUE
PILONIDALCYST	Phylum Tenericutes	rs55826714	T	C	0.855151	-0.0130491	0.109216	FALSE	43748255	0.00586048	0.0239621	1.78981e-06	0.170848	TRUE
PILONIDALCYST	Phylum Tenericutes	rs62116326	A	G	1.14489	0.0134855	0.067755	FALSE	16224482	0.00650853	0.0297972	4.75348e-06	0.239651	TRUE
PILONIDALCYST	Class Mollicutes	rs6992214	T	C	1.17374	-0.0101534	0.0760982	FALSE	132108220	0.00719809	0.0283048	2.45943e-07	0.215348	TRUE
PILONIDALCYST	Class Mollicutes	rs2567503	T	C	-0.700348	-0.00257915	0.853622	FALSE	72717226	0.00903432	0.0212578	6.65488e-06	0.149099	TRUE
PILONIDALCYST	Class Mollicutes	rs62116326	A	G	1.14489	0.0575553	0.0678837	FALSE	16224482	0.000198948	0.0223285	4.75348e-06	0.239651	TRUE
PILONIDALCYST	Class Mollicutes	rs55826714	T	C	0.855151	-0.03471	0.10887	FALSE	43748255	0.00110558	0.0181095	1.78981e-06	0.170848	TRUE
PILONIDALCYST	Class Mollicutes	rs1869245	A	G	0.837417	0.0135499	0.101133	FALSE	5639558	0.00947076	0.018905	3.90961e-06	0.173613	TRUE
PILONIDALCYST	Class Mollicutes	rs2062360	A	G	-0.612658	0.0048599	0.273545	FALSE	90830754	0.0140618	0.0127504	9.59006e-06	0.13292	TRUE
PILONIDALCYST	Class Mollicutes	rs55705411	A	G	1.031	0.00773072	0.0561994	FALSE	104505885	0.0151399	0.0249839	8.85927e-06	0.222757	TRUE
PILONIDALCYST	Class Mollicutes	rs2567503	T	C	-0.700348	0.00474447	0.853813	FALSE	72717226	0.0153729	0.0161297	6.65488e-06	0.149099	TRUE
PILONIDALCYST	Class Mollicutes	rs6992214	T	C	1.17374	0.00503018	0.0762193	FALSE	132108220	0.0162664	0.0213011	2.45943e-07	0.215348	TRUE
PILONIDALCYST	Class Mollicutes	rs113717146	A	T	0.826201	-0.00236715	0.0933488	FALSE	19180947	0.0180553	0.0193756	4.22994e-06	0.171949	TRUE
PILONIDALCYST	Class Mollicutes	rs1869245	A	G	0.837417	0.109075	0.101107	FALSE	5639558	0.000297817	0.0433745	3.90961e-06	0.173613	TRUE
PILONIDALCYST	Class Mollicutes	rs113717146	A	T	0.826201	-0.0896549	0.0932648	FALSE	19180947	0.0011171	0.0446574	4.22994e-06	0.171949	TRUE
PILONIDALCYST	Genus Adlercreutzia	rs2567503	T	C	-0.700348	-0.0383683	0.853756	FALSE	72717226	0.00759183	0.0373019	6.65488e-06	0.149099	TRUE
PILONIDALCYST	Genus Adlercreutzia	rs62116326	A	G	1.14489	0.0517729	0.0677162	FALSE	16224482	0.00815007	0.0527114	4.75348e-06	0.239651	TRUE
PILONIDALCYST	Genus Adlercreutzia	rs55705411	A	G	1.031	0.0365688	0.0562623	FALSE	104505885	0.0132153	0.058034	8.85927e-06	0.222757	TRUE
PILONIDALCYST	Genus Adlercreutzia	rs55826714	T	C	0.855151	-0.0214682	0.10895	FALSE	43748255	0.0151726	0.0417268	1.78981e-06	0.170848	TRUE
PILONIDALCYST	Genus Adlercreutzia	rs2062360	A	G	-0.612658	0.00449671	0.273555	FALSE	90830754	0.0219703	0.0294912	9.59006e-06	0.13292	TRUE
PILONIDALCYST	Genus Adlercreutzia	rs6992214	T	C	1.17374	0.00664917	0.0761437	FALSE	132108220	0.0223222	0.0493807	2.45943e-07	0.215348	TRUE
PILONIDALCYST	Genus Adlercreutzia	rs2062360	A	G	-0.612658	-0.0638457	0.273414	FALSE	90830754	0.000929263	0.029034	9.59006e-06	0.13292	TRUE
PILONIDALCYST	Genus Adlercreutzia	rs55705411	A	G	1.031	0.0766354	0.0562748	FALSE	104505885	0.0059691	0.0570367	8.85927e-06	0.222757	TRUE
PILONIDALCYST	Genus Lachnoclostridium	rs1869245	A	G	0.837417	0.0563542	0.101065	FALSE	5639558	0.00618823	0.0425776	3.90961e-06	0.173613	TRUE
PILONIDALCYST	Genus Lachnoclostridium	rs62116326	A	G	1.14489	0.0560011	0.0677223	FALSE	16224482	0.009269	0.0516299	4.75348e-06	0.239651	TRUE
PILONIDALCYST	Genus Lachnoclostridium	rs6992214	T	C	1.17374	0.0443376	0.076168	FALSE	132108220	0.0120331	0.0485371	2.45943e-07	0.215348	TRUE
PILONIDALCYST	Genus Lachnoclostridium	rs113717146	A	T	0.826201	0.0228874	0.093359	FALSE	19180947	0.0200665	0.0438847	4.22994e-06	0.171949	TRUE
PILONIDALCYST	Genus Lachnoclostridium	rs55826714	T	C	0.855151	-0.0153938	0.108964	FALSE	43748255	0.0235471	0.0408673	1.78981e-06	0.170848	TRUE
PILONIDALCYST	Genus Lachnoclostridium	rs2567503	T	C	-0.700348	0.00879774	0.853802	FALSE	72717226	0.0269824	0.0364888	6.65488e-06	0.149099	TRUE
PILONIDALCYST	Genus Lachnoclostridium	rs16840810	T	C	0.711856	-0.104232	0.05522	FALSE	4121478	0.00267423	0.0595827	8.23e-06	0.156834	TRUE
PILONIDALCYST	Genus Lachnoclostridium	rs4838097	C	T	-0.610949	-0.067795	0.0881213	FALSE	124052300	0.00536223	0.0483503	5.83e-06	0.132304	TRUE
PILONIDALCYST	Genus Lachnoclostridium	rs112405294	A	G	-0.707994	-0.05528	0.0773152	FALSE	177991084	0.0092405	0.0508744	7.09e-06	0.154801	TRUE
PILONIDALCYST	Genus Lachnoclostridium	rs28809888	T	C	0.375117	-0.0169396	0.431515	FALSE	97464884	0.0178671	0.0273727	6.16e-06	0.0814353	TRUE
PILONIDALCYST	Genus Lachnoclostridium	rs17315740	C	T	-0.516693	-0.0204532	0.128637	FALSE	108850783	0.020613	0.0410598	2.2e-06	0.106976	TRUE
PILONIDALCYST	Genus Lachnoclostridium	rs2502107	G	C	0.518888	-0.0127689	0.175566	FALSE	29939175	0.0240416	0.035788	3.95e-06	0.110299	TRUE
PILONIDALCYST	Genus Lachnoclostridium	rs11694118	C	A	0.448894	0.00946284	0.324689	FALSE	208077000	0.0248199	0.0290475	7.02e-07	0.0883826	TRUE
PILONIDALCYST	Genus Ruminococcaceaeucg011	rs34332740	C	A	-0.553203	-0.00930472	0.141047	FALSE	11712107	0.0270336	0.0389114	2.27e-07	0.104378	TRUE
PILONIDALCYST	Genus Ruminococcaceaeucg011	rs11728982	C	G	0.498625	-0.00374785	0.184628	FALSE	13945731	0.0304925	0.0350208	7.02e-06	0.108948	TRUE
PILONIDALCYST	Genus Ruminococcaceaeucg011	rs30480	A	G	-0.650666	-0.00321092	0.102125	FALSE	39316573	0.0314293	0.0448138	7.14e-07	0.128372	TRUE
PILONIDALCYST	Genus Ruminococcaceaeucg011	rs10886364	T	C	-0.418399	-0.000285878	0.341538	FALSE	119015413	0.0330679	0.0286492	8.44e-07	0.0830725	TRUE
PILONIDALCYST	Genus Ruminococcaceaeucg011	rs17315740	C	T	-0.516693	0.349338	0.128092	FALSE	108850783	0.000919284	0.153641	2.19703e-06	0.106976	TRUE
PILONIDALCYST	Genus Ruminococcaceaeucg011	rs30480	A	G	-0.650666	0.213514	0.101618	FALSE	39316573	0.0081828	0.168302	7.13888e-07	0.128372	TRUE
PILONIDALCYST	Genus Ruminococcaceaeucg011	rs4838097	C	T	-0.610949	0.22407	0.0878122	FALSE	124052300	0.00867324	0.181433	5.82904e-06	0.132304	TRUE
PILONIDALCYST	Genus Ruminococcaceaeucg011	rs112405294	A	G	-0.707994	-0.106246	0.0772506	FALSE	177991084	0.0231887	0.19185	7.0934e-06	0.154801	TRUE
PILONIDALCYST	Genus Sutterella	rs11728982	C	G	0.498625	-0.0561368	0.184496	FALSE	13945731	0.0266684	0.130349	7.02153e-06	0.108948	TRUE
PILONIDALCYST	Genus Sutterella	rs16840810	T	C	0.711856	0.0878285	0.0552183	FALSE	4121478	0.0278992	0.225939	8.23264e-06	0.156834	TRUE
PILONIDALCYST	Genus Sutterella	rs28809888	T	C	0.375117	0.0344417	0.432843	FALSE	97464884	0.0294606	0.102362	6.16047e-06	0.0814353	TRUE
PILONIDALCYST	Genus Sutterella	rs11694118	C	A	0.448894	-0.0158731	0.325065	FALSE	208077000	0.0353434	0.108403	7.02447e-07	0.0883826	TRUE
PILONIDALCYST	Genus Sutterella	rs10886364	T	C	-0.418399	-0.00573598	0.340726	FALSE	119015413	0.0382954	0.107346	8.43993e-07	0.0830725	TRUE
PILONIDALCYST	Genus Sutterella	rs34332740	C	A	-0.553203	0.00500268	0.140903	FALSE	11712107	0.038898	0.144849	2.26678e-07	0.104378	TRUE
PILONIDALCYST	Genus Sutterella	rs2502107	G	C	0.518888	-0.00297708	0.175844	FALSE	29939175	0.0392898	0.133774	3.94648e-06	0.110299	TRUE
PILONIDALCYST	Genus Sutterella	rs775451	G	A	1.04609	-0.0905952	0.127587	FALSE	69718927	0.0259113	0.0406705	5.21176e-06	0.217678	TRUE
PILONIDALCYST	Genus Sutterella	rs12605162	T	A	-0.589549	0.0284431	0.598021	FALSE	77384196	0.0144941	0.0116342	1.46379e-06	0.115349	TRUE
PILONIDALCYST	Genus Sutterella	rs775451	G	A	1.04609	-0.0414444	0.127483	FALSE	69718927	0.0155174	0.0171253	5.21176e-06	0.217678	TRUE
PILONIDALCYST	Genus Sutterella	rs10811919	T	A	0.639883	-0.0984185	0.598372	FALSE	23394990	0.00338883	0.0335891	3.61581e-06	0.130731	TRUE
PILONIDALCYST	Genus Sutterella	rs975097	T	A	0.651087	-0.0696565	0.332202	FALSE	69297730	0.0161239	0.02895	6.99978e-06	0.137557	TRUE

## Sheet: Table S3
Table S3. Detailed information for instrumental variables between SADs and skin microbiota in the reverse MR
Outcome	Exposure	Microenvironment	SNP	Effect_allele	Other_allele	Beta.exposure	Beta.outcome	Eaf.outcome	Palindromic	Pos.outcome	Pval.outcome	Se.outcome	Pval.exposure	Se.exposure	Mr_keep
Asv003[Staphylococcus (unc.)]	DISORDSKINAPPENDIX	Dry	rs34581318	T	G	-0.713963	-0.00718573	0.144693	FALSE	146802776	0.0131483	0.0162028	5.27128e-06	0.151993	TRUE
Asv003[Staphylococcus (unc.)]	DISORDSKINAPPENDIX	Dry	rs5768971	A	G	-0.492199	4.17425e-05	0.638696	FALSE	46571720	0.0199434	0.0117722	2.75151e-06	0.101405	TRUE
Asv003[Staphylococcus (unc.)]	DISORDSKINAPPENDIX	Dry	rs10179400	T	C	-0.658274	-0.0878185	0.776644	FALSE	45161173	0.000112702	0.0309195	5.89202e-07	0.127015	TRUE
Asv003[Staphylococcus (unc.)]	DISORDSKINAPPENDIX	Dry	rs10747263	T	G	-0.47831	-0.0668891	0.72279	FALSE	121491442	0.000547897	0.029186	7.68307e-06	0.103715	TRUE
Asv003[Staphylococcus (unc.)]	DISORDSKINAPPENDIX	Dry	rs62014062	C	T	0.752958	-0.0501687	0.117064	FALSE	46545573	0.00558647	0.0412103	2.30127e-06	0.153915	TRUE
Asv003[Staphylococcus (unc.)]	DISORDSKINAPPENDIX	Dry	rs716073	A	C	0.769835	-0.0443735	0.107913	FALSE	26467198	0.00733613	0.0422365	5.65581e-06	0.164306	TRUE
Asv003[Staphylococcus (unc.)]	DISORDSKINAPPENDIX	Dry	rs5768971	A	G	-0.492199	0.0229676	0.638801	FALSE	46571720	0.00996865	0.0272173	2.75151e-06	0.101405	TRUE
Asv003[Staphylococcus (unc.)]	DISORDSKINAPPENDIX	Dry	rs73111893	A	C	0.664653	-0.0103345	0.0875966	FALSE	52891746	0.02057	0.0461469	7.97863e-06	0.144423	TRUE
Asv003[Staphylococcus (unc.)]	DISORDSKINAPPENDIX	Dry	rs34581318	T	G	-0.713963	-0.00510808	0.144811	FALSE	146802776	0.0222937	0.0375338	5.27128e-06	0.151993	TRUE
Asv003[Staphylococcus (unc.)]	DISORDSKINAPPENDIX	Dry	rs5768971	A	G	-0.492199	0.0605904	0.638902	FALSE	46571720	0.0007813	0.0267366	2.75151e-06	0.101405	TRUE
Asv003[Staphylococcus (unc.)]	DISORDSKINAPPENDIX	Dry	rs10747263	T	G	-0.47831	-0.0497758	0.722811	FALSE	121491442	0.00276598	0.0287115	7.68307e-06	0.103715	TRUE
Asv003[Staphylococcus (unc.)]	DISORDSKINAPPENDIX	Dry	rs34581318	T	G	-0.713963	0.0611999	0.144892	FALSE	146802776	0.00323943	0.0368969	5.27128e-06	0.151993	TRUE
Asv003[Staphylococcus (unc.)]	DISORDSKINAPPENDIX	Dry	rs62014062	C	T	0.752958	-0.0459724	0.117069	FALSE	46545573	0.00849253	0.0403683	2.30127e-06	0.153915	TRUE
Asv003[Staphylococcus (unc.)]	DISORDSKINAPPENDIX	Dry	rs10179400	T	C	-0.658274	-0.00402601	0.776798	FALSE	45161173	0.029884	0.0309553	5.89202e-07	0.127015	TRUE
Asv003[Staphylococcus (unc.)]	DISORDSKINAPPENDIX	Dry	rs716073	A	C	0.769835	-0.00471004	0.107966	FALSE	26467198	0.0303057	0.0412863	5.65581e-06	0.164306	TRUE
Asv003[Staphylococcus (unc.)]	DISORDSKINAPPENDIX	Dry	rs73111893	A	C	0.664653	-0.00169322	0.0875995	FALSE	52891746	0.0323419	0.0454101	7.97863e-06	0.144423	TRUE
Asv003[Staphylococcus (unc.)]	DISORDSKINAPPENDIX	Dry	rs7585118	T	G	-0.50346	-0.0651355	0.276454	FALSE	70364317	0.0010747	0.0304172	9.02e-06	0.110374	TRUE
Asv003[Staphylococcus (unc.)]	DISORDSKINAPPENDIX	Dry	rs2762525	C	T	0.526904	0.0672766	0.828259	FALSE	87657888	0.00210295	0.0361981	8.61e-06	0.115241	TRUE
Asv003[Staphylococcus (unc.)]	DISORDSKINAPPENDIX	Dry	rs35112016	A	G	0.668125	-0.0383662	0.0806973	FALSE	131784713	0.0146855	0.049746	4.31e-06	0.141228	TRUE
Asv003[Staphylococcus (unc.)]	DISORDSKINAPPENDIX	Dry	rs7911003	G	A	0.47278	0.0195831	0.24233	FALSE	108096273	0.0178891	0.0316955	5.98e-06	0.101538	TRUE
Asv003[Staphylococcus (unc.)]	DISORDSKINAPPENDIX	Dry	rs2321321	T	C	-0.437839	-0.013268	0.684188	FALSE	10995791	0.0217798	0.0295467	2.5e-06	0.0902172	TRUE
Asv003[Staphylococcus (unc.)]	DISORDSKINAPPENDIX	Dry	rs80229091	T	C	0.77104	0.00708622	0.136455	FALSE	43544225	0.0286053	0.0396501	9.92e-06	0.169865	TRUE
Asv003[Staphylococcus (unc.)]	DISORDSKINAPPENDIX	Dry	rs12056465	T	C	-0.513917	0.00125055	0.755648	FALSE	126516916	0.0322859	0.0317446	4.39e-06	0.108721	TRUE
Asv003[Staphylococcus (unc.)]	DISORDSKINAPPENDIX	Dry	rs257679	A	G	-0.515254	-0.000995756	0.638512	FALSE	124417970	0.0324002	0.0283738	9.08e-06	0.112999	TRUE
Asv003[Staphylococcus (unc.)]	DISORDSKINAPPENDIX	Dry	rs7911003	G	A	0.47278	-0.109112	0.242274	FALSE	108096273	0.0141921	0.117919	5.98237e-06	0.101538	TRUE
Asv003[Staphylococcus (unc.)]	DISORDSKINAPPENDIX	Dry	rs2321321	T	C	-0.437839	-0.0991395	0.684912	FALSE	10995791	0.0147852	0.110503	2.50025e-06	0.0902172	TRUE
Asv003[Staphylococcus (unc.)]	DISORDSKINAPPENDIX	Dry	rs80229091	T	C	0.77104	0.131094	0.136108	FALSE	43544225	0.0150395	0.148077	9.92314e-06	0.169865	TRUE
Asv003[Staphylococcus (unc.)]	DISORDSKINAPPENDIX	Dry	rs7585118	T	G	-0.50346	-0.0712259	0.276786	FALSE	70364317	0.0212197	0.113552	9.01809e-06	0.110374	TRUE
Asv003[Staphylococcus (unc.)]	DISORDSKINAPPENDIX	Dry	rs2762525	C	T	0.526904	-0.0617599	0.82871	FALSE	87657888	0.0259729	0.135824	8.60967e-06	0.115241	TRUE
Asv003[Staphylococcus (unc.)]	DISORDSKINAPPENDIX	Dry	rs12056465	T	C	-0.513917	-0.0407028	0.755978	FALSE	126516916	0.0292892	0.118959	4.3858e-06	0.108721	TRUE
Asv003[Staphylococcus (unc.)]	DISORDSKINAPPENDIX	Dry	rs35112016	A	G	0.668125	-0.0189759	0.0815456	FALSE	131784713	0.0367407	0.185489	4.31161e-06	0.141228	TRUE
Asv003[Staphylococcus (unc.)]	DISORDSKINAPPENDIX	Dry	rs257679	A	G	-0.515254	-0.00753769	0.638385	FALSE	124417970	0.0377385	0.106286	9.08024e-06	0.112999	TRUE
Asv003[Staphylococcus (unc.)]	DISORDSKINAPPENDIX	Dry	rs2093639	A	G	0.558619	0.055532	0.832105	FALSE	52952954	0.00426947	0.0364934	6.03e-06	0.120785	TRUE
Asv003[Staphylococcus (unc.)]	DISORDSKINAPPENDIX	Dry	rs7350909	C	T	0.487837	0.0458836	0.760947	FALSE	53706552	0.00499243	0.0318562	1.88e-06	0.0999341	TRUE
Asv003[Staphylococcus (unc.)]	DISORDSKINAPPENDIX	Dry	rs80124496	C	G	-0.815685	-0.0776755	0.0616001	FALSE	54379930	0.0057672	0.0570063	7.29e-06	0.178023	TRUE
Asv003[Staphylococcus (unc.)]	DISORDSKINAPPENDIX	Dry	rs2876674	A	T	0.425814	0.0370004	0.66487	FALSE	147965942	0.00664187	0.0288239	8.4e-06	0.0935942	TRUE
Asv003[Staphylococcus (unc.)]	DISORDSKINAPPENDIX	Dry	rs75626896	T	C	-0.825483	-0.109663	0.0211244	FALSE	27385811	0.0084248	0.0958834	4.58e-06	0.176135	TRUE
Asv003[Staphylococcus (unc.)]	DISORDSKINAPPENDIX	Dry	rs12215146	A	G	-0.536634	-0.0306288	0.153369	FALSE	132281326	0.0139863	0.0379477	1.81e-06	0.109729	TRUE
Asv003[Staphylococcus (unc.)]	DISORDSKINAPPENDIX	Dry	rs194033	A	G	-0.52463	-0.0170068	0.828238	FALSE	13194217	0.0212541	0.036106	7.12e-06	0.114365	TRUE
Asv003[Staphylococcus (unc.)]	DISORDSKINAPPENDIX	Dry	rs6905678	G	C	0.469509	-0.0109848	0.374908	FALSE	52088393	0.0232171	0.028164	1.65e-06	0.0956158	TRUE
Asv003[Staphylococcus (unc.)]	DISORDSKINAPPENDIX	Dry	rs481266	C	A	0.545281	-0.0125159	0.840965	FALSE	13056246	0.0245346	0.037128	4.36e-06	0.116082	TRUE
Asv003[Staphylococcus (unc.)]	DISORDSKINAPPENDIX	Dry	rs2835522	A	T	0.49573	0.00450559	0.174684	FALSE	36878717	0.0300011	0.0358671	7.36e-06	0.108244	TRUE
Asv003[Staphylococcus (unc.)]	DISORDSKINAPPENDIX	Dry	rs7031650	G	T	-0.785291	0.00400139	0.0955651	FALSE	27224429	0.0310491	0.0465321	2.47e-06	0.162847	TRUE
Asv003[Staphylococcus (unc.)]	DISORDSKINAPPENDIX	Dry	rs481266	C	A	0.545281	-0.318009	0.840717	FALSE	13056246	0.000870724	0.138603	4.35961e-06	0.116082	TRUE
Asv003[Staphylococcus (unc.)]	DISORDSKINAPPENDIX	Dry	rs12215146	A	G	-0.536634	-0.227071	0.153099	FALSE	132281326	0.00440068	0.142087	1.8052e-06	0.109729	TRUE
Asv003[Staphylococcus (unc.)]	DISORDSKINAPPENDIX	Dry	rs2876674	A	T	0.425814	-0.141709	0.664063	FALSE	147965942	0.00747564	0.107369	8.40429e-06	0.0935942	TRUE
Asv003[Staphylococcus (unc.)]	DISORDSKINAPPENDIX	Dry	rs2835522	A	T	0.49573	-0.143518	0.174528	FALSE	36878717	0.011454	0.134612	7.35995e-06	0.108244	TRUE
Asv003[Staphylococcus (unc.)]	DISORDSKINAPPENDIX	Dry	rs75626896	T	C	-0.825483	-0.28457	0.0210214	FALSE	27385811	0.017304	0.362626	4.57523e-06	0.176135	TRUE
Asv003[Staphylococcus (unc.)]	DISORDSKINAPPENDIX	Dry	rs6905678	G	C	0.469509	-0.076371	0.376275	FALSE	52088393	0.0187254	0.105265	1.64656e-06	0.0956158	TRUE
Asv003[Staphylococcus (unc.)]	DISORDSKINAPPENDIX	Moist	rs80124496	C	G	-0.815685	-0.12477	0.0615828	FALSE	54379930	0.022237	0.211869	7.29048e-06	0.178023	TRUE
Asv003[Staphylococcus (unc.)]	DISORDSKINAPPENDIX	Moist	rs194033	A	G	-0.52463	-0.0752433	0.827684	FALSE	13194217	0.0231156	0.135216	7.11853e-06	0.114365	TRUE
Asv003[Staphylococcus (unc.)]	DISORDSKINAPPENDIX	Moist	rs2093639	A	G	0.558619	-0.0732249	0.831718	FALSE	52952954	0.0236401	0.136262	6.02722e-06	0.120785	TRUE
Asv003[Staphylococcus (unc.)]	DISORDSKINAPPENDIX	Moist	rs7350909	C	T	0.487837	0.0435447	0.760428	FALSE	53706552	0.0285898	0.11914	1.88168e-06	0.0999341	TRUE
Asv003[Staphylococcus (unc.)]	DISORDSKINAPPENDIX	Moist	rs7031650	G	T	-0.785291	0.0298759	0.0956307	FALSE	27224429	0.0345941	0.175533	2.47316e-06	0.162847	TRUE
Asv003[Staphylococcus (unc.)]	DISORDSKINAPPENDIX	Moist	rs1468231	C	T	-0.425337	0.0725895	0.733662	FALSE	104571665	0.0182911	0.0307626	4.8349e-06	0.0908453	TRUE
Asv003[Staphylococcus (unc.)]	DISORDSKINAPPENDIX	Moist	rs10999373	A	G	0.802264	0.127907	0.160643	FALSE	70525731	0.0429309	0.063183	3.02206e-06	0.167608	TRUE
Asv003[Staphylococcus (unc.)]	DISORDSKINAPPENDIX	Moist	rs488612	T	C	-0.50132	-0.0792877	0.765239	FALSE	194071928	0.0145312	0.0324437	6.96797e-06	0.108996	TRUE
Asv003[Staphylococcus (unc.)]	DISORDSKINAPPENDIX	Moist	rs2977806	T	C	-0.467446	-0.171597	0.490762	FALSE	6835446	0.0146954	0.0703323	1.17752e-07	0.085497	TRUE
Asv003[Staphylococcus (unc.)]	DISORDSKINAPPENDIX	Moist	rs10999373	A	G	0.802264	0.204831	0.16076	FALSE	70525731	0.0314051	0.0951861	3.02206e-06	0.167608	TRUE
Asv003[Staphylococcus (unc.)]	DISORDSKINAPPENDIX	Moist	rs56865570	T	C	0.652255	-0.104309	0.0891489	FALSE	1654566	0.00206253	0.0338546	9.46508e-06	0.144005	TRUE
Asv003[Staphylococcus (unc.)]	DISORDSKINAPPENDIX	Moist	rs56865570	T	C	0.652255	-0.0802424	0.0893402	FALSE	1654566	0.0340565	0.0378609	9.46508e-06	0.144005	TRUE
Asv003[Staphylococcus (unc.)]	DISORDSKINAPPENDIX	Moist	rs957231	A	G	0.609772	-0.0403741	0.139904	FALSE	150999132	0.0277811	0.0183489	1.00152e-06	0.121327	TRUE
Asv003[Staphylococcus (unc.)]	DISORDSKINAPPENDIX	Moist	rs957231	A	G	0.609772	0.209858	0.139771	FALSE	150999132	0.00714184	0.0780094	1.00152e-06	0.121327	TRUE
Asv003[Staphylococcus (unc.)]	DISORDSKINAPPENDIX	Moist	rs2183307	C	T	0.676114	0.106325	0.909378	FALSE	857617	0.0102376	0.0414088	9.66574e-07	0.134325	TRUE
Asv003[Staphylococcus (unc.)]	DISORDSKINAPPENDIX	Moist	rs1468231	C	T	-0.425337	0.0278133	0.733705	FALSE	104571665	0.00100014	0.01691	4.8349e-06	0.0908453	TRUE
Asv003[Staphylococcus (unc.)]	DISORDSKINAPPENDIX	Moist	rs2183307	C	T	0.676114	-0.03528	0.909223	FALSE	857617	0.00174886	0.0260049	9.66574e-07	0.134325	TRUE
Asv003[Staphylococcus (unc.)]	DISORDSKINAPPENDIX	Moist	rs7215354	G	A	-0.475253	-0.0174069	0.720552	FALSE	50644879	0.00299542	0.0167791	6.62885e-06	0.103074	TRUE
Asv003[Staphylococcus (unc.)]	DISORDSKINAPPENDIX	Moist	rs957231	A	G	0.609772	0.0190602	0.139809	FALSE	150999132	0.00378512	0.0216436	1.00152e-06	0.121327	TRUE
Asv003[Staphylococcus (unc.)]	DISORDSKINAPPENDIX	Moist	rs2977806	T	C	-0.467446	-0.0111915	0.490668	FALSE	6835446	0.00456783	0.0150393	1.17752e-07	0.085497	TRUE
Asv003[Staphylococcus (unc.)]	DISORDSKINAPPENDIX	Moist	rs56865570	T	C	0.652255	0.0162961	0.089155	FALSE	1654566	0.00534258	0.0262198	9.46508e-06	0.144005	TRUE
Asv003[Staphylococcus (unc.)]	DISORDSKINAPPENDIX	Moist	rs3912612	T	C	0.516947	0.00241168	0.28307	FALSE	8196625	0.00884321	0.0165758	3.70698e-07	0.098763	TRUE
Asv003[Staphylococcus (unc.)]	DISORDSKINAPPENDIX	Moist	rs10999373	A	G	0.802264	0.00074355	0.160743	FALSE	70525731	0.00970951	0.0204187	3.02206e-06	0.167608	TRUE
Asv003[Staphylococcus (unc.)]	DISORDSKINAPPENDIX	Moist	rs488612	T	C	-0.50132	-0.000537642	0.764923	FALSE	194071928	0.00975693	0.0176459	6.96797e-06	0.108996	TRUE
Asv003[Staphylococcus (unc.)]	DISORDSKINAPPENDIX	Moist	rs10999373	A	G	0.802264	-0.0352929	0.161213	FALSE	70525731	0.000451658	0.0154765	3.02206e-06	0.167608	TRUE
Asv003[Staphylococcus (unc.)]	DISORDSKINAPPENDIX	Moist	rs1468231	C	T	-0.425337	-0.0270221	0.734038	FALSE	104571665	0.00068813	0.0127747	4.8349e-06	0.0908453	TRUE
Asv003[Staphylococcus (unc.)]	DISORDSKINAPPENDIX	Moist	rs7215354	G	A	-0.475253	-0.0197987	0.720983	FALSE	50644879	0.00239116	0.0127189	6.62885e-06	0.103074	TRUE
Asv003[Staphylococcus (unc.)]	DISORDSKINAPPENDIX	Moist	rs56865570	T	C	0.652255	-0.00886911	0.0891814	FALSE	1654566	0.01309	0.0198184	9.46508e-06	0.144005	TRUE
Asv003[Staphylococcus (unc.)]	DISORDSKINAPPENDIX	Moist	rs3912612	T	C	0.516947	-0.00477689	0.283539	FALSE	8196625	0.0140761	0.0125644	3.70698e-07	0.098763	TRUE
Asv003[Staphylococcus (unc.)]	DISORDSKINAPPENDIX	Moist	rs2977806	T	C	-0.467446	-0.00262265	0.490624	FALSE	6835446	0.0163585	0.0113923	1.17752e-07	0.085497	TRUE
Asv003[Staphylococcus (unc.)]	DISORDSKINAPPENDIX	Moist	rs2183307	C	T	0.676114	0.00446239	0.909481	FALSE	857617	0.0164238	0.0197437	9.66574e-07	0.134325	TRUE
Asv003[Staphylococcus (unc.)]	DISORDSKINAPPENDIX	Moist	rs488612	T	C	-0.50132	-0.00263267	0.764304	FALSE	194071928	0.0168764	0.0133632	6.96797e-06	0.108996	TRUE
Asv003[Staphylococcus (unc.)]	DISORDSKINAPPENDIX	Moist	rs957231	A	G	0.609772	-0.0019249	0.139445	FALSE	150999132	0.018132	0.0164061	1.00152e-06	0.121327	TRUE
Asv003[Staphylococcus (unc.)]	DISORDSKINAPPENDIX	Moist	rs7215354	G	A	-0.475253	-0.0685605	0.721132	FALSE	50644879	0.000498425	0.0294563	6.62885e-06	0.103074	TRUE
Asv003[Staphylococcus (unc.)]	DISORDSKINAPPENDIX	Moist	rs957231	A	G	0.609772	-0.0644391	0.139308	FALSE	150999132	0.00224621	0.0379903	1.00152e-06	0.121327	TRUE
Asv003[Staphylococcus (unc.)]	DISORDSKINAPPENDIX	Moist	rs10999373	A	G	0.802264	-0.0281596	0.161538	FALSE	70525731	0.0108006	0.0358387	3.02206e-06	0.167608	TRUE
Asv003[Staphylococcus (unc.)]	DISORDSKINAPPENDIX	Moist	rs2183307	C	T	0.676114	-0.0310567	0.909411	FALSE	857617	0.0123877	0.0455662	9.66574e-07	0.134325	TRUE
Asv003[Staphylococcus (unc.)]	DISORDSKINAPPENDIX	Moist	rs2977806	T	C	-0.467446	-0.015509	0.490675	FALSE	6835446	0.0139122	0.0263726	1.17752e-07	0.085497	TRUE
Asv003[Staphylococcus (unc.)]	DISORDSKINAPPENDIX	Moist	rs1468231	C	T	-0.425337	-0.0149185	0.734394	FALSE	104571665	0.0153383	0.0295394	4.8349e-06	0.0908453	TRUE
Asv003[Staphylococcus (unc.)]	DISORDSKINAPPENDIX	Moist	rs3912612	T	C	0.516947	-0.00592972	0.283559	FALSE	8196625	0.0209617	0.029088	3.70698e-07	0.098763	TRUE
Asv003[Staphylococcus (unc.)]	DISORDSKINAPPENDIX	Moist	rs56865570	T	C	0.652255	-0.00919647	0.0891504	FALSE	1654566	0.0210353	0.0459618	9.46508e-06	0.144005	TRUE
Asv003[Staphylococcus (unc.)]	DISORDSKINAPPENDIX	Moist	rs488612	T	C	-0.50132	-0.00266702	0.76419	FALSE	194071928	0.0232868	0.0310136	6.96797e-06	0.108996	TRUE
Asv003[Staphylococcus (unc.)]	DISORDSKINAPPENDIX	Moist	rs2977806	T	C	-0.467446	0.0482978	0.49087	FALSE	6835446	0.00207472	0.0259029	1.17752e-07	0.085497	TRUE
Asv003[Staphylococcus (unc.)]	DISORDSKINAPPENDIX	Moist	rs3912612	T	C	0.516947	-0.0456606	0.283478	FALSE	8196625	0.00365727	0.0285474	3.70698e-07	0.098763	TRUE
Asv003[Staphylococcus (unc.)]	DISORDSKINAPPENDIX	Moist	rs2183307	C	T	0.676114	0.0491343	0.909481	FALSE	857617	0.00909863	0.0448194	9.66574e-07	0.134325	TRUE
Asv003[Staphylococcus (unc.)]	DISORDSKINAPPENDIX	Moist	rs56865570	T	C	0.652255	-0.0479797	0.0891208	FALSE	1654566	0.00957707	0.0450921	9.46508e-06	0.144005	TRUE
Asv003[Staphylococcus (unc.)]	DISORDSKINAPPENDIX	Moist	rs488612	T	C	-0.50132	-0.0318825	0.764147	FALSE	194071928	0.0098012	0.0303842	6.96797e-06	0.108996	TRUE
Asv003[Staphylococcus (unc.)]	DISORDSKINAPPENDIX	Moist	rs1468231	C	T	-0.425337	-0.0154362	0.734392	FALSE	104571665	0.0198131	0.0289892	4.8349e-06	0.0908453	TRUE
Asv003[Staphylococcus (unc.)]	DISORDSKINAPPENDIX	Moist	rs957231	A	G	0.609772	-0.0161741	0.139391	FALSE	150999132	0.0220717	0.0370163	1.00152e-06	0.121327	TRUE
Asv006[S. Hominis]	DISORDSKINAPPENDIX	Dry	rs10999373	A	G	0.802264	0.0122922	0.16159	FALSE	70525731	0.024223	0.0351679	3.02206e-06	0.167608	TRUE
Asv006[S. Hominis]	DISORDSKINAPPENDIX	Dry	rs7215354	G	A	-0.475253	0.00762026	0.721287	FALSE	50644879	0.0263994	0.0288936	6.62885e-06	0.103074	TRUE
Asv006[S. Hominis]	DISORDSKINAPPENDIX	Dry	rs10926615	G	A	0.449978	-0.0282666	0.608696	FALSE	242067243	0.0158855	0.0117214	5.30128e-06	0.0961402	TRUE
Asv006[S. Hominis]	DISORDSKINAPPENDIX	Dry	rs9387433	T	C	0.695093	0.307536	0.200634	FALSE	116756287	0.0436224	0.152419	1.92751e-06	0.141656	TRUE
Asv006[S. Hominis]	DISORDSKINAPPENDIX	Dry	rs1202521	C	A	0.440974	-0.0932658	0.357797	FALSE	230812560	0.00326919	0.0317099	6.31949e-06	0.0950316	TRUE
Asv006[S. Hominis]	DISORDSKINAPPENDIX	Dry	rs17651452	A	G	-0.818072	0.372048	0.0863787	FALSE	93424153	0.0333043	0.174802	8.87105e-06	0.17932	TRUE
Asv006[S. Hominis]	DISORDSKINAPPENDIX	Dry	rs10926615	G	A	0.449978	-0.0409798	0.608856	FALSE	242067243	0.0390913	0.019862	5.30128e-06	0.0961402	TRUE
Asv006[S. Hominis]	DISORDSKINAPPENDIX	Dry	rs17651452	A	G	-0.818072	-0.0961047	0.0864113	FALSE	93424153	0.00492312	0.0341763	8.87105e-06	0.17932	TRUE
Asv006[S. Hominis]	DISORDSKINAPPENDIX	Dry	rs10926615	G	A	0.449978	-0.0507194	0.608731	FALSE	242067243	0.00840853	0.0192468	5.30128e-06	0.0961402	TRUE
Asv006[S. Hominis]	DISORDSKINAPPENDIX	Dry	rs12660615	T	C	0.702671	-0.0956189	0.157972	FALSE	168754365	0.0220277	0.041757	4.63185e-06	0.149152	TRUE
Asv006[S. Hominis]	DISORDSKINAPPENDIX	Dry	rs1867981	T	C	-0.462146	-0.014845	0.517178	FALSE	71835464	0.0466155	0.00746064	3.30484e-06	0.0965381	TRUE
Asv006[S. Hominis]	DISORDSKINAPPENDIX	Dry	rs12660615	T	C	0.702671	0.065177	0.157953	FALSE	168754365	0.0447311	0.032472	4.63185e-06	0.149152	TRUE
Asv006[S. Hominis]	DISORDSKINAPPENDIX	Dry	rs1006666	C	T	0.641297	-0.0900877	0.122715	FALSE	126166203	0.0410006	0.0440844	3.57882e-06	0.134463	TRUE
Asv006[S. Hominis]	DISORDSKINAPPENDIX	Dry	rs1006666	C	T	0.641297	0.1923	0.122766	FALSE	126166203	0.0493935	0.0978538	3.57882e-06	0.134463	TRUE
Asv006[S. Hominis]	DISORDSKINAPPENDIX	Dry	rs12660615	T	C	0.702671	0.292827	0.157877	FALSE	168754365	0.0412791	0.143493	4.63185e-06	0.149152	TRUE
Asv006[S. Hominis]	DISORDSKINAPPENDIX	Dry	rs9387433	T	C	0.695093	0.0321506	0.200811	FALSE	116756287	0.000855323	0.0186982	1.92751e-06	0.141656	TRUE
Asv006[S. Hominis]	DISORDSKINAPPENDIX	Dry	rs1006666	C	T	0.641297	0.0296804	0.122802	FALSE	126166203	0.00195124	0.0229092	3.57882e-06	0.134463	TRUE
Asv006[S. Hominis]	DISORDSKINAPPENDIX	Dry	rs17651452	A	G	-0.818072	-0.0163497	0.0863762	FALSE	93424153	0.00539026	0.0266157	8.87105e-06	0.17932	TRUE
Asv006[S. Hominis]	DISORDSKINAPPENDIX	Dry	rs1202521	C	A	0.440974	-0.00841528	0.357874	FALSE	230812560	0.00590258	0.0156284	6.31949e-06	0.0950316	TRUE
Asv006[S. Hominis]	DISORDSKINAPPENDIX	Dry	rs1867981	T	C	-0.462146	0.00444414	0.517237	FALSE	71835464	0.00766053	0.0149362	3.30484e-06	0.0965381	TRUE
Asv006[S. Hominis]	DISORDSKINAPPENDIX	Dry	rs12660615	T	C	0.702671	0.00499419	0.157872	FALSE	168754365	0.00806826	0.0204242	4.63185e-06	0.149152	TRUE
Asv006[S. Hominis]	DISORDSKINAPPENDIX	Dry	rs10926615	G	A	0.449978	0.00118465	0.608775	FALSE	242067243	0.00938483	0.0153497	5.30128e-06	0.0961402	TRUE
Asv006[S. Hominis]	DISORDSKINAPPENDIX	Dry	rs10014782	A	T	-0.495639	0.000769241	0.401778	FALSE	6031211	0.00960006	0.0153401	5.84194e-06	0.1064	TRUE
Asv006[S. Hominis]	DISORDSKINAPPENDIX	Dry	rs10014782	A	T	-0.495639	-0.018358	0.402101	FALSE	6031211	0.00228214	0.011619	5.84194e-06	0.1064	TRUE
Asv006[S. Hominis]	DISORDSKINAPPENDIX	Dry	rs1867981	T	C	-0.462146	0.0160936	0.517242	FALSE	71835464	0.00309894	0.0113154	3.30484e-06	0.0965381	TRUE
Asv006[S. Hominis]	DISORDSKINAPPENDIX	Dry	rs1202521	C	A	0.440974	-0.0129141	0.357858	FALSE	230812560	0.00550592	0.0118375	6.31949e-06	0.0950316	TRUE
Asv006[S. Hominis]	DISORDSKINAPPENDIX	Dry	rs10926615	G	A	0.449978	-0.00940436	0.608428	FALSE	242067243	0.00838064	0.0116376	5.30128e-06	0.0961402	TRUE
Asv006[S. Hominis]	DISORDSKINAPPENDIX	Dry	rs17651452	A	G	-0.818072	-0.0155404	0.0863933	FALSE	93424153	0.00880254	0.0201306	8.87105e-06	0.17932	TRUE
Asv006[S. Hominis]	DISORDSKINAPPENDIX	Dry	rs1006666	C	T	0.641297	-0.009643	0.122861	FALSE	126166203	0.0115783	0.0173757	3.57882e-06	0.134463	TRUE
Asv006[S. Hominis]	DISORDSKINAPPENDIX	Dry	rs12660615	T	C	0.702671	-0.00069939	0.157708	FALSE	168754365	0.0192814	0.0155265	4.63185e-06	0.149152	TRUE
Asv006[S. Hominis]	DISORDSKINAPPENDIX	Dry	rs9387433	T	C	0.695093	-0.000457175	0.200995	FALSE	116756287	0.0194868	0.0142143	1.92751e-06	0.141656	TRUE
Asv006[S. Hominis]	DISORDSKINAPPENDIX	Dry	rs12660615	T	C	0.702671	0.0695257	0.157825	FALSE	168754365	0.00131223	0.0358547	4.63185e-06	0.149152	TRUE
Asv006[S. Hominis]	DISORDSKINAPPENDIX	Dry	rs9387433	T	C	0.695093	-0.0557501	0.201019	FALSE	116756287	0.00225471	0.0329025	1.92751e-06	0.141656	TRUE
Asv006[S. Hominis]	DISORDSKINAPPENDIX	Dry	rs10014782	A	T	-0.495639	-0.0272177	0.40229	FALSE	6031211	0.00777585	0.026867	5.84194e-06	0.1064	TRUE
Asv006[S. Hominis]	DISORDSKINAPPENDIX	Dry	rs1867981	T	C	-0.462146	-0.0264672	0.516955	FALSE	71835464	0.00780287	0.0261845	3.30484e-06	0.0965381	TRUE
Asv006[S. Hominis]	DISORDSKINAPPENDIX	Dry	rs1202521	C	A	0.440974	0.0242145	0.358053	FALSE	230812560	0.00942338	0.0274057	6.31949e-06	0.0950316	TRUE
Asv006[S. Hominis]	DISORDSKINAPPENDIX	Dry	rs10926615	G	A	0.449978	-0.0210517	0.608396	FALSE	242067243	0.0108583	0.0269273	5.30128e-06	0.0961402	TRUE
Asv006[S. Hominis]	DISORDSKINAPPENDIX	Dry	rs1006666	C	T	0.641297	0.021863	0.122996	FALSE	126166203	0.0146736	0.0402433	3.57882e-06	0.134463	TRUE
Asv006[S. Hominis]	DISORDSKINAPPENDIX	Dry	rs17651452	A	G	-0.818072	-0.00635503	0.0864406	FALSE	93424153	0.0222899	0.0466312	8.87105e-06	0.17932	TRUE
Asv006[S. Hominis]	DISORDSKINAPPENDIX	Dry	rs1202521	C	A	0.440974	-0.0483586	0.357887	FALSE	230812560	0.0024053	0.0268941	6.31949e-06	0.0950316	TRUE
Asv006[S. Hominis]	DISORDSKINAPPENDIX	Dry	rs9387433	T	C	0.695093	0.0434013	0.201178	FALSE	116756287	0.0059981	0.0323665	1.92751e-06	0.141656	TRUE
Asv006[S. Hominis]	DISORDSKINAPPENDIX	Dry	rs1867981	T	C	-0.462146	-0.0213285	0.516938	FALSE	71835464	0.0135387	0.0256762	3.30484e-06	0.0965381	TRUE
Asv006[S. Hominis]	DISORDSKINAPPENDIX	Dry	rs10926615	G	A	0.449978	-0.0214866	0.608391	FALSE	242067243	0.0139098	0.0264898	5.30128e-06	0.0961402	TRUE
Asv006[S. Hominis]	DISORDSKINAPPENDIX	Dry	rs10014782	A	T	-0.495639	0.0150724	0.402422	FALSE	6031211	0.0189363	0.0264025	5.84194e-06	0.1064	TRUE
Asv006[S. Hominis]	DISORDSKINAPPENDIX	Dry	rs17651452	A	G	-0.818072	0.0172261	0.0864642	FALSE	93424153	0.0235277	0.0456365	8.87105e-06	0.17932	TRUE
Asv006[S. Hominis]	DISORDSKINAPPENDIX	Dry	rs1006666	C	T	0.641297	0.00925506	0.122984	FALSE	126166203	0.027149	0.03944	3.57882e-06	0.134463	TRUE
Asv006[S. Hominis]	DISORDSKINAPPENDIX	Dry	rs12660615	T	C	0.702671	-0.00735181	0.157707	FALSE	168754365	0.0278416	0.0353494	4.63185e-06	0.149152	TRUE
Asv006[S. Hominis]	DISORDSKINAPPENDIX	Dry	rs2031959	G	T	0.564889	0.0846224	0.223306	FALSE	101246227	0.000265435	0.0318893	2.97e-06	0.117258	TRUE
Asv006[S. Hominis]	DISORDSKINAPPENDIX	Dry	rs1369450	C	A	0.535759	-0.032762	0.528751	FALSE	130880476	0.007623	0.0272169	2.98e-07	0.1008	TRUE
Asv013[S. Epidermidis]	DISORDSKINAPPENDIX	Moist	rs2542423	C	G	-0.474999	0.019671	0.399078	FALSE	139623445	0.0159697	0.0277932	5.35e-06	0.101396	TRUE
Asv013[S. Epidermidis]	DISORDSKINAPPENDIX	Moist	rs1209	T	G	0.482444	-0.0146362	0.686792	FALSE	118193795	0.0205703	0.0292752	5.13e-07	0.092764	TRUE
Asv013[S. Epidermidis]	DISORDSKINAPPENDIX	Moist	rs12279795	G	A	-0.525157	0.0150052	0.268368	FALSE	5985658	0.0208051	0.0306247	6.84e-06	0.11347	TRUE
Asv013[S. Epidermidis]	DISORDSKINAPPENDIX	Moist	rs6445168	T	C	-0.53244	-0.0140039	0.291056	FALSE	174432514	0.0213173	0.0298992	1.26e-06	0.106336	TRUE
Asv013[S. Epidermidis]	DISORDSKINAPPENDIX	Moist	rs12279795	G	A	-0.525157	-0.140084	0.267595	FALSE	5985658	0.00886568	0.114619	6.83944e-06	0.11347	TRUE
Asv013[S. Epidermidis]	DISORDSKINAPPENDIX	Moist	rs1369450	C	A	0.535759	-0.0505161	0.528832	FALSE	130880476	0.0247246	0.101332	2.98489e-07	0.1008	TRUE
Asv013[S. Epidermidis]	DISORDSKINAPPENDIX	Moist	rs2031959	G	T	0.564889	0.0483787	0.223344	FALSE	101246227	0.0276173	0.121472	2.97445e-06	0.117258	TRUE
Asv013[S. Epidermidis]	DISORDSKINAPPENDIX	Moist	rs6445168	T	C	-0.53244	-0.0167073	0.291441	FALSE	174432514	0.0352588	0.11205	1.26152e-06	0.106336	TRUE
Asv013[S. Epidermidis]	DISORDSKINAPPENDIX	Moist	rs1209	T	G	0.482444	0.00955052	0.686957	FALSE	118193795	0.0372158	0.109338	5.13255e-07	0.092764	TRUE
Asv013[S. Epidermidis]	DISORDSKINAPPENDIX	Moist	rs2542423	C	G	-0.474999	-0.00124501	0.39981	FALSE	139623445	0.0396184	0.10413	5.34973e-06	0.101396	TRUE
Asv013[S. Epidermidis]	DISORDSKINAPPENDIX	Moist	rs165614	C	A	0.501556	0.0293985	0.197197	FALSE	20581386	0.0405406	0.0143533	4.23611e-06	0.106569	TRUE
Asv013[S. Epidermidis]	DISORDSKINAPPENDIX	Moist	rs614689	C	G	-0.40174	-0.0993853	0.659693	FALSE	85122793	0.00416217	0.0346822	9.22764e-06	0.0887412	TRUE
Asv013[S. Epidermidis]	DISORDSKINAPPENDIX	Moist	rs10004131	T	C	0.450069	-0.0921373	0.199637	FALSE	46955159	0.0279049	0.0419069	7.32041e-06	0.098239	TRUE
Asv013[S. Epidermidis]	DISORDSKINAPPENDIX	Moist	rs11119610	G	C	0.39017	0.0695416	0.367434	FALSE	210824026	0.0454726	0.0347664	8.73703e-06	0.0859413	TRUE
Asv013[S. Epidermidis]	DISORDSKINAPPENDIX	Moist	rs1370396	A	C	-0.458127	0.0795167	0.238292	FALSE	59832064	0.0134301	0.0321649	1.20324e-06	0.0920672	TRUE
Asv013[S. Epidermidis]	DISORDSKINAPPENDIX	Moist	rs1952634	T	C	0.769555	-0.152372	0.938503	FALSE	24534501	0.00973106	0.0589391	6.7805e-06	0.167399	TRUE
Asv013[S. Epidermidis]	DISORDSKINAPPENDIX	Moist	rs78273222	T	C	0.614181	0.11041	0.127101	FALSE	3757622	0.0107741	0.043299	7.33246e-06	0.133987	TRUE
Asv013[S. Epidermidis]	DISORDSKINAPPENDIX	Moist	rs165614	C	A	0.501556	0.0567349	0.197132	FALSE	20581386	0.0197038	0.0243295	4.23611e-06	0.106569	TRUE
Asv013[S. Epidermidis]	DISORDSKINAPPENDIX	Moist	rs614689	C	G	-0.40174	-0.0618618	0.659574	FALSE	85122793	0.00180302	0.0198218	9.22764e-06	0.0887412	TRUE
Asv013[S. Epidermidis]	DISORDSKINAPPENDIX	Moist	rs2904413	A	G	0.399973	0.0577688	0.515843	FALSE	79244098	0.00786158	0.0217343	1.77981e-06	0.0817576	TRUE
Asv013[S. Epidermidis]	DISORDSKINAPPENDIX	Moist	rs165614	C	A	0.501556	-0.0577601	0.197161	FALSE	20581386	0.0343084	0.0272913	4.23611e-06	0.106569	TRUE
Asv013[S. Epidermidis]	DISORDSKINAPPENDIX	Moist	rs11119610	G	C	0.39017	0.0457889	0.367591	FALSE	210824026	0.0426148	0.0225843	8.73703e-06	0.0859413	TRUE
Asv013[S. Epidermidis]	DISORDSKINAPPENDIX	Moist	rs10004131	T	C	0.450069	-0.0368398	0.200119	FALSE	46955159	0.0207439	0.01593	7.32041e-06	0.098239	TRUE
Asv013[S. Epidermidis]	DISORDSKINAPPENDIX	Moist	rs72700065	A	G	-0.8072	-0.0418554	0.125808	FALSE	24123727	0.0283818	0.0190949	4.26664e-06	0.171434	TRUE
Asv013[S. Epidermidis]	DISORDSKINAPPENDIX	Moist	rs10004131	T	C	0.450069	-0.032545	0.199617	FALSE	46955159	0.000595868	0.00947871	7.32041e-06	0.098239	TRUE
Asv013[S. Epidermidis]	DISORDSKINAPPENDIX	Moist	rs1952634	T	C	0.769555	0.0357176	0.938503	FALSE	24534501	0.021713	0.0155608	6.7805e-06	0.167399	TRUE
Asv013[S. Epidermidis]	DISORDSKINAPPENDIX	Moist	rs72700065	A	G	-0.8072	-0.297229	0.125912	FALSE	24123727	0.0076768	0.11149	4.26664e-06	0.171434	TRUE
Asv013[S. Epidermidis]	DISORDSKINAPPENDIX	Moist	rs78273222	T	C	0.614181	0.0711606	0.127132	FALSE	3757622	0.047139	0.0358483	7.33246e-06	0.133987	TRUE
Asv013[S. Epidermidis]	DISORDSKINAPPENDIX	Moist	rs72700065	A	G	-0.8072	0.100113	0.125954	FALSE	24123727	0.022105	0.0437451	4.26664e-06	0.171434	TRUE
Asv013[S. Epidermidis]	DISORDSKINAPPENDIX	Moist	rs72700065	A	G	-0.8072	-0.211791	0.125886	FALSE	24123727	0.0300006	0.0975957	4.26664e-06	0.171434	TRUE
Asv013[S. Epidermidis]	DISORDSKINAPPENDIX	Moist	rs11195220	A	T	0.699239	0.198741	0.117831	FALSE	110608863	0.045062	0.0991685	6.97381e-06	0.152301	TRUE
Asv013[S. Epidermidis]	DISORDSKINAPPENDIX	Moist	rs72700065	A	G	-0.8072	-0.356756	0.125897	FALSE	24123727	0.0253081	0.159504	4.26664e-06	0.171434	TRUE
Asv013[S. Epidermidis]	DISORDSKINAPPENDIX	Moist	rs116139915	C	T	0.740165	-0.0478524	0.130006	FALSE	4787922	0.0317066	0.0222767	9.5705e-06	0.16373	TRUE
Asv013[S. Epidermidis]	DISORDSKINAPPENDIX	Moist	rs71641023	C	A	0.927851	0.055378	0.0856879	FALSE	94689342	0.0391156	0.0268439	6.76552e-08	0.166669	TRUE
Asv013[S. Epidermidis]	DISORDSKINAPPENDIX	Moist	rs10004131	T	C	0.450069	-0.0309521	0.199659	FALSE	46955159	0.000990171	0.0187629	7.32041e-06	0.098239	TRUE
Asv013[S. Epidermidis]	DISORDSKINAPPENDIX	Moist	rs1952634	T	C	0.769555	0.0404395	0.938499	FALSE	24534501	0.00193027	0.0310672	6.7805e-06	0.167399	TRUE
Asv013[S. Epidermidis]	DISORDSKINAPPENDIX	Moist	rs11195220	A	T	0.699239	-0.0232323	0.117746	FALSE	110608863	0.00316036	0.0231712	6.97381e-06	0.152301	TRUE
Asv013[S. Epidermidis]	DISORDSKINAPPENDIX	Moist	rs2904413	A	G	0.399973	-0.0137672	0.516134	FALSE	79244098	0.00358748	0.015001	1.77981e-06	0.0817576	TRUE
Asv013[S. Epidermidis]	DISORDSKINAPPENDIX	Moist	rs614689	C	G	-0.40174	-0.00661888	0.659582	FALSE	85122793	0.00674876	0.0157793	9.22764e-06	0.0887412	TRUE
Asv013[S. Epidermidis]	DISORDSKINAPPENDIX	Moist	rs78273222	T	C	0.614181	-0.00794969	0.127033	FALSE	3757622	0.00724199	0.0225297	7.33246e-06	0.133987	TRUE
Asv013[S. Epidermidis]	DISORDSKINAPPENDIX	Moist	rs1370396	A	C	-0.458127	0.00367393	0.238339	FALSE	59832064	0.00834749	0.0176111	1.20324e-06	0.0920672	TRUE
Asv013[S. Epidermidis]	DISORDSKINAPPENDIX	Moist	rs11119610	G	C	0.39017	0.00203596	0.367525	FALSE	210824026	0.0089585	0.0155529	8.73703e-06	0.0859413	TRUE
Asv013[S. Epidermidis]	DISORDSKINAPPENDIX	Moist	rs72700065	A	G	-0.8072	0.00191726	0.125923	FALSE	24123727	0.00932646	0.0226852	4.26664e-06	0.171434	TRUE
Asv013[S. Epidermidis]	DISORDSKINAPPENDIX	Moist	rs165614	C	A	0.501556	-0.000690545	0.197231	FALSE	20581386	0.00970705	0.0188035	4.23611e-06	0.106569	TRUE
Asv013[S. Epidermidis]	DISORDSKINAPPENDIX	Moist	rs1952634	T	C	0.769555	0.0510233	0.938549	FALSE	24534501	0.000587408	0.0234215	6.7805e-06	0.167399	TRUE
Asv013[S. Epidermidis]	DISORDSKINAPPENDIX	Moist	rs72700065	A	G	-0.8072	-0.0369945	0.125874	FALSE	24123727	0.000630928	0.0172059	4.26664e-06	0.171434	TRUE
Asv013[S. Epidermidis]	DISORDSKINAPPENDIX	Moist	rs165614	C	A	0.501556	-0.0264972	0.197097	FALSE	20581386	0.00128015	0.0143063	4.23611e-06	0.106569	TRUE
Asv013[S. Epidermidis]	DISORDSKINAPPENDIX	Moist	rs614689	C	G	-0.40174	-0.015305	0.65994	FALSE	85122793	0.00402584	0.0119769	9.22764e-06	0.0887412	TRUE
Asv013[S. Epidermidis]	DISORDSKINAPPENDIX	Moist	rs1370396	A	C	-0.458127	0.0162449	0.238404	FALSE	59832064	0.00448792	0.0133712	1.20324e-06	0.0920672	TRUE
Asv031[Moraxellaceae (unc.)]	DISORDSKINAPPENDIX	Dry	rs116139915	C	T	0.740165	-0.0160915	0.130034	FALSE	4787922	0.00681846	0.0168967	9.5705e-06	0.16373	TRUE
Asv031[Moraxellaceae (unc.)]	DISORDSKINAPPENDIX	Dry	rs11195220	A	T	0.699239	-0.0149478	0.117996	FALSE	110608863	0.00798366	0.01773	6.97381e-06	0.152301	TRUE
Asv031[Moraxellaceae (unc.)]	DISORDSKINAPPENDIX	Dry	rs78273222	T	C	0.614181	-0.0133518	0.127412	FALSE	3757622	0.0086693	0.017046	7.33246e-06	0.133987	TRUE
Asv031[Moraxellaceae (unc.)]	DISORDSKINAPPENDIX	Dry	rs10004131	T	C	0.450069	0.0108373	0.198853	FALSE	46955159	0.00892134	0.0142224	7.32041e-06	0.098239	TRUE
Asv031[Moraxellaceae (unc.)]	DISORDSKINAPPENDIX	Dry	rs71641023	C	A	0.927851	0.0124475	0.085681	FALSE	94689342	0.0108174	0.0203557	6.76552e-08	0.166669	TRUE
Asv031[Moraxellaceae (unc.)]	DISORDSKINAPPENDIX	Dry	rs2904413	A	G	0.399973	0.00460067	0.515942	FALSE	79244098	0.0137232	0.0113858	1.77981e-06	0.0817576	TRUE
Asv031[Moraxellaceae (unc.)]	DISORDSKINAPPENDIX	Dry	rs11119610	G	C	0.39017	0.00182522	0.366623	FALSE	210824026	0.0175399	0.0117924	8.73703e-06	0.0859413	TRUE
Asv031[Moraxellaceae (unc.)]	DISORDSKINAPPENDIX	Dry	rs11119610	G	C	0.39017	0.0528028	0.366543	FALSE	210824026	0.00131084	0.0272242	8.73703e-06	0.0859413	TRUE
Asv031[Moraxellaceae (unc.)]	DISORDSKINAPPENDIX	Dry	rs1952634	T	C	0.769555	0.0877139	0.938516	FALSE	24534501	0.0026337	0.0541623	6.7805e-06	0.167399	TRUE
Asv031[Moraxellaceae (unc.)]	DISORDSKINAPPENDIX	Dry	rs72700065	A	G	-0.8072	-0.0506142	0.12605	FALSE	24123727	0.0050595	0.0397036	4.26664e-06	0.171434	TRUE
Asv031[Moraxellaceae (unc.)]	DISORDSKINAPPENDIX	Dry	rs116139915	C	T	0.740165	0.0410743	0.130237	FALSE	4787922	0.00726185	0.0388564	9.5705e-06	0.16373	TRUE
Asv031[Moraxellaceae (unc.)]	DISORDSKINAPPENDIX	Dry	rs614689	C	G	-0.40174	0.0263093	0.660215	FALSE	85122793	0.00853555	0.0276545	9.22764e-06	0.0887412	TRUE
Asv031[Moraxellaceae (unc.)]	DISORDSKINAPPENDIX	Dry	rs1370396	A	C	-0.458127	0.0220655	0.238296	FALSE	59832064	0.0119019	0.0309637	1.20324e-06	0.0920672	TRUE
Asv031[Moraxellaceae (unc.)]	DISORDSKINAPPENDIX	Dry	rs10004131	T	C	0.450069	-0.0195144	0.198587	FALSE	46955159	0.0137749	0.0327275	7.32041e-06	0.098239	TRUE
Asv031[Moraxellaceae (unc.)]	DISORDSKINAPPENDIX	Dry	rs71641023	C	A	0.927851	-0.0184881	0.0856259	FALSE	94689342	0.0174021	0.0473314	6.76552e-08	0.166669	TRUE
Asv031[Moraxellaceae (unc.)]	DISORDSKINAPPENDIX	Dry	rs11195220	A	T	0.699239	-0.0155011	0.118237	FALSE	110608863	0.0176212	0.0409232	6.97381e-06	0.152301	TRUE
Asv031[Moraxellaceae (unc.)]	DISORDSKINAPPENDIX	Dry	rs78273222	T	C	0.614181	0.0141379	0.127518	FALSE	3757622	0.018008	0.039488	7.33246e-06	0.133987	TRUE
Asv031[Moraxellaceae (unc.)]	DISORDSKINAPPENDIX	Dry	rs165614	C	A	0.501556	-0.00537216	0.197373	FALSE	20581386	0.021772	0.033051	4.23611e-06	0.106569	TRUE
Asv031[Moraxellaceae (unc.)]	DISORDSKINAPPENDIX	Dry	rs2904413	A	G	0.399973	-0.00185598	0.515875	FALSE	79244098	0.0235932	0.0262945	1.77981e-06	0.0817576	TRUE
Asv031[Moraxellaceae (unc.)]	DISORDSKINAPPENDIX	Dry	rs11195220	A	T	0.699239	0.0471843	0.118291	FALSE	110608863	0.008031	0.0402368	6.97381e-06	0.152301	TRUE
Asv031[Moraxellaceae (unc.)]	DISORDSKINAPPENDIX	Dry	rs1370396	A	C	-0.458127	-0.0327466	0.238177	FALSE	59832064	0.00944043	0.030515	1.20324e-06	0.0920672	TRUE
Asv031[Moraxellaceae (unc.)]	DISORDSKINAPPENDIX	Dry	rs11119610	G	C	0.39017	0.0284956	0.3665	FALSE	210824026	0.00958473	0.0267934	8.73703e-06	0.0859413	TRUE
Asv031[Moraxellaceae (unc.)]	DISORDSKINAPPENDIX	Dry	rs1952634	T	C	0.769555	0.0471802	0.938481	FALSE	24534501	0.0123787	0.0527785	6.7805e-06	0.167399	TRUE
Asv031[Moraxellaceae (unc.)]	DISORDSKINAPPENDIX	Dry	rs72700065	A	G	-0.8072	-0.0349313	0.126051	FALSE	24123727	0.0123986	0.0391249	4.26664e-06	0.171434	TRUE
Asv031[Moraxellaceae (unc.)]	DISORDSKINAPPENDIX	Dry	rs2904413	A	G	0.399973	0.0219803	0.515932	FALSE	79244098	0.0132431	0.0259671	1.77981e-06	0.0817576	TRUE
Asv031[Moraxellaceae (unc.)]	DISORDSKINAPPENDIX	Dry	rs614689	C	G	-0.40174	-0.0134099	0.660127	FALSE	85122793	0.0207118	0.0271494	9.22764e-06	0.0887412	TRUE
Asv031[Moraxellaceae (unc.)]	DISORDSKINAPPENDIX	Dry	rs71641023	C	A	0.927851	-0.0173516	0.0856354	FALSE	94689342	0.0235759	0.0462073	6.76552e-08	0.166669	TRUE
Asv031[Moraxellaceae (unc.)]	DISORDSKINAPPENDIX	Dry	rs10004131	T	C	0.450069	-0.0119735	0.198595	FALSE	46955159	0.023656	0.0321623	7.32041e-06	0.098239	TRUE
Asv031[Moraxellaceae (unc.)]	DISORDSKINAPPENDIX	Dry	rs165614	C	A	0.501556	0.00714375	0.197392	FALSE	20581386	0.0275211	0.0324267	4.23611e-06	0.106569	TRUE
Asv031[Moraxellaceae (unc.)]	DISORDSKINAPPENDIX	Dry	rs78273222	T	C	0.614181	0.0081929	0.127513	FALSE	3757622	0.0277501	0.0387386	7.33246e-06	0.133987	TRUE
Asv031[Moraxellaceae (unc.)]	DISORDSKINAPPENDIX	Dry	rs116139915	C	T	0.740165	-0.00249705	0.130175	FALSE	4787922	0.0316081	0.0384677	9.5705e-06	0.16373	TRUE
Asv031[Moraxellaceae (unc.)]	DISORDSKINAPPENDIX	Dry	rs10139630	T	C	0.625653	0.0542147	0.142535	FALSE	54674016	0.0055179	0.0390966	5.44e-06	0.133824	TRUE
Asv031[Moraxellaceae (unc.)]	DISORDSKINAPPENDIX	Dry	rs4233760	T	C	-0.456036	0.0306055	0.641616	FALSE	19102061	0.00949693	0.0286204	4.84e-06	0.0969888	TRUE
Asv031[Moraxellaceae (unc.)]	DISORDSKINAPPENDIX	Dry	rs17683483	A	C	0.637435	0.0324172	0.135689	FALSE	62725122	0.0138283	0.0397565	7.29e-06	0.138329	TRUE
Asv031[Moraxellaceae (unc.)]	DISORDSKINAPPENDIX	Dry	rs113280186	C	A	0.70496	-0.0300763	0.112203	FALSE	18218509	0.0161739	0.0430934	6.04e-07	0.136656	TRUE
Asv031[Moraxellaceae (unc.)]	DISORDSKINAPPENDIX	Dry	rs7914010	C	G	-0.465775	-0.0177499	0.381993	FALSE	88100671	0.0175031	0.02793	4.74e-06	0.0989662	TRUE
Asv031[Moraxellaceae (unc.)]	DISORDSKINAPPENDIX	Dry	rs7692662	C	T	-0.471549	0.0160386	0.49521	FALSE	6491784	0.0184622	0.0270933	6.05e-06	0.101391	TRUE
Asv031[Moraxellaceae (unc.)]	DISORDSKINAPPENDIX	Dry	rs11096572	A	C	-0.446763	0.0138541	0.66157	FALSE	18995158	0.0210178	0.0288044	5.16e-06	0.0953101	TRUE
Asv031[Moraxellaceae (unc.)]	DISORDSKINAPPENDIX	Dry	rs9672325	A	G	-0.486615	0.00930641	0.593871	FALSE	35945979	0.0245327	0.0276007	3.75e-06	0.102238	TRUE
Asv031[Moraxellaceae (unc.)]	DISORDSKINAPPENDIX	Dry	rs7636212	G	A	0.516462	-0.00473847	0.739374	FALSE	32984379	0.0292945	0.0310828	7.58e-06	0.112297	TRUE
Asv031[Moraxellaceae (unc.)]	DISORDSKINAPPENDIX	Dry	rs4146665	A	G	-0.56025	0.00171196	0.7846	FALSE	95217382	0.0319614	0.033173	1.71e-06	0.113559	TRUE
Asv031[Moraxellaceae (unc.)]	DISORDSKINAPPENDIX	Dry	rs7692662	C	T	-0.471549	0.185873	0.4956	FALSE	6491784	0.00264332	0.101136	6.05316e-06	0.101391	TRUE
Asv031[Moraxellaceae (unc.)]	DISORDSKINAPPENDIX	Dry	rs10139630	T	C	0.625653	-0.252025	0.142131	FALSE	54674016	0.00341193	0.146463	5.44008e-06	0.133824	TRUE
Asv031[Moraxellaceae (unc.)]	DISORDSKINAPPENDIX	Dry	rs4233760	T	C	-0.456036	0.164293	0.64099	FALSE	19102061	0.00496768	0.106863	4.83705e-06	0.0969888	TRUE
Asv031[Moraxellaceae (unc.)]	DISORDSKINAPPENDIX	Dry	rs113280186	C	A	0.70496	0.202684	0.112499	FALSE	18218509	0.0082794	0.160618	6.04197e-07	0.136656	TRUE
Asv031[Moraxellaceae (unc.)]	DISORDSKINAPPENDIX	Dry	rs9672325	A	G	-0.486615	0.0953719	0.593155	FALSE	35945979	0.014337	0.103849	3.74766e-06	0.102238	TRUE
Asv031[Moraxellaceae (unc.)]	DISORDSKINAPPENDIX	Dry	rs7914010	C	G	-0.465775	-0.0741587	0.3828	FALSE	88100671	0.0191197	0.104517	4.74293e-06	0.0989662	TRUE
Asv031[Moraxellaceae (unc.)]	DISORDSKINAPPENDIX	Dry	rs4146665	A	G	-0.56025	0.0701493	0.785069	FALSE	95217382	0.0229812	0.124956	1.71335e-06	0.113559	TRUE
Asv031[Moraxellaceae (unc.)]	DISORDSKINAPPENDIX	Dry	rs17683483	A	C	0.637435	-0.0823249	0.135208	FALSE	62725122	0.0232048	0.148813	7.28975e-06	0.138329	TRUE
Asv035[Staphylococcus (unc.)]	DISORDSKINAPPENDIX	Dry	rs11096572	A	C	-0.446763	-0.00937053	0.662761	FALSE	18995158	0.0372279	0.107747	5.15504e-06	0.0953101	TRUE
Asv035[Staphylococcus (unc.)]	DISORDSKINAPPENDIX	Dry	rs7636212	G	A	0.516462	-0.00183441	0.73947	FALSE	32984379	0.0394953	0.11599	7.58123e-06	0.112297	TRUE
Asv035[Staphylococcus (unc.)]	DISORDSKINAPPENDIX	Dry	rs1540533	A	G	0.486743	-0.045393	0.31296	FALSE	62768265	0.00411557	0.0294687	7.67e-06	0.105695	TRUE
Asv035[Staphylococcus (unc.)]	DISORDSKINAPPENDIX	Dry	rs17634797	A	G	0.641841	-0.0331972	0.128833	FALSE	61028389	0.01373	0.0404571	4.56e-06	0.135849	TRUE
Asv035[Staphylococcus (unc.)]	DISORDSKINAPPENDIX	Dry	rs1895677	T	C	-0.868201	0.0313195	0.869378	FALSE	71684626	0.0145065	0.040136	1.36e-06	0.173792	TRUE
Asv035[Staphylococcus (unc.)]	DISORDSKINAPPENDIX	Dry	rs6034145	T	G	0.69606	0.0279615	0.13911	FALSE	15286896	0.0157656	0.038962	5.96e-06	0.149253	TRUE
Asv035[Staphylococcus (unc.)]	DISORDSKINAPPENDIX	Dry	rs1624289	G	A	0.574788	0.0194304	0.334019	FALSE	114729822	0.0166727	0.0288196	2.23e-06	0.117633	TRUE
Asv035[Staphylococcus (unc.)]	DISORDSKINAPPENDIX	Dry	rs78265246	C	A	0.705906	-0.0226095	0.125576	FALSE	72314493	0.0194041	0.0410866	2.37e-06	0.144873	TRUE
Asv035[Staphylococcus (unc.)]	DISORDSKINAPPENDIX	Dry	rs116279574	T	C	0.754499	0.0254963	0.074287	FALSE	169874495	0.0208628	0.0522968	5.65e-06	0.161364	TRUE
Asv035[Staphylococcus (unc.)]	DISORDSKINAPPENDIX	Dry	rs4315864	T	C	0.811588	0.0138571	0.0708613	FALSE	117864420	0.0265625	0.0538365	3.93e-06	0.170546	TRUE
Asv035[Staphylococcus (unc.)]	DISORDSKINAPPENDIX	Dry	rs6430529	T	G	-0.50547	0.00679224	0.65989	FALSE	134675453	0.027088	0.0286568	4.84e-07	0.0968677	TRUE
Asv035[Staphylococcus (unc.)]	DISORDSKINAPPENDIX	Dry	rs6430529	T	G	-0.50547	0.17935	0.65995	FALSE	134675453	0.00372203	0.106786	4.84319e-07	0.0968677	TRUE
Asv035[Staphylococcus (unc.)]	DISORDSKINAPPENDIX	Dry	rs116279574	T	C	0.754499	-0.296401	0.074277	FALSE	169874495	0.00528088	0.19679	5.6511e-06	0.161364	TRUE
Asv035[Staphylococcus (unc.)]	DISORDSKINAPPENDIX	Dry	rs6034145	T	G	0.69606	-0.14371	0.139921	FALSE	15286896	0.0129121	0.14535	5.95762e-06	0.149253	TRUE
Asv035[Staphylococcus (unc.)]	DISORDSKINAPPENDIX	Dry	rs78265246	C	A	0.705906	-0.114023	0.12521	FALSE	72314493	0.0182896	0.15338	2.36807e-06	0.144873	TRUE
Asv035[Staphylococcus (unc.)]	DISORDSKINAPPENDIX	Dry	rs1895677	T	C	-0.868201	-0.0671801	0.869025	FALSE	71684626	0.0263375	0.151966	1.35748e-06	0.173792	TRUE
Asv035[Staphylococcus (unc.)]	DISORDSKINAPPENDIX	Dry	rs4315864	T	C	0.811588	0.0664487	0.0704118	FALSE	117864420	0.029724	0.202743	3.92828e-06	0.170546	TRUE
Asv035[Staphylococcus (unc.)]	DISORDSKINAPPENDIX	Dry	rs17634797	A	G	0.641841	0.0342797	0.128889	FALSE	61028389	0.0328312	0.151318	4.56384e-06	0.135849	TRUE
Asv035[Staphylococcus (unc.)]	DISORDSKINAPPENDIX	Dry	rs1540533	A	G	0.486743	0.0100954	0.313818	FALSE	62768265	0.0370707	0.109836	7.67276e-06	0.105695	TRUE
Asv035[Staphylococcus (unc.)]	DISORDSKINAPPENDIX	Dry	rs1624289	G	A	0.574788	0.000662527	0.334797	FALSE	114729822	0.0398039	0.107833	2.22699e-06	0.117633	TRUE
Asv035[Staphylococcus (unc.)]	DISORDSKINAPPENDIX	Dry	rs8016356	G	A	0.664073	-0.216442	0.151134	FALSE	70620829	0.00576023	0.0783891	8.28012e-06	0.143153	TRUE
Asv035[Staphylococcus (unc.)]	DISORDSKINAPPENDIX	Dry	rs9953153	T	G	-0.57162	0.0342942	0.337999	FALSE	70305200	0.00433701	0.0120223	6.3455e-06	0.121556	TRUE
Asv035[Staphylococcus (unc.)]	DISORDSKINAPPENDIX	Dry	rs8044081	T	C	0.718927	-0.0266379	0.286429	FALSE	83510153	0.0351455	0.0126445	2.63988e-06	0.146464	TRUE
Asv035[Staphylococcus (unc.)]	DISORDSKINAPPENDIX	Dry	rs7725964	G	A	0.735858	-0.0908944	0.2211	FALSE	32070773	0.0236587	0.0401721	5.35866e-06	0.155156	TRUE
Asv035[Staphylococcus (unc.)]	DISORDSKINAPPENDIX	Dry	rs8016356	G	A	0.664073	0.0805919	0.151292	FALSE	70620829	0.0345979	0.0381403	8.28012e-06	0.143153	TRUE
Asv035[Staphylococcus (unc.)]	DISORDSKINAPPENDIX	Dry	rs11826993	A	C	1.119	-0.155296	0.0538872	FALSE	129996425	0.0225025	0.0680595	3.26538e-07	0.208017	TRUE
Asv035[Staphylococcus (unc.)]	DISORDSKINAPPENDIX	Dry	rs11826993	A	C	1.119	-0.144254	0.0539296	FALSE	129996425	0.0288616	0.066009	3.26538e-07	0.208017	TRUE
Asv035[Staphylococcus (unc.)]	DISORDSKINAPPENDIX	Dry	rs8005122	A	G	1.32813	-0.0774474	0.0738873	FALSE	85837051	0.0366362	0.0370599	4.83147e-06	0.278598	TRUE
Asv035[Staphylococcus (unc.)]	DISORDSKINAPPENDIX	Dry	rs8044081	T	C	0.718927	-0.04257	0.286508	FALSE	83510153	0.0469137	0.0214234	2.63988e-06	0.146464	TRUE
Asv035[Staphylococcus (unc.)]	DISORDSKINAPPENDIX	Dry	rs9953153	T	G	-0.57162	0.0320183	0.337752	FALSE	70305200	0.0163799	0.0133391	6.3455e-06	0.121556	TRUE
Asv035[Staphylococcus (unc.)]	DISORDSKINAPPENDIX	Dry	rs72695088	G	A	0.67836	-0.0344517	0.169096	FALSE	163106667	0.0409072	0.0168511	3.2502e-07	0.12608	TRUE
Asv035[Staphylococcus (unc.)]	DISORDSKINAPPENDIX	Dry	rs8005122	A	G	1.32813	0.141509	0.0739052	FALSE	85837051	0.0155589	0.0584966	4.83147e-06	0.278598	TRUE
Asv035[Staphylococcus (unc.)]	DISORDSKINAPPENDIX	Dry	rs9953153	T	G	-0.57162	0.0233866	0.337999	FALSE	70305200	0.00300165	0.00788074	6.3455e-06	0.121556	TRUE
Asv035[Staphylococcus (unc.)]	DISORDSKINAPPENDIX	Dry	rs9953153	T	G	-0.57162	0.185799	0.33755	FALSE	70305200	0.0122383	0.0741651	6.3455e-06	0.121556	TRUE
Asv035[Staphylococcus (unc.)]	DISORDSKINAPPENDIX	Dry	rs8005122	A	G	1.32813	0.261033	0.0739871	FALSE	85837051	0.0385816	0.126187	4.83147e-06	0.278598	TRUE
Asv035[Staphylococcus (unc.)]	DISORDSKINAPPENDIX	Dry	rs9953153	T	G	-0.57162	-0.0602966	0.338003	FALSE	70305200	0.0484619	0.0305562	6.3455e-06	0.121556	TRUE
Asv035[Staphylococcus (unc.)]	DISORDSKINAPPENDIX	Dry	rs11826993	A	C	1.119	0.0565807	0.0539296	FALSE	129996425	0.0428785	0.0279426	3.26538e-07	0.208017	TRUE
Asv035[Staphylococcus (unc.)]	DISORDSKINAPPENDIX	Dry	rs9836671	T	C	1.05763	0.0440955	0.0885231	FALSE	5339274	0.000953279	0.0264371	3.33541e-07	0.196778	TRUE
Asv035[Staphylococcus (unc.)]	DISORDSKINAPPENDIX	Dry	rs11826993	A	C	1.119	0.0512475	0.0539069	FALSE	129996425	0.00121055	0.0330553	3.26538e-07	0.208017	TRUE
Asv035[Staphylococcus (unc.)]	DISORDSKINAPPENDIX	Dry	rs72695088	G	A	0.67836	-0.0284325	0.169131	FALSE	163106667	0.00154288	0.019959	3.2502e-07	0.12608	TRUE
Asv035[Staphylococcus (unc.)]	DISORDSKINAPPENDIX	Dry	rs9953153	T	G	-0.57162	0.0147745	0.338008	FALSE	70305200	0.00349718	0.0157993	6.3455e-06	0.121556	TRUE
Asv035[Staphylococcus (unc.)]	DISORDSKINAPPENDIX	Dry	rs12487305	C	T	0.945656	-0.01864	0.148543	FALSE	36445534	0.00377938	0.0211409	6.29808e-06	0.201018	TRUE
Asv035[Staphylococcus (unc.)]	DISORDSKINAPPENDIX	Dry	rs7725964	G	A	0.735858	-0.013272	0.221093	FALSE	32070773	0.00459923	0.01796	5.35866e-06	0.155156	TRUE
Asv035[Staphylococcus (unc.)]	DISORDSKINAPPENDIX	Dry	rs8005122	A	G	1.32813	0.0180527	0.0738991	FALSE	85837051	0.00529276	0.0286956	4.83147e-06	0.278598	TRUE
Asv035[Staphylococcus (unc.)]	DISORDSKINAPPENDIX	Dry	rs8044081	T	C	0.718927	-0.00867438	0.286471	FALSE	83510153	0.0060072	0.0165742	2.63988e-06	0.146464	TRUE
Asv035[Staphylococcus (unc.)]	DISORDSKINAPPENDIX	Dry	rs8016356	G	A	0.664073	0.0107163	0.151275	FALSE	70620829	0.00608131	0.0208999	8.28012e-06	0.143153	TRUE
Asv035[Staphylococcus (unc.)]	DISORDSKINAPPENDIX	Dry	rs8044081	T	C	0.718927	0.0251536	0.286992	FALSE	83510153	0.000908552	0.0125726	2.63988e-06	0.146464	TRUE
Asv035[Staphylococcus (unc.)]	DISORDSKINAPPENDIX	Dry	rs9953153	T	G	-0.57162	-0.0114771	0.337507	FALSE	70305200	0.00676736	0.0119878	6.3455e-06	0.121556	TRUE
Asv035[Staphylococcus (unc.)]	DISORDSKINAPPENDIX	Dry	rs7725964	G	A	0.735858	0.0117904	0.221089	FALSE	32070773	0.00771556	0.0135943	5.35866e-06	0.155156	TRUE
Asv086[A. Johnsonii]	DISORDSKINAPPENDIX	Dry	rs11826993	A	C	1.119	0.0184462	0.0539764	FALSE	129996425	0.00919642	0.0249562	3.26538e-07	0.208017	TRUE
Asv086[A. Johnsonii]	DISORDSKINAPPENDIX	Dry	rs9836671	T	C	1.05763	0.00925139	0.0884983	FALSE	5339274	0.0128778	0.0200131	3.33541e-07	0.196778	TRUE
Asv086[A. Johnsonii]	DISORDSKINAPPENDIX	Dry	rs12487305	C	T	0.945656	-0.00492825	0.148741	FALSE	36445534	0.0151769	0.0160531	6.29808e-06	0.201018	TRUE
Asv086[A. Johnsonii]	DISORDSKINAPPENDIX	Dry	rs72695088	G	A	0.67836	-0.0037638	0.168635	FALSE	163106667	0.0160581	0.0150799	3.2502e-07	0.12608	TRUE
Asv086[A. Johnsonii]	DISORDSKINAPPENDIX	Dry	rs8005122	A	G	1.32813	0.00420312	0.074036	FALSE	85837051	0.0169352	0.0217493	4.83147e-06	0.278598	TRUE
Asv086[A. Johnsonii]	DISORDSKINAPPENDIX	Dry	rs8016356	G	A	0.664073	0.00280705	0.151207	FALSE	70620829	0.0171854	0.0158321	8.28012e-06	0.143153	TRUE
Asv086[A. Johnsonii]	DISORDSKINAPPENDIX	Dry	rs8044081	T	C	0.718927	-0.0497	0.286807	FALSE	83510153	0.00222397	0.0292195	2.63988e-06	0.146464	TRUE
Asv086[A. Johnsonii]	DISORDSKINAPPENDIX	Dry	rs7725964	G	A	0.735858	-0.0195751	0.220875	FALSE	32070773	0.0133346	0.0314283	5.35866e-06	0.155156	TRUE
Asv086[A. Johnsonii]	DISORDSKINAPPENDIX	Dry	rs8016356	G	A	0.664073	0.0202901	0.15122	FALSE	70620829	0.0144574	0.0365012	8.28012e-06	0.143153	TRUE
Asv086[A. Johnsonii]	DISORDSKINAPPENDIX	Dry	rs72695088	G	A	0.67836	0.0150006	0.168554	FALSE	163106667	0.0166542	0.0347709	3.2502e-07	0.12608	TRUE
Asv086[A. Johnsonii]	DISORDSKINAPPENDIX	Dry	rs11826993	A	C	1.119	-0.0242135	0.0538841	FALSE	129996425	0.0168676	0.0576918	3.26538e-07	0.208017	TRUE
Asv086[A. Johnsonii]	DISORDSKINAPPENDIX	Dry	rs12487305	C	T	0.945656	-0.0145917	0.148831	FALSE	36445534	0.0173804	0.0372439	6.29808e-06	0.201018	TRUE
Asv086[A. Johnsonii]	DISORDSKINAPPENDIX	Dry	rs9836671	T	C	1.05763	0.00938241	0.0884354	FALSE	5339274	0.0209911	0.0463669	3.33541e-07	0.196778	TRUE
Asv086[A. Johnsonii]	DISORDSKINAPPENDIX	Dry	rs8005122	A	G	1.32813	0.00995695	0.0740732	FALSE	85837051	0.0210788	0.050323	4.83147e-06	0.278598	TRUE
Asv086[A. Johnsonii]	DISORDSKINAPPENDIX	Dry	rs9953153	T	G	-0.57162	0.00207725	0.337677	FALSE	70305200	0.0235019	0.0276326	6.3455e-06	0.121556	TRUE
Asv086[A. Johnsonii]	DISORDSKINAPPENDIX	Dry	rs12487305	C	T	0.945656	0.0764919	0.14895	FALSE	36445534	0.0012003	0.0364798	6.29808e-06	0.201018	TRUE
Asv086[A. Johnsonii]	DISORDSKINAPPENDIX	Dry	rs8044081	T	C	0.718927	-0.0331312	0.286833	FALSE	83510153	0.00825137	0.0286518	2.63988e-06	0.146464	TRUE
Asv086[A. Johnsonii]	DISORDSKINAPPENDIX	Dry	rs72695088	G	A	0.67836	-0.0317691	0.168485	FALSE	163106667	0.011767	0.0342058	3.2502e-07	0.12608	TRUE
Asv086[A. Johnsonii]	DISORDSKINAPPENDIX	Dry	rs8005122	A	G	1.32813	-0.0329759	0.0740305	FALSE	85837051	0.0169381	0.0498327	4.83147e-06	0.278598	TRUE
Asv086[A. Johnsonii]	DISORDSKINAPPENDIX	Dry	rs7725964	G	A	0.735858	0.0188378	0.220945	FALSE	32070773	0.0180634	0.0308848	5.35866e-06	0.155156	TRUE
Asv086[A. Johnsonii]	DISORDSKINAPPENDIX	Dry	rs9953153	T	G	-0.57162	-0.00981293	0.337628	FALSE	70305200	0.023947	0.0272141	6.3455e-06	0.121556	TRUE
Asv086[A. Johnsonii]	DISORDSKINAPPENDIX	Dry	rs11826993	A	C	1.119	0.017583	0.0539054	FALSE	129996425	0.0252023	0.0566014	3.26538e-07	0.208017	TRUE
Asv086[A. Johnsonii]	DISORDSKINAPPENDIX	Dry	rs8016356	G	A	0.664073	-0.00518441	0.151205	FALSE	70620829	0.0294895	0.0357466	8.28012e-06	0.143153	TRUE
Asv086[A. Johnsonii]	DISORDSKINAPPENDIX	Dry	rs9836671	T	C	1.05763	0.00238524	0.0884375	FALSE	5339274	0.0319372	0.0454173	3.33541e-07	0.196778	TRUE
Asv086[A. Johnsonii]	DISORDSKINAPPENDIX	Dry	rs10985266	C	T	-0.65887	0.102788	0.0960893	FALSE	98165961	0.026507	0.0463281	4.50823e-06	0.140499	TRUE
Asv086[A. Johnsonii]	DISORDSKINAPPENDIX	Dry	rs11860576	G	A	-0.490329	-0.0826199	0.222297	FALSE	17041592	0.0122566	0.0329864	5.17039e-06	0.105246	TRUE
Asv086[A. Johnsonii]	DISORDSKINAPPENDIX	Dry	rs10508687	C	T	-0.966309	0.167064	0.0537372	FALSE	25037008	0.0111455	0.0658223	1.19259e-06	0.194081	TRUE
Asv086[A. Johnsonii]	DISORDSKINAPPENDIX	Dry	rs10508687	C	T	-0.966309	-0.0913871	0.0537608	FALSE	25037008	0.0329102	0.0428408	1.19259e-06	0.194081	TRUE
Asv086[A. Johnsonii]	DISORDSKINAPPENDIX	Dry	rs2178724	A	C	-0.449572	0.0397543	0.343053	FALSE	54495993	0.0455932	0.0198858	3.41634e-06	0.0946277	TRUE
Asv086[A. Johnsonii]	DISORDSKINAPPENDIX	Dry	rs1549112	C	T	-0.420309	0.0299356	0.676768	FALSE	175369175	0.0268355	0.0135217	1.21524e-06	0.0844861	TRUE
Asv086[A. Johnsonii]	DISORDSKINAPPENDIX	Dry	rs10508687	C	T	-0.966309	-0.309234	0.05373	FALSE	25037008	0.0461466	0.155078	1.19259e-06	0.194081	TRUE
Asv086[A. Johnsonii]	DISORDSKINAPPENDIX	Dry	rs10847912	T	G	0.425175	-0.161423	0.378534	FALSE	129619009	0.0172783	0.0678038	2.56918e-06	0.0883299	TRUE
Asv086[A. Johnsonii]	DISORDSKINAPPENDIX	Dry	rs10508687	C	T	-0.966309	-0.540854	0.053727	FALSE	25037008	0.00824784	0.204733	1.19259e-06	0.194081	TRUE
Asv086[A. Johnsonii]	DISORDSKINAPPENDIX	Dry	rs6458323	C	T	0.400539	-0.0578985	0.342444	FALSE	43097591	0.0209865	0.0250836	6.15469e-06	0.0867008	TRUE
Asv086[A. Johnsonii]	DISORDSKINAPPENDIX	Dry	rs723546	C	T	0.470817	-0.0799344	0.189032	FALSE	137546317	0.029636	0.0367528	9.08526e-06	0.103901	TRUE
Asv086[A. Johnsonii]	DISORDSKINAPPENDIX	Dry	rs9849313	C	T	-0.460153	0.0278631	0.227718	FALSE	29788384	0.0011819	0.0178334	1.7428e-06	0.0939537	TRUE
Asv086[A. Johnsonii]	DISORDSKINAPPENDIX	Dry	rs1549112	C	T	-0.420309	0.0164802	0.676844	FALSE	175369175	0.00303476	0.0160157	1.21524e-06	0.0844861	TRUE
Asv086[A. Johnsonii]	DISORDSKINAPPENDIX	Dry	rs10508687	C	T	-0.966309	0.0297184	0.0537331	FALSE	25037008	0.0036954	0.0331184	1.19259e-06	0.194081	TRUE
Asv086[A. Johnsonii]	DISORDSKINAPPENDIX	Dry	rs11860576	G	A	-0.490329	-0.00962979	0.222382	FALSE	17041592	0.00592386	0.0179868	5.17039e-06	0.105246	TRUE
Asv086[A. Johnsonii]	DISORDSKINAPPENDIX	Dry	rs10847912	T	G	0.425175	-0.00705603	0.378504	FALSE	129619009	0.00646936	0.0154054	2.56918e-06	0.0883299	TRUE
Asv086[A. Johnsonii]	DISORDSKINAPPENDIX	Dry	rs2178724	A	C	-0.449572	0.0058122	0.343185	FALSE	54495993	0.00712814	0.0157906	3.41634e-06	0.0946277	TRUE
Asv086[A. Johnsonii]	DISORDSKINAPPENDIX	Dry	rs723546	C	T	0.470817	0.00352655	0.188911	FALSE	137546317	0.00853386	0.0190831	9.08526e-06	0.103901	TRUE
Asv086[A. Johnsonii]	DISORDSKINAPPENDIX	Dry	rs10985266	C	T	-0.65887	0.0034957	0.096127	FALSE	98165961	0.00890288	0.0253423	4.50823e-06	0.140499	TRUE
Asv086[A. Johnsonii]	DISORDSKINAPPENDIX	Dry	rs6458323	C	T	0.400539	0.00134778	0.342547	FALSE	43097591	0.00931876	0.0157662	6.15469e-06	0.0867008	TRUE
Asv086[A. Johnsonii]	DISORDSKINAPPENDIX	Dry	rs1549112	C	T	-0.420309	-0.0205869	0.677608	FALSE	175369175	0.00179184	0.0121274	1.21524e-06	0.0844861	TRUE
Asv086[A. Johnsonii]	DISORDSKINAPPENDIX	Dry	rs11860576	G	A	-0.490329	0.0203893	0.222422	FALSE	17041592	0.0026804	0.013607	5.17039e-06	0.105246	TRUE
Asv086[A. Johnsonii]	DISORDSKINAPPENDIX	Dry	rs10985266	C	T	-0.65887	0.0267977	0.0961775	FALSE	98165961	0.0033447	0.0194025	4.50823e-06	0.140499	TRUE
Asv086[A. Johnsonii]	DISORDSKINAPPENDIX	Dry	rs10847912	T	G	0.425175	0.015564	0.377995	FALSE	129619009	0.0036453	0.0116688	2.56918e-06	0.0883299	TRUE
Asv086[A. Johnsonii]	DISORDSKINAPPENDIX	Dry	rs2178724	A	C	-0.449572	-0.0133909	0.343784	FALSE	54495993	0.0052529	0.0119544	3.41634e-06	0.0946277	TRUE
Class Alphaproteobacteria	DISORDSKINAPPENDIX	Moist	rs723546	C	T	0.470817	-0.00835362	0.189296	FALSE	137546317	0.0112782	0.0144766	9.08526e-06	0.103901	TRUE
Class Alphaproteobacteria	DISORDSKINAPPENDIX	Moist	rs10508687	C	T	-0.966309	-0.00984185	0.0537179	FALSE	25037008	0.0138606	0.0249323	1.19259e-06	0.194081	TRUE
Class Alphaproteobacteria	DISORDSKINAPPENDIX	Moist	rs6458323	C	T	0.400539	-0.00396142	0.342695	FALSE	43097591	0.0147991	0.011935	6.15469e-06	0.0867008	TRUE
Class Alphaproteobacteria	DISORDSKINAPPENDIX	Moist	rs9849313	C	T	-0.460153	0.00083541	0.227367	FALSE	29788384	0.0190176	0.0135613	1.7428e-06	0.0939537	TRUE
Class Alphaproteobacteria	DISORDSKINAPPENDIX	Moist	rs9849313	C	T	-0.460153	0.0241224	0.227427	FALSE	29788384	0.0110117	0.0312708	1.7428e-06	0.0939537	TRUE
Class Alphaproteobacteria	DISORDSKINAPPENDIX	Moist	rs6458323	C	T	0.400539	-0.0190577	0.342652	FALSE	43097591	0.012236	0.027572	6.15469e-06	0.0867008	TRUE
Class Alphaproteobacteria	DISORDSKINAPPENDIX	Moist	rs11860576	G	A	-0.490329	0.0173408	0.222317	FALSE	17041592	0.0145456	0.0314875	5.17039e-06	0.105246	TRUE
Class Alphaproteobacteria	DISORDSKINAPPENDIX	Moist	rs10985266	C	T	-0.65887	-0.019341	0.0961541	FALSE	98165961	0.0166867	0.0450184	4.50823e-06	0.140499	TRUE
Class Alphaproteobacteria	DISORDSKINAPPENDIX	Moist	rs10508687	C	T	-0.966309	0.023969	0.0536835	FALSE	25037008	0.0169348	0.0576146	1.19259e-06	0.194081	TRUE
Class Alphaproteobacteria	DISORDSKINAPPENDIX	Moist	rs1549112	C	T	-0.420309	-0.0111756	0.677903	FALSE	175369175	0.0172558	0.0280413	1.21524e-06	0.0844861	TRUE
Class Alphaproteobacteria	DISORDSKINAPPENDIX	Moist	rs2178724	A	C	-0.449572	-0.0079892	0.343939	FALSE	54495993	0.0193291	0.0277172	3.41634e-06	0.0946277	TRUE
Class Alphaproteobacteria	DISORDSKINAPPENDIX	Moist	rs723546	C	T	0.470817	0.00937481	0.189424	FALSE	137546317	0.019502	0.0335757	9.08526e-06	0.103901	TRUE
Class Alphaproteobacteria	DISORDSKINAPPENDIX	Moist	rs10847912	T	G	0.425175	0.00551152	0.377692	FALSE	129619009	0.0209509	0.0269639	2.56918e-06	0.0883299	TRUE
Class Alphaproteobacteria	DISORDSKINAPPENDIX	Moist	rs1549112	C	T	-0.420309	-0.0621677	0.677764	FALSE	175369175	0.000787027	0.0274665	1.21524e-06	0.0844861	TRUE
Class Alphaproteobacteria	DISORDSKINAPPENDIX	Moist	rs10508687	C	T	-0.966309	-0.0794261	0.0536369	FALSE	25037008	0.00529253	0.0563625	1.19259e-06	0.194081	TRUE
Class Alphaproteobacteria	DISORDSKINAPPENDIX	Moist	rs10847912	T	G	0.425175	0.0251748	0.37772	FALSE	129619009	0.0113875	0.026473	2.56918e-06	0.0883299	TRUE
Class Alphaproteobacteria	DISORDSKINAPPENDIX	Moist	rs11860576	G	A	-0.490329	-0.0290064	0.222219	FALSE	17041592	0.0116338	0.030973	5.17039e-06	0.105246	TRUE
Class Alphaproteobacteria	DISORDSKINAPPENDIX	Moist	rs6458323	C	T	0.400539	-0.00817472	0.342656	FALSE	43097591	0.0254395	0.0271312	6.15469e-06	0.0867008	TRUE
Class Alphaproteobacteria	DISORDSKINAPPENDIX	Moist	rs9849313	C	T	-0.460153	-0.00772539	0.227358	FALSE	29788384	0.0267357	0.0308191	1.7428e-06	0.0939537	TRUE
Class Alphaproteobacteria	DISORDSKINAPPENDIX	Moist	rs2178724	A	C	-0.449572	0.00604021	0.34398	FALSE	54495993	0.0274665	0.0271581	3.41634e-06	0.0946277	TRUE
Class Alphaproteobacteria	DISORDSKINAPPENDIX	Moist	rs10985266	C	T	-0.65887	-0.00306733	0.0961578	FALSE	98165961	0.0314995	0.0444496	4.50823e-06	0.140499	TRUE
Class Alphaproteobacteria	DISORDSKINAPPENDIX	Moist	rs723546	C	T	0.470817	0.00140514	0.189411	FALSE	137546317	0.0322005	0.032979	9.08526e-06	0.103901	TRUE
Class Alphaproteobacteria	DISORDSKINAPPENDIX	Moist	rs1461335	T	G	-0.460959	-0.0654571	0.791977	FALSE	24941454	0.00167316	0.0334254	9.22e-06	0.101334	TRUE
Class Alphaproteobacteria	DISORDSKINAPPENDIX	Moist	rs78517270	C	T	0.557283	0.05866	0.148691	FALSE	181535938	0.0042833	0.0385909	9.18e-06	0.122481	TRUE
Class Alphaproteobacteria	DISORDSKINAPPENDIX	Moist	rs71517826	G	A	0.735176	-0.0569225	0.127543	FALSE	25607874	0.005469	0.0409069	9.07e-07	0.145136	TRUE
Class Alphaproteobacteria	DISORDSKINAPPENDIX	Moist	rs56841789	C	G	0.84003	-0.0673995	0.0795847	FALSE	123434958	0.00589823	0.0499176	6.88e-06	0.181957	TRUE
Class Alphaproteobacteria	DISORDSKINAPPENDIX	Moist	rs72791013	T	C	0.730394	0.0606918	0.100367	FALSE	133738446	0.00600523	0.0452832	5.35e-06	0.156267	TRUE
Class Alphaproteobacteria	DISORDSKINAPPENDIX	Moist	rs12583353	G	A	0.727371	0.0510445	0.148473	FALSE	37493438	0.0060159	0.0381132	1.58e-06	0.1471	TRUE
Class Alphaproteobacteria	DISORDSKINAPPENDIX	Moist	rs13016626	C	G	0.675625	0.0227582	0.134907	FALSE	222307116	0.0188776	0.0396852	5.75e-06	0.145062	TRUE
Class Alphaproteobacteria	DISORDSKINAPPENDIX	Moist	rs2185282	T	C	0.607803	-0.0198205	0.188433	FALSE	240612890	0.0189914	0.0348687	1.7e-06	0.123307	TRUE
Class Alphaproteobacteria	DISORDSKINAPPENDIX	Moist	rs7545638	C	T	-0.425498	-0.0132099	0.378403	FALSE	77438131	0.0213026	0.0281668	8.4e-06	0.0930952	TRUE
Class Alphaproteobacteria	DISORDSKINAPPENDIX	Moist	rs7611260	T	C	0.427559	0.00980219	0.36629	FALSE	32983618	0.0243064	0.0283137	6.08e-06	0.0920509	TRUE
Class Alphaproteobacteria	DISORDSKINAPPENDIX	Moist	rs56769899	C	T	0.630775	0.00891099	0.127414	FALSE	55492196	0.0275632	0.0407484	9.46e-06	0.138847	TRUE
Class Alphaproteobacteria	DISORDSKINAPPENDIX	Moist	rs3857844	G	C	0.555276	0.00768729	0.179409	FALSE	75645558	0.0276432	0.0356545	7.06e-07	0.108479	TRUE
Class Alphaproteobacteria	DISORDSKINAPPENDIX	Moist	rs715888	G	A	0.428546	-0.00572378	0.39106	FALSE	82700570	0.0279125	0.0278864	6.85e-06	0.0928064	TRUE
Class Alphaproteobacteria	DISORDSKINAPPENDIX	Moist	rs12821366	G	A	0.723006	0.00119756	0.111832	FALSE	18440928	0.032604	0.0436643	8.56e-06	0.158337	TRUE
Class Alphaproteobacteria	DISORDSKINAPPENDIX	Moist	rs4717861	T	C	-0.493584	-0.00055302	0.797188	FALSE	74001853	0.0328995	0.0338991	7.6e-06	0.107452	TRUE
Class Alphaproteobacteria	DISORDSKINAPPENDIX	Moist	rs4717861	T	C	-0.493584	-0.144395	0.797677	FALSE	74001853	0.0102446	0.12715	7.60303e-06	0.107452	TRUE
Class Alphaproteobacteria	DISORDSKINAPPENDIX	Moist	rs78517270	C	T	0.557283	-0.161387	0.148408	FALSE	181535938	0.0106363	0.145063	9.18162e-06	0.122481	TRUE
Class Alphaproteobacteria	DISORDSKINAPPENDIX	Moist	rs72791013	T	C	0.730394	-0.180966	0.100715	FALSE	133738446	0.0112871	0.168272	5.34714e-06	0.156267	TRUE
Class Alphaproteobacteria	DISORDSKINAPPENDIX	Moist	rs56841789	C	G	0.84003	0.141681	0.0799564	FALSE	123434958	0.0177852	0.18535	6.87536e-06	0.181957	TRUE
Class Alphaproteobacteria	DISORDSKINAPPENDIX	Moist	rs3857844	G	C	0.555276	-0.0949416	0.179279	FALSE	75645558	0.0189336	0.132405	7.06275e-07	0.108479	TRUE
Class Alphaproteobacteria	DISORDSKINAPPENDIX	Moist	rs715888	G	A	0.428546	-0.0669298	0.390833	FALSE	82700570	0.0207975	0.104018	6.84545e-06	0.0928064	TRUE
Class Alphaproteobacteria	DISORDSKINAPPENDIX	Moist	rs71517826	G	A	0.735176	-0.0796409	0.127441	FALSE	25607874	0.0241476	0.15342	9.06591e-07	0.145136	TRUE
Class Alphaproteobacteria	DISORDSKINAPPENDIX	Moist	rs2185282	T	C	0.607803	-0.0628582	0.189358	FALSE	240612890	0.0252352	0.130821	1.70108e-06	0.123307	TRUE
Class Alphaproteobacteria	DISORDSKINAPPENDIX	Moist	rs7545638	C	T	-0.425498	0.0444256	0.377797	FALSE	77438131	0.0269177	0.105246	8.3989e-06	0.0930952	TRUE
Class Alphaproteobacteria	DISORDSKINAPPENDIX	Moist	rs12821366	G	A	0.723006	0.0496633	0.111107	FALSE	18440928	0.030469	0.163788	8.55765e-06	0.158337	TRUE
Class Alphaproteobacteria	DISORDSKINAPPENDIX	Moist	rs12583353	G	A	0.727371	0.0346158	0.149635	FALSE	37493438	0.0322776	0.141649	1.58409e-06	0.1471	TRUE
Class Alphaproteobacteria	DISORDSKINAPPENDIX	Moist	rs56769899	C	T	0.630775	0.0260133	0.127415	FALSE	55492196	0.0346144	0.153419	9.46376e-06	0.138847	TRUE
Asv004[Corynebacterium (unc.)]	ACNE	Moist	rs1461335	T	G	-0.460959	-0.0159043	0.792504	FALSE	24941454	0.0359425	0.124762	9.22239e-06	0.101334	TRUE
Asv004[Corynebacterium (unc.)]	ACNE	Moist	rs7611260	T	C	0.427559	-0.00809688	0.366583	FALSE	32983618	0.0375567	0.105661	6.07852e-06	0.0920509	TRUE
Asv004[Corynebacterium (unc.)]	ACNE	Moist	rs13016626	C	G	0.675625	-0.0027298	0.134447	FALSE	222307116	0.039417	0.149418	5.74958e-06	0.145062	TRUE
Asv004[Corynebacterium (unc.)]	ACNE	Moist	rs1966466	A	G	-0.571635	0.267506	0.387374	FALSE	205170073	0.0104489	0.10447	3.48539e-06	0.116639	TRUE
Asv004[Corynebacterium (unc.)]	ACNE	Moist	rs138852296	A	G	0.764992	0.169922	0.178609	FALSE	52183742	0.00338049	0.0579772	4.48723e-06	0.158383	TRUE
Asv004[Corynebacterium (unc.)]	ACNE	Moist	rs112144830	C	T	0.989148	0.138177	0.0702316	FALSE	58275544	0.0208814	0.0598137	9.26992e-06	0.212789	TRUE
Asv004[Corynebacterium (unc.)]	ACNE	Moist	rs1966466	A	G	-0.571635	-0.0358114	0.387302	FALSE	205170073	0.0218469	0.0156176	3.48539e-06	0.116639	TRUE
Asv004[Corynebacterium (unc.)]	ACNE	Moist	rs72821051	C	G	-1.0013	0.268455	0.0913641	FALSE	33957973	0.0264089	0.120918	7.55485e-06	0.213191	TRUE
Asv004[Corynebacterium (unc.)]	ACNE	Moist	rs62175229	T	C	-0.668862	0.0438309	0.599098	FALSE	159821048	0.047743	0.0221408	1.2662e-06	0.130433	TRUE
Asv004[Corynebacterium (unc.)]	ACNE	Moist	rs112144830	C	T	0.989148	0.029731	0.0701956	FALSE	58275544	0.043463	0.0147239	9.26992e-06	0.212789	TRUE
Asv004[Corynebacterium (unc.)]	ACNE	Moist	rs138852296	A	G	0.764992	-0.225584	0.178623	FALSE	52183742	0.014344	0.0921302	4.48723e-06	0.158383	TRUE
Asv004[Corynebacterium (unc.)]	ACNE	Moist	rs112144830	C	T	0.989148	0.26655	0.0702073	FALSE	58275544	0.039194	0.129259	9.26992e-06	0.212789	TRUE
Asv004[Corynebacterium (unc.)]	ACNE	Moist	rs72821051	C	G	-1.0013	-0.0890066	0.0914016	FALSE	33957973	0.0321004	0.0415305	7.55485e-06	0.213191	TRUE
Asv004[Corynebacterium (unc.)]	ACNE	Moist	rs1583756	C	T	0.820493	0.0348601	0.132528	FALSE	35528445	0.00113599	0.0220324	7.94556e-06	0.174841	TRUE
Asv004[Corynebacterium (unc.)]	ACNE	Moist	rs72821051	C	G	-1.0013	-0.0309607	0.0914302	FALSE	33957973	0.00231447	0.025873	7.55485e-06	0.213191	TRUE
Asv004[Corynebacterium (unc.)]	ACNE	Moist	rs112144830	C	T	0.989148	0.0293862	0.0701675	FALSE	58275544	0.0031517	0.0292565	9.26992e-06	0.212789	TRUE
Asv004[Corynebacterium (unc.)]	ACNE	Moist	rs2714048	C	T	-0.677647	0.0100914	0.566553	FALSE	123474789	0.00503592	0.0150877	3.39732e-07	0.124788	TRUE
Asv004[Corynebacterium (unc.)]	ACNE	Moist	rs138852296	A	G	0.764992	0.0129126	0.178555	FALSE	52183742	0.00508397	0.019525	4.48723e-06	0.158383	TRUE
Asv004[Corynebacterium (unc.)]	ACNE	Moist	rs62175229	T	C	-0.668862	-0.00461115	0.599296	FALSE	159821048	0.00762462	0.015256	1.2662e-06	0.130433	TRUE
Asv004[Corynebacterium (unc.)]	ACNE	Moist	rs1966466	A	G	-0.571635	-0.00347947	0.387348	FALSE	205170073	0.00820228	0.0153111	3.48539e-06	0.116639	TRUE
Asv004[Corynebacterium (unc.)]	ACNE	Moist	rs112144830	C	T	0.989148	0.0305041	0.0698296	FALSE	58275544	0.0033746	0.0221639	9.26992e-06	0.212789	TRUE
Asv004[Corynebacterium (unc.)]	ACNE	Moist	rs138852296	A	G	0.764992	0.0162135	0.178199	FALSE	52183742	0.005451	0.014777	4.48723e-06	0.158383	TRUE
Asv004[Corynebacterium (unc.)]	ACNE	Moist	rs1966466	A	G	-0.571635	0.0112356	0.386789	FALSE	205170073	0.00667994	0.0116299	3.48539e-06	0.116639	TRUE
Asv004[Corynebacterium (unc.)]	ACNE	Moist	rs72821051	C	G	-1.0013	-0.0143769	0.090757	FALSE	33957973	0.00930412	0.0196862	7.55485e-06	0.213191	TRUE
Asv004[Corynebacterium (unc.)]	ACNE	Moist	rs2714048	C	T	-0.677647	0.00815902	0.565728	FALSE	123474789	0.00952116	0.0114487	3.39732e-07	0.124788	TRUE
Asv004[Corynebacterium (unc.)]	ACNE	Moist	rs1583756	C	T	0.820493	-0.0101975	0.13242	FALSE	35528445	0.0107996	0.0166396	7.94556e-06	0.174841	TRUE
Asv004[Corynebacterium (unc.)]	ACNE	Moist	rs62175229	T	C	-0.668862	0.00498714	0.599067	FALSE	159821048	0.0133263	0.0115653	1.2662e-06	0.130433	TRUE
Asv004[Corynebacterium (unc.)]	ACNE	Moist	rs112144830	C	T	0.989148	0.119748	0.0697606	FALSE	58275544	0.000478818	0.0511188	9.26992e-06	0.212789	TRUE
Asv004[Corynebacterium (unc.)]	ACNE	Moist	rs138852296	A	G	0.764992	0.0560272	0.178087	FALSE	52183742	0.00253015	0.0341831	4.48723e-06	0.158383	TRUE
Asv004[Corynebacterium (unc.)]	ACNE	Moist	rs62175229	T	C	-0.668862	0.012774	0.599103	FALSE	159821048	0.0158167	0.0267253	1.2662e-06	0.130433	TRUE
Asv004[Corynebacterium (unc.)]	ACNE	Moist	rs72821051	C	G	-1.0013	0.0199545	0.0907931	FALSE	33957973	0.0164959	0.0453368	7.55485e-06	0.213191	TRUE
Asv004[Corynebacterium (unc.)]	ACNE	Moist	rs2714048	C	T	-0.677647	0.00996346	0.565468	FALSE	123474789	0.0176634	0.0264624	3.39732e-07	0.124788	TRUE
Asv004[Corynebacterium (unc.)]	ACNE	Moist	rs1966466	A	G	-0.571635	0.00968295	0.386697	FALSE	205170073	0.0179619	0.02686	3.48539e-06	0.116639	TRUE
Asv004[Corynebacterium (unc.)]	ACNE	Moist	rs1583756	C	T	0.820493	0.00146051	0.132416	FALSE	35528445	0.0242411	0.0383764	7.94556e-06	0.174841	TRUE
Asv004[Corynebacterium (unc.)]	ACNE	Moist	rs138852296	A	G	0.764992	-0.0796032	0.177879	FALSE	52183742	0.000598713	0.0336387	4.48723e-06	0.158383	TRUE
Asv004[Corynebacterium (unc.)]	ACNE	Moist	rs2714048	C	T	-0.677647	0.054217	0.565597	FALSE	123474789	0.00122953	0.0259781	3.39732e-07	0.124788	TRUE
Asv004[Corynebacterium (unc.)]	ACNE	Moist	rs1966466	A	G	-0.571635	0.0488928	0.386792	FALSE	205170073	0.00212598	0.0263755	3.48539e-06	0.116639	TRUE
Asv013[S. Epidermidis]	ACNE	Moist	rs72821051	C	G	-1.0013	-0.0719593	0.0907175	FALSE	33957973	0.0035208	0.0444693	7.55485e-06	0.213191	TRUE
Asv013[S. Epidermidis]	ACNE	Moist	rs62175229	T	C	-0.668862	0.0202915	0.599135	FALSE	159821048	0.0146642	0.0262736	1.2662e-06	0.130433	TRUE
Asv013[S. Epidermidis]	ACNE	Moist	rs1583756	C	T	0.820493	0.0275829	0.132443	FALSE	35528445	0.0155057	0.0377664	7.94556e-06	0.174841	TRUE
Asv013[S. Epidermidis]	ACNE	Moist	rs112144830	C	T	0.989148	0.027807	0.0697	FALSE	58275544	0.0193565	0.050341	9.26992e-06	0.212789	TRUE
Asv013[S. Epidermidis]	ACNE	Moist	rs9514997	G	A	-0.583054	-0.0731275	0.176944	FALSE	109159163	0.0409138	0.0357697	7.17268e-06	0.126443	TRUE
Asv013[S. Epidermidis]	ACNE	Moist	rs2722313	G	A	-0.861561	-0.114269	0.844045	FALSE	37862887	0.0108455	0.0448528	1.92035e-06	0.175551	TRUE
Asv013[S. Epidermidis]	ACNE	Moist	rs112247259	T	C	-0.510929	-0.45812	0.129029	FALSE	146781301	0.0117593	0.181845	8.72325e-06	0.111899	TRUE
Asv013[S. Epidermidis]	ACNE	Moist	rs9901397	A	G	0.46618	0.0601338	0.419103	FALSE	14565848	0.0310034	0.0278781	7.66165e-06	0.101432	TRUE
Asv013[S. Epidermidis]	ACNE	Moist	rs112247259	T	C	-0.510929	0.0487661	0.129018	FALSE	146781301	0.0275645	0.0221319	8.72325e-06	0.111899	TRUE
Asv013[S. Epidermidis]	ACNE	Moist	rs4000736	G	A	-0.46031	-0.0323098	0.638785	FALSE	92501859	0.0361718	0.0154224	9.39857e-06	0.101197	TRUE
Asv013[S. Epidermidis]	ACNE	Moist	rs9901397	A	G	0.46618	0.195232	0.419164	FALSE	14565848	0.00429408	0.0683654	7.66165e-06	0.101432	TRUE
Asv013[S. Epidermidis]	ACNE	Moist	rs9514997	G	A	-0.583054	0.202244	0.177108	FALSE	109159163	0.02852	0.0923462	7.17268e-06	0.126443	TRUE
Asv013[S. Epidermidis]	ACNE	Moist	rs6027553	C	T	0.465516	0.0392925	0.354321	FALSE	60368123	0.0459082	0.0196832	2.96738e-06	0.0967552	TRUE
Asv013[S. Epidermidis]	ACNE	Moist	rs112247259	T	C	-0.510929	-0.0560059	0.128995	FALSE	146781301	0.0474253	0.0282504	8.72325e-06	0.111899	TRUE
Asv013[S. Epidermidis]	ACNE	Moist	rs4654254	G	A	0.508742	0.0835218	0.214331	FALSE	246446974	0.00134785	0.026055	9.46593e-06	0.111885	TRUE
Asv013[S. Epidermidis]	ACNE	Moist	rs56839549	G	A	0.658742	-0.108669	0.121196	FALSE	50812717	0.0199591	0.0466966	9.85538e-06	0.145174	TRUE
Asv013[S. Epidermidis]	ACNE	Moist	rs2386584	G	T	-0.462372	-0.179496	0.41428	FALSE	90996342	0.0121169	0.0715487	7.72922e-06	0.100648	TRUE
Asv013[S. Epidermidis]	ACNE	Moist	rs4654254	G	A	0.508742	0.140994	0.214057	FALSE	246446974	0.045221	0.0704055	9.46593e-06	0.111885	TRUE
Asv013[S. Epidermidis]	ACNE	Moist	rs9901397	A	G	0.46618	0.183267	0.419037	FALSE	14565848	0.0281903	0.083507	7.66165e-06	0.101432	TRUE
Asv013[S. Epidermidis]	ACNE	Moist	rs2386584	G	T	-0.462372	0.137441	0.414524	FALSE	90996342	0.0343875	0.0649685	7.72922e-06	0.100648	TRUE
Asv013[S. Epidermidis]	ACNE	Moist	rs6027553	C	T	0.465516	-0.221496	0.354197	FALSE	60368123	0.043422	0.109672	2.96738e-06	0.0967552	TRUE
Asv013[S. Epidermidis]	ACNE	Moist	rs56839549	G	A	0.658742	0.0486544	0.121149	FALSE	50812717	0.0336217	0.0229007	9.85538e-06	0.145174	TRUE
Asv013[S. Epidermidis]	ACNE	Moist	rs2722313	G	A	-0.861561	-0.0279189	0.844031	FALSE	37862887	0.00177252	0.020692	1.92035e-06	0.175551	TRUE
Asv013[S. Epidermidis]	ACNE	Moist	rs112247259	T	C	-0.510929	0.0259518	0.129071	FALSE	146781301	0.00244039	0.0222772	8.72325e-06	0.111899	TRUE
Asv013[S. Epidermidis]	ACNE	Moist	rs9901397	A	G	0.46618	-0.0131688	0.419036	FALSE	14565848	0.00385519	0.0151754	7.66165e-06	0.101432	TRUE
Asv013[S. Epidermidis]	ACNE	Moist	rs4000736	G	A	-0.46031	0.0073782	0.638758	FALSE	92501859	0.00635382	0.0155604	9.39857e-06	0.101197	TRUE
Asv013[S. Epidermidis]	ACNE	Moist	rs6027553	C	T	0.465516	0.00592949	0.354235	FALSE	60368123	0.00705128	0.0156696	2.96738e-06	0.0967552	TRUE
Asv013[S. Epidermidis]	ACNE	Moist	rs9514997	G	A	-0.583054	-0.00587665	0.177133	FALSE	109159163	0.00766353	0.0197768	7.17268e-06	0.126443	TRUE
Asv013[S. Epidermidis]	ACNE	Moist	rs2386584	G	T	-0.462372	0.00305124	0.4145	FALSE	90996342	0.008404	0.0151515	7.72922e-06	0.100648	TRUE
Asv013[S. Epidermidis]	ACNE	Moist	rs4654254	G	A	0.508742	-0.00336917	0.213999	FALSE	246446974	0.00853595	0.0182578	9.46593e-06	0.111885	TRUE
Asv013[S. Epidermidis]	ACNE	Moist	rs4000736	G	A	-0.46031	-0.0238216	0.638908	FALSE	92501859	0.000876194	0.0118168	9.39857e-06	0.101197	TRUE
Asv013[S. Epidermidis]	ACNE	Moist	rs2386584	G	T	-0.462372	-0.0169721	0.415398	FALSE	90996342	0.00278062	0.0114722	7.72922e-06	0.100648	TRUE
Asv013[S. Epidermidis]	ACNE	Moist	rs6027553	C	T	0.465516	0.0160185	0.354905	FALSE	60368123	0.00352242	0.011841	2.96738e-06	0.0967552	TRUE
Asv013[S. Epidermidis]	ACNE	Moist	rs112247259	T	C	-0.510929	-0.0199237	0.128784	FALSE	146781301	0.00471526	0.0168041	8.72325e-06	0.111899	TRUE
Asv013[S. Epidermidis]	ACNE	Moist	rs9514997	G	A	-0.583054	0.0108755	0.177697	FALSE	109159163	0.00931528	0.0149105	7.17268e-06	0.126443	TRUE
Asv013[S. Epidermidis]	ACNE	Moist	rs9901397	A	G	0.46618	-0.00726419	0.419194	FALSE	14565848	0.0105533	0.0115017	7.66165e-06	0.101432	TRUE
Asv013[S. Epidermidis]	ACNE	Moist	rs56839549	G	A	0.658742	0.0108478	0.12111	FALSE	50812717	0.0106708	0.0174231	9.85538e-06	0.145174	TRUE
Asv021[Micrococcus (unc.)]	ACNE	Moist	rs2722313	G	A	-0.861561	-0.00437511	0.843828	FALSE	37862887	0.0156109	0.0157036	1.92035e-06	0.175551	TRUE
Asv021[Micrococcus (unc.)]	ACNE	Moist	rs4654254	G	A	0.508742	0.000515821	0.213805	FALSE	246446974	0.0194063	0.0138606	9.46593e-06	0.111885	TRUE
Asv021[Micrococcus (unc.)]	ACNE	Moist	rs4000736	G	A	-0.46031	0.0405399	0.639216	FALSE	92501859	0.0034462	0.0273207	9.39857e-06	0.101197	TRUE
Asv021[Micrococcus (unc.)]	ACNE	Moist	rs4654254	G	A	0.508742	0.0471707	0.213909	FALSE	246446974	0.00352448	0.0320419	9.46593e-06	0.111885	TRUE
Asv021[Micrococcus (unc.)]	ACNE	Moist	rs112247259	T	C	-0.510929	-0.0501573	0.128697	FALSE	146781301	0.00488085	0.038724	8.72325e-06	0.111899	TRUE
Asv021[Micrococcus (unc.)]	ACNE	Moist	rs56839549	G	A	0.658742	-0.0495044	0.121073	FALSE	50812717	0.00547545	0.0402755	9.85538e-06	0.145174	TRUE
Asv021[Micrococcus (unc.)]	ACNE	Moist	rs2722313	G	A	-0.861561	0.0312316	0.843895	FALSE	37862887	0.00977173	0.0363987	1.92035e-06	0.175551	TRUE
Asv021[Micrococcus (unc.)]	ACNE	Moist	rs6027553	C	T	0.465516	0.0191941	0.354725	FALSE	60368123	0.0121026	0.0274311	2.96738e-06	0.0967552	TRUE
Asv021[Micrococcus (unc.)]	ACNE	Moist	rs9901397	A	G	0.46618	-0.0123628	0.419325	FALSE	14565848	0.0160474	0.026584	7.66165e-06	0.101432	TRUE
Asv021[Micrococcus (unc.)]	ACNE	Moist	rs9514997	G	A	-0.583054	0.0134672	0.177487	FALSE	109159163	0.0174361	0.03464	7.17268e-06	0.126443	TRUE
Asv021[Micrococcus (unc.)]	ACNE	Moist	rs2386584	G	T	-0.462372	0.00552637	0.415657	FALSE	90996342	0.0208735	0.0265218	7.72922e-06	0.100648	TRUE
Asv021[Micrococcus (unc.)]	ACNE	Moist	rs112247259	T	C	-0.510929	-0.0821696	0.128665	FALSE	146781301	0.00102235	0.0380183	8.72325e-06	0.111899	TRUE
Asv021[Micrococcus (unc.)]	ACNE	Moist	rs2386584	G	T	-0.462372	-0.0421834	0.415531	FALSE	90996342	0.00351233	0.0260494	7.72922e-06	0.100648	TRUE
Asv021[Micrococcus (unc.)]	ACNE	Moist	rs9901397	A	G	0.46618	-0.0408232	0.419257	FALSE	14565848	0.00394743	0.0261448	7.66165e-06	0.101432	TRUE
Asv021[Micrococcus (unc.)]	ACNE	Moist	rs56839549	G	A	0.658742	0.0449333	0.121167	FALSE	50812717	0.00855987	0.0396239	9.85538e-06	0.145174	TRUE
Asv021[Micrococcus (unc.)]	ACNE	Moist	rs6027553	C	T	0.465516	0.0295274	0.35476	FALSE	60368123	0.00906183	0.0268723	2.96738e-06	0.0967552	TRUE
Asv021[Micrococcus (unc.)]	ACNE	Moist	rs4654254	G	A	0.508742	-0.0262512	0.213777	FALSE	246446974	0.01352	0.0315648	9.46593e-06	0.111885	TRUE
Asv021[Micrococcus (unc.)]	ACNE	Moist	rs2722313	G	A	-0.861561	-0.0227746	0.843827	FALSE	37862887	0.0174943	0.0358137	1.92035e-06	0.175551	TRUE
Asv021[Micrococcus (unc.)]	ACNE	Moist	rs4000736	G	A	-0.46031	0.00947572	0.639161	FALSE	92501859	0.0241401	0.0268551	9.39857e-06	0.101197	TRUE
Asv021[Micrococcus (unc.)]	ACNE	Moist	rs9514997	G	A	-0.583054	0.000203521	0.177493	FALSE	109159163	0.0331738	0.0339386	7.17268e-06	0.126443	TRUE
Asv021[Micrococcus (unc.)]	ACNE	Moist	rs1938266	C	G	0.609748	0.0593444	0.312262	FALSE	118252059	0.0014474	0.0293838	2.31e-06	0.122571	TRUE
Asv021[Micrococcus (unc.)]	ACNE	Moist	rs13070959	T	C	1.13905	0.058871	0.140029	FALSE	46549871	0.00435913	0.0389601	2.91e-06	0.231494	TRUE
Asv021[Micrococcus (unc.)]	ACNE	Moist	rs4923510	T	C	-0.733793	0.0388763	0.932946	FALSE	27920589	0.0159139	0.0547198	9.55e-06	0.15837	TRUE
Asv021[Micrococcus (unc.)]	ACNE	Moist	rs7639856	A	G	1.09215	-0.0288412	0.0747024	FALSE	148840264	0.0192586	0.0518109	7.95e-06	0.233451	TRUE
Asv021[Micrococcus (unc.)]	ACNE	Moist	rs4947971	C	T	-0.71292	0.0149106	0.668715	FALSE	55093302	0.0201941	0.028894	3.15e-06	0.145451	TRUE
Asv021[Micrococcus (unc.)]	ACNE	Moist	rs4732754	T	C	0.555921	0.0116119	0.455745	FALSE	27792911	0.0223565	0.0273096	4.37e-06	0.115256	TRUE
Asv021[Micrococcus (unc.)]	ACNE	Moist	rs676990	C	T	-0.951228	-0.0149163	0.843027	FALSE	28955959	0.0230073	0.0374255	8.72e-06	0.204319	TRUE
Asv021[Micrococcus (unc.)]	ACNE	Moist	rs13003148	G	T	-0.760006	0.0133681	0.144569	FALSE	182348050	0.0243421	0.0387732	9.11e-06	0.163618	TRUE
Asv021[Micrococcus (unc.)]	ACNE	Moist	rs60376099	G	C	1.199	-0.0118628	0.119056	FALSE	72566003	0.02596	0.042234	3.03e-08	0.201677	TRUE
Asv021[Micrococcus (unc.)]	ACNE	Moist	rs11656638	A	G	1.19512	-0.00953249	0.0991241	FALSE	14398810	0.0278073	0.0455461	5.77e-06	0.251269	TRUE
Asv021[Micrococcus (unc.)]	ACNE	Moist	rs17160710	T	G	1.46326	0.0104768	0.0754415	FALSE	107902401	0.027981	0.0517058	1.06e-06	0.283769	TRUE
Asv021[Micrococcus (unc.)]	ACNE	Moist	rs61732241	T	C	1.16879	-0.00546829	0.112651	FALSE	119031800	0.0299642	0.0430511	4.52e-07	0.218425	TRUE
Asv021[Micrococcus (unc.)]	ACNE	Moist	rs61732241	T	C	1.16879	0.278604	0.112735	FALSE	119031800	0.0034015	0.161774	4.51826e-07	0.218425	TRUE
Asv021[Micrococcus (unc.)]	ACNE	Moist	rs676990	C	T	-0.951228	0.223321	0.842714	FALSE	28955959	0.00445504	0.140273	8.72349e-06	0.204319	TRUE
Asv021[Micrococcus (unc.)]	ACNE	Moist	rs13070959	T	C	1.13905	0.227057	0.140159	FALSE	46549871	0.00486728	0.146701	2.90611e-06	0.231494	TRUE
Asv021[Micrococcus (unc.)]	ACNE	Moist	rs17160710	T	G	1.46326	-0.198956	0.0750273	FALSE	107902401	0.0122404	0.194363	1.05885e-06	0.283769	TRUE
Asv021[Micrococcus (unc.)]	ACNE	Moist	rs4732754	T	C	0.555921	0.104159	0.456306	FALSE	27792911	0.0122483	0.101796	4.36654e-06	0.115256	TRUE
Asv023[C. Kroppenstedtii]	ACNE	Dry	rs11656638	A	G	1.19512	-0.159265	0.0984814	FALSE	14398810	0.0139866	0.170294	5.76734e-06	0.251269	TRUE
Asv023[C. Kroppenstedtii]	ACNE	Dry	rs13003148	G	T	-0.760006	-0.107399	0.144962	FALSE	182348050	0.0183073	0.144613	9.10926e-06	0.163618	TRUE
Asv023[C. Kroppenstedtii]	ACNE	Dry	rs4947971	C	T	-0.71292	0.0714042	0.667976	FALSE	55093302	0.0203388	0.107988	3.14788e-06	0.145451	TRUE
Asv023[C. Kroppenstedtii]	ACNE	Dry	rs1938266	C	G	0.609748	-0.0551469	0.312751	FALSE	118252059	0.0246015	0.109659	2.31012e-06	0.122571	TRUE
Asv023[C. Kroppenstedtii]	ACNE	Dry	rs60376099	G	C	1.199	0.0716891	0.11912	FALSE	72566003	0.0259412	0.15728	3.02822e-08	0.201677	TRUE
Asv023[C. Kroppenstedtii]	ACNE	Dry	rs7639856	A	G	1.09215	-0.0541554	0.0744149	FALSE	148840264	0.0312306	0.19458	7.95108e-06	0.233451	TRUE
Asv023[C. Kroppenstedtii]	ACNE	Dry	rs4923510	T	C	-0.733793	-0.0373551	0.933303	FALSE	27920589	0.0341738	0.203484	9.55035e-06	0.15837	TRUE
Asv023[C. Kroppenstedtii]	ACNE	Dry	rs78914669	A	G	0.933106	0.100363	0.0511488	FALSE	177371588	0.0035356	0.0621012	5.88e-06	0.200179	TRUE
Asv023[C. Kroppenstedtii]	ACNE	Dry	rs1994654	A	G	-0.550263	-0.0370053	0.188872	FALSE	127660596	0.00975627	0.035168	5.86e-06	0.118023	TRUE
Asv023[C. Kroppenstedtii]	ACNE	Dry	rs1721087	C	T	0.602195	-0.0443442	0.113604	FALSE	16989317	0.0102289	0.0433973	3.63e-06	0.126215	TRUE
Asv023[C. Kroppenstedtii]	ACNE	Dry	rs55904893	A	G	-0.886002	-0.0738113	0.0367428	FALSE	25384317	0.0104403	0.0731885	8.3e-06	0.193366	TRUE
Asv023[C. Kroppenstedtii]	ACNE	Dry	rs10122206	A	G	0.616585	-0.0373724	0.106153	FALSE	21674068	0.013605	0.0451819	4.26e-06	0.130213	TRUE
Asv023[C. Kroppenstedtii]	ACNE	Dry	rs1325372	T	C	-0.609051	0.0243397	0.731002	FALSE	107981363	0.0142863	0.0307471	3.4e-06	0.127254	TRUE
Asv023[C. Kroppenstedtii]	ACNE	Dry	rs76411989	C	T	0.765731	-0.030859	0.090757	FALSE	39687347	0.0172106	0.0475463	5.75e-06	0.164091	TRUE
Asv023[C. Kroppenstedtii]	ACNE	Dry	rs6576284	A	G	0.509884	-0.00646761	0.324057	FALSE	20578653	0.0274978	0.0292383	8.06e-06	0.111111	TRUE
Asv023[C. Kroppenstedtii]	ACNE	Dry	rs1994654	A	G	-0.550263	-0.298234	0.188984	FALSE	127660596	0.000999012	0.133034	5.85958e-06	0.118023	TRUE
Asv023[C. Kroppenstedtii]	ACNE	Dry	rs1721087	C	T	0.602195	0.314045	0.113201	FALSE	16989317	0.00216501	0.16307	3.63012e-06	0.126215	TRUE
Asv023[C. Kroppenstedtii]	ACNE	Dry	rs10122206	A	G	0.616585	0.32403	0.105481	FALSE	21674068	0.00225938	0.169891	4.25609e-06	0.130213	TRUE
Asv023[C. Kroppenstedtii]	ACNE	Dry	rs76411989	C	T	0.765731	0.311569	0.0903584	FALSE	39687347	0.0031007	0.176499	5.75344e-06	0.164091	TRUE
Asv023[C. Kroppenstedtii]	ACNE	Dry	rs6576284	A	G	0.509884	-0.0434556	0.324024	FALSE	20578653	0.0276348	0.109275	8.05563e-06	0.111111	TRUE
Asv023[C. Kroppenstedtii]	ACNE	Dry	rs55904893	A	G	-0.886002	-0.0893803	0.0364029	FALSE	25384317	0.029569	0.268507	8.30075e-06	0.193366	TRUE
Asv023[C. Kroppenstedtii]	ACNE	Dry	rs78914669	A	G	0.933106	-0.0753913	0.0512598	FALSE	177371588	0.0298246	0.232382	5.8845e-06	0.200179	TRUE
Asv023[C. Kroppenstedtii]	ACNE	Dry	rs1325372	T	C	-0.609051	0.012753	0.729822	FALSE	107981363	0.0364674	0.114981	3.39756e-06	0.127254	TRUE
Asv023[C. Kroppenstedtii]	ACNE	Dry	rs10513846	A	G	0.683756	0.0439806	0.200823	FALSE	190313200	0.0066778	0.0343437	8.37e-06	0.148938	TRUE
Asv023[C. Kroppenstedtii]	ACNE	Dry	rs140375257	G	A	0.856462	-0.0373915	0.0755406	FALSE	37207808	0.0157227	0.051951	9.74e-06	0.188005	TRUE
Asv023[C. Kroppenstedtii]	ACNE	Dry	rs2939848	T	C	0.566564	0.0212597	0.247145	FALSE	90075849	0.016754	0.0317132	3.38e-06	0.118042	TRUE
Asv023[C. Kroppenstedtii]	ACNE	Dry	rs10463984	A	G	0.468649	0.0160777	0.327961	FALSE	102541428	0.0192653	0.0288976	9.89e-06	0.102958	TRUE
Asv023[C. Kroppenstedtii]	ACNE	Dry	rs2577903	A	G	-0.690154	0.0131026	0.8241	FALSE	64416956	0.0238803	0.0360693	1.55e-06	0.138762	TRUE
Asv023[C. Kroppenstedtii]	ACNE	Dry	rs9944797	T	C	0.531691	0.00923021	0.311443	FALSE	14471770	0.0252149	0.0297604	7.67e-06	0.115298	TRUE
Asv023[C. Kroppenstedtii]	ACNE	Dry	rs12675846	A	G	0.4841	0.00874322	0.367565	FALSE	55934986	0.0252375	0.0282715	6.28e-06	0.103934	TRUE
Asv023[C. Kroppenstedtii]	ACNE	Dry	rs10513846	A	G	0.683756	-0.263246	0.201094	FALSE	190313200	0.00161804	0.128468	8.37266e-06	0.148938	TRUE
Asv023[C. Kroppenstedtii]	ACNE	Dry	rs9944797	T	C	0.531691	0.120462	0.311592	FALSE	14471770	0.0111803	0.111391	7.66689e-06	0.115298	TRUE
Asv023[C. Kroppenstedtii]	ACNE	Dry	rs2577903	A	G	-0.690154	0.0943136	0.825336	FALSE	64416956	0.0193802	0.134912	1.55305e-06	0.138762	TRUE
Asv023[C. Kroppenstedtii]	ACNE	Dry	rs12675846	A	G	0.4841	0.021694	0.367375	FALSE	55934986	0.0334924	0.105651	6.28001e-06	0.103934	TRUE
Asv023[C. Kroppenstedtii]	ACNE	Dry	rs2939848	T	C	0.566564	-0.023933	0.247102	FALSE	90075849	0.0335597	0.117791	3.37898e-06	0.118042	TRUE
Asv023[C. Kroppenstedtii]	ACNE	Dry	rs10463984	A	G	0.468649	0.0166477	0.327774	FALSE	102541428	0.0351106	0.108239	9.88845e-06	0.102958	TRUE
Asv023[C. Kroppenstedtii]	ACNE	Dry	rs140375257	G	A	0.856462	0.00566994	0.0753855	FALSE	37207808	0.0390691	0.194367	9.73526e-06	0.188005	TRUE
Asv037[E. Aerosaccus]	ACNE	Dry	rs1565790	A	G	0.410205	-0.0265009	0.437143	FALSE	580998	0.0215819	0.0115339	3.93008e-06	0.0866694	TRUE
Asv037[E. Aerosaccus]	ACNE	Dry	rs7088058	T	C	-0.423822	-0.143357	0.290304	FALSE	122389836	0.00562756	0.051777	4.76918e-06	0.0903745	TRUE
Asv037[E. Aerosaccus]	ACNE	Dry	rs2286900	A	G	0.668374	0.11063	0.108566	FALSE	150720957	0.0398456	0.0538254	4.86595e-06	0.14266	TRUE
Asv037[E. Aerosaccus]	ACNE	Dry	rs7088058	T	C	-0.423822	-0.0664354	0.290294	FALSE	122389836	0.0467132	0.0334032	4.76918e-06	0.0903745	TRUE
Asv037[E. Aerosaccus]	ACNE	Dry	rs1565790	A	G	0.410205	-0.073561	0.437153	FALSE	580998	0.000168093	0.0195501	3.93008e-06	0.0866694	TRUE
Asv037[E. Aerosaccus]	ACNE	Dry	rs7145860	T	C	-0.667623	0.0739888	0.906894	FALSE	57402118	0.0474766	0.0373299	1.79714e-06	0.136099	TRUE
Asv037[E. Aerosaccus]	ACNE	Dry	rs7145860	T	C	-0.667623	0.127012	0.906883	FALSE	57402118	0.0155665	0.0525079	1.79714e-06	0.136099	TRUE
Asv037[E. Aerosaccus]	ACNE	Dry	rs2286900	A	G	0.668374	-0.0326463	0.108569	FALSE	150720957	0.00696627	0.0120982	4.86595e-06	0.14266	TRUE
Asv037[E. Aerosaccus]	ACNE	Dry	rs28375892	T	G	0.80793	0.386135	0.0392026	FALSE	35449537	0.035416	0.183562	7.2654e-06	0.175858	TRUE
Asv037[E. Aerosaccus]	ACNE	Dry	rs28375892	T	G	0.80793	0.337615	0.0391894	FALSE	35449537	0.0236042	0.149156	7.2654e-06	0.175858	TRUE
Asv037[E. Aerosaccus]	ACNE	Dry	rs7145860	T	C	-0.667623	0.0342299	0.90684	FALSE	57402118	0.00182868	0.0256986	1.79714e-06	0.136099	TRUE
Asv037[E. Aerosaccus]	ACNE	Dry	rs7088058	T	C	-0.423822	-0.0121645	0.29011	FALSE	122389836	0.00460548	0.0164843	4.76918e-06	0.0903745	TRUE
Asv037[E. Aerosaccus]	ACNE	Dry	rs1565790	A	G	0.410205	0.00935021	0.437041	FALSE	580998	0.00535483	0.0150893	3.93008e-06	0.0866694	TRUE
Asv037[E. Aerosaccus]	ACNE	Dry	rs2828007	C	G	0.431137	-0.00532017	0.547995	FALSE	23278937	0.00723271	0.0150249	1.14163e-06	0.0861689	TRUE
Asv037[E. Aerosaccus]	ACNE	Dry	rs2286900	A	G	0.668374	0.00211151	0.108636	FALSE	150720957	0.00929912	0.0240066	4.86595e-06	0.14266	TRUE
Asv037[E. Aerosaccus]	ACNE	Dry	rs28375892	T	G	0.80793	-0.000255672	0.0391485	FALSE	35449537	0.00994755	0.0388907	7.2654e-06	0.175858	TRUE
Asv037[E. Aerosaccus]	ACNE	Dry	rs1565790	A	G	0.410205	-0.0296906	0.436955	FALSE	580998	0.000188777	0.0114382	3.93008e-06	0.0866694	TRUE
Asv037[E. Aerosaccus]	ACNE	Dry	rs28375892	T	G	0.80793	0.0257884	0.039079	FALSE	35449537	0.00768886	0.0296507	7.2654e-06	0.175858	TRUE
Asv037[E. Aerosaccus]	ACNE	Dry	rs2286900	A	G	0.668374	-0.0146572	0.108287	FALSE	150720957	0.00841648	0.0182079	4.86595e-06	0.14266	TRUE
Asv037[E. Aerosaccus]	ACNE	Dry	rs2828007	C	G	0.431137	0.0071051	0.5481	FALSE	23278937	0.0106582	0.0113942	1.14163e-06	0.0861689	TRUE
Asv037[E. Aerosaccus]	ACNE	Dry	rs7145860	T	C	-0.667623	0.00851534	0.906848	FALSE	57402118	0.0132506	0.0195115	1.79714e-06	0.136099	TRUE
Asv037[E. Aerosaccus]	ACNE	Dry	rs7088058	T	C	-0.423822	0.00280816	0.290056	FALSE	122389836	0.0164385	0.0124768	4.76918e-06	0.0903745	TRUE
Asv037[E. Aerosaccus]	ACNE	Dry	rs28375892	T	G	0.80793	0.17383	0.0391183	FALSE	35449537	0.000179804	0.0646734	7.2654e-06	0.175858	TRUE
Asv037[E. Aerosaccus]	ACNE	Dry	rs7145860	T	C	-0.667623	-0.0763608	0.906699	FALSE	57402118	0.00223651	0.0449645	1.79714e-06	0.136099	TRUE
Asv037[E. Aerosaccus]	ACNE	Dry	rs7088058	T	C	-0.423822	-0.0472511	0.289823	FALSE	122389836	0.00253503	0.0288451	4.76918e-06	0.0903745	TRUE
Asv037[E. Aerosaccus]	ACNE	Dry	rs2286900	A	G	0.668374	0.0528595	0.108415	FALSE	150720957	0.00518785	0.0419377	4.86595e-06	0.14266	TRUE
Asv037[E. Aerosaccus]	ACNE	Dry	rs1565790	A	G	0.410205	0.0317257	0.437422	FALSE	580998	0.00574715	0.0264237	3.93008e-06	0.0866694	TRUE
Asv037[E. Aerosaccus]	ACNE	Dry	rs2828007	C	G	0.431137	-0.0123541	0.548045	FALSE	23278937	0.0159655	0.0263061	1.14163e-06	0.0861689	TRUE
Asv037[E. Aerosaccus]	ACNE	Dry	rs2828007	C	G	0.431137	0.0442933	0.54818	FALSE	23278937	0.0028926	0.0258625	1.14163e-06	0.0861689	TRUE
Asv037[E. Aerosaccus]	ACNE	Dry	rs2286900	A	G	0.668374	-0.0576282	0.108295	FALSE	150720957	0.00544463	0.0413423	4.86595e-06	0.14266	TRUE
Asv037[E. Aerosaccus]	ACNE	Dry	rs7145860	T	C	-0.667623	-0.0552654	0.906732	FALSE	57402118	0.00710473	0.0443909	1.79714e-06	0.136099	TRUE
Asv037[E. Aerosaccus]	ACNE	Dry	rs1565790	A	G	0.410205	-0.0100849	0.437342	FALSE	580998	0.0232618	0.0259773	3.93008e-06	0.0866694	TRUE
Asv037[E. Aerosaccus]	ACNE	Dry	rs28375892	T	G	0.80793	0.00521052	0.0390399	FALSE	35449537	0.0312932	0.0678612	7.2654e-06	0.175858	TRUE
Asv037[E. Aerosaccus]	ACNE	Dry	rs7088058	T	C	-0.423822	0.000513652	0.289923	FALSE	122389836	0.0328508	0.0283097	4.76918e-06	0.0903745	TRUE
Asv037[E. Aerosaccus]	ACNE	Dry	rs7310291	T	C	0.68488	0.0540505	0.808025	FALSE	68086733	0.0038663	0.0343869	7.79e-06	0.146353	TRUE
Asv037[E. Aerosaccus]	ACNE	Dry	rs2067979	T	G	-0.586821	-0.0445253	0.312018	FALSE	18882580	0.00433	0.0293994	6.81e-06	0.124531	TRUE
Asv037[E. Aerosaccus]	ACNE	Dry	rs7247186	C	T	-0.565914	-0.0397671	0.555244	FALSE	30809748	0.0048548	0.0273297	5.39e-06	0.118677	TRUE
Asv053[Streptococcus (unc.)]	ACNE	Dry	rs12696470	C	T	-0.775761	0.0381095	0.850922	FALSE	179271470	0.0106559	0.0382963	6.49e-06	0.164221	TRUE
Asv053[Streptococcus (unc.)]	ACNE	Dry	rs11636481	T	C	1.0111	-0.0457824	0.0778458	FALSE	36867180	0.0122532	0.0508136	5.88e-06	0.212959	TRUE
Asv053[Streptococcus (unc.)]	ACNE	Dry	rs12291726	G	A	-0.710549	-0.0109461	0.198204	FALSE	78377164	0.0249071	0.0339609	4.56e-06	0.147762	TRUE
Asv053[Streptococcus (unc.)]	ACNE	Dry	rs12291726	G	A	-0.710549	-0.305478	0.19892	FALSE	78377164	0.000654516	0.127244	4.56224e-06	0.147762	TRUE
Asv053[Streptococcus (unc.)]	ACNE	Dry	rs7247186	C	T	-0.565914	-0.0891908	0.555219	FALSE	30809748	0.0152988	0.102124	5.39376e-06	0.118677	TRUE
Asv053[Streptococcus (unc.)]	ACNE	Dry	rs7310291	T	C	0.68488	0.0869037	0.808457	FALSE	68086733	0.0199895	0.128765	7.78572e-06	0.146353	TRUE
Asv053[Streptococcus (unc.)]	ACNE	Dry	rs11636481	T	C	1.0111	-0.113626	0.0776359	FALSE	36867180	0.0218329	0.188113	5.8762e-06	0.212959	TRUE
Asv053[Streptococcus (unc.)]	ACNE	Dry	rs12696470	C	T	-0.775761	0.0765553	0.851177	FALSE	179271470	0.0235955	0.142032	6.48895e-06	0.164221	TRUE
Asv053[Streptococcus (unc.)]	ACNE	Dry	rs2067979	T	G	-0.586821	0.0223264	0.311725	FALSE	18882580	0.0335715	0.110088	6.80879e-06	0.124531	TRUE
Asv053[Streptococcus (unc.)]	ACNE	Dry	rs11619782	A	G	0.762383	-0.257152	0.220008	FALSE	43030022	0.0375154	0.123624	2.0606e-06	0.152957	TRUE
Asv053[Streptococcus (unc.)]	ACNE	Dry	rs61025394	A	G	0.696151	-0.0603512	0.266803	FALSE	7085584	0.0496615	0.0307464	8.14172e-06	0.149391	TRUE
Asv053[Streptococcus (unc.)]	ACNE	Dry	rs11619782	A	G	0.762383	-0.0362938	0.219896	FALSE	43030022	0.00908092	0.013911	2.0606e-06	0.152957	TRUE
Asv053[Streptococcus (unc.)]	ACNE	Dry	rs17032739	T	C	0.858281	0.104418	0.0735235	FALSE	106272925	0.0466939	0.0524961	9.07854e-06	0.185616	TRUE
Asv053[Streptococcus (unc.)]	ACNE	Dry	rs61025394	A	G	0.696151	-0.0653471	0.26663	FALSE	7085584	0.0356254	0.0311002	8.14172e-06	0.149391	TRUE
Asv053[Streptococcus (unc.)]	ACNE	Dry	rs17032739	T	C	0.858281	-0.141053	0.0735313	FALSE	106272925	0.0134971	0.057098	9.07854e-06	0.185616	TRUE
Asv053[Streptococcus (unc.)]	ACNE	Dry	rs6893166	T	G	-1.07907	0.316725	0.107465	FALSE	143897836	0.0464301	0.159042	4.63663e-06	0.225438	TRUE
Asv053[Streptococcus (unc.)]	ACNE	Dry	rs11619782	A	G	0.762383	-0.0535655	0.220041	FALSE	43030022	0.0223908	0.0234559	2.0606e-06	0.152957	TRUE
Asv053[Streptococcus (unc.)]	ACNE	Dry	rs169074	T	A	0.638267	-0.0517417	0.164149	FALSE	65874315	0.0484462	0.0262191	2.5466e-06	0.129337	TRUE
Asv053[Streptococcus (unc.)]	ACNE	Dry	rs11619782	A	G	0.762383	-0.0182814	0.219896	FALSE	43030022	0.0432753	0.00904552	2.0606e-06	0.152957	TRUE
Asv053[Streptococcus (unc.)]	ACNE	Dry	rs6893166	T	G	-1.07907	0.315398	0.107287	FALSE	143897836	0.0179697	0.133291	4.63663e-06	0.225438	TRUE
Asv053[Streptococcus (unc.)]	ACNE	Dry	rs60838429	A	T	1.13696	0.272784	0.0780258	FALSE	167926927	0.0226173	0.119651	8.83279e-06	0.24545	TRUE
Asv053[Streptococcus (unc.)]	ACNE	Dry	rs737269	T	C	0.759803	-0.274515	0.17537	FALSE	57047150	0.0477529	0.138675	3.68269e-06	0.15672	TRUE
Asv053[Streptococcus (unc.)]	ACNE	Dry	rs60838429	A	T	1.13696	0.0297719	0.0780491	FALSE	167926927	0.00285611	0.0278816	8.83279e-06	0.24545	TRUE
Asv053[Streptococcus (unc.)]	ACNE	Dry	rs737269	T	C	0.759803	0.0176108	0.175456	FALSE	57047150	0.00370101	0.0196487	3.68269e-06	0.15672	TRUE
Asv053[Streptococcus (unc.)]	ACNE	Dry	rs169074	T	A	0.638267	0.0159647	0.164148	FALSE	65874315	0.00429998	0.020229	2.5466e-06	0.129337	TRUE
Asv053[Streptococcus (unc.)]	ACNE	Dry	rs11619782	A	G	0.762383	0.00909694	0.219963	FALSE	43030022	0.00614362	0.0180546	2.0606e-06	0.152957	TRUE
Asv053[Streptococcus (unc.)]	ACNE	Dry	rs17032739	T	C	0.858281	-0.0052261	0.0735197	FALSE	106272925	0.00855507	0.0286996	9.07854e-06	0.185616	TRUE
Asv053[Streptococcus (unc.)]	ACNE	Dry	rs61025394	A	G	0.696151	0.00183038	0.26683	FALSE	7085584	0.00913877	0.0169246	8.14172e-06	0.149391	TRUE
Asv053[Streptococcus (unc.)]	ACNE	Dry	rs6893166	T	G	-1.07907	0.00110083	0.107481	FALSE	143897836	0.00963627	0.0241393	4.63663e-06	0.225438	TRUE
Asv053[Streptococcus (unc.)]	ACNE	Dry	rs17032739	T	C	0.858281	0.0420965	0.0734543	FALSE	106272925	0.00103748	0.0216526	9.07854e-06	0.185616	TRUE
Asv053[Streptococcus (unc.)]	ACNE	Dry	rs6893166	T	G	-1.07907	-0.0247689	0.107604	FALSE	143897836	0.00354514	0.0183575	4.63663e-06	0.225438	TRUE
Asv053[Streptococcus (unc.)]	ACNE	Dry	rs11619782	A	G	0.762383	-0.0165603	0.219108	FALSE	43030022	0.00453122	0.0136945	2.0606e-06	0.152957	TRUE
Asv053[Streptococcus (unc.)]	ACNE	Dry	rs60838429	A	T	1.13696	-0.0207054	0.0781328	FALSE	167926927	0.00651874	0.0210778	8.83279e-06	0.24545	TRUE
Asv053[Streptococcus (unc.)]	ACNE	Dry	rs737269	T	C	0.759803	0.0116417	0.175329	FALSE	57047150	0.00869046	0.0148971	3.68269e-06	0.15672	TRUE
Asv053[Streptococcus (unc.)]	ACNE	Dry	rs61025394	A	G	0.696151	-0.00882423	0.267553	FALSE	7085584	0.00983558	0.0128356	8.14172e-06	0.149391	TRUE
Asv053[Streptococcus (unc.)]	ACNE	Dry	rs169074	T	A	0.638267	-0.00786543	0.164203	FALSE	65874315	0.0121766	0.0153699	2.5466e-06	0.129337	TRUE
Asv053[Streptococcus (unc.)]	ACNE	Dry	rs11619782	A	G	0.762383	-0.0665917	0.219122	FALSE	43030022	0.000875972	0.0315913	2.0606e-06	0.152957	TRUE
Asv054[Enhydrobacter (unc.)]	ACNE	Moist	rs6893166	T	G	-1.07907	-0.0627777	0.107734	FALSE	143897836	0.00343425	0.0422558	4.63663e-06	0.225438	TRUE
Asv054[Enhydrobacter (unc.)]	ACNE	Moist	rs61025394	A	G	0.696151	-0.0247692	0.267638	FALSE	7085584	0.010096	0.0296716	8.14172e-06	0.149391	TRUE
Asv054[Enhydrobacter (unc.)]	ACNE	Moist	rs737269	T	C	0.759803	0.0249812	0.175346	FALSE	57047150	0.0117095	0.0344513	3.68269e-06	0.15672	TRUE
Asv054[Enhydrobacter (unc.)]	ACNE	Moist	rs169074	T	A	0.638267	0.0240867	0.164324	FALSE	65874315	0.0124328	0.0354881	2.5466e-06	0.129337	TRUE
Asv054[Enhydrobacter (unc.)]	ACNE	Moist	rs60838429	A	T	1.13696	0.0275135	0.0782119	FALSE	167926927	0.014313	0.0487532	8.83279e-06	0.24545	TRUE
Asv054[Enhydrobacter (unc.)]	ACNE	Moist	rs17032739	T	C	0.858281	0.0282747	0.0732742	FALSE	106272925	0.0143558	0.0503261	9.07854e-06	0.185616	TRUE
Asv054[Enhydrobacter (unc.)]	ACNE	Moist	rs169074	T	A	0.638267	-0.0841778	0.164173	FALSE	65874315	0.000530663	0.0349178	2.5466e-06	0.129337	TRUE
Asv054[Enhydrobacter (unc.)]	ACNE	Moist	rs60838429	A	T	1.13696	-0.0466542	0.078157	FALSE	167926927	0.011004	0.0479057	8.83279e-06	0.24545	TRUE
Asv054[Enhydrobacter (unc.)]	ACNE	Moist	rs737269	T	C	0.759803	0.0307578	0.175361	FALSE	57047150	0.0120504	0.0337076	3.68269e-06	0.15672	TRUE
Asv054[Enhydrobacter (unc.)]	ACNE	Moist	rs61025394	A	G	0.696151	-0.0111187	0.267638	FALSE	7085584	0.0234674	0.0292678	8.14172e-06	0.149391	TRUE
Asv054[Enhydrobacter (unc.)]	ACNE	Moist	rs11619782	A	G	0.762383	-0.00530531	0.219244	FALSE	43030022	0.0287857	0.0308751	2.0606e-06	0.152957	TRUE
Asv054[Enhydrobacter (unc.)]	ACNE	Moist	rs17032739	T	C	0.858281	0.00805469	0.073261	FALSE	106272925	0.0290184	0.0494277	9.07854e-06	0.185616	TRUE
Asv054[Enhydrobacter (unc.)]	ACNE	Moist	rs6893166	T	G	-1.07907	0.00487195	0.107789	FALSE	143897836	0.0302317	0.0416815	4.63663e-06	0.225438	TRUE
Asv054[Enhydrobacter (unc.)]	ACNE	Moist	rs73240078	C	G	-0.767577	0.149018	0.0391874	FALSE	43194604	0.0335939	0.070129	2.09419e-06	0.158004	TRUE
Asv054[Enhydrobacter (unc.)]	ACNE	Moist	rs968908	G	A	0.405345	-0.0259411	0.529551	FALSE	89712406	0.0237476	0.0114723	3.36134e-06	0.0852543	TRUE
Asv054[Enhydrobacter (unc.)]	ACNE	Moist	rs968908	G	A	0.405345	0.0661643	0.52954	FALSE	89712406	0.0486665	0.0335603	3.36134e-06	0.0852543	TRUE
Asv054[Enhydrobacter (unc.)]	ACNE	Moist	rs10915877	C	G	0.407651	0.218294	0.446161	FALSE	225802050	0.0268324	0.0985994	6.45992e-06	0.0884493	TRUE
Asv054[Enhydrobacter (unc.)]	ACNE	Moist	rs10915877	C	G	0.407651	-0.175509	0.446137	FALSE	225802050	0.0125311	0.0702929	6.45992e-06	0.0884493	TRUE
Asv054[Enhydrobacter (unc.)]	ACNE	Moist	rs968908	G	A	0.405345	0.0147242	0.529551	FALSE	89712406	0.0498138	0.00750637	3.36134e-06	0.0852543	TRUE
Asv054[Enhydrobacter (unc.)]	ACNE	Moist	rs137997174	G	A	-0.759656	-0.395521	0.059054	FALSE	57519610	0.00295379	0.13306	9.82945e-06	0.168312	TRUE
Asv054[Enhydrobacter (unc.)]	ACNE	Moist	rs10915877	C	G	0.407651	-0.187999	0.446254	FALSE	225802050	0.0232965	0.0828721	6.45992e-06	0.0884493	TRUE
Asv054[Enhydrobacter (unc.)]	ACNE	Moist	rs968908	G	A	0.405345	0.185882	0.529172	FALSE	89712406	0.0244118	0.0825929	3.36134e-06	0.0852543	TRUE
Asv054[Enhydrobacter (unc.)]	ACNE	Moist	rs73240078	C	G	-0.767577	-0.465764	0.0392567	FALSE	43194604	0.0296606	0.214184	2.09419e-06	0.158004	TRUE
Asv054[Enhydrobacter (unc.)]	ACNE	Moist	rs137997174	G	A	-0.759656	0.12316	0.0590371	FALSE	57519610	0.0439471	0.0611336	9.82945e-06	0.168312	TRUE
Asv054[Enhydrobacter (unc.)]	ACNE	Moist	rs137997174	G	A	-0.759656	-0.0435557	0.0589904	FALSE	57519610	0.00171221	0.0318322	9.82945e-06	0.168312	TRUE
Asv054[Enhydrobacter (unc.)]	ACNE	Moist	rs2274755	T	G	-0.619012	0.0273979	0.160156	FALSE	46011053	0.00180476	0.020457	3.66889e-06	0.130725	TRUE
Asv054[Enhydrobacter (unc.)]	ACNE	Moist	rs968908	G	A	0.405345	0.0183177	0.529523	FALSE	89712406	0.00222649	0.0150205	3.36134e-06	0.0852543	TRUE
Asv054[Enhydrobacter (unc.)]	ACNE	Moist	rs10915877	C	G	0.407651	-0.00488607	0.446086	FALSE	225802050	0.0074536	0.015045	6.45992e-06	0.0884493	TRUE
Asv054[Enhydrobacter (unc.)]	ACNE	Moist	rs7399129	A	G	0.409934	0.00332663	0.552253	FALSE	129612668	0.00825416	0.015081	1.79104e-06	0.0838008	TRUE
Asv054[Enhydrobacter (unc.)]	ACNE	Moist	rs73240078	C	G	-0.767577	-0.00586096	0.0391838	FALSE	43194604	0.00879425	0.0386355	2.09419e-06	0.158004	TRUE
Asv054[Enhydrobacter (unc.)]	ACNE	Moist	rs6982140	C	T	-0.821892	-0.00113817	0.0421313	FALSE	31141912	0.00975564	0.0371574	6.12236e-06	0.177862	TRUE
Asv054[Enhydrobacter (unc.)]	ACNE	Moist	rs6982140	C	T	-0.821892	-0.0304143	0.0419895	FALSE	31141912	0.00552598	0.0279371	6.12236e-06	0.177862	TRUE
Asv054[Enhydrobacter (unc.)]	ACNE	Moist	rs10915877	C	G	0.407651	0.0109996	0.446687	FALSE	225802050	0.00671276	0.0114244	6.45992e-06	0.0884493	TRUE
Asv054[Enhydrobacter (unc.)]	ACNE	Moist	rs2274755	T	G	-0.619012	-0.014025	0.16055	FALSE	46011053	0.00728842	0.0154635	3.66889e-06	0.130725	TRUE
Asv054[Enhydrobacter (unc.)]	ACNE	Moist	rs7399129	A	G	0.409934	0.00906481	0.552446	FALSE	129612668	0.0085496	0.0114237	1.79104e-06	0.0838008	TRUE
Asv054[Enhydrobacter (unc.)]	ACNE	Moist	rs968908	G	A	0.405345	0.00627415	0.529552	FALSE	89712406	0.0116326	0.0113867	3.36134e-06	0.0852543	TRUE
Asv054[Enhydrobacter (unc.)]	ACNE	Moist	rs137997174	G	A	-0.759656	-0.00799756	0.0591419	FALSE	57519610	0.0147935	0.0240685	9.82945e-06	0.168312	TRUE
Asv061[S. Mitis]	ACNE	Dry	rs73240078	C	G	-0.767577	-0.00825423	0.0391726	FALSE	43194604	0.0155428	0.029162	2.09419e-06	0.158004	TRUE
Asv061[S. Mitis]	ACNE	Dry	rs137997174	G	A	-0.759656	0.0663088	0.059219	FALSE	57519610	0.0058098	0.0555248	9.82945e-06	0.168312	TRUE
Asv061[S. Mitis]	ACNE	Dry	rs73240078	C	G	-0.767577	0.024867	0.0391944	FALSE	43194604	0.0177569	0.06694	2.09419e-06	0.158004	TRUE
Asv061[S. Mitis]	ACNE	Dry	rs968908	G	A	0.405345	0.00772806	0.529507	FALSE	89712406	0.0192301	0.0263381	3.36134e-06	0.0852543	TRUE
Asv061[S. Mitis]	ACNE	Dry	rs2274755	T	G	-0.619012	0.00164451	0.160674	FALSE	46011053	0.0240861	0.0358814	3.66889e-06	0.130725	TRUE
Asv061[S. Mitis]	ACNE	Dry	rs6982140	C	T	-0.821892	-0.00231675	0.041982	FALSE	31141912	0.0242818	0.0643295	6.12236e-06	0.177862	TRUE
Asv061[S. Mitis]	ACNE	Dry	rs10915877	C	G	0.407651	0.000606287	0.446517	FALSE	225802050	0.0245432	0.0264758	6.45992e-06	0.0884493	TRUE
Asv061[S. Mitis]	ACNE	Dry	rs7399129	A	G	0.409934	0.00051679	0.552306	FALSE	129612668	0.0246101	0.0264395	1.79104e-06	0.0838008	TRUE
Asv061[S. Mitis]	ACNE	Dry	rs968908	G	A	0.405345	-0.0387211	0.529392	FALSE	89712406	0.00444733	0.0258012	3.36134e-06	0.0852543	TRUE
Asv061[S. Mitis]	ACNE	Dry	rs2274755	T	G	-0.619012	-0.0491491	0.160595	FALSE	46011053	0.00543547	0.0352364	3.66889e-06	0.130725	TRUE
Asv061[S. Mitis]	ACNE	Dry	rs137997174	G	A	-0.759656	0.0554997	0.0592077	FALSE	57519610	0.0103705	0.0547937	9.82945e-06	0.168312	TRUE
Asv061[S. Mitis]	ACNE	Dry	rs6982140	C	T	-0.821892	0.0418279	0.0420138	FALSE	31141912	0.0167889	0.0625481	6.12236e-06	0.177862	TRUE
Asv061[S. Mitis]	ACNE	Dry	rs73240078	C	G	-0.767577	0.0296676	0.039194	FALSE	43194604	0.0217412	0.0658317	2.09419e-06	0.158004	TRUE
Asv061[S. Mitis]	ACNE	Dry	rs10915877	C	G	0.407651	0.00845803	0.446559	FALSE	225802050	0.0248293	0.0259927	6.45992e-06	0.0884493	TRUE
Asv061[S. Mitis]	ACNE	Dry	rs7399129	A	G	0.409934	0.0075381	0.552312	FALSE	129612668	0.0256996	0.0258969	1.79104e-06	0.0838008	TRUE
Asv061[S. Mitis]	ACNE	Dry	rs2253206	G	A	0.437	-0.0601253	0.492047	FALSE	207527254	0.0273785	0.0272544	3.03204e-07	0.0830756	TRUE
Asv061[S. Mitis]	ACNE	Dry	rs2253206	G	A	0.437	0.218956	0.491959	FALSE	207527254	0.0316097	0.101873	3.03204e-07	0.0830756	TRUE
Asv061[S. Mitis]	ACNE	Dry	rs2253206	G	A	0.437	-0.0245064	0.49187	FALSE	207527254	0.0319808	0.0114268	3.03204e-07	0.0830756	TRUE
Asv061[S. Mitis]	ACNE	Dry	rs2971578	C	T	0.628473	0.0989723	0.141059	FALSE	102350711	0.00994352	0.0383943	5.23947e-06	0.135064	TRUE
Asv061[S. Mitis]	ACNE	Dry	rs60837155	T	C	-0.88295	0.122593	0.0542232	FALSE	55040398	0.0415853	0.0601643	1.15876e-06	0.177242	TRUE
Asv061[S. Mitis]	ACNE	Dry	rs28756042	T	C	-0.725183	-0.133877	0.0900301	FALSE	30709695	0.00709169	0.0497219	7.29404e-06	0.158381	TRUE
Asv061[S. Mitis]	ACNE	Dry	rs150789784	A	C	-0.67764	0.0608067	0.111558	FALSE	129211071	0.0479248	0.030741	5.44279e-06	0.145898	TRUE
Asv061[S. Mitis]	ACNE	Dry	rs2971578	C	T	0.628473	-0.0810505	0.141163	FALSE	102350711	0.0034712	0.0277323	5.23947e-06	0.135064	TRUE
Asv061[S. Mitis]	ACNE	Dry	rs11826119	T	C	0.428856	0.0489326	0.322803	FALSE	42635131	0.0152721	0.0201712	5.59223e-06	0.0924547	TRUE
Asv061[S. Mitis]	ACNE	Dry	rs10811826	T	G	0.443014	0.0303472	0.654926	FALSE	23072635	0.0234148	0.0133889	1.35914e-06	0.0895398	TRUE
Asv061[S. Mitis]	ACNE	Dry	rs150789784	A	C	-0.67764	-0.0280932	0.111559	FALSE	129211071	0.0179775	0.0118733	5.44279e-06	0.145898	TRUE
Asv061[S. Mitis]	ACNE	Dry	rs10811826	T	G	0.443014	0.153111	0.65477	FALSE	23072635	0.0417869	0.0752153	1.35914e-06	0.0895398	TRUE
Asv061[S. Mitis]	ACNE	Dry	rs150789784	A	C	-0.67764	-0.0935306	0.111514	FALSE	129211071	0.0421813	0.046035	5.44279e-06	0.145898	TRUE
Asv061[S. Mitis]	ACNE	Dry	rs2253206	G	A	0.437	0.057505	0.491667	FALSE	207527254	0.0467649	0.0289198	3.03204e-07	0.0830756	TRUE
Asv061[S. Mitis]	ACNE	Dry	rs11826119	T	C	0.428856	0.17698	0.322739	FALSE	42635131	0.00725989	0.0659223	5.59223e-06	0.0924547	TRUE
Asv061[S. Mitis]	ACNE	Dry	rs28756042	T	C	-0.725183	0.470597	0.0900465	FALSE	30709695	0.00191205	0.151631	7.29404e-06	0.158381	TRUE
Asv061[S. Mitis]	ACNE	Dry	rs150789784	A	C	-0.67764	-0.400449	0.11166	FALSE	129211071	0.0171664	0.168035	5.44279e-06	0.145898	TRUE
Asv061[S. Mitis]	ACNE	Dry	rs499303	T	G	0.463633	-0.252308	0.401724	FALSE	10115558	0.0251322	0.11267	5.77904e-06	0.100111	TRUE
Asv061[S. Mitis]	ACNE	Dry	rs150789784	A	C	-0.67764	-0.0368006	0.111596	FALSE	129211071	0.00121098	0.0237396	5.44279e-06	0.145898	TRUE
Asv061[S. Mitis]	ACNE	Dry	rs10811826	T	G	0.443014	0.0244783	0.654927	FALSE	23072635	0.00122661	0.0158569	1.35914e-06	0.0895398	TRUE
Asv061[S. Mitis]	ACNE	Dry	rs2971578	C	T	0.628473	0.0230716	0.14116	FALSE	102350711	0.00284825	0.0215715	5.23947e-06	0.135064	TRUE
Asv061[S. Mitis]	ACNE	Dry	rs9656030	C	T	-0.552797	0.0184698	0.206173	FALSE	95570175	0.00319388	0.0185492	7.67932e-06	0.12104	TRUE
Asv070[Veillonella (unc.)]	ACNE	Dry	rs60837155	T	C	-0.88295	-0.0212428	0.0541709	FALSE	55040398	0.00521111	0.0331072	1.15876e-06	0.177242	TRUE
Asv070[Veillonella (unc.)]	ACNE	Dry	rs297799	T	C	0.512912	-0.0128605	0.14818	FALSE	34209578	0.00540873	0.0210314	9.95114e-07	0.102299	TRUE
Asv070[Veillonella (unc.)]	ACNE	Dry	rs9518026	A	G	-0.539839	0.0113511	0.157268	FALSE	87654308	0.00582566	0.0206518	4.52257e-06	0.115204	TRUE
Asv070[Veillonella (unc.)]	ACNE	Dry	rs28756042	T	C	-0.725183	0.00999752	0.0900408	FALSE	30709695	0.00703142	0.0262346	7.29404e-06	0.158381	TRUE
Asv070[Veillonella (unc.)]	ACNE	Dry	rs2253206	G	A	0.437	0.00309336	0.491909	FALSE	207527254	0.00836131	0.0149549	3.03204e-07	0.0830756	TRUE
Asv070[Veillonella (unc.)]	ACNE	Dry	rs499303	T	G	0.463633	0.00197013	0.401736	FALSE	10115558	0.0090285	0.0161404	5.77904e-06	0.100111	TRUE
Asv070[Veillonella (unc.)]	ACNE	Dry	rs11826119	T	C	0.428856	0.0012598	0.322658	FALSE	42635131	0.00937437	0.0160501	5.59223e-06	0.0924547	TRUE
Asv070[Veillonella (unc.)]	ACNE	Dry	rs10811826	T	G	0.443014	0.0269537	0.65407	FALSE	23072635	0.000493196	0.0119971	1.35914e-06	0.0895398	TRUE
Asv070[Veillonella (unc.)]	ACNE	Dry	rs9518026	A	G	-0.539839	-0.0300763	0.157172	FALSE	87654308	0.00108315	0.0156194	4.52257e-06	0.115204	TRUE
Asv070[Veillonella (unc.)]	ACNE	Dry	rs2253206	G	A	0.437	-0.015787	0.492469	FALSE	207527254	0.0032676	0.0113266	3.03204e-07	0.0830756	TRUE
Asv070[Veillonella (unc.)]	ACNE	Dry	rs150789784	A	C	-0.67764	-0.0219264	0.111264	FALSE	129211071	0.00448458	0.0180411	5.44279e-06	0.145898	TRUE
Asv070[Veillonella (unc.)]	ACNE	Dry	rs11826119	T	C	0.428856	0.013913	0.323349	FALSE	42635131	0.00505144	0.0121604	5.59223e-06	0.0924547	TRUE
Asv070[Veillonella (unc.)]	ACNE	Dry	rs297799	T	C	0.512912	-0.0170739	0.148026	FALSE	34209578	0.00567682	0.0159312	9.95114e-07	0.102299	TRUE
Asv070[Veillonella (unc.)]	ACNE	Dry	rs9656030	C	T	-0.552797	-0.00818339	0.206676	FALSE	95570175	0.0112116	0.0140614	7.67932e-06	0.12104	TRUE
Asv070[Veillonella (unc.)]	ACNE	Dry	rs2971578	C	T	0.628473	-0.0063446	0.141162	FALSE	102350711	0.0139586	0.0163472	5.23947e-06	0.135064	TRUE
Asv070[Veillonella (unc.)]	ACNE	Dry	rs28756042	T	C	-0.725183	-0.00480113	0.0900347	FALSE	30709695	0.0161789	0.0198569	7.29404e-06	0.158381	TRUE
Asv070[Veillonella (unc.)]	ACNE	Dry	rs60837155	T	C	-0.88295	0.00420156	0.0541562	FALSE	55040398	0.0173498	0.0251822	1.15876e-06	0.177242	TRUE
Asv070[Veillonella (unc.)]	ACNE	Dry	rs499303	T	G	0.463633	-0.000770539	0.402092	FALSE	10115558	0.0189971	0.0122527	5.77904e-06	0.100111	TRUE
Asv070[Veillonella (unc.)]	ACNE	Dry	rs2971578	C	T	0.628473	-0.103634	0.141095	FALSE	102350711	0.00017576	0.0384484	5.23947e-06	0.135064	TRUE
Asv070[Veillonella (unc.)]	ACNE	Dry	rs150789784	A	C	-0.67764	-0.0417025	0.111327	FALSE	129211071	0.00793205	0.0417001	5.44279e-06	0.145898	TRUE
Asv070[Veillonella (unc.)]	ACNE	Dry	rs2253206	G	A	0.437	-0.0255087	0.49256	FALSE	207527254	0.00824458	0.0261748	3.03204e-07	0.0830756	TRUE
Asv070[Veillonella (unc.)]	ACNE	Dry	rs11826119	T	C	0.428856	-0.0194409	0.323305	FALSE	42635131	0.0122532	0.028171	5.59223e-06	0.0924547	TRUE
Asv070[Veillonella (unc.)]	ACNE	Dry	rs28756042	T	C	-0.725183	0.0280806	0.0900559	FALSE	30709695	0.0135185	0.0459066	7.29404e-06	0.158381	TRUE
Asv070[Veillonella (unc.)]	ACNE	Dry	rs10811826	T	G	0.443014	-0.0132183	0.653671	FALSE	23072635	0.0158758	0.027848	1.35914e-06	0.0895398	TRUE
Asv070[Veillonella (unc.)]	ACNE	Dry	rs297799	T	C	0.512912	-0.0110552	0.148122	FALSE	34209578	0.0191001	0.036823	9.95114e-07	0.102299	TRUE
Asv070[Veillonella (unc.)]	ACNE	Dry	rs60837155	T	C	-0.88295	0.0113353	0.0541825	FALSE	55040398	0.0211202	0.0579077	1.15876e-06	0.177242	TRUE
Asv070[Veillonella (unc.)]	ACNE	Dry	rs499303	T	G	0.463633	-0.00413908	0.402136	FALSE	10115558	0.0221017	0.0283859	5.77904e-06	0.100111	TRUE
Asv070[Veillonella (unc.)]	ACNE	Dry	rs9518026	A	G	-0.539839	0.00448902	0.157362	FALSE	87654308	0.0225139	0.0359239	4.52257e-06	0.115204	TRUE
Asv070[Veillonella (unc.)]	ACNE	Dry	rs9656030	C	T	-0.552797	0.00191416	0.206834	FALSE	95570175	0.0238259	0.0325016	7.67932e-06	0.12104	TRUE
Asv070[Veillonella (unc.)]	ACNE	Dry	rs60837155	T	C	-0.88295	0.139695	0.0542452	FALSE	55040398	0.000481313	0.0571085	1.15876e-06	0.177242	TRUE
Asv070[Veillonella (unc.)]	ACNE	Dry	rs150789784	A	C	-0.67764	-0.0863117	0.111285	FALSE	129211071	0.00114688	0.0408041	5.44279e-06	0.145898	TRUE
Asv070[Veillonella (unc.)]	ACNE	Dry	rs2971578	C	T	0.628473	0.041435	0.141252	FALSE	102350711	0.0088754	0.0372714	5.23947e-06	0.135064	TRUE
Asv070[Veillonella (unc.)]	ACNE	Dry	rs9518026	A	G	-0.539839	0.0382624	0.157411	FALSE	87654308	0.00927407	0.035287	4.52257e-06	0.115204	TRUE
Asv070[Veillonella (unc.)]	ACNE	Dry	rs2253206	G	A	0.437	-0.0198846	0.492594	FALSE	207527254	0.0146179	0.0256686	3.03204e-07	0.0830756	TRUE
Asv070[Veillonella (unc.)]	ACNE	Dry	rs9656030	C	T	-0.552797	0.020766	0.206853	FALSE	95570175	0.0172226	0.0320229	7.67932e-06	0.12104	TRUE
Asv070[Veillonella (unc.)]	ACNE	Dry	rs499303	T	G	0.463633	-0.0130069	0.4021	FALSE	10115558	0.0213826	0.0279337	5.77904e-06	0.100111	TRUE
Asv070[Veillonella (unc.)]	ACNE	Dry	rs28756042	T	C	-0.725183	0.0176791	0.0900467	FALSE	30709695	0.0231467	0.0449975	7.29404e-06	0.158381	TRUE
Asv100[F. Magna]	ACNE	Dry	rs10811826	T	G	0.443014	0.00615994	0.653702	FALSE	23072635	0.0273791	0.0272832	1.35914e-06	0.0895398	TRUE
Asv100[F. Magna]	ACNE	Dry	rs11826119	T	C	0.428856	-0.00236493	0.323332	FALSE	42635131	0.0310576	0.0276049	5.59223e-06	0.0924547	TRUE
Asv100[F. Magna]	ACNE	Dry	rs297799	T	C	0.512912	-0.00175939	0.148136	FALSE	34209578	0.0320395	0.0361507	9.95114e-07	0.102299	TRUE
Asv100[F. Magna]	ACNE	Dry	rs12137030	C	T	0.494524	0.0695542	0.288356	FALSE	56745446	0.000689397	0.0300613	9.72e-06	0.108487	TRUE
Asv100[F. Magna]	ACNE	Dry	rs61938866	C	T	0.611749	-0.07348	0.21682	FALSE	78522168	0.00087345	0.0330517	7.48e-06	0.132422	TRUE
Asv100[F. Magna]	ACNE	Dry	rs12706600	C	A	0.823751	0.080931	0.132323	FALSE	124426141	0.00142439	0.0399398	5.59e-06	0.17574	TRUE
Asv100[F. Magna]	ACNE	Dry	rs1337274	T	C	-0.837951	-0.0898121	0.92361	FALSE	85747076	0.00277389	0.0518449	5.15e-06	0.178063	TRUE
Asv100[F. Magna]	ACNE	Dry	rs17614396	G	A	0.651501	-0.0348361	0.190229	FALSE	100887394	0.0104577	0.0345794	3.07e-06	0.135052	TRUE
Asv100[F. Magna]	ACNE	Dry	rs254837	C	G	-0.859313	0.033644	0.924976	FALSE	159256192	0.0172471	0.0519728	8.82e-06	0.187574	TRUE
Asv100[F. Magna]	ACNE	Dry	rs11125679	T	C	-0.472962	0.0132965	0.623764	FALSE	56998775	0.0211922	0.0280738	3.92e-06	0.0991784	TRUE
Asv100[F. Magna]	ACNE	Dry	rs1992183	C	T	0.536596	-0.00471187	0.694129	FALSE	182439027	0.0291157	0.0295874	2.56e-06	0.110286	TRUE
Asv100[F. Magna]	ACNE	Dry	rs79278812	A	C	0.897314	0.00610131	0.0717993	FALSE	109646446	0.0302707	0.0528661	3.26e-06	0.186542	TRUE
Asv100[F. Magna]	ACNE	Dry	rs12137030	C	T	0.494524	-0.232061	0.28836	FALSE	56745446	0.00159764	0.112961	9.71612e-06	0.108487	TRUE
Asv100[F. Magna]	ACNE	Dry	rs1337274	T	C	-0.837951	0.21439	0.924244	FALSE	85747076	0.0110268	0.19667	5.15435e-06	0.178063	TRUE
Asv100[F. Magna]	ACNE	Dry	rs61938866	C	T	0.611749	-0.1217	0.217511	FALSE	78522168	0.01304	0.123905	7.47846e-06	0.132422	TRUE
Asv100[F. Magna]	ACNE	Dry	rs254837	C	G	-0.859313	0.145755	0.924906	FALSE	159256192	0.0180892	0.193899	8.81595e-06	0.187574	TRUE
Asv100[F. Magna]	ACNE	Dry	rs11125679	T	C	-0.472962	0.0401218	0.624365	FALSE	56998775	0.0281001	0.105046	3.91705e-06	0.0991784	TRUE
Asv100[F. Magna]	ACNE	Dry	rs79278812	A	C	0.897314	0.0750062	0.0714285	FALSE	109646446	0.0281334	0.196958	3.26429e-06	0.186542	TRUE
Asv100[F. Magna]	ACNE	Dry	rs1992183	C	T	0.536596	-0.0236793	0.694109	FALSE	182439027	0.0331815	0.109985	2.55575e-06	0.110286	TRUE
Asv100[F. Magna]	ACNE	Dry	rs12706600	C	A	0.823751	-0.0298702	0.132004	FALSE	124426141	0.0336421	0.148943	5.58727e-06	0.17574	TRUE
Asv100[F. Magna]	ACNE	Dry	rs17614396	G	A	0.651501	-0.00157977	0.189883	FALSE	100887394	0.0396068	0.128236	3.07112e-06	0.135052	TRUE
Asv100[F. Magna]	ACNE	Dry	rs6951622	G	C	0.55053	0.0253382	0.323299	FALSE	148429882	0.0381777	0.0122233	5.06879e-06	0.116732	TRUE
Asv100[F. Magna]	ACNE	Dry	rs112990712	C	T	0.816386	-0.106321	0.111267	FALSE	163089055	0.0266036	0.0479509	4.32578e-06	0.171774	TRUE
Asv100[F. Magna]	ACNE	Dry	rs34885890	A	G	0.974744	0.0629571	0.0897097	FALSE	2387668	0.0183709	0.0266987	8.92166e-07	0.190885	TRUE
Asv100[F. Magna]	ACNE	Dry	rs6951622	G	C	0.55053	0.0457512	0.323166	FALSE	148429882	0.0269904	0.0206864	5.06879e-06	0.116732	TRUE
Asv100[F. Magna]	ACNE	Dry	rs4492732	G	A	1.08325	-0.351755	0.0601219	FALSE	120613346	0.0164498	0.146639	3.7001e-06	0.226221	TRUE
Asv100[F. Magna]	ACNE	Dry	rs4492732	G	A	1.08325	0.057444	0.0600646	FALSE	120613346	0.0306655	0.0265774	3.7001e-06	0.226221	TRUE
Asv100[F. Magna]	ACNE	Dry	rs4492732	G	A	1.08325	0.0320206	0.060093	FALSE	120613346	0.042061	0.0157511	3.7001e-06	0.226221	TRUE
Asv100[F. Magna]	ACNE	Dry	rs6951622	G	C	0.55053	0.169546	0.323231	FALSE	148429882	0.0263196	0.0763219	5.06879e-06	0.116732	TRUE
Asv100[F. Magna]	ACNE	Dry	rs55702239	A	G	0.599683	-0.17649	0.262583	FALSE	54191582	0.0187556	0.0750908	3.53155e-08	0.103672	TRUE
Asv100[F. Magna]	ACNE	Dry	rs6951622	G	C	0.55053	0.176996	0.323549	FALSE	148429882	0.00270296	0.0590057	5.06879e-06	0.116732	TRUE
Asv100[F. Magna]	ACNE	Dry	rs6951622	G	C	0.55053	-0.0561424	0.323417	FALSE	148429882	0.027808	0.0255195	5.06879e-06	0.116732	TRUE
Asv100[F. Magna]	ACNE	Dry	rs55702239	A	G	0.599683	-0.0548231	0.262671	FALSE	54191582	0.0429428	0.0270829	3.53155e-08	0.103672	TRUE
Asv100[F. Magna]	ACNE	Dry	rs6951622	G	C	0.55053	-0.0282561	0.323299	FALSE	148429882	0.0363865	0.013503	5.06879e-06	0.116732	TRUE
Asv100[F. Magna]	ACNE	Dry	rs10846578	T	C	-0.522194	-0.0244293	0.346193	FALSE	123915731	0.00121831	0.0157901	6.23645e-06	0.111864	TRUE
Asv100[F. Magna]	ACNE	Dry	rs34885890	A	G	0.974744	-0.0384684	0.0896592	FALSE	2387668	0.00140365	0.0260903	8.92166e-07	0.190885	TRUE
Asv100[F. Magna]	ACNE	Dry	rs6951622	G	C	0.55053	-0.0219435	0.323376	FALSE	148429882	0.00171157	0.0160347	5.06879e-06	0.116732	TRUE
Asv122[Staphylococcus (unc.)]	ACNE	Sebaceous	rs4492732	G	A	1.08325	0.0315472	0.060106	FALSE	120613346	0.00315817	0.03145	3.7001e-06	0.226221	TRUE
Asv122[Staphylococcus (unc.)]	ACNE	Sebaceous	rs55702239	A	G	0.599683	-0.0137468	0.262681	FALSE	54191582	0.00419539	0.0170298	3.53155e-08	0.103672	TRUE
Asv122[Staphylococcus (unc.)]	ACNE	Sebaceous	rs1891661	A	G	0.541614	0.0117544	0.63006	FALSE	210812668	0.00448118	0.0154957	1.97543e-06	0.10985	TRUE
Asv122[Staphylococcus (unc.)]	ACNE	Sebaceous	rs112990712	C	T	0.816386	-0.0140679	0.111361	FALSE	163089055	0.00553027	0.0237141	4.32578e-06	0.171774	TRUE
Asv122[Staphylococcus (unc.)]	ACNE	Sebaceous	rs73231219	C	T	-0.735643	-0.00414055	0.0570762	FALSE	140470530	0.00897578	0.0321666	1.47038e-07	0.133959	TRUE
Asv122[Staphylococcus (unc.)]	ACNE	Sebaceous	rs567637	A	G	-0.50942	-0.00103641	0.570907	FALSE	84500760	0.00945744	0.0152297	4.81074e-06	0.10774	TRUE
Asv122[Staphylococcus (unc.)]	ACNE	Sebaceous	rs6951622	G	C	0.55053	0.0202984	0.324589	FALSE	148429882	0.00189339	0.0121456	5.06879e-06	0.116732	TRUE
Asv122[Staphylococcus (unc.)]	ACNE	Sebaceous	rs1891661	A	G	0.541614	0.0181318	0.628829	FALSE	210812668	0.0024419	0.0117279	1.97543e-06	0.10985	TRUE
Asv122[Staphylococcus (unc.)]	ACNE	Sebaceous	rs10846578	T	C	-0.522194	-0.0119712	0.345625	FALSE	123915731	0.00635562	0.0119828	6.23645e-06	0.111864	TRUE
Asv122[Staphylococcus (unc.)]	ACNE	Sebaceous	rs73231219	C	T	-0.735643	0.022103	0.0568783	FALSE	140470530	0.0073101	0.0244252	1.47038e-07	0.133959	TRUE
Asv122[Staphylococcus (unc.)]	ACNE	Sebaceous	rs34885890	A	G	0.974744	-0.0173323	0.0896279	FALSE	2387668	0.00766184	0.0198717	8.92166e-07	0.190885	TRUE
Asv122[Staphylococcus (unc.)]	ACNE	Sebaceous	rs4492732	G	A	1.08325	-0.0150656	0.0599906	FALSE	120613346	0.0105801	0.0239316	3.7001e-06	0.226221	TRUE
Asv122[Staphylococcus (unc.)]	ACNE	Sebaceous	rs567637	A	G	-0.50942	-0.00524058	0.570654	FALSE	84500760	0.012988	0.011528	4.81074e-06	0.10774	TRUE
Asv122[Staphylococcus (unc.)]	ACNE	Sebaceous	rs55702239	A	G	0.599683	-0.00524639	0.262728	FALSE	54191582	0.0136823	0.012895	3.53155e-08	0.103672	TRUE
Asv122[Staphylococcus (unc.)]	ACNE	Sebaceous	rs112990712	C	T	0.816386	-0.00240799	0.11115	FALSE	163089055	0.0178727	0.0180092	4.32578e-06	0.171774	TRUE
Asv122[Staphylococcus (unc.)]	ACNE	Sebaceous	rs1891661	A	G	0.541614	0.0502963	0.628563	FALSE	210812668	0.00160037	0.0271567	1.97543e-06	0.10985	TRUE
Asv122[Staphylococcus (unc.)]	ACNE	Sebaceous	rs73231219	C	T	-0.735643	-0.0946626	0.056756	FALSE	140470530	0.00232488	0.0563531	1.47038e-07	0.133959	TRUE
Asv122[Staphylococcus (unc.)]	ACNE	Sebaceous	rs34885890	A	G	0.974744	0.0406839	0.0897603	FALSE	2387668	0.00934715	0.0457525	8.92166e-07	0.190885	TRUE
Asv122[Staphylococcus (unc.)]	ACNE	Sebaceous	rs4492732	G	A	1.08325	-0.0462062	0.060042	FALSE	120613346	0.0100328	0.0550548	3.7001e-06	0.226221	TRUE
Asv122[Staphylococcus (unc.)]	ACNE	Sebaceous	rs567637	A	G	-0.50942	-0.0208931	0.570587	FALSE	84500760	0.0108355	0.0266715	4.81074e-06	0.10774	TRUE
Asv122[Staphylococcus (unc.)]	ACNE	Sebaceous	rs10846578	T	C	-0.522194	-0.0140133	0.345711	FALSE	123915731	0.0153135	0.0276694	6.23645e-06	0.111864	TRUE
Asv122[Staphylococcus (unc.)]	ACNE	Sebaceous	rs112990712	C	T	0.816386	0.0184401	0.1112	FALSE	163089055	0.0164303	0.0415536	4.32578e-06	0.171774	TRUE
Asv122[Staphylococcus (unc.)]	ACNE	Sebaceous	rs6951622	G	C	0.55053	-0.0117316	0.324367	FALSE	148429882	0.0169275	0.0281725	5.06879e-06	0.116732	TRUE
Asv122[Staphylococcus (unc.)]	ACNE	Sebaceous	rs55702239	A	G	0.599683	-0.00728025	0.262793	FALSE	54191582	0.0201766	0.0298109	3.53155e-08	0.103672	TRUE
Asv122[Staphylococcus (unc.)]	ACNE	Sebaceous	rs34885890	A	G	0.974744	-0.138889	0.0896138	FALSE	2387668	9.13753e-05	0.0463683	8.92166e-07	0.190885	TRUE
Asv122[Staphylococcus (unc.)]	ACNE	Sebaceous	rs112990712	C	T	0.816386	-0.0456149	0.111123	FALSE	163089055	0.00886877	0.0410141	4.32578e-06	0.171774	TRUE
Asv122[Staphylococcus (unc.)]	ACNE	Sebaceous	rs10846578	T	C	-0.522194	-0.0272129	0.345671	FALSE	123915731	0.0105409	0.027152	6.23645e-06	0.111864	TRUE
Asv122[Staphylococcus (unc.)]	ACNE	Sebaceous	rs1891661	A	G	0.541614	0.0243862	0.628497	FALSE	210812668	0.0119781	0.0266045	1.97543e-06	0.10985	TRUE
Asv122[Staphylococcus (unc.)]	ACNE	Sebaceous	rs4492732	G	A	1.08325	-0.0463533	0.0600365	FALSE	120613346	0.013093	0.0542419	3.7001e-06	0.226221	TRUE
Asv122[Staphylococcus (unc.)]	ACNE	Sebaceous	rs55702239	A	G	0.599683	0.024699	0.262852	FALSE	54191582	0.0133335	0.0293473	3.53155e-08	0.103672	TRUE
Asv122[Staphylococcus (unc.)]	ACNE	Sebaceous	rs73231219	C	T	-0.735643	-0.0273118	0.056792	FALSE	140470530	0.0207088	0.0552806	1.47038e-07	0.133959	TRUE
Asv122[Staphylococcus (unc.)]	ACNE	Sebaceous	rs6951622	G	C	0.55053	-0.0113418	0.324367	FALSE	148429882	0.02271	0.0276166	5.06879e-06	0.116732	TRUE
Asv122[Staphylococcus (unc.)]	ACNE	Sebaceous	rs567637	A	G	-0.50942	-0.00111492	0.570645	FALSE	84500760	0.0321999	0.0261534	4.81074e-06	0.10774	TRUE
Asv122[Staphylococcus (unc.)]	ACNE	Sebaceous	rs12117331	G	A	0.540887	-0.0479803	0.205185	FALSE	24470348	0.00516063	0.0337245	2.39e-06	0.112032	TRUE
Asv122[Staphylococcus (unc.)]	ACNE	Sebaceous	rs1396075	A	T	-0.485796	0.028096	0.315797	FALSE	17142133	0.0112131	0.0292266	7.61e-06	0.106277	TRUE
Asv122[Staphylococcus (unc.)]	ACNE	Sebaceous	rs12887704	C	T	0.870503	-0.0374642	0.0786639	FALSE	22043012	0.0154017	0.0509389	8.92e-06	0.19196	TRUE
Asv122[Staphylococcus (unc.)]	ACNE	Sebaceous	rs13271408	A	G	0.41735	0.0144942	0.496898	FALSE	61033568	0.0200116	0.0276657	7.21e-06	0.0910577	TRUE
Family Clostridiales	ACNE	Moist	rs72876480	T	C	-0.751779	0.0229084	0.0856332	FALSE	62725188	0.0212298	0.0485301	3.42e-06	0.15828	TRUE
Family Clostridiales	ACNE	Moist	rs1990463	T	C	0.449804	0.00663292	0.395082	FALSE	71545083	0.0270696	0.0279006	1.09e-06	0.0900276	TRUE
Family Clostridiales	ACNE	Moist	rs4237695	G	C	-0.425136	0.00648794	0.633344	FALSE	13028216	0.0272601	0.0281631	4.92e-06	0.0910558	TRUE
Family Clostridiales	ACNE	Moist	rs2738140	G	C	0.459597	0.00129804	0.247241	FALSE	6903515	0.0322412	0.0316016	2.76e-06	0.0958163	TRUE
Family Clostridiales	ACNE	Moist	rs12887704	C	T	0.870503	0.428893	0.0785135	FALSE	22043012	0.000323534	0.161947	8.92137e-06	0.19196	TRUE
Family Clostridiales	ACNE	Moist	rs2738140	G	C	0.459597	0.125521	0.247626	FALSE	6903515	0.011514	0.118098	2.76369e-06	0.0958163	TRUE
Family Clostridiales	ACNE	Moist	rs1990463	T	C	0.449804	-0.0743378	0.395397	FALSE	71545083	0.0190816	0.104544	1.09366e-06	0.0900276	TRUE
Family Clostridiales	ACNE	Moist	rs12117331	G	A	0.540887	0.0876708	0.205436	FALSE	24470348	0.0194888	0.126193	2.39423e-06	0.112032	TRUE
Family Clostridiales	ACNE	Moist	rs13271408	A	G	0.41735	-0.0531367	0.49566	FALSE	61033568	0.0242278	0.102932	7.20651e-06	0.0910577	TRUE
Family Clostridiales	ACNE	Moist	rs4237695	G	C	-0.425136	-0.0504993	0.632496	FALSE	13028216	0.0252845	0.10548	4.92499e-06	0.0910558	TRUE
Family Clostridiales	ACNE	Moist	rs1396075	A	T	-0.485796	0.0465061	0.317272	FALSE	17142133	0.026815	0.109263	7.60833e-06	0.106277	TRUE
Family Clostridiales	ACNE	Moist	rs72876480	T	C	-0.751779	0.0584147	0.0854812	FALSE	62725188	0.0299213	0.181844	3.42264e-06	0.15828	TRUE
Family Clostridiales	ACNE	Moist	rs11228821	G	T	0.821625	-0.0664947	0.153095	FALSE	56858541	0.00251356	0.0373989	1.53e-06	0.164288	TRUE
Family Clostridiales	ACNE	Moist	rs72739986	A	G	0.874068	-0.0776407	0.108314	FALSE	85067767	0.00260129	0.0440596	7.13e-06	0.188064	TRUE
Family Clostridiales	ACNE	Moist	rs6001762	T	C	0.718128	0.055806	0.187795	FALSE	40099469	0.0035539	0.0345851	2.32e-06	0.14634	TRUE
Family Clostridiales	ACNE	Moist	rs12999310	T	C	0.76061	0.0628368	0.0769148	FALSE	47672592	0.0073835	0.0513987	2.82e-06	0.156428	TRUE
Family Clostridiales	ACNE	Moist	rs218076	T	A	0.482166	0.0231304	0.53206	FALSE	15042737	0.0132238	0.0272924	2.87e-06	0.0992425	TRUE
Family Clostridiales	ACNE	Moist	rs8044738	G	A	-0.493917	-0.0235974	0.647079	FALSE	15687197	0.0135546	0.0284366	7.13e-06	0.106269	TRUE
Family Clostridiales	ACNE	Moist	rs6821234	T	C	-0.584972	0.0218402	0.677279	FALSE	69573554	0.0150731	0.0290519	1.23e-06	0.115862	TRUE
Family Clostridiales	ACNE	Moist	rs6708653	T	C	0.60435	-0.00823453	0.171966	FALSE	147613960	0.0273594	0.0363491	6.67e-06	0.129598	TRUE
Family Clostridiales	ACNE	Moist	rs6708653	T	C	0.60435	0.303038	0.171747	FALSE	147613960	0.000994856	0.13508	6.67186e-06	0.129598	TRUE
Family Clostridiales	ACNE	Moist	rs218076	T	A	0.482166	-0.223703	0.533157	FALSE	15042737	0.00114212	0.102166	2.87039e-06	0.0992425	TRUE
Family Clostridiales	ACNE	Moist	rs11228821	G	T	0.821625	0.162096	0.153715	FALSE	56858541	0.00991116	0.14025	1.52728e-06	0.164288	TRUE
Family Clostridiales	ACNE	Moist	rs6001762	T	C	0.718128	-0.100002	0.187369	FALSE	40099469	0.0176758	0.130042	2.31633e-06	0.14634	TRUE
Family Clostridiales	ACNE	Moist	rs8044738	G	A	-0.493917	0.0373152	0.647678	FALSE	15687197	0.0290102	0.106177	7.12705e-06	0.106269	TRUE
Family Clostridiales	ACNE	Moist	rs12999310	T	C	0.76061	-0.0387421	0.0763174	FALSE	47672592	0.0336744	0.194181	2.8217e-06	0.156428	TRUE
Family Clostridiales	ACNE	Moist	rs6821234	T	C	-0.584972	0.0143109	0.677385	FALSE	69573554	0.035806	0.108588	1.23314e-06	0.115862	TRUE
Family Clostridiales	ACNE	Moist	rs72739986	A	G	0.874068	-0.0149416	0.108163	FALSE	85067767	0.0371111	0.164845	7.12921e-06	0.188064	TRUE
Family Clostridiales	ACNE	Moist	rs1110413	A	C	0.797238	-0.0828744	0.128394	FALSE	76928031	0.0413485	0.0406244	1.1525e-06	0.155044	TRUE
Family Clostridiales	ACNE	Moist	rs1110413	A	C	0.797238	-0.0337627	0.128312	FALSE	76928031	0.0482914	0.0170968	1.1525e-06	0.155044	TRUE
Family Clostridiales	ACNE	Moist	rs11893924	G	T	0.709324	-0.0876163	0.166137	FALSE	114008159	0.0179172	0.0370106	4.24099e-06	0.146718	TRUE
Family Clostridiales	ACNE	Moist	rs13052643	C	T	-0.715992	-0.0735364	0.396024	FALSE	40805742	0.0175368	0.0309594	7.83632e-06	0.152802	TRUE
Family Clostridiales	ACNE	Moist	rs13052643	C	T	-0.715992	-0.0726289	0.396039	FALSE	40805742	0.0167336	0.0303568	7.83632e-06	0.152802	TRUE
Family Clostridiales	ACNE	Moist	rs705455	A	G	0.640985	0.200781	0.61067	FALSE	3487433	0.0450526	0.100182	7.56738e-07	0.122348	TRUE
Family Clostridiales	ACNE	Moist	rs6914521	A	G	0.62402	0.134401	0.444195	FALSE	27287238	1.45409e-08	0.0237169	9.92818e-06	0.134846	TRUE
Family Clostridiales	ACNE	Moist	rs12772279	G	A	-0.690316	0.059961	0.205591	FALSE	80623686	0.0424874	0.0295562	7.48421e-06	0.14697	TRUE
Family Clostridiales	ACNE	Moist	rs11893924	G	T	0.709324	0.111309	0.166071	FALSE	114008159	0.00352874	0.0381526	4.24099e-06	0.146718	TRUE
Genus Anaerococcus	ACNE	Dry	rs705455	A	G	0.640985	-0.0601283	0.610514	FALSE	3487433	0.0417975	0.0295394	7.56738e-07	0.122348	TRUE
Genus Anaerococcus	ACNE	Dry	rs6914521	A	G	0.62402	0.0604648	0.444352	FALSE	27287238	1.6314e-06	0.0126115	9.92818e-06	0.134846	TRUE
Genus Anaerococcus	ACNE	Dry	rs13052643	C	T	-0.715992	0.175254	0.395981	FALSE	40805742	0.0057446	0.0634514	7.83632e-06	0.152802	TRUE
Genus Anaerococcus	ACNE	Dry	rs6914521	A	G	0.62402	0.0370861	0.444057	FALSE	27287238	0.0134868	0.0150107	9.92818e-06	0.134846	TRUE
Genus Anaerococcus	ACNE	Dry	rs705455	A	G	0.640985	0.0204705	0.610687	FALSE	3487433	0.00180298	0.0152783	7.56738e-07	0.122348	TRUE
Genus Anaerococcus	ACNE	Dry	rs13052643	C	T	-0.715992	0.0201292	0.396037	FALSE	40805742	0.00187468	0.0152713	7.83632e-06	0.152802	TRUE
Genus Anaerococcus	ACNE	Dry	rs6575830	G	A	-0.733032	-0.0219709	0.870262	FALSE	101167310	0.00323611	0.0222588	3.94614e-06	0.151081	TRUE
Genus Anaerococcus	ACNE	Dry	rs1110413	A	C	0.797238	0.0218562	0.128317	FALSE	76928031	0.00330088	0.0224411	1.1525e-06	0.155044	TRUE
Genus Anaerococcus	ACNE	Dry	rs12772279	G	A	-0.690316	0.013762	0.205556	FALSE	80623686	0.00458204	0.018552	7.48421e-06	0.14697	TRUE
Genus Anaerococcus	ACNE	Dry	rs11893924	G	T	0.709324	0.00706148	0.16606	FALSE	114008159	0.00727368	0.0202549	4.24099e-06	0.146718	TRUE
Genus Anaerococcus	ACNE	Dry	rs12143250	T	G	1.17097	0.00898705	0.0752418	FALSE	191182513	0.00752542	0.0285042	1.09396e-06	0.227192	TRUE
Genus Anaerococcus	ACNE	Dry	rs12123871	G	A	-0.566105	-0.00341443	0.525497	FALSE	105163757	0.00820211	0.0150234	9.56568e-06	0.12209	TRUE
Genus Anaerococcus	ACNE	Dry	rs12772279	G	A	-0.690316	-0.0235267	0.205723	FALSE	80623686	0.00186771	0.0140224	7.48421e-06	0.14697	TRUE
Genus Anaerococcus	ACNE	Dry	rs12123871	G	A	-0.566105	-0.0116776	0.525221	FALSE	105163757	0.00611354	0.0114002	9.56568e-06	0.12209	TRUE
Genus Anaerococcus	ACNE	Dry	rs6914521	A	G	0.62402	0.0110639	0.44448	FALSE	27287238	0.00661034	0.0113701	9.92818e-06	0.134846	TRUE
Genus Anaerococcus	ACNE	Dry	rs12143250	T	G	1.17097	-0.0200586	0.0752727	FALSE	191182513	0.00708932	0.0216624	1.09396e-06	0.227192	TRUE
Genus Anaerococcus	ACNE	Dry	rs705455	A	G	0.640985	0.0103308	0.609904	FALSE	3487433	0.00745956	0.0115957	7.56738e-07	0.122348	TRUE
Genus Anaerococcus	ACNE	Dry	rs6575830	G	A	-0.733032	0.014195	0.870309	FALSE	101167310	0.00800208	0.01687	3.94614e-06	0.151081	TRUE
Genus Anaerococcus	ACNE	Dry	rs13052643	C	T	-0.715992	0.00726678	0.396052	FALSE	40805742	0.0106007	0.0115722	7.83632e-06	0.152802	TRUE
Genus Anaerococcus	ACNE	Dry	rs11893924	G	T	0.709324	0.00936758	0.165608	FALSE	114008159	0.0108134	0.0153115	4.24099e-06	0.146718	TRUE
Genus Anaerococcus	ACNE	Dry	rs1110413	A	C	0.797238	-0.0025591	0.128342	FALSE	76928031	0.0176076	0.0170054	1.1525e-06	0.155044	TRUE
Genus Anaerococcus	ACNE	Dry	rs1110413	A	C	0.797238	-0.0679466	0.128284	FALSE	76928031	0.00210286	0.0393369	1.1525e-06	0.155044	TRUE
Genus Anaerococcus	ACNE	Dry	rs12123871	G	A	-0.566105	0.0334091	0.525404	FALSE	105163757	0.00513535	0.0263837	9.56568e-06	0.12209	TRUE
Genus Anaerococcus	ACNE	Dry	rs12143250	T	G	1.17097	-0.0515847	0.0753448	FALSE	191182513	0.00756608	0.0500443	1.09396e-06	0.227192	TRUE
Genus Anaerococcus	ACNE	Dry	rs6914521	A	G	0.62402	-0.0208128	0.444225	FALSE	27287238	0.0107381	0.026345	9.92818e-06	0.134846	TRUE
Genus Anaerococcus	ACNE	Dry	rs705455	A	G	0.640985	0.020275	0.609736	FALSE	3487433	0.0112533	0.0268474	7.56738e-07	0.122348	TRUE
Genus Anaerococcus	ACNE	Dry	rs13052643	C	T	-0.715992	0.0123787	0.396061	FALSE	40805742	0.0160928	0.0267639	7.83632e-06	0.152802	TRUE
Genus Anaerococcus	ACNE	Dry	rs12772279	G	A	-0.690316	-0.00914974	0.205864	FALSE	80623686	0.0194332	0.0323538	7.48421e-06	0.14697	TRUE
Genus Anaerococcus	ACNE	Dry	rs6575830	G	A	-0.733032	-0.010312	0.87022	FALSE	101167310	0.0197844	0.0389833	3.94614e-06	0.151081	TRUE
Genus Anaerococcus	ACNE	Dry	rs11893924	G	T	0.709324	0.0057047	0.165498	FALSE	114008159	0.0218015	0.035424	4.24099e-06	0.146718	TRUE
Genus Anaerococcus	ACNE	Dry	rs1110413	A	C	0.797238	0.0811035	0.128448	FALSE	76928031	0.00117831	0.0385412	1.1525e-06	0.155044	TRUE
Genus Anaerococcus	ACNE	Dry	rs11893924	G	T	0.709324	-0.0453396	0.165441	FALSE	114008159	0.00633887	0.0346081	4.24099e-06	0.146718	TRUE
Genus Anaerococcus	ACNE	Dry	rs705455	A	G	0.640985	0.0281268	0.60974	FALSE	3487433	0.00953667	0.0263676	7.56738e-07	0.122348	TRUE
Genus Anaerococcus	ACNE	Dry	rs12143250	T	G	1.17097	-0.0495717	0.0753525	FALSE	191182513	0.010388	0.0489941	1.09396e-06	0.227192	TRUE
Genus Anaerococcus	ACNE	Dry	rs12772279	G	A	-0.690316	-0.0171284	0.205854	FALSE	80623686	0.019637	0.0317118	7.48421e-06	0.14697	TRUE
Genus Anaerococcus	ACNE	Dry	rs6575830	G	A	-0.733032	-0.00829767	0.870226	FALSE	101167310	0.0276231	0.038348	3.94614e-06	0.151081	TRUE
Genus Anaerococcus	ACNE	Dry	rs13052643	C	T	-0.715992	-0.00365067	0.396005	FALSE	40805742	0.029657	0.0263265	7.83632e-06	0.152802	TRUE
Genus Bacteroides	ACNE	Dry	rs6914521	A	G	0.62402	0.00202448	0.444292	FALSE	27287238	0.0312554	0.0258852	9.92818e-06	0.134846	TRUE
Genus Bacteroides	ACNE	Dry	rs12123871	G	A	-0.566105	0.000660081	0.525324	FALSE	105163757	0.0326573	0.0259652	9.56568e-06	0.12209	TRUE
Genus Bacteroides	ACNE	Dry	rs1980578	T	C	-0.462578	0.266254	0.619131	FALSE	43998464	0.00907862	0.102049	6.45601e-06	0.100215	TRUE
Genus Bacteroides	ACNE	Dry	rs7868354	C	T	0.54881	-0.0303676	0.79398	FALSE	97559687	0.0334249	0.0142776	1.63339e-07	0.101629	TRUE
Genus Bacteroides	ACNE	Dry	rs4318543	T	A	-0.452941	0.110319	0.284551	FALSE	4912971	0.0323832	0.0515595	2.36545e-06	0.0935959	TRUE
Genus Bacteroides	ACNE	Dry	rs148964181	G	A	-0.650597	0.0948719	0.115209	FALSE	67741666	0.026606	0.0427881	4.13842e-06	0.137961	TRUE
Genus Bacteroides	ACNE	Dry	rs6944170	T	A	-0.44113	0.271295	0.651564	FALSE	10219166	0.0336008	0.127679	3.87712e-06	0.0932555	TRUE
Genus Bacteroides	ACNE	Dry	rs4937787	C	A	0.629553	-0.108353	0.0902163	FALSE	133505753	0.0414171	0.0531317	6.17669e-06	0.136094	TRUE
Genus Bacteroides	ACNE	Dry	rs80352148	A	G	-0.686679	0.388403	0.104793	FALSE	77673454	0.0151736	0.159955	7.47587e-06	0.149848	TRUE
Genus Bacteroides	ACNE	Dry	rs1980578	T	C	-0.462578	-0.0356561	0.618721	FALSE	43998464	0.0234904	0.0157396	6.45601e-06	0.100215	TRUE
Genus Bacteroides	ACNE	Dry	rs7868354	C	T	0.54881	-0.0765956	0.793967	FALSE	97559687	0.00128644	0.0237949	1.63339e-07	0.101629	TRUE
Genus Bacteroides	ACNE	Dry	rs2259614	G	A	0.390895	0.0533426	0.468208	FALSE	103944701	0.0058213	0.0193433	7.90237e-06	0.0855376	TRUE
Genus Bacteroides	ACNE	Dry	rs4937787	C	A	0.629553	0.268673	0.0899953	FALSE	133505753	0.0277581	0.122086	6.17669e-06	0.136094	TRUE
Genus Bacteroides	ACNE	Dry	rs1862147	C	T	0.412678	0.045591	0.493863	FALSE	155701187	0.036196	0.0217647	9.65071e-06	0.0912188	TRUE
Genus Bacteroides	ACNE	Dry	rs148964181	G	A	-0.650597	0.276272	0.115308	FALSE	67741666	0.00562406	0.0997757	4.13842e-06	0.137961	TRUE
Genus Bacteroides	ACNE	Dry	rs9458153	C	T	-0.466636	0.20404	0.241874	FALSE	161212719	0.00850864	0.0775464	4.62337e-06	0.0994736	TRUE
Genus Bacteroides	ACNE	Dry	rs2259614	G	A	0.390895	-0.0523537	0.468179	FALSE	103944701	0.028503	0.0239026	7.90237e-06	0.0855376	TRUE
Genus Bacteroides	ACNE	Dry	rs4318543	T	A	-0.452941	0.0253431	0.284639	FALSE	4912971	0.0012613	0.016569	2.36545e-06	0.0935959	TRUE
Genus Bacteroides	ACNE	Dry	rs80352148	A	G	-0.686679	0.0339921	0.10478	FALSE	77673454	0.00162229	0.0243215	7.47587e-06	0.149848	TRUE
Genus Bacteroides	ACNE	Dry	rs2259614	G	A	0.390895	0.0151001	0.468387	FALSE	103944701	0.0031437	0.0150086	7.90237e-06	0.0855376	TRUE
Genus Bacteroides	ACNE	Dry	rs148964181	G	A	-0.650597	0.019087	0.115262	FALSE	67741666	0.00416514	0.0234922	4.13842e-06	0.137961	TRUE
Genus Bacteroides	ACNE	Dry	rs4937787	C	A	0.629553	0.018269	0.0901496	FALSE	133505753	0.00482657	0.0260229	6.17669e-06	0.136094	TRUE
Genus Bacteroides	ACNE	Dry	rs9458153	C	T	-0.466636	-0.0114238	0.24182	FALSE	161212719	0.00511948	0.0174194	4.62337e-06	0.0994736	TRUE
Genus Bacteroides	ACNE	Dry	rs1980578	T	C	-0.462578	0.00877626	0.61878	FALSE	43998464	0.00570005	0.01545	6.45601e-06	0.100215	TRUE
Genus Bacteroides	ACNE	Dry	rs7868354	C	T	0.54881	0.00912774	0.793956	FALSE	97559687	0.0062443	0.018644	1.63339e-07	0.101629	TRUE
Genus Bacteroides	ACNE	Dry	rs1862147	C	T	0.412678	0.00566033	0.493406	FALSE	155701187	0.00705492	0.0149777	9.65071e-06	0.0912188	TRUE
Genus Bacteroides	ACNE	Dry	rs6944170	T	A	-0.44113	-0.00301722	0.651542	FALSE	10219166	0.00847621	0.015702	3.87712e-06	0.0932555	TRUE
[truncated: 2,416 more rows]

## Sheet: Table S4
Table S4. Detailed information for instrumental variables between SADs and gut microbiota in the reverse MR
[truncated: 3,260 more rows]

[truncated: 11 more sheets: Table S5, Table S6, Table S7, Table S8, Table S9, Table S10, Table S11, Table S12, Table S13, Table S14, Table S15]
